# Supplementary material for: Efficient iron-catalyzed direct acylation of amines with carboxylic acids and esters under oxygenated conditions
Source: Royal Society of Chemistry journal article supplement (doi:10.1039/d3cy01429k), 2024-01-01

## Supplementary Information

### Efficient iron-catalyzed direct acylation of amines with carboxylic acids and esters under oxygenated conditions

*Maria Obieta, Garazi Urgoitia, María Teresa Herrero, and Raul SanMartin\**

|                                                                                                                                        |     |
|----------------------------------------------------------------------------------------------------------------------------------------|-----|
| 1. General Information                                                                                                                 | S2  |
| 2. Preparation of substrates. Synthesis of esters <b>1</b> from acyl chlorides                                                         | S3  |
| 3. Preparation of substrates. Synthesis of phenyl acetate ( <b>1b</b> ).                                                               | S3  |
| 4. Preparation of substrates. Synthesis of esters from carboxylic acids.<br>General procedure A.                                       | S4  |
| 5. Preparation of substrates. Synthesis of esters from carboxylic acids.<br>General procedure B.                                       | S5  |
| 6. Table S1. Optimization of reaction conditions for the aminolysis of ester <b>1a</b><br>and carboxylic acid <b>2b</b>                | S6  |
| 7. General procedure for the iron-catalyzed acylation of amines with esters<br>under oxygenated conditions                             | S7  |
| 8. General procedure for the iron-catalyzed acylation of amines with<br>carboxylic acids under oxygenated conditions                   | S19 |
| 9. Copy of CheckCIF file for chiral amide <b>4bh</b> .                                                                                 | S26 |
| 10. Copy of CheckCIF file for chiral amide <b>4br</b> .                                                                                | S29 |
| 11. UPLC-ESI-QTOF results.                                                                                                             | S32 |
| 12. Fig S1. A mechanistic proposal for the iron-catalyzed aminolysis of acetic<br>acid <b>2a</b> in the presence of dioxygen.          | S34 |
| 13. Fig. S2. A proposal for the subsidiary mechanism that explains the<br>amidation of ester <b>1a</b> and acid <b>2a</b> under argon. | S35 |
| 14. References                                                                                                                         | S36 |
| 15. NMR Spectra                                                                                                                        | S38 |

## 1. General Information

Unless otherwise stated, all reagents and solvents were purchased from commercial suppliers (Acros Organic, Alfa Aesar, Carlo Erba, Sigma-Aldrich, VWR) and used without further purification. Thin Layer Chromatography (TLC) was carried out on SiO<sub>2</sub> (silica gel 60 F254, Merck), and the spots were located with UV light. Flash chromatography was carried out on SiO<sub>2</sub> (silica gel 60, Merck, 230–400 mesh ASTM). Residual solvents were removed under reduced pressure employing Büchi Re-111, Heidolph VV60 and V4001 rotary evaporators. Melting points were determined using Gallenkamp apparatus in open capillary tubes and are uncorrected. Monodimensional proton and carbon nuclear magnetic resonance spectra (<sup>1</sup>H-NMR and <sup>13</sup>C-NMR) were acquired at 25 °C on a Bruker AC-300 spectrometer (300 MHz for <sup>1</sup>H and 75.4 MHz for <sup>13</sup>C). Chemical shifts (δ) are reported in ppm relative to residual solvent signals (unless indicated, CDCl<sub>3</sub>, 7.26 ppm for <sup>1</sup>H-NMR and 77.00 ppm for <sup>13</sup>C-NMR) and coupling constants (*J*) are displayed in hertz (Hz). The following abbreviations are used to indicate the multiplicity in <sup>1</sup>H-NMR spectra: s, singlet; d, doublet; t, triplet; q, quartet; m, multiplet. <sup>13</sup>C-NMR spectra were acquired using a broad band decoupled mode, and DEPT experiments (Distortionless Enhancement by Polarization Transfer) were performed to determine the numbers of protons attached to each carbon atom. MS spectra were recorded on an Agilent 7890A gas chromatograph coupled to an Agilent 5975 mass spectrometer under electronic impact (EI) conditions. The obtained data is presented in mass units (*m/z*). HRMS were recorded on a Micromass GCT spectrometer using chemical ionization (CI) or on an Acquity UPLC coupled to a QTOF mass spectrometer (Waters) using electrospray ionization (ESI-MS).

## 2. Preparation of substrates. Synthesis of esters **1** from acyl chlorides

In a round bottom flask (100 mL) equipped with a magnetic bar, phenol (1.5 mmol) was dissolved in a solution of 10% aqueous sodium hydroxide (2 mL, 5 mmol) under argon. In another round bottom flask (25 mL) TBACl (0.15 mmol) was dissolved in dry DCM (0.5 mL) under argon. In another round bottom flask (50 mL), the acyl chloride (1.5 mmol) was dissolved in dry DCM (1.5 mL) under argon. After cooling the three solutions to 0 °C, the TBACl and acyl chloride solutions were added via cannula to the phenol solution. The reaction mixture was kept under vigorous stirring at 0 °C for 15 minutes and then poured over 50 mL of icy water. The layers were decanted, and the aqueous layer was extracted twice with 40 mL of Et<sub>2</sub>O. The combined organic layers were washed with brine (1 x 20 mL), dried over anhydrous Na<sub>2</sub>SO<sub>4</sub>, and evaporated *in vacuo*. The following esters **1** were obtained by this procedure:

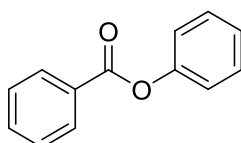

**Phenyl benzoate (1a)**.<sup>1</sup> It was prepared following the above general procedure starting from phenol (175  $\mu$ L, 1.5 mmol) and benzoyl chloride (175  $\mu$ L, 1.5 mmol) to provide **1a** as a white powder (300 mg, >99%). <sup>1</sup>H-NMR (CDCl<sub>3</sub>)  $\delta$ <sub>H</sub> (ppm): 8.22 (d, *J*=7.4, 2H), 7.65 (t, *J*= 7.4, 1H), 7.55-7.42 (m, 4H), 7.31-7.22 (m, 3H); <sup>13</sup>C-NMR (CDCl<sub>3</sub>)  $\delta$ <sub>C</sub> (ppm): 165.2, 151.0, 133.6, 130.2, 129.5, 128.6, 125.9, 121.7; LRMS (*m/z*): 199.1 (MH<sup>+</sup>).

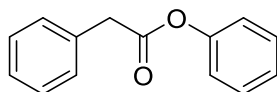

**Phenyl 2-phenylacetate (1c)**.<sup>2</sup> It was prepared following the above general procedure starting from phenol (175  $\mu$ L, 1.5 mmol) and 2-phenylacetyl chloride (198  $\mu$ L, 1.5 mmol) to provide **1c** as a yellowish powder (2.67 g, 84%). <sup>1</sup>H-NMR (CDCl<sub>3</sub>)  $\delta$ <sub>H</sub> (ppm): 7.43-7.37 (m, 8H); 7.13-7.10 (m, 2H); 3.90 (s, 2H); <sup>13</sup>C-NMR (CDCl<sub>3</sub>)  $\delta$ <sub>C</sub> (ppm): 170.0; 150.8; 133.5; 129.4; 129.4; 128.8; 127.4; 125.9; 121.5; 41.5; LRMS (*m/z*): 213.1 (MH<sup>+</sup>)

## 3. Preparation of substrates. Synthesis of phenyl acetate (**1b**).<sup>3</sup>

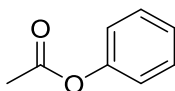

Phenol (1.96 g, 20.9 mmol) was added to a solution of acetic anhydride (3 mL, 30.8 mmol) in pyridine (1 mL) under argon. The mixture was stirred at room temperature until starting material was consumed (monitored by TLC). Upon completion, the reaction was poured onto water (100 mL), and stirred vigorously for further 30 min. The aqueous layer was extracted with EtOAc (3 x 50 mL) and the combined organic layers were washed with aqueous HCl 1M (50 mL), saturated aq. NaHCO<sub>3</sub> (50 mL), water (50 mL) and brine (50 mL), and dried over anhydrous Na<sub>2</sub>SO<sub>4</sub>. The solvent was evaporated under reduced pressure to provide phenyl acetate (**1b**) as a colorless oil (2.34 g, 82%). <sup>1</sup>H-NMR (CDCl<sub>3</sub>)  $\delta$ <sub>H</sub> (ppm): 7.42-7.37 (m, 2H), 7.26-7.14 (m, 3H), 2.24 (s, 3H). <sup>13</sup>C-NMR (CDCl<sub>3</sub>)  $\delta$ <sub>C</sub> (ppm): 169.3, 150.9, 129.5, 125.8, 121.7, 20.9. LRMS (*m/z*): 137.1 (MH<sup>+</sup>).

#### 4. Preparation of substrates. Synthesis of esters from carboxylic acids. General procedure A.

The carboxylic acid (1.2 mmol) was dissolved in dry toluene (2.3 mL), and the solution was chilled to 0 °C under argon. Thionyl chloride (2.4 mmol) was added dropwise. The mixture was stirred for 30 minutes at room temperature and then the reaction was refluxed for 3 hours. After removing the excess of thionyl chloride and toluene by distillation, the resulting acyl chloride was dissolved in DCM (1.2 mL) under argon. Simultaneously, a solution of TBACl (0.12 mmol) in dry DCM (0.4 mL), and a solution of phenol (1.2 mmol) in 10% aqueous sodium hydroxide (1.6 mL) were prepared under argon. The three solutions were chilled to 0 °C, and the TBACl and acyl chloride solutions were added via cannula to the phenol solution. The reaction mixture was kept under vigorous stirring at 0 °C for 15 minutes and then poured over 10 mL of icy water. The layers were decanted, and the aqueous layer was extracted twice with 20 mL of Et<sub>2</sub>O. The combined organic layers were washed with brine (1 x 10 mL), dried over anhydrous Na<sub>2</sub>SO<sub>4</sub>, and evaporated *in vacuo*. The following esters **1** were obtained by this procedure:

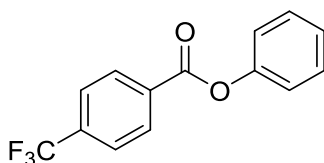

**Phenyl-4-(trifluoromethyl)benzoate (1h).**<sup>4</sup> It was prepared following the above general procedure from phenol (141 mg, 1.5 mmol) and 4-(trifluoromethyl)benzoic acid (285.2 mg, 1.5 mmol) to provide **1h** as a white powder (89 mg, 28%). <sup>1</sup>H-NMR (CDCl<sub>3</sub>) δ<sub>H</sub> (ppm): 8.33 (dd, *J*=8.1, 0.7, 2H), 7.79 (dd, *J*= 8.2, 0.5, 2H), 7.49-7.44 (m, 2H), 7.34-7.22 (m, 3H); <sup>13</sup>C-NMR (CDCl<sub>3</sub>) δ<sub>C</sub> (ppm): 164.0, 150.6, 135.0 (*J*= 32), 130.6, 129.6, 126.2, 125.6 (*J*= 3.7), 123.6 (*J*= 272), 121.5, 118.2; LRMS (*m/z*): 267.0 (MH<sup>+</sup>).

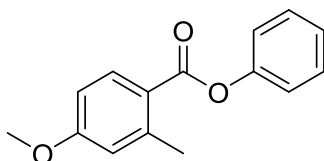

**Phenyl 4-methoxy-2-methylbenzoate (1i).** It was prepared following the above general procedure from phenol (141 mg, 1.5 mmol) and 2-methyl-4-methoxybenzoic acid (276.9 mg, 1.5 mmol) to provide **1i** as a white powder (267mg, 92%). Mp: 78-81°C (Et<sub>2</sub>O); <sup>1</sup>H-NMR (CDCl<sub>3</sub>) δ<sub>H</sub> (ppm): 8.25-8.22 (m, 1H), 7.47-7.45 (m, 2H), 7.27-7.24 (m, 3H), 6.85 (m, 2H), 3.88 (s, 3H), 2.73 (s, 3H); <sup>13</sup>C-NMR (CDCl<sub>3</sub>) δ<sub>C</sub> (ppm): 165.3, 163.0, 151.1, 144.4, 133.7, 129.5, 125.7, 122.0, 117.3, 111.2, 55.4, 22.6; LRMS (*m/z*): 243.1 (MH<sup>+</sup>); HRMS: Calculated for: C<sub>15</sub>H<sub>14</sub>O<sub>3</sub> 242.0943, found: 242.0950.

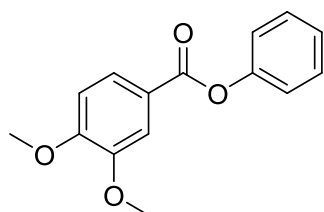

**Phenyl 3,4-dimethoxybenzoate (1j).**<sup>5</sup> It was prepared following the above general procedure starting from phenol (141 mg, 1.5 mmol) and 3,4-dimethoxybenzoic acid (273.3 mg, 1.5 mmol) to provide **1j** as a white powder (269mg, 87%). <sup>1</sup>H-NMR (CDCl<sub>3</sub>) δ<sub>H</sub> (ppm): 7.86(dd, *J*=8.4; 2, 1H), 7.68 (d, *J*=2, 1H), 7.44-7.39 (m, 2H), 7.27-7.19 (m, 3H), 6.93 (d, *J*=8.4, 1H), 3.94 (s, 6H); <sup>13</sup>C-NMR (CDCl<sub>3</sub>) δ<sub>C</sub> (ppm): 164.9, 153.6, 151.1, 148.8, 129.5, 125.8, 124.4, 121.9, 121.8, 112.4, 110.4, 56.0; LRMS (*m/z*): 259.1 (MH<sup>+</sup>).

## 5. Preparation of substrates. Synthesis of esters from carboxylic acids. General procedure B. <sup>6</sup>

A mixture of the carboxylic acid (2.4 mmol), phenol (2.2 mmol) and 4-dimethylaminopyridine (0.12 mmol) was dissolved in dry DCM (4.6 mL) and chilled to 0 °C under argon. A cooled (0 °C) solution of dicyclohexylcarbodiimide (DCC, 2.4 mmol) in dry DCM (4.6 mL) was added dropwise, and the resulting mixture was stirred at 0 °C for 30 minutes and at room temperature for further 16 hours. The mixture was then filtered and the filtrate was washed with a saturated aqueous solution of NaHCO<sub>3</sub> (1 x 50 mL), aqueous 1M HCl (1 x 50 mL) and brine (1 x 50 mL). The organic layer was dried over anhydrous Na<sub>2</sub>SO<sub>4</sub>, and evaporated *in vacuo* to give a residue which was purified by flash column chromatography using petroleum ether:ethyl acetate as eluent. The following esters **1** were obtained by this procedure:

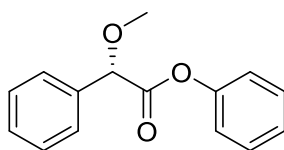

**Phenyl (S)-2-methoxy-2-phenylacetate (1f)**. It was prepared following the above general procedure starting from phenol (205 mg, 2.2 mmol) and (S)-2-methoxy-2-phenylacetic acid (400 mg, 2.4 mmol) to provide **1f** as a white powder (336 mg, 58%).  $[\alpha]_{20/D}^c$ : +208.02°,  $c = 0.04$  in CHCl<sub>3</sub>; <sup>1</sup>H-NMR (CDCl<sub>3</sub>)  $\delta_H$  (ppm): 7.63-7.60 (m, 2H), 7.47-7.34 (m, 5H), 7.26-7.20 (m, 1H), 7.06-7.02 (m, 2H), 5.06 (s, 1H), 3.55 (s, 3H); <sup>13</sup>C-NMR (CDCl<sub>3</sub>)  $\delta_C$  (ppm): 169.2, 150.4, 135.8, 129.4, 129.1, 128.9, 127.4, 126.1, 121.2, 82.6, 57.5; LRMS (m/z): 243.1 (MH<sup>+</sup>); HMRS: Calculated for: C<sub>15</sub>H<sub>15</sub>O<sub>3</sub> 243.10157, found: 243.10133.

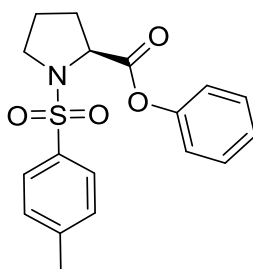

**Phenyl tosyl-L-prolinate (1n)**. It was prepared following the above general procedure starting from phenol (205 mg, 2.2 mmol) and tosyl L-proline (646.4 mg, 2.4 mmol) to provide **1n** as a white powder (273 mg, 33%). Mp (DCM): 86-88°C;  $[\alpha]_{20/D}^c$ : -45.8°,  $c = 0.015$  in CHCl<sub>3</sub>; <sup>1</sup>H-NMR (CDCl<sub>3</sub>)  $\delta_H$  (ppm): 7.81 (d,  $J = 8.2$ , 2H), 7.41-7.09 (m, 7H), 4.48 (t,  $J = 6.4$ , 1H), 3.56-3.52 (m, 1H), 3.41-3.36 (m, 1H), 2.42 (s, 3H), 2.21-2.02 (m, 3H), 1.88-1.82 (m, 1H). <sup>13</sup>C-NMR (CDCl<sub>3</sub>)  $\delta_C$  (ppm): 170.8, 150.6, 143.7, 135.2, 129.8, 129.4, 127.8, 126.0, 121.3, 60.5, 48.5, 31.1, 24.8, 21.5; LRMS (m/z): 346.1; HRMS: Calculated for: C<sub>18</sub>H<sub>20</sub>NO<sub>3</sub>S 346.1106, found: 346.1108.

**6. Table S1.** Optimization of reaction conditions for the aminolysis of ester **1a** and carboxylic acid **2a**.

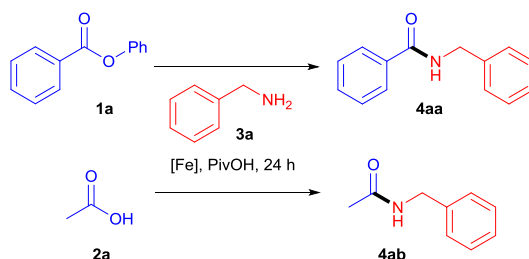

| Entry             | <b>1a/2a</b> | Conditions <sup>a</sup>                                                                           | Product (%) <sup>b</sup> |
|-------------------|--------------|---------------------------------------------------------------------------------------------------|--------------------------|
| 1                 | <b>2a</b>    | FeCl <sub>3</sub> , PhMe, Ar, 100 °C, 12h                                                         | - <sup>c</sup>           |
| 2                 | <b>2a</b>    | FeCl <sub>3</sub> , BF <sub>3</sub> ·OEt <sub>2</sub> , PhMe, Ar, 100 °C, 24h                     | - <sup>c</sup>           |
| 3                 | <b>2a</b>    | FeCl <sub>3</sub> , AlCl <sub>3</sub> , PhMe, Ar, 100 °C, 24h                                     | - <sup>c</sup>           |
| 4                 | <b>2a</b>    | FeCl <sub>3</sub> , TFA, PhMe, Ar, 100 °C, 24h                                                    | <b>4ab</b> (5)           |
| 5                 | <b>2a</b>    | FeCl <sub>3</sub> , <i>p</i> -TsOH, PhMe, Ar, 100 °C, 24h                                         | - <sup>c</sup>           |
| 6                 | <b>2a</b>    | FeCl <sub>3</sub> , PivOH, PhMe, Ar, 100 °C, 24h                                                  | <b>4ab</b> (8)           |
| 7                 | <b>2a</b>    | FeBr <sub>2</sub> , PhMe, Ar, 100 °C, 24h                                                         | - <sup>c</sup>           |
| 8                 | <b>2a</b>    | FeBr <sub>2</sub> , PivOH, PhMe, Ar, 100 °C, 24h                                                  | <b>4ab</b> (7)           |
| 9                 | <b>2a</b>    | FeI <sub>2</sub> , PivOH, PhMe, Ar, 100 °C, 24h                                                   | - <sup>c</sup>           |
| 10                | <b>2a</b>    | Fe <sub>2</sub> (SO <sub>4</sub> ) <sub>3</sub> ·xH <sub>2</sub> O, PivOH, PhMe, Ar, 100 °C, 24h  | - <sup>c</sup>           |
| 11                | <b>2a</b>    | Fe <sub>2</sub> (ClO <sub>4</sub> ) <sub>2</sub> ·xH <sub>2</sub> O, PivOH, PhMe, Ar, 100 °C, 24h | - <sup>c</sup>           |
| 12                | <b>2a</b>    | Fe <sub>2</sub> (ClO <sub>4</sub> ) <sub>3</sub> ·xH <sub>2</sub> O, PivOH, PhMe, Ar, 100 °C, 24h | - <sup>c</sup>           |
| 13                | <b>2a</b>    | Fe(OAc) <sub>2</sub> , PivOH, PhMe, Ar, 100 °C, 24h                                               | - <sup>c</sup>           |
| 14                | <b>2a</b>    | FeO, PivOH, PhMe, Ar, 100 °C, 24h                                                                 | - <sup>c</sup>           |
| 15                | <b>2a</b>    | Fe(acac) <sub>3</sub> , PivOH, PhMe, Ar, 100 °C, 24h                                              | <b>4ab</b> (8)           |
| 16                | <b>2a</b>    | FeBr <sub>2</sub> , PivOH, dioxane, Ar, 100 °C, 24h                                               | <b>4ab</b> (11)          |
| 17                | <b>2a</b>    | Fe(acac) <sub>3</sub> , PivOH, DMF, Ar, 100 °C, 24h                                               | <b>4ab</b> (7)           |
| 18                | <b>2a</b>    | FeCl <sub>3</sub> , PivOH, DMSO, Ar, 100 °C, 24h                                                  | <b>4ab</b> (10)          |
| 19                | <b>2a</b>    | FeBr <sub>2</sub> , PivOH, H <sub>2</sub> O, Ar, 100 °C, 24h                                      | - <sup>c</sup>           |
| 20                | <b>2a</b>    | Fe(acac) <sub>3</sub> , PivOH, EtOH, Ar, 100 °C, 24h                                              | <b>4ab</b> (7)           |
| 21                | <b>2a</b>    | FeCl <sub>3</sub> , PivOH, PEG-400, Ar, 100 °C, 24h                                               | - <sup>c</sup>           |
| 24                | <b>2a</b>    | Fe(acac) <sub>3</sub> , PivOH, DMA, Ar, 100 °C, 24h                                               | <b>4ab</b> (9)           |
| 25                | <b>2a</b>    | Fe(acac) <sub>3</sub> , PivOH, DEC, Ar, 100 °C, 24h                                               | <b>4ab</b> (15)          |
| 26                | <b>2a</b>    | Fe(acac) <sub>3</sub> , PivOH, DEC, Air, 100 °C, 24h                                              | <b>4ab</b> (83)          |
| 27                | <b>2a</b>    | Fe(acac) <sub>3</sub> , PivOH, DEC, O <sub>2</sub> , 100 °C, 24h                                  | <b>4ab</b> (91)          |
| 28                | <b>2a</b>    | Fe(acac) <sub>2</sub> , PivOH, DEC, O <sub>2</sub> , 100 °C, 24h                                  | <b>4ab</b> (89)          |
| 29                | <b>2a</b>    | FeCl <sub>3</sub> , PivOH, DEC, O <sub>2</sub> , 100 °C, 24h                                      | <b>4ab</b> (59)          |
| 30                | <b>2a</b>    | Fe(acac) <sub>3</sub> , PivOH, DEC, O <sub>2</sub> , 100 °C, 12h                                  | <b>4ab</b> (79)          |
| 31                | <b>1a</b>    | Fe(acac) <sub>3</sub> , PivOH, DEC, O <sub>2</sub> , 100 °C, 24h                                  | <b>4aa</b> (90)          |
| 32 <sup>d</sup>   | <b>1a</b>    | Fe(acac) <sub>3</sub> , PivOH, DEC, O <sub>2</sub> , 100 °C, 24h                                  | <b>4aa</b> (79)          |
| 33 <sup>e</sup>   | <b>1a</b>    | Fe(acac) <sub>3</sub> , PivOH, DEC, O <sub>2</sub> , 100 °C, 24h                                  | <b>4aa</b> (59)          |
| 34                | <b>1a</b>    | Fe(acac) <sub>3</sub> , PivOH, DEC, Air, 100 °C, 24h                                              | <b>4aa</b> (90)          |
| 35                | <b>1a</b>    | Fe(acac) <sub>3</sub> , PivOH, DEC, Ar, 100 °C, 24h                                               | <b>4aa</b> (50)          |
| 36                | <b>1a</b>    | Fe(acac) <sub>3</sub> , PivOH, DEC, O <sub>2</sub> , 80 °C, 24h                                   | <b>4aa</b> (90)          |
| 37                | <b>1a</b>    | Fe(acac) <sub>3</sub> , PivOH, DEC, O <sub>2</sub> , 60 °C, 24h                                   | <b>4aa</b> (84)          |
| 38 <sup>f</sup>   | <b>1a</b>    | Fe(acac) <sub>3</sub> , PivOH, DEC, O <sub>2</sub> , 80 °C, 24h                                   | <b>4aa</b> (36)          |
| 39                | <b>2a</b>    | Fe(acac) <sub>3</sub> , PivOH, DEC, O <sub>2</sub> , 80 °C, 24h                                   | <b>4ab</b> (39)          |
| 40 <sup>g</sup>   | <b>2a</b>    | Fe(acac) <sub>3</sub> , PivOH, DEC, O <sub>2</sub> , 100 °C, 24h                                  | <b>4ab</b> (98)          |
| 41 <sup>h</sup>   | <b>1a</b>    | Fe(acac) <sub>3</sub> , PivOH, DEC, O <sub>2</sub> , 80 °C, 24h                                   | <b>4aa</b> (92)          |
| 42 <sup>g,h</sup> | <b>2a</b>    | Fe(acac) <sub>3</sub> , PivOH, DEC, O <sub>2</sub> , 100 °C, 24h                                  | <b>4ab</b> (57)          |
| 43 <sup>i</sup>   | <b>1a</b>    | Fe(acac) <sub>3</sub> , DEC, O <sub>2</sub> , 80 °C, 24h                                          | <b>4aa</b> (52)          |
| 44 <sup>g,i</sup> | <b>2a</b>    | Fe(acac) <sub>3</sub> , DEC, O <sub>2</sub> , 100 °C, 24h                                         | <b>4ab</b> (12)          |
| 45                | <b>1a</b>    | PivOH, DEC, O <sub>2</sub> , 80 °C, 24h                                                           | <b>4aa</b> (15)          |
| 46 <sup>g</sup>   | <b>2a</b>    | PivOH, DEC, O <sub>2</sub> , 100 °C, 24h                                                          | <b>4ab</b> (9)           |
| 47 <sup>g,j</sup> | <b>2a</b>    | Fe(acac) <sub>3</sub> , PivOH, DEC, O <sub>2</sub> , 100 °C, 24h                                  | <b>4aa</b> (33)          |
| 48 <sup>h,j</sup> | <b>1a</b>    | Fe(acac) <sub>3</sub> , PivOH, DEC, O <sub>2</sub> , 80 °C, 24h                                   | <b>4ab</b> (25)          |
| 49 <sup>g,k</sup> | <b>2a</b>    | Fe(acac) <sub>3</sub> , PivOH, DEC, O <sub>2</sub> , 100 °C, 24h                                  | <b>4aa</b> (45)          |
| 50 <sup>h,k</sup> | <b>1a</b>    | Fe(acac) <sub>3</sub> , PivOH, DEC, O <sub>2</sub> , 80 °C, 24h                                   | <b>4ab</b> (70)          |

<sup>a</sup> Reaction conditions: **1a** or **2a** (0.54 mmol), amine **3a** (1.5 equiv.), addit. (1 equiv.), [Fe] (0.01 mol%), solvent (1 mL/mmol of **1a/2a**), Ar, Air or O<sub>2</sub> (1 atm), T, 24h. <sup>b</sup> Isolated yield.

<sup>c</sup> Only traces of target amide were detected. <sup>d</sup> [M] (10<sup>-3</sup> mol%). <sup>e</sup> [M] (10<sup>-4</sup> mol%). <sup>f</sup> Amine **3a** (1.0 equiv.). <sup>g</sup> Amine **3a** (2.0 equiv.). <sup>h</sup> 0.5 equiv. of PivOH were added. <sup>i</sup> No PivOH was added. <sup>j</sup> DEC (2 mL/mmol of **1a/2a**). <sup>k</sup> DEC (0.5 mL/mmol of **1a/2a**).

## 7. General procedure for the iron-catalyzed acylation of amines with esters under oxygenated conditions

A screw-capped tube equipped with a magnetic stirrer bar was charged with the ester **1** (0.54 mmol), amine **3** (0.81 mmol), pivalic acid (0.27 mmol), Fe(acac)<sub>3</sub> (20 μL of a 2.7 x 10<sup>-3</sup> M solution in DEC, 5.4 x 10<sup>-5</sup> mmol) and DEC (0.54 mL). The system was purged with molecular oxygen, and an oxygen-filled balloon (1-1.2 atm) was connected. The mixture was heated at 80 °C under stirring for 48 h. The reaction outcome was monitored by <sup>1</sup>H-NMR. Upon completion, the mixture was cooled down to room temperature, and extracted with aqueous 1M HCl (1 x 10 mL) and water (1 x 10 mL). The aqueous layer was extracted with EtOAc (3 x 10 mL). The combined organic layers were washed with brine (10 mL), dried over anhydrous Na<sub>2</sub>SO<sub>4</sub> and the solvent was evaporated *in vacuo* to provide a residue which was purified by flash column chromatography using petroleum ether:ethyl acetate as eluent. Caution: Care should be taken when heating vessels containing flammable solvents in the presence of high concentrations of dioxygen, as the combination of organic solvent and oxygen gas can represent a significant safety hazard. Please operate away from any potential ignition source. The following amides **4** were obtained by this procedure:

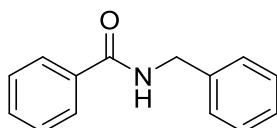

**N-Benzylbenzamide (4aa)**.<sup>7</sup> It was prepared following the above general procedure starting from phenyl benzoate (107 mg, 0.54 mmol) and benzylamine (83 μL, 0.81 mmol) to provide **4aa** after purification by flash chromatography (petroleum ether:EtOAc 7:3) as a white powder (105 mg, 92%). Rf: 0.28 (petroleum ether: EtOAc, 7:3); <sup>1</sup>H-NMR (CDCl<sub>3</sub>) δ<sub>H</sub> (ppm): 7.82-7.69 (m, 2H), 7.49-7.25 (m, 8H), 6.76 (bs, 1H), 4.61 (d, *J*=6, 2H); <sup>13</sup>C-NMR (CDCl<sub>3</sub>) δ<sub>C</sub> (ppm): 167.5, 138.3, 134.4, 131.5, 128.7, 128.6, 127.9, 127.6, 127.1, 44.1; LRMS (m/z): 212.1 (MH<sup>+</sup>)

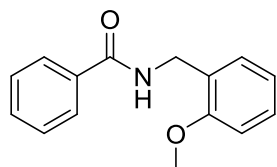

**N-(2-Methoxybenzyl)benzamide (4ac)**.<sup>8</sup> It was prepared following the above procedure starting from phenyl benzoate (107 mg, 0.54 mmol) and 2-methoxybenzylamine (106 μL, 0.81 mmol) to provide **4ac** after purification by flash chromatography (petroleum ether:EtOAc 7:3) as a brownish powder (94 mg, 72%). Rf: 0.23 (petroleum ether:EtOAc 7:3); Mixture of rotamers. Major isomer A: <sup>1</sup>H-NMR (CDCl<sub>3</sub>) δ<sub>H</sub>: 7.78-7.75 (m, 2H), 7.50-7.23 (m, 5H), 6.96-6.88 (m, 2H), 6.74 (bs, 1H), 4.64 (d, *J*= 5.8, 2H), 3.88 (s, 3H); <sup>13</sup>C-NMR (CDCl<sub>3</sub>) δ<sub>C</sub>: 167.2, 157.6, 134.8, 131.3, 129.9, 128.9, 128.5, 126.9, 120.8, 110.4, 55.5, 39.9, 27.6; LRMS (m/z): 242.1 (MH<sup>+</sup>). Minor isomer B: <sup>1</sup>H-NMR (CDCl<sub>3</sub>) δ<sub>H</sub>: 7.78-7.75 (m, 2H), 7.50-7.23 (m, 5H), 6.96-6.88 (m, 2H), 6.74 (bs, 1H), 4.43 (d, *J*= 5.8, 2H), 3.85 (s, 3H); <sup>13</sup>C-NMR (CDCl<sub>3</sub>) δ<sub>C</sub>: 167.2, 157.6, 134.8, 131.3, 129.6, 128.7, 128.5, 126.2, 120.7, 110.3, 55.3, 39.6, 27.2; LRMS (m/z): 242.1 (MH<sup>+</sup>).

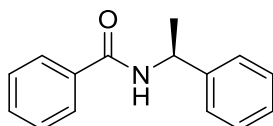

**(S)-N-(1-Phenethyl)benzamide (4ad).**<sup>9</sup> It was prepared following the above procedure starting from phenyl benzoate (107 mg, 0.54 mmol) and (S)-1-phenylethan-1-amine (104  $\mu$ L, 0.81 mmol) to provide **4ad** after purification by flash chromatography (petroleum ether:EtOAc 7:3) as a white powder (104 mg, 86%). Rf: 0.35 (petroleum ether:EtOAc 7:3);  $[\alpha]_{20/D}$ :  $-15.82^\circ$ ,  $c = 0.4$  in  $\text{CHCl}_3$ ;  $^1\text{H-NMR}$  ( $\text{CDCl}_3$ )  $\delta_{\text{H}}$  (ppm): 7.78 (d,  $J = 9$ , 2H), 7.47-7.26 (m, 8H), 6.81 (bs, 1H), 5.32 (q,  $J = 9$ , 1H), 1.58 (d,  $J = 9$ , 3H);  $^{13}\text{C-NMR}$  ( $\text{CDCl}_3$ )  $\delta_{\text{C}}$  (ppm): 166.8, 143.3, 134.6, 131.4, 128.7, 127.1, 127.0, 126.3, 49.3, 21.8; LRMS (m/z): 226.1 ( $\text{MH}^+$ ).

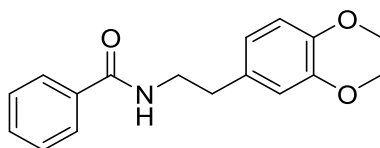

**N-(3,4-Dimethoxyphenethyl)benzamide (4ae).**<sup>10</sup> It was prepared following the above procedure starting from phenyl benzoate (107 mg, 0.54 mmol) and 2-(3,4-dimethoxyphenyl)ethan-1-amine (137  $\mu$ L, 0.81 mmol) to provide **4ae** after purification by flash chromatography (petroleum ether:EtOAc 5:5) as a yellowish powder (115 mg, 75%). Rf: 0.29 (petroleum ether:EtOAc 5:5); Mixture of rotamers. Major isomer A:  $^1\text{H-NMR}$  ( $\text{CDCl}_3$ )  $\delta_{\text{H}}$ : 7.69 (d,  $J = 8$ , 2H), 7.51-7.36 (m, 3H), 6.82-6.70 (m, 3H), 6.29 (bs, 1H), 3.85 (s, 6H), 2.86 (2H, t,  $J = 7$ ), 3.67 (2H, q,  $J = 6.4$ ), 3.85 (6H, s), 6.29 (1H, s), 6.70-6.82 (3H, m), 7.36-7.51 (3H, m), 7.69 (2H, d,  $J = 8$ ).  $^{13}\text{C-NMR}$  ( $\text{CDCl}_3$ )  $\delta_{\text{C}}$ : 27.6, 35.12, 41.3, 55.9, 111.4, 111.9, 120.7, 126.8, 128.5, 131.4, 134.6, 149.1, 167.5. LRMS (m/z): 286.1 ( $\text{MH}^+$ ). Minor isomer B:  $^1\text{H-NMR}$  ( $\text{CDCl}_3$ )  $\delta_{\text{H}}$ : 2.74 (2H, t,  $J = 7$ ), 3.44 (2H, q,  $J = 6.4$ ), 3.82 (6H, s), 6.29 (1H, s), 6.70-6.82 (3H, m), 7.36-7.51 (3H, m), 7.69 (2H, d,  $J = 8$ ).  $^{13}\text{C-NMR}$  ( $\text{CDCl}_3$ )  $\delta_{\text{C}}$ : 27.6, 35.3, 40.7, 55.9, 111.3, 111.9, 120.7, 126.8, 128.5, 131.4, 134.6, 147.7. LRMS (m/z): 286.1 ( $\text{MH}^+$ ).

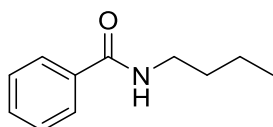

**N-Butylbenzamide (4af).**<sup>11</sup> It was prepared following the above procedure starting from phenyl benzoate (107 mg, 0.54 mmol) and butylamine (80  $\mu$ L, 0.81 mmol) to provide **4af** after purification by flash chromatography (petroleum ether:EtOAc 7:3) as a yellowish oil (74 mg, 89%). Rf: 0.33 (petroleum ether:EtOAc 7:3);  $^1\text{H-NMR}$  ( $\text{CDCl}_3$ )  $\delta_{\text{H}}$  (ppm): 7.79-7.76 (m, 2H), 7.45-7.37 (m, 3H), 6.69 (bs, 1H), 3.41 (dd,  $J = 6, 8$ , 2H), 1.62-1.52 (m, 2H), 1.43-1.31 (m, 2H), 0.93 (t,  $J = 6, 3\text{H}$ );  $^{13}\text{C-NMR}$  ( $\text{CDCl}_3$ )  $\delta_{\text{C}}$  (ppm): 167.6, 134.8, 131.1, 128.4, 126.9, 39.8, 31.7, 20.1, 13.8; LRMS (m/z): 178.1 ( $\text{MH}^+$ ).



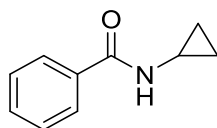

**N-Cyclopropylbenzamide (4ag).**<sup>12</sup> It was prepared following the above procedure starting from phenyl benzoate (107 mg, 0.54 mmol) and butylamine (56  $\mu$ L, 0.81 mmol) to provide **4ag** after purification by flash chromatography (petroleum ether:EtOAc 7:3) as a white powder (81 mg, 93%). Rf: 0.19 (petroleum ether:EtOAc 7:3); <sup>1</sup>H-NMR (CDCl<sub>3</sub>)  $\delta_{\text{H}}$  (ppm): 7.75-7.72 (m, 2H), 7.41-7.29 (m, 3H), 6.3 (bs, 1H), 2.86-2.80 (m, 1H) 0.79-0.73 (m, 2H) 0.62-0.58 (m, 2H); <sup>13</sup>C-NMR (CDCl<sub>3</sub>)  $\delta_{\text{C}}$  (ppm): 169.1, 134.4, 131.4, 128.4, 126.9, 23.2, 6.6; LRMS (m/z): 162.1 (MH<sup>+</sup>)

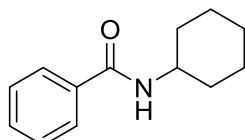

**N-Cyclohexylbenzamide (4ah).**<sup>13</sup> It was prepared following the above procedure starting from phenyl benzoate (107 mg, 0.54 mmol) and cyclohexylamine (93  $\mu$ L, 0.81 mmol) to provide **4ah** after purification by flash chromatography (petroleum ether:EtOAc 7:3) as a white powder (95 mg, 87%). Rf: 0.35 (petroleum ether:EtOAc 7:3); Mixture of rotamers. Major isomer A: <sup>1</sup>H-NMR (CDCl<sub>3</sub>)  $\delta_{\text{H}}$ : 7.75 (d, *J* = 7, 2H), 7.51-7.39 (m, 3H), 6.01 (bs, 1H), 4.04-3.92 (m, 1H), 2.01 (d, *J* = 3.5, 2H), 1.75 (dt, *J* = 13.7, 3.9, 2H), 1.30-1.17 (m, 2H); <sup>13</sup>C-NMR (CDCl<sub>3</sub>)  $\delta_{\text{C}}$ : 166.7, 135.1, 131.2, 128.5, 126.8, 48.7, 27.6, 25.6, 24.9; LRMS (m/z): 204.1 (MH<sup>+</sup>). Minor isomer B: <sup>1</sup>H-NMR (CDCl<sub>3</sub>)  $\delta_{\text{H}}$ : 7.75 (d, *J* = 7, 2H), 7.51-7.39 (m, 3H), 6.01 (bs, 1H), 4.04-3.92 (m, 1H), 2.05 (d, *J* = 3, 2H), 1.65 (dt, *J* = 13, 4, 2H), 1.50-1.37 (m, 2H); <sup>13</sup>C-NMR (CDCl<sub>3</sub>)  $\delta_{\text{C}}$ : 166.7, 135.1, 131.2, 128.5, 126.8, 48.7, 27.6, 25.6, 24.9; LRMS (m/z): 204.1 (MH<sup>+</sup>).

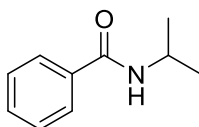

**N-Isopropylbenzamide (4ai).**<sup>14</sup> It was prepared following the above procedure starting from phenyl benzoate (107 mg, 0.54 mmol) and 2-isopropylamine (69  $\mu$ L, 0.81 mmol) to provide **4ai** after purification by flash chromatography (petroleum ether:EtOAc 7:3) as a white powder (58 mg, 66%). Rf: 0.30 (petroleum ether:EtOAc 7:3); <sup>1</sup>H-NMR (CDCl<sub>3</sub>)  $\delta_{\text{H}}$  (ppm): 7.74 (d, *J* = 6, 2H), 7.45-7.32 (m, 3H), 6.34 (bs, 1H), 4.25 (m (7), *J* = 6, 1H), 1.21 (d, *J* = 6, 6H); <sup>13</sup>C-NMR (CDCl<sub>3</sub>)  $\delta_{\text{C}}$  (ppm): 166.8, 134.9, 131.2, 128.4, 126.9, 41.9, 22.7; LRMS (m/z): 164.1 (MH<sup>+</sup>).

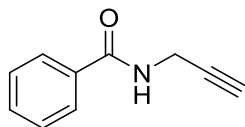

**N-(Prop-2-yn-1-yl)benzamide (4aj).**<sup>15</sup> It was prepared following the above procedure starting from phenyl benzoate (107 mg, 0.54 mmol) and prop-2-yn-1-amine (52  $\mu$ L, 0.81 mmol) to provide **4aj** after purification by flash chromatography (petroleum ether:EtOAc 7:3) as a yellowish powder (67 mg, 78%). Rf: 0.20 (petroleum ether:EtOAc 7:3); <sup>1</sup>H-NMR (CDCl<sub>3</sub>)  $\delta_{\text{H}}$  (ppm): 7.79 (d, *J* = 6, 2H), 7.52-7.38 (m, 3H), 6.67 (bs, 1H), 4.23 (q, *J* = 3, 2H), 2.26 (t, *J* = 3, 1H); <sup>13</sup>C-NMR (CDCl<sub>3</sub>)  $\delta_{\text{C}}$  (ppm): 167.3, 133.7, 131.8, 128.6, 127.1, 79.6, 71.7, 29.7; LRMS (m/z): 159.0 (MH<sup>+</sup>)

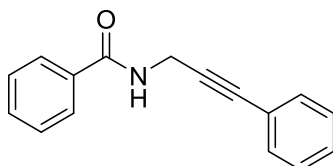

**N-(3-phenylprop-2-yn-1-yl)benzamide (4ak).**<sup>16</sup> It was prepared following the above procedure starting from phenyl benzoate (107 mg, 0.54 mmol) and 3-phenylprop-2-yn-1-amine (106 mg, 0.81 mmol) to provide **4ak** after purification by flash chromatography (petroleum ether:EtOAc 7:3) as a white powder (120 mg, 94%). Rf: 0.43 (petroleum ether:EtOAc 7:3); <sup>1</sup>H-NMR (CDCl<sub>3</sub>) δ<sub>H</sub> (ppm): 7.75-7.72 (m, 2H), 7.44-7.38 (m, 1H), 7.35-7.29 (m, 4H), 7.23-7.19 (m, 3H), 6.59 (bs, 1H, NH), 4.39 (d, 2H, *J* = 5.1); <sup>13</sup>C-NMR (CDCl<sub>3</sub>) δ<sub>C</sub> (ppm): 167.2, 133.9, 131.8, 131.7, 128.6, 128.5, 128.3, 127.1, 122.6, 84.8, 83.6, 30.6; LRMS (m/z): 235.2 (M<sup>+</sup>).

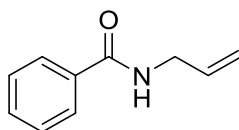

**N-Allylbenzamide (4al).**<sup>15</sup> It was prepared following the above procedure starting from phenyl benzoate (107 mg, 0.54 mmol) and allylamine (61 μL, 0.81 mmol) to provide **4al** after purification by flash chromatography (petroleum ether:EtOAc 7:3) as a yellowish oil (74 mg, 85%). Rf: 0.22 (petroleum ether:EtOAc 7:3); <sup>1</sup>H-NMR (CDCl<sub>3</sub>) δ<sub>H</sub> (ppm): 7.79 (d, *J* = 9, 2H), 7.45-7.33 (m, 3H), 6.86 (bs, 1H), 5.92-5.83 (m, 1H), 5.23-5.10 (m, 2H), 4.03-4.02 (m, 2H); <sup>13</sup>C-NMR (CDCl<sub>3</sub>) δ<sub>C</sub> (ppm): 167.6, 134.2, 134.2, 131.4, 128.4, 127.1, 116.3, 42.4; LRMS (m/z): 162.1 (MH<sup>+</sup>).

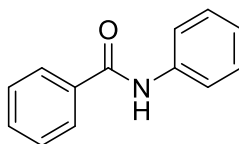

**N-Phenylbenzamide (4am).**<sup>17</sup> It was prepared following the above procedure starting from phenyl benzoate (107 mg, 0.54 mmol) and aniline (74 μL, 0.81 mmol) to provide **4am** after purification by flash chromatography (petroleum ether:EtOAc 7:3) as a brownish powder (94 mg, 88%). Rf: 0.42 (petroleum ether: EtOAc, 7:3); <sup>1</sup>H-NMR (CDCl<sub>3</sub>) δ<sub>H</sub> (ppm): 7.93 (bs, 1H), 7.87 (d, *J* = 9, 2H), 7.65 (d, *J* = 9, 2H), 7.57-7.45 (m, 3H), 7.37 (t, *J* = 9, 2H), 7.15 (t, *J* = 9, 1H); <sup>13</sup>C-NMR (CDCl<sub>3</sub>) δ<sub>C</sub> (ppm): 165.9, 138.0, 134.0, 131.9, 129.2, 128.8, 127.1, 124.6, 120.3; LRMS (m/z): 198.1 (MH<sup>+</sup>).

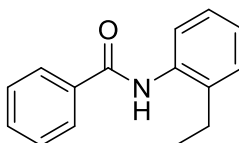

**N-(2-Ethylphenyl)benzamide (4an).**<sup>18</sup> It was prepared following the above procedure starting from phenyl benzoate (107 mg, 0.54 mmol) and 2-ethylaniline (101 μL, 0.81 mmol) to provide **4an** after purification by flash chromatography (DCM 100%) as a white powder (61 mg, 50%). Rf: 0.78 (DCM 100%); <sup>1</sup>H-NMR (CDCl<sub>3</sub>) δ<sub>H</sub> (ppm): 8.20 (bs, 1H), 7.84 (d, *J* = 6, 2H), 7.57-7.41 (m, 5H), 7.17 (d, *J* = 9, 2H), 2.64 (q, *J* = 9, 2H), 1.24 (t, *J* = 9, 3H). <sup>13</sup>C-NMR (CDCl<sub>3</sub>) δ<sub>C</sub> (ppm): 165.9, 135.7, 135.1, 135.0, 131.8, 128.8, 128.6, 127.9, 126.7, 125.8, 124.1, 24.8, 14.0; LRMS (m/z): 226.1 (MH<sup>+</sup>).

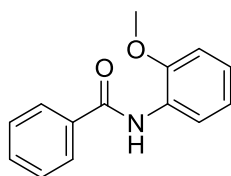

***N*-(2-Methoxyphenyl)benzamide (4ao).**<sup>19</sup> It was prepared following the above procedure starting from phenyl benzoate (107 mg, 0.54 mmol) and 2-methoxyaniline (91  $\mu$ L, 0.81 mmol) to provide **4ao** after purification by flash chromatography (petroleum ether:EtOAc 7:3) as a white powder (60 mg, 49%). Rf: 0.37 (petroleum ether:EtOAc 7:3); <sup>1</sup>H-NMR (CDCl<sub>3</sub>)  $\delta_{\text{H}}$  (ppm): 8.56-8.53 (m, 2H), 7.90 (d,  $J$  = 9, 2H), 7.56-7.48 (m, 3H), 7.12-7.01 (m, 2H), 6.93 (d,  $J$  = 6, 1H), 3.94 (s, 3H); <sup>13</sup>C-NMR (CDCl<sub>3</sub>)  $\delta_{\text{C}}$  (ppm): 165.3, 148.2, 135.3, 131.7, 128.8, 127.8, 127.1, 123.9, 121.2, 119.9, 109.9, 55.8; LRMS (m/z): 228.1 (MH<sup>+</sup>).

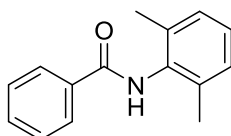

***N*-(2,6-Dimethylphenyl)benzamide (4ap).**<sup>56</sup> It was prepared following the above procedure starting from phenyl benzoate (107 mg, 0.54 mmol) and 3-trifluoromethylaniline (99  $\mu$ L, 0.81 mmol) to provide **4ap** after purification by flash chromatography (petroleum ether:EtOAc 7:3) as a white powder (9 mg, 7%). Rf: 0.50 (petroleum ether:EtOAc 7:3); <sup>1</sup>H-NMR (CDCl<sub>3</sub>)  $\delta_{\text{H}}$  (ppm): 8.04 (bs, 1H), 7.89-7.86 (m, 2H), 7.57-7.51 (m, 1H), 7.44-7.38 (m, 2H), 7.18-7.08 (m, 3H), 2.22 (s, 6H); <sup>13</sup>C-NMR (CDCl<sub>3</sub>)  $\delta_{\text{C}}$  (ppm): 166.1, 135.7, 134.4, 134.2, 131.6, 128.6, 128.2, 127.4, 127.3, 18.4; LRMS (m/z): 225.1 (M<sup>+</sup>).

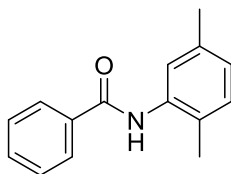

***N*-(2,6-Dimethylphenyl)benzamide (4aq).**<sup>57</sup> It was prepared following the above procedure starting from phenyl benzoate (107 mg, 0.54 mmol) and 3-trifluoromethylaniline (100  $\mu$ L, 0.81 mmol) to provide **4aq** after purification by flash chromatography (petroleum ether:EtOAc 7:3) as a brownish powder (69 mg, 57%). Rf: 0.74 (petroleum ether:EtOAc 7:3); H-NMR (CDCl<sub>3</sub>)  $\delta_{\text{H}}$  (ppm): 7.92-7.89 (m, 2H), 7.82-7.81 (m, 1H), 7.68 (bs, 1H), 7.62-7.49 (m, 3H), 7.13 (d,  $J$  = 7.7, 1H), 6.98-6.94 (m, 1H), 2.37 (s, 3H), 2.31 (s, 3H); <sup>13</sup>C-NMR (CDCl<sub>3</sub>)  $\delta_{\text{C}}$  (ppm): 165.6, 136.7, 135.6, 135.1, 131.8, 130.3, 128.8, 127.0, 126.1, 126.0, 123.7, 21.2, 17.4; LRMS (m/z): 225.1 (M<sup>+</sup>).

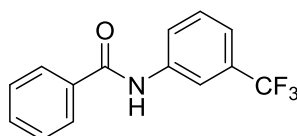

***N*-(3-(Trifluoromethyl)phenyl)benzamide (4ar).**<sup>58</sup> It was prepared following the above procedure starting from phenyl benzoate (107 mg, 0.54 mmol) and 3-trifluoromethylaniline (101  $\mu$ L, 0.81 mmol) to provide **4ar** after purification by flash chromatography (petroleum ether:EtOAc 8:2) as a yellowish powder (76 mg, 53%). Rf: 0.80 (petroleum ether:EtOAc 7:3); <sup>1</sup>H-NMR (CDCl<sub>3</sub>)  $\delta_{\text{H}}$  (ppm): 8.23 (bs, 1H), 7.96 (t,  $J$  = 1.8, 1H), 7.90-7.85 (m, 3H), 7.60-7.54 (m, 1H), 7.50-7.39 (m, 4H); <sup>13</sup>C-NMR (CDCl<sub>3</sub>)  $\delta_{\text{C}}$  (ppm): 166.1, 138.5, 134.3, 132.2, 131.4 ( $J$  = 32.5), 129.6,

128.8 127.1, 123.8 ( $J = 272.5$ ), 123.4 ( $J = 1.5$ ), 121.1 ( $J = 3.9$ ), 117.1 ( $J = 3.9$ ); LRMS ( $m/z$ ): 265.0 ( $M^+$ ).

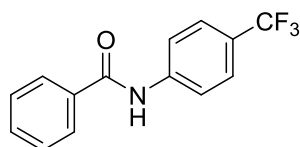

**N-(4-(Trifluoromethyl)phenyl)benzamide (4as).**<sup>58</sup> It was prepared following the above procedure starting from phenyl benzoate (107 mg, 0.54 mmol) and 4-trifluoromethylaniline (101  $\mu$ L, 0.81 mmol) to provide **4as** after purification by flash chromatography (petroleum ether:EtOAc 6:4) as a yellowish powder (72 mg, 50%). Rf: 0.23 (petroleum ether:EtOAc 7:3); <sup>1</sup>H-NMR ( $CH_3OD$ )  $\delta_H$  (ppm): 7.99-7.94 (m, 4H), 7.71-7.66 (m, 2H), 7.66-7.60 (m, 1H) 7.58-7.52 (m, 2H); <sup>13</sup>C-NMR ( $CDCl_3$ )  $\delta_C$  (ppm): 167.6, 142.2, 134.6, 131.8, 128.3, 127.3, 128.8 127.1, 125.6 ( $J = 3.8$ ), 124.3 ( $J = 265.1$ ), 120.3; LRMS ( $m/z$ ): 265.0 ( $M^+$ ).

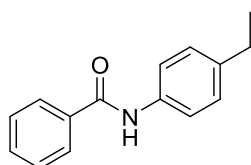

**N-(4-Ethylphenyl)benzamide (4at).**<sup>20</sup> It was prepared following the above procedure starting from phenyl benzoate (107 mg, 0.54 mmol) and 4-ethylaniline (101  $\mu$ L, 0.81 mmol) to provide **4at** after purification by flash chromatography (petroleum ether:EtOAc 7:3) as a white powder (117 mg, 96%). Rf: 0.49 (petroleum ether: EtOAc, 7:3); <sup>1</sup>H-NMR ( $CDCl_3$ )  $\delta_H$  (ppm): 7.89-7.86 (m, 4H), 7.56-7.45 (m, 3H), 7.28-7.14 (m, 3H), 2.68 (q,  $J = 9$ , 2H) 1.27 (t,  $J = 9$ , 3H); <sup>13</sup>C-NMR ( $CDCl_3$ )  $\delta_C$  (ppm): 165.7, 140.7, 135.5, 135.1, 131.7, 128.7, 128.4, 127.0, 120.4, 28.3, 15.7; LRMS ( $m/z$ ): 226.1 ( $MH^+$ )

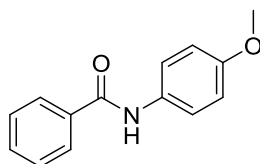

**N-(4-Methoxyphenyl)benzamide (4au).**<sup>21</sup> It was prepared following the above procedure starting from phenyl benzoate (107 mg, 0.54 mmol) and 4-methoxyaniline (93  $\mu$ L, 0.81 mmol) to provide **4au** after purification by flash chromatography (petroleum ether:EtOAc 3:7) as a brown powder (120 mg, 98%). Rf: 0.27 (petroleum ether: EtOAc, 3:7); <sup>1</sup>H-RMN ( $CDCl_3$ )  $\delta_H$  (ppm): 7.80-7.77 (m, 3H,  $H_{arom} + NH$ ), 7.49-7.36 (m, 5H,  $H_{arom}$ ), 6.85-6.80 (m, 2H,  $H_{arom}$ ), 3.73 (s, 3H,  $OCH_3$ ). <sup>13</sup>C-RMN ( $CDCl_3$ )  $\delta_C$  (ppm): 165.7 (CO), 156.6 ( $C_{arom-O}$ ), 135.0 ( $C_{arom}$ ), 131.7 ( $C_{arom-H}$ ), 131.0 ( $C_{arom}$ ), 128.8 ( $C_{arom-H}$ ), 127.0 ( $C_{arom-H}$ ), 122.2 ( $C_{arom-H}$ ), 114.2 ( $C_{arom-H}$ ), 55.5 ( $OCH_3$ ). LRMS ( $m/z$ ): 227.1 ( $M^+$ ).

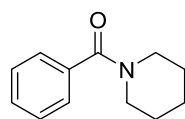

**Phenyl(piperidin-1-yl)methanone (4av).**<sup>22</sup> It was prepared following the above procedure starting from phenyl benzoate (107 mg, 0.54 mmol) and piperidina (80  $\mu$ L, 0.81 mmol) to provide **4av** after purification by flash chromatography (petroleum ether:EtOAc 7:3) as a yellowish oil

(96 mg, 94%). Rf: 0.30 (petroleum ether:EtOAc 7:3);  $^1\text{H-NMR}$  ( $\text{CDCl}_3$ )  $\delta_{\text{H}}$  (ppm): 7.32-7.31 (m, 5H), 3.63 (bs, 2H), 3.27 (s, 2H), 1.59 (s, 4H), 1.45 (s, 2H);  $^{13}\text{C-NMR}$  ( $\text{CDCl}_3$ )  $\delta_{\text{C}}$  (ppm): 170.2, 136.4, 129.3, 128.3, 126.7, 48.7, 43.0, 26.4, 25.7, 24.5; LRMS (m/z): 189.1 ( $\text{MH}^+$ )

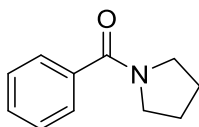

**Phenyl(pyrrolidin-1-yl)methanone (4ax).**<sup>31</sup> It was prepared following the above procedure starting from phenyl benzoate (107 mg, 0.54 mmol) and pyrrolidine (68  $\mu\text{L}$ , 0.81 mmol) to provide **4ax** after purification by flash chromatography (petroleum ether:EtOAc 7:3) as a yellowish powder (72 mg, 76%). Rf: 0.32 (petroleum ether:EtOAc 7:3);  $^1\text{H-NMR}$  ( $\text{CDCl}_3$ )  $\delta_{\text{H}}$  (ppm): 7.47-7.40 (m, 2H), 7.36-7.28 (m, 3H), 3.57 (t,  $J = 7.5$ , 2H), 3.34 (t,  $J = 7.5$ , 2H), 1.92-1.75 (m, 4H);  $^{13}\text{C-NMR}$  ( $\text{CDCl}_3$ )  $\delta_{\text{C}}$  (ppm): 169.6, 137.2, 129.7, 128.2, 127.0, 49.5, 46.1, 26.3, 24.4; LRMS (m/z): 176.1 ( $\text{MH}^+$ )

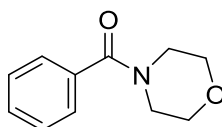

**Morpholino(phenyl)methanone (4ay).**<sup>23</sup> It was prepared following the above procedure starting from phenyl benzoate (107 mg, 0.54 mmol) and morpholine (71  $\mu\text{L}$ , 0.81 mmol) to provide **4ay** after purification by flash chromatography (petroleum ether:EtOAc 7:3) as a yellowish powder (58 mg, 56%). Rf: 0.43 (petroleum ether:EtOAc 7:3);  $^1\text{H-NMR}$  ( $\text{CDCl}_3$ )  $\delta_{\text{H}}$  (ppm): 7.38 (m, 5H), 3.67-3.45 (m, 8H);  $^{13}\text{C-NMR}$  ( $\text{CDCl}_3$ )  $\delta_{\text{C}}$  (ppm): 170.4, 135.3, 129.9, 128.5, 127.1, 66.9; LRMS (m/z): 192.1 ( $\text{MH}^+$ ).

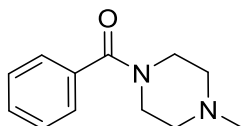

**(4-Methylpiperazin-1-yl)(phenyl)methanone (4az).**<sup>24</sup> It was prepared following the above procedure starting from phenyl benzoate (107 mg, 0.54 mmol) and *N*-methylpiperazine (90  $\mu\text{L}$ , 0.81 mmol) to provide **4az** after purification by flash chromatography (EtOAc:MeOH 9:1) as a yellowish powder (94 mg, 86%). Rf: 0.29 (EtOAc:MeOH 9:1);  $^1\text{H-NMR}$  ( $\text{CDCl}_3$ )  $\delta_{\text{H}}$  (ppm): 7.38 (s, 5H), 3.78 (s, 2H), 3.43 (s, 2H), 2.46 (s, 2H), 2.35 (s, 2H), 2.30 (s, 3H);  $^{13}\text{C-NMR}$  (DMSO)  $\delta_{\text{C}}$  (ppm): 169.4, 136.5, 129.9, 128.9, 127.3, 63.7, 46.1, 14.6; LRMS (m/z): 205.1 ( $\text{MH}^+$ ).

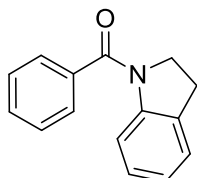

**Indolin-1-yl(phenyl)methanone (4ba).**<sup>25</sup> It was prepared following the above procedure starting from phenyl benzoate (107 mg, 0.54 mmol) and indoline (91  $\mu\text{L}$ , 0.81 mmol) to provide **4ba** after purification by flash chromatography (petroleum ether:DCM 1:9) as a yellowish powder (64 mg, 53%). Rf: 0.30 (petroleum ether:DCM 1:9);  $^1\text{H-NMR}$  ( $\text{CDCl}_3$ )  $\delta_{\text{H}}$  (ppm): 7.57 (d,  $J = 5.9$ , 2H), 7.47 (t,  $J = 7.2$ , 2H), 7.25-7.16 (m, 4H), 7.07 (bs, 1H), 6.990-6.84 (m, 2H), 4.11 (bs, 2H), 3.12 (t,  $J = 8.2$ , 2H);

$^{13}\text{C}$ -NMR (DMSO)  $\delta_{\text{C}}$  (ppm): 169.0, 142.6, 137.0, 130.3, 129.4, 128.6, 127.3, 127.1, 124.9, 123.9, 50.9 (HSQC), 28.7 (HSQC); LRMS (m/z): 224.1 ( $\text{MH}^+$ ).

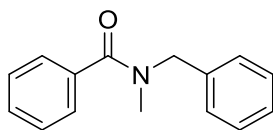

***N*-Benzyl-*N*-methylbenzamide (4bb).**<sup>23</sup> It was prepared following the above procedure starting from phenyl benzoate (107 mg, 0.54 mmol) and *N*-methylbenzylamine (104  $\mu\text{L}$ , 0.81 mmol) to provide **4bb** after purification by flash chromatography (petroleum ether:EtOAc 7:3) as a yellowish powder (109 mg, 89%). Rf: 0.25 (petroleum ether:EtOAc 7:3); Mixture of rotamers: Isomer A:  $^1\text{H}$ -NMR ( $\text{CDCl}_3$ )  $\delta_{\text{H}}$  (ppm): 7.48-7.18 (m, 10H), 4.76 (s, 2H), 3.03 (s, 3H);  $^{13}\text{C}$ -NMR ( $\text{CDCl}_3$ )  $\delta_{\text{C}}$  (ppm): 172.3, 136.2, 129.7, 128.8, 128.5, 128.2, 128.0, 126.9, 55.2, 37.0; LRMS (m/z): 226.1 ( $\text{MH}^+$ ). Isomer B:  $^1\text{H}$ -NMR ( $\text{CDCl}_3$ )  $\delta_{\text{H}}$  (ppm): 7.48-7.18 (m, 10H), 4.51 (s, 2H), 2.86 (s, 3H);  $^{13}\text{C}$ -NMR ( $\text{CDCl}_3$ )  $\delta_{\text{C}}$  (ppm): 171.6, 136.2, 129.7, 128.8, 128.5, 128.2, 128.0, 126.9, 50.8, 33.2; LRMS (m/z): 226.1 ( $\text{MH}^+$ ).

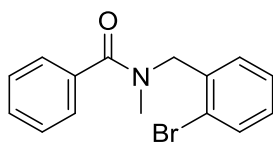

***N*-(2-Bromobenzyl)-*N*-methylbenzamide (4bc).**<sup>26</sup> It was prepared following the above procedure starting from phenyl benzoate (107 mg, 0.54 mmol) and 1-(2-bromophenyl)-*N*-methylmethanamine (120  $\mu\text{L}$ , 0.81 mmol) to provide **4bc** after purification by flash chromatography (petroleum ether:EtOAc 7:3) as a colorless oil (129 mg, 79%). Rf: 0.258 (petroleum ether:EtOAc 7:3); Mixture of rotamers: Major isomer A:  $^1\text{H}$ -NMR ( $\text{CDCl}_3$ )  $\delta_{\text{H}}$  (ppm): 7.56-7.26 (m, 8H), 7.19-7.13 (m, 1H), 4.88 (s, 2H), 3.09 (s, 3H);  $^{13}\text{C}$ -NMR ( $\text{CDCl}_3$ )  $\delta_{\text{C}}$  (ppm): 172.6, 135.8, 129.8, 129.1, 128.5, 127.9, 127.1, 126.7, 55.6, 37.4; LRMS (m/z): 303.1 ( $\text{MH}^+$ ). Minor isomer B:  $^1\text{H}$ -NMR ( $\text{CDCl}_3$ )  $\delta_{\text{H}}$  (ppm): 7.56-7.26 (m, 8H), 7.19-7.13 (m, 1H), 4.56 (s, 2H), 2.90 (s, 3H);  $^{13}\text{C}$ -NMR ( $\text{CDCl}_3$ )  $\delta_{\text{C}}$  (ppm): 171.8, 133.1, 129.3, 129.1, 128.5, 127.9, 127.1, 126.7, 50.8, 33.7; LRMS (m/z): 303.1 ( $\text{MH}^+$ ).

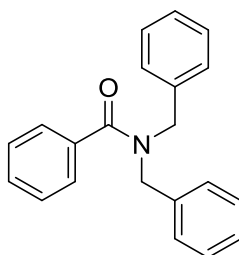

***N,N*-Dibenzylbenzamide (4bd).**<sup>27</sup> It was prepared following the above procedure starting from phenyl benzoate (107 mg, 0.54 mmol) and *N,N*-dibenzylamine (155  $\mu\text{L}$ , 0.81 mmol) to provide **4bd** after purification by flash chromatography (petroleum ether:EtOAc 7:3) as a white powder (92 mg, 57%). Rf: 0.38 (petroleum ether:EtOAc 7:3);  $^1\text{H}$ -NMR ( $\text{CDCl}_3$ )  $\delta_{\text{H}}$  (ppm): 7.53-7.48 (m, 2H), 7.43-7.31 (m, 1H), 7.17 (m, 2H), 4.73 (s, 2H), 4.42 (s, 2H);  $^{13}\text{C}$ -NMR ( $\text{CDCl}_3$ )  $\delta_{\text{C}}$  (ppm): 172.3, 136.5, 129.7, 128.8, 128.6, 128.4, 127.6, 127.1, 126.7, 51.5, 46.9; LRMS: (m/z): 302.1 ( $\text{MH}^+$ ).

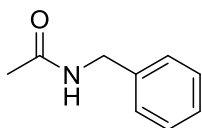

**N-Benzylacetamide (4ab).**<sup>28</sup> It was prepared following the above procedure starting from phenyl acetate (479  $\mu\text{L}$ , 3.78 mmol) and benzylamine (55  $\mu\text{L}$ , 0.54 mmol) to provide **4ab** after purification by flash chromatography (petroleum ether:EtOAc 3:7) as a white powder (88 mg, 99%). **4ab** (78 mg, 97%) was also prepared from methyl acetate (300 mL, 3.78 mmol) and benzylamine (55  $\mu\text{L}$ , 0.54 mmol). **4ab** (53 mg, 68%) was also prepared from ethyl acetate (369  $\mu\text{L}$ , 3.78 mmol) and benzylamine (55  $\mu\text{L}$ , 0.54 mmol). **4ab** (54mg, 68%) was also prepared from trimethylsilyl acetate (569  $\mu\text{L}$ , 3.78 mmol) and benzylamine (55  $\mu\text{L}$ , 0.54 mmol). Rf: 0.34 (petroleum ether:EtOAc 3:7);  $^1\text{H-NMR}$  ( $\text{CDCl}_3$ )  $\delta_{\text{H}}$  (ppm): 7.35-7.25 (m, 5H), 5.97 (bs, 1H), 4.41 (d,  $J= 5.7$ , 2H), 2.00 (s, 3H);  $^{13}\text{C-NMR}$  ( $\text{CDCl}_3$ )  $\delta_{\text{C}}$  (ppm): 170.2, 138.2, 128.7, 127.8, 127.5, 43.7, 23.6; LRMS (m/z): 150.1 ( $\text{MH}^+$ ).

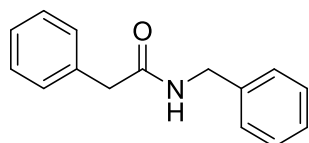

**N-Benzyl-2-phenylacetamide (4be).**<sup>29</sup> It was prepared following the above procedure starting from phenyl 2-phenylacetate (115 mg, 0.54 mmol) and benzylamine (83  $\mu\text{L}$ , 0.81 mmol) to provide **4be** after purification by flash chromatography (petroleum ether:EtOAc 5:5) as a white powder (66 mg, 54%). **4be** (88 mg, 72%) was also prepared from methyl 2-phenylacetate (58 mL, 0.54 mmol) and benzylamine (83 mL, 0.81 mmol). Rf: 0.43 (petroleum ether:EtOAc 5:5);  $^1\text{H-NMR}$  ( $\text{CDCl}_3$ )  $\delta_{\text{H}}$  (ppm): 7.34-7.17 (m, 10H), 6.12 (bs, 1H), 4.38 (d,  $J= 6$ , 2H), 3.58 (s, 2H);  $^{13}\text{C-NMR}$  ( $\text{CDCl}_3$ )  $\delta_{\text{C}}$  (ppm): 171.0, 138.3, 135.0, 129.4, 129.0, 128.6, 127.5, 127.4, 127.3, 43.7, 43.6; LRMS (m/z): 226.1 ( $\text{MH}^+$ ).

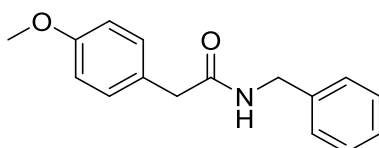

**N-Benzyl-2-(4-methoxyphenyl)acetamide (4bf).**<sup>30</sup> It was prepared following the above procedure starting from methyl 2-(4-methoxyphenyl)acetate (86  $\mu\text{L}$ , 0.54 mmol) and benzylamine (83  $\mu\text{L}$ , 0.81 mmol) to provide **4bf** after purification by flash chromatography (petroleum ether:EtOAc 5:5) as a white powder (90 mg, 66%). Rf: 0.33 (petroleum ether:EtOAc 5:5);  $^1\text{H-NMR}$  ( $\text{CDCl}_3$ )  $\delta_{\text{H}}$  (ppm): 7.33-7.22 (m, 3H), 7.19-7.17 (m, 4H), 6.90-6.85 (m, 2H), 5.75 (s, 1H), 4.40 (d,  $J=5.8$ , 2H), 3.79 (s, 3H), 3.56 (s, 2H);  $^{13}\text{C-NMR}$  ( $\text{CDCl}_3$ )  $\delta_{\text{C}}$  (ppm): 171.3, 158.9, 138.2, 130.5, 128.6, 127.5, 127.4, 126.7, 114.5, 55.3, 43.5, 42.9; LRMS (m/z): 256.1 ( $\text{MH}^+$ ).

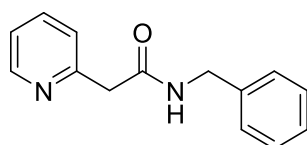

**N-Benzyl-2-(pyridin-2-yl)acetamide (4bg).**<sup>31</sup> It was prepared following the above procedure starting from methyl 2-(pyridin-2-yl)acetate (73  $\mu$ L, 0.54 mmol) and benzylamine (83  $\mu$ L, 0.81 mmol) to provide **4bg** after purification by flash chromatography (petroleum ether:EtOAc 3:7) as an orange powder (86 mg, 70%). However, a slight modification of the work-up procedure was required. Instead of adding the aqueous 1M HCl (10 mL) solution, an aqueous solution of NaOH (1M) was added. Rf: 0.21 (petroleum ether:EtOAc 3:7); <sup>1</sup>H-NMR (CDCl<sub>3</sub>)  $\delta_{\text{H}}$  (ppm): 8.47 (s, 1H), 7.81 (s, 1H), 7.63 (t,  $J=6.7$ , 1H), 7.27-7.15 (m, 7H), 4.43 (d,  $J=4.6$ , 2H), 3.76 (s, 3H); <sup>13</sup>C-NMR (CDCl<sub>3</sub>)  $\delta_{\text{C}}$  (ppm): 169.3, 155.6, 149.0, 138.4, 137.2, 128.5, 127.5, 127.2, 124.1, 122.1, 45.2, 43.4; LRMS (m/z): 227.1 (MH<sup>+</sup>).

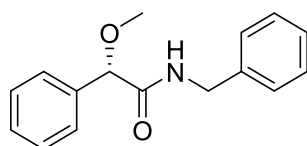

**(S)-N-Benzyl-2-methoxy-2-phenylacetamide (4bh).**<sup>32</sup> It was prepared following the above procedure starting from phenyl (S)-2-methoxy-2-phenylacetate (65 mg, 0.27 mmol) and benzylamine (41  $\mu$ L, 0.40 mmol) to provide **4bh** after purification by flash chromatography (petroleum ether:EtOAc 7:3) as a yellowish powder (114 mg, 83%). Rf: 0.20 (petroleum ether:EtOAc 7:3);  $[\alpha]_{20/D} +18.16^{\circ}$ ,  $c = 0.006$  in CHCl<sub>3</sub>; Mp: 84-86  $^{\circ}$ C (EtOAc); <sup>1</sup>H-NMR (CDCl<sub>3</sub>)  $\delta_{\text{H}}$  (ppm): 7.44-7.26 (m, 10H), 7.09 (bs, 1H), 4.69 (t,  $J=5.5$ , 2H), 3.35 (s, 3H); <sup>13</sup>C-NMR (CDCl<sub>3</sub>)  $\delta_{\text{C}}$  (ppm): 170.5, 138.2, 137.1, 128.7, 128.6, 128.5, 127.8, 127.5, 127.1, 83.8, 57.2, 43.1; LRMS (m/z): 256.1 (MH<sup>+</sup>); HRMS: Calculated for: C<sub>16</sub>H<sub>18</sub>NO<sub>2</sub> 256.1332, found: 256.1331.

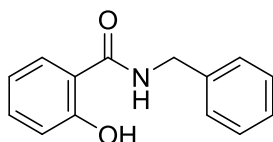

**N-Benzyl-2-hydroxybenzamide (4bi).**<sup>33</sup> It was prepared following the above procedure starting from phenyl 2-hydroxybenzoate (116 mg, 0.54 mmol) and benzylamine (83  $\mu$ L, 0.81 mmol) to provide **4bi** after purification by flash chromatography (petroleum ether:EtOAc 5:5) as a white powder (81 mg, 66%). Rf: 0.50 (petroleum ether:EtOAc 5:5); <sup>1</sup>H-NMR (CDCl<sub>3</sub>)  $\delta_{\text{H}}$  (ppm): 7.42-7.34 (m, 7H), 7.00 (d,  $J=9$ , 1H), 6.83 (t,  $J=6$ , 1H), 6.60 (bs, 1H), 4.64 (d,  $J=6$ , 2H); <sup>13</sup>C-NMR (CDCl<sub>3</sub>)  $\delta_{\text{C}}$  (ppm): 169.8, 161.6, 137.4, 134.4, 128.9, 127.9, 125.3, 118.7, 114.1, 43.7; LRMS (m/z): 228.1 (MH<sup>+</sup>).

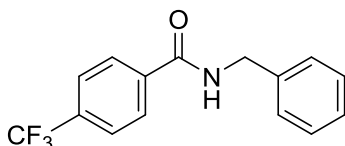

**N-Benzyl-4-(trifluoromethyl)benzamide (4bj).**<sup>34</sup> It was prepared following the above procedure starting from phenyl 4-(trifluoromethyl)benzoate (144 mg, 0.54 mmol) and benzylamine (83  $\mu$ L, 0.81 mmol) to provide **4bj** after purification by flash chromatography (petroleum ether:EtOAc 7:3) as a yellowish powder (62 mg, 55%). Rf: 0.42 (petroleum ether:EtOAc 7:3); <sup>1</sup>H-NMR (CDCl<sub>3</sub>)  $\delta_{\text{H}}$  (ppm): 7.91-7.84 (m, 2H), 7.71-7.68 (m, 2H), 7.36 (s, 5H), 6.44 (s, 1H), 4.66 (d,  $J=5.2$ , 2H). <sup>13</sup>C-NMR (CDCl<sub>3</sub>)  $\delta_{\text{C}}$  (ppm): 166.1, 137.7, 133.3 ( $J=32$ ), 128.9, 128.7, 128.5, 128.0, 127.8, 127.8, 127.5, 125.6 ( $J=3.7$ ), 123.6 ( $J=272$ ), 44.3. LRMS (m/z): 280.1 (MH<sup>+</sup>).



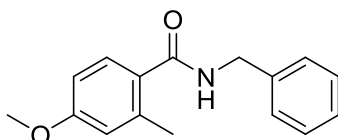

**N-Benzyl-4-methoxy-2-methylbenzamide (4bk).** It was prepared following the above procedure starting from phenyl 4-methoxy-2-methylbenzoate (131 mg, 0.54 mmol) and benzylamine (83  $\mu$ L, 0.81 mmol) to provide **4bk** after purification by flash chromatography (petroleum ether:EtOAc 7:3) as a white powder (115 mg, 83%). Rf: 0.18 (petroleum ether:EtOAc 7:3); Mp: 133-135 $^{\circ}$ C (EtOAc);  $^1\text{H-NMR}$  ( $\text{CDCl}_3$ )  $\delta_{\text{H}}$  (ppm): 7.35-7.26 (m, 6H), 6.73-6.66 (m, 2H), 6.12 (bs, 1H), 4.59 (d,  $J$  = 5.7, 2H), 3.79 (s, 3H), 2.46 (s, 3H);  $^{13}\text{C-NMR}$  ( $\text{CDCl}_3$ )  $\delta_{\text{C}}$  (ppm): 169.6, 160.7, 138.7, 138.4, 128.7, 128.5, 127.8, 127.5, 116.5, 110.8, 55.23, 43.9, 20.4; LRMS (m/z): 256.1 ( $\text{MH}^+$ ); HRMS: [ $\text{M}^+$ ] calc. for  $\text{C}_{16}\text{H}_{17}\text{NO}_2$ : 255.13; found 255.1259.

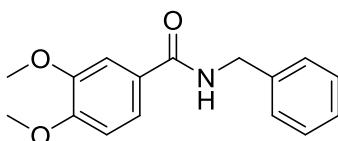

**N-Benzyl-3,4-dimethoxybenzamide (4bl).**<sup>35</sup> It was prepared following the above procedure starting from phenyl 3,4-dimethoxybenzoate (134 mg, 0.54 mmol) and benzylamine (83  $\mu$ L, 0.81 mmol) to provide **4bl** after purification by flash chromatography (petroleum ether:EtOAc 3:7) as a white powder (91 mg, 62%). Rf: 0.50 (petroleum ether:EtOAc 3:7);  $^1\text{H-NMR}$  ( $\text{CDCl}_3$ )  $\delta_{\text{H}}$  (ppm): 7.44-7.28 (m, 7H), 6.89-6.76 (m, 2H), 4.56 (d,  $J$  = 5.8, 2H), 3.85 (s, 3H), 3.82 (s, 3H);  $^{13}\text{C-NMR}$  ( $\text{CDCl}_3$ )  $\delta_{\text{C}}$  (ppm): 167.1, 151.7, 148.9, 138.5, 128.6, 127.8, 127.4, 126.9, 119.6, 110.6, 110.3, 55.9, 55.9, 44.0; LRMS (m/z): 272.1 ( $\text{MH}^+$ ).

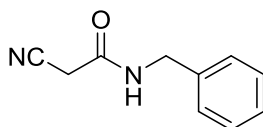

**N-Benzyl-2-cyanoacetamide (4bm).**<sup>36</sup> It was prepared following the above procedure starting from ethyl 2-cyanoacetate (58  $\mu$ L, 0.54 mmol) and benzylamine (83  $\mu$ L, 0.81 mmol) to provide **4bm** after purification by flash chromatography (petroleum ether:EtOAc 5:5) as a white powder (52 mg, 54%). Rf: 0.35 (petroleum ether:EtOAc 5:5);  $^1\text{H-NMR}$  ( $\text{CDCl}_3$ )  $\delta_{\text{H}}$  (ppm): 7.36-7.29 (m, 5H), 6.50 (bs, 1H), 4.46 (d,  $J$  = 6, 2H), 3.38 (s, 2H);  $^{13}\text{C-NMR}$  ( $\text{CDCl}_3$ )  $\delta_{\text{C}}$  (ppm): 160.8, 136.8, 128.9, 128.1, 128.0, 114.7, 44.4, 25.8; LRMS (m/z): 175.1 ( $\text{MH}^+$ )

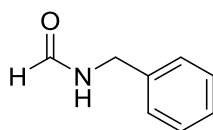

**N-Benzylformamide (4bn).**<sup>37</sup> It was prepared following the above procedure starting from butyl formate (62  $\mu$ L, 0.54 mmol) and benzylamine (83  $\mu$ L, 0.81 mmol) to provide **4bn** after purification by flash chromatography (petroleum ether:EtOAc 3:7) as a white powder (42 mg, 57%). Rf: 0.29 (petroleum ether:EtOAc 3:7); Mixture of rotamers. Major isomer A:  $^1\text{H-NMR}$  ( $\text{CDCl}_3$ )  $\delta_{\text{H}}$ : 8.24 (s, 1H), 7.37-7.23 (m, 5H), 6.01 (bs, 1H), 4.47 (d,  $J$  = 6, 2H);  $^{13}\text{C-NMR}$  ( $\text{CDCl}_3$ )  $\delta_{\text{C}}$ : 161.1, 137.6, 128.8, 127.7, 127.6, 42.1; LRMS (m/z): 136.1 ( $\text{MH}^+$ ). Minor isomer B:  $^1\text{H-NMR}$  ( $\text{CDCl}_3$ )  $\delta_{\text{H}}$ : 8.16 (d,  $J$  = 11.8, 1H), 7.37-7.23 (m, 5H), 6.01 (bs, 1H), 4.40 (d,  $J$  = 6, 2H);  $^{13}\text{C-NMR}$  ( $\text{CDCl}_3$ )  $\delta_{\text{C}}$ : 164.6, 137.5, 128.9, 127.9, 126.9, 45.5; LRMS (m/z): 136.1 ( $\text{MH}^+$ )

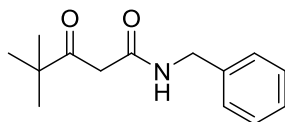

**N-Benzyl-4,4-dimethyl-3-oxopentanamide (4bo).** It was prepared following the above procedure starting from ethyl 4,4-dimethyl-3-oxopentanoate (673  $\mu\text{L}$ , 3.78 mmol) and benzylamine (59  $\mu\text{L}$ , 0.54 mmol) to provide **4bo** after purification by flash chromatography (petroleum ether:EtOAc 7:3) as a yellowish powder (123 mg, 98%). Rf: 0.30 (petroleum ether:EtOAc 7:3); Mp: 65-68 $^{\circ}\text{C}$  (EtOAc);  $^1\text{H-NMR}$  ( $\text{CDCl}_3$ )  $\delta_{\text{H}}$  (ppm): 7.53 (s, 1H), 7.27-7.21 (m, 5H), 4.38 (d,  $J$  = 5.7, 2H), 3.44 (s, 2H), 1.10 (s, 9H);  $^{13}\text{C-NMR}$  ( $\text{CDCl}_3$ )  $\delta_{\text{C}}$  (ppm): 211.2, 166.3, 138.1, 128.6, 127.6, 127.1, 43.6, 43.4, 25.9. LRMS (m/z): 234.1 ( $\text{MH}^+$ ). HRMS: Calculated for:  $\text{C}_{16}\text{H}_{17}\text{NO}_2$  255.1259, found: 255.1257.

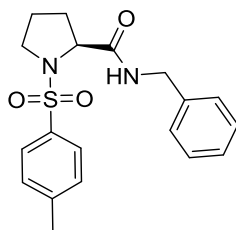

**(S)-N-Benzyl-1-tosylpyrrolidine-2-carboxamide (4bp).** It was prepared following the above procedure starting from phenyl tosyl-L-prolinate (215 mg, 0.62 mmol) and benzylamine (95  $\mu\text{L}$ , 0.93 mmol) to provide **4bp** after purification by flash chromatography (petroleum ether:EtOAc 5:5) as a yellowish powder (173 mg, 78%). Rf: 0.36 (petroleum ether:EtOAc 5:5);  $[\alpha]_{20/\text{D}} -113.8^{\circ}$ ,  $c = 0.025$  in  $\text{CHCl}_3$ ; Mp: 116-119 $^{\circ}\text{C}$  (EtOAc);  $^1\text{H-NMR}$  ( $\text{CDCl}_3$ )  $\delta_{\text{H}}$  (ppm): 7.72 (d,  $J$  = 8.2, 2H), 7.37-7.15 (m, 8H), 4.50 (dd,  $J$  = 5.9, 2.2, 2H), 4.14 (dd,  $J$  = 8.6, 2.8, 1H), 3.53 (m, 1H), 3.17 (m, 1H), 2.44 (s, 3H), 2.22-2.18 (m, 1H), 1.77-1.52 (m, 3H);  $^{13}\text{C-NMR}$  ( $\text{CDCl}_3$ )  $\delta_{\text{C}}$  (ppm): 171.2, 144.5, 138.0, 132.7, 130.0, 128.7, 127.9, 127.5, 127.4, 62.7, 50.0, 43.6, 30.2, 24.4, 21.6; HRMS: Calculated for:  $\text{C}_{19}\text{H}_{23}\text{N}_2\text{O}_3\text{S}$  359.1424, found: 359.1424.

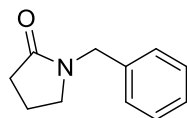

**1-Benzylpyrrolidin-2-one (4bq).**<sup>23</sup> It was prepared following the above procedure starting from ethyl 4-bromobutyrate (78  $\mu\text{L}$ , 0.54 mmol) and benzylamine (83  $\mu\text{L}$ , 0.81 mmol) to provide **4bq** after purification by flash chromatography (petroleum ether:EtOAc 3:7) as a yellowish oil (37 mg, 39%). Rf: 0.16 (petroleum ether:EtOAc 3:7);  $^1\text{H-RMN}$  ( $\text{CDCl}_3$ )  $\delta_{\text{H}}$  (ppm): 7.35-7.22 (m, 5H), 4.45 (s, 2H), 3.26 (t,  $J$  = 9, 2H), 2.44 (t,  $J$  = 9, 2H), 2.01 (q,  $J$  = 9, 2H);  $^{13}\text{C-RMN}$  ( $\text{CDCl}_3$ )  $\delta_{\text{C}}$  (ppm): 174.9, 136.6, 128.7, 128.1, 127.5, 46.6, 30.9, 17.7. LRMS (m/z): 176.1 ( $\text{MH}^+$ ).

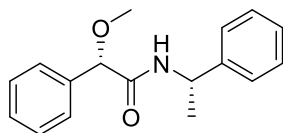

**(S)-2-Methoxy-2-phenyl-N-((S)-1-phenylethyl)acetamide (4br).**<sup>38</sup> It was prepared following the above procedure starting from phenyl (S)-2-methoxy-2-phenylacetate (156 mg, 0.64 mmol) and (S)-1-phenylethan-1-amine (123  $\mu\text{L}$ , 0.96 mmol) to provide **4br** after purification by flash chromatography (petroleum ether:EtOAc 7:3) as a yellowish powder (155 mg, 90%). Rf: 0.27 (petroleum ether:EtOAc 7:3);  $[\alpha]_{20/\text{D}} -4.74^{\circ}$ ,  $c = 0.005$  in  $\text{CHCl}_3$ ; Mp: 109-111  $^{\circ}\text{C}$  (EtOAc);  $^1\text{H-NMR}$  ( $\text{CDCl}_3$ )  $\delta_{\text{H}}$  (ppm): 7.46-7.29 (m, 10H), 7.05 (bs, 1H), 5.21-5.11 (m, 1H), 4.64 (s, 1H), 3.36 (s, 3H), 1.52 (d,  $J$  = 6.9, 3H);  $^{13}\text{C-NMR}$  ( $\text{CDCl}_3$ )  $\delta_{\text{C}}$  (ppm): 169.6, 143.1, 137.1, 128.7, 128.6, 128.4, 127.4, 127.0, 126.3, 83.7, 57.2, 48.3, 21.7; LRMS (m/z): 270.1 ( $\text{MH}^+$ ).

## 8. General procedure for the iron-catalyzed acylation of amines with carboxylic acids under oxygenated conditions

A screw-capped tube equipped with a magnetic stirrer bar was charged with the carboxylic acid **2** (0.54 mmol), amine **3** (1.08 mmol), pivalic acid (0.54 mmol), Fe(acac)<sub>3</sub> (20 μL of a 2.7 × 10<sup>-3</sup> M solution in DEC, 5.4 × 10<sup>-5</sup> mmol) and DEC (0.54 mL). The system was purged with molecular oxygen, and an oxygen-filled balloon (1-1.2 atm) was connected. The mixture was heated at 100 °C under stirring for 48 h. The reaction outcome was monitored by <sup>1</sup>H-NMR. Upon completion, the mixture was cooled down to room temperature, and extracted with saturated aqueous NaHCO<sub>3</sub> (1 × 10 mL) and water (1 × 10 mL). The aqueous layer was extracted with EtOAc (3 × 10 mL). The combined organic layers were washed with brine (10 mL), dried over anhydrous Na<sub>2</sub>SO<sub>4</sub> and the solvent was evaporated *in vacuo* to provide a residue which was purified by flash column chromatography using petroleum ether:ethyl acetate as eluent. Caution: Care should be taken when heating vessels containing flammable solvents in the presence of high concentrations of dioxygen, as the combination of organic solvent and oxygen gas can represent a significant safety hazard. Please operate away from any potential ignition source. The following amides **4** were obtained by this procedure:

**N-Benzylbenzamide (4aa)**.<sup>7</sup> It was prepared following the above procedure starting from benzoic acid (66 mg, 0.54 mmol) and benzylamine (118 μL, 1.08 mmol) to provide **4aa** (83 mg, 78%).

**N-Butylbenzamide (4af)**.<sup>11</sup> It was prepared following the above procedure starting from benzoic acid (66 mg, 0.54 mmol) and *N*-butylamine (107 μL, 1.08 mmol) to provide **4af** (70 mg, 74%).

**N-Cyclopropylbenzamide (4ag)**.<sup>12</sup> It was prepared following the above procedure starting from benzoic acid (66 mg, 0.54 mmol) and *N*-cyclopropylamine (75 μL, 1.08 mmol) to provide **4ag** (59 mg, 68%).

**N-Phenylbenzamide (4am)**.<sup>17</sup> It was prepared following the above procedure starting from benzoic acid (66 mg, 0.54 mmol) and aniline (91 μL, 1.08 mmol) to provide **4am** (85 mg, 75%).

**N-Benzylacetamide (4ab)**.<sup>28</sup> It was prepared following the above procedure starting from acetic acid (31 μL, 0.54 mmol) and benzylamine (118 μL, 1.08 mmol) to provide **4ab** (79 mg, 98%).

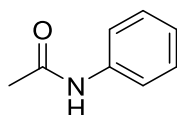

**N-Phenylacetamide (4bs)**.<sup>37</sup> It was prepared following the above procedure starting from acetic acid (31 μL, 0.54 mmol) and aniline (91 μL, 1.08 mmol) to provide **4bs** after purification by flash chromatography (petroleum ether:EtOAc 5:5) as a yellowish powder (62 mg, 85%). Rf: 0.24 (petroleum ether:EtOAc 5:5); <sup>1</sup>H-NMR (CDCl<sub>3</sub>) δ<sub>H</sub> (ppm): 2.14 (3H, s), 7.08 (1H, t, *J* = 7.5), 7.28 (2H, t, *J* = 7.5), 7.51 (2H, d, *J* = 6). <sup>13</sup>C-NMR (CDCl<sub>3</sub>) δ<sub>C</sub> (ppm): 24.4, 120.1, 124.3, 128.9, 138.1, 168.9. LRMS (*m/z*): 136.1(MH<sup>+</sup>).

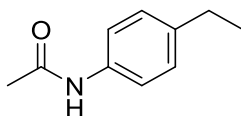

**N-(4-Ethylphenyl)acetamide (4bt).**<sup>39</sup> It was prepared following the above procedure starting from acetic acid (31  $\mu$ L, 0.54 mmol) and 4-ethylaniline (134  $\mu$ L, 1.08 mmol) to provide **4bt** after purification by flash chromatography (petroleum ether:EtOAc 6:4) as a white powder (81 mg, 92%). Rf: 0.30 (petroleum ether:EtOAc 6:4); <sup>1</sup>H-NMR (CDCl<sub>3</sub>)  $\delta$ <sub>H</sub> (ppm): 7.36 (d, *J* = 8.1, 2H), 7.10 (d, *J* = 8, 2H), 2.57 (q, *J* = 7.6, 1H), 2.12 (s, 3H), 1.18 (t, *J* = 7.6, 3H); <sup>13</sup>C-NMR (CDCl<sub>3</sub>)  $\delta$ <sub>C</sub> (ppm): 168.4, 140.4, 135.5, 128.3, 120.2, 28.3, 24.5, 15.6; LRMS (m/z): 164.1 (MH<sup>+</sup>).

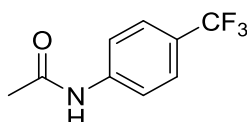

**N-(4-(Trifluoromethyl)phenyl)acetamide (4bu).**<sup>59</sup> It was prepared following the above procedure starting from acetic acid (107 mg, 0.54 mmol) and 3-trifluoromethylaniline (135  $\mu$ L, 1.08 mmol) to provide **4bu** after purification by flash chromatography (petroleum ether:DCM 5:5) as a white powder (22 mg, 20%). Rf: 0.46 (petroleum ether:DCM 7:3); <sup>1</sup>H-NMR (CH<sub>3</sub>OD)  $\delta$ <sub>H</sub> (ppm): 7.78-7.75 (m, 2H), 7.63-7.59 (m, 2H), 2.17 (s, 3H); <sup>13</sup>C-NMR (CH<sub>3</sub>OD)  $\delta$ <sub>C</sub> (ppm): 170.6, 142.1, 125.6 (*J* = 3.7), 125.1 (*J* = 32.5), 124.3 (*J* = 269.5), 119.2, 22.5. LRMS (m/z): 204.1 (MH<sup>+</sup>).

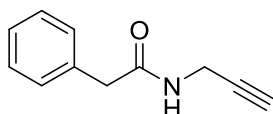

**2-Phenyl-N-(prop-2-yn-1-yl)acetamide (4bv).**<sup>40</sup> It was prepared following the above procedure starting from but-3-ynoic acid (45.4 mg, 0.54 mmol) and prop-2-yn-1-amine (69  $\mu$ L, 1.08 mmol) to provide **4bv** after purification by flash chromatography (petroleum ether:EtOAc 4:6) as a brownish powder (62 mg, 66%). Rf: 0.41 (petroleum ether:EtOAc 4:6); <sup>1</sup>H-NMR (CDCl<sub>3</sub>)  $\delta$ <sub>H</sub> (ppm): 7.39-7.25 (m, 5H), 5.61 (bs, 1H), 4.02 (s, 2H), 3.60 (s, 2H), 2.18 (s, 1H); <sup>13</sup>C-NMR (CDCl<sub>3</sub>)  $\delta$ <sub>C</sub> (ppm): 170.6, 134.4, 129.5, 129.1, 127.5, 79.3, 71.6, 43.5, 29.3; LRMS (m/z): 174.1 (MH<sup>+</sup>).

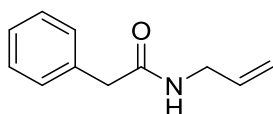

**N-Allyl-2-phenylacetamide (4bx).**<sup>41</sup> It was prepared following the above procedure starting from but-3-ynoic acid (45.4 mg, 0.54 mmol) and allylamine (81  $\mu$ L, 1.08 mmol) to provide **4bx** after purification by flash chromatography (EtOAc 100%) as an orange powder (70 mg, 81%). Rf: 0.54 (EtOAc 100%); <sup>1</sup>H-NMR (CDCl<sub>3</sub>)  $\delta$ <sub>H</sub> (ppm): 7.39-7.35 (m, 5H), 5.83-5.70 (m, 1H), 5.08 (q, *J* = 1.5, 1H), 5.03 (dq, *J* = 8.8, 1.5, 1H), 3.84 (tt, *J* = 5.7, 1.6, 2H), 3.60 (s, 2H); <sup>13</sup>C-NMR (CDCl<sub>3</sub>)  $\delta$ <sub>C</sub> (ppm): 170.8, 134.8, 134.0, 129.5, 129.1, 127.4, 116.1, 43.8, 41.9; LRMS (m/z): 162.1 (MH<sup>+</sup>).

**(S)-N-Benzyl-2-methoxy-2-phenylacetamide (4bh).**<sup>32</sup> It was prepared following the above procedure starting from (S)-2-methoxy-2-phenylacetic acid (90 mg, 0.54 mmol) and benzylamine (118  $\mu$ L, 1.08 mmol) to provide **4bh** (91 mg, 66%).

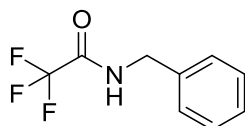

**N-Benzyl-2,2,2-trifluoroacetamide (4by).**<sup>42</sup> It was prepared following the above procedure starting from trifluoroacetic acid (TFA, 41  $\mu$ L, 0.54 mmol) and benzylamine (118  $\mu$ L, 1.08 mmol) to provide **4by** after purification by flash chromatography (petroleum ether:EtOAc 9:1) as an orange powder (64 mg, 59%). Rf: 0.27 (petroleum ether:EtOAc 9:1); <sup>1</sup>H-NMR (CDCl<sub>3</sub>)  $\delta$ <sub>H</sub> (ppm): 7.40-7.27 (m, 5H), 6.96 (bs, 1H), 4.49 (d, *J* = 6, 2H); <sup>13</sup>C-NMR (CDCl<sub>3</sub>)  $\delta$ <sub>C</sub> (ppm): 157.3 (*J* = 37), 135.9, 129.0, 128.3, 127.9, 115.9 (*J* = 288), 43.9; LRMS (m/z): 204 (MH<sup>+</sup>).

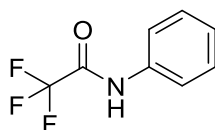

**2,2,2-Trifluoro-N-phenylacetamide (4bz).**<sup>43</sup> It was prepared following the above procedure starting from TFA (41  $\mu$ L, 0.54 mmol) and aniline (91  $\mu$ L, 1.08 mmol) to provide **4bz** after purification by flash chromatography (petroleum ether:EtOAc 7:3) as a yellowish powder (55 mg, 54%). Rf: 0.34 (petroleum ether:EtOAc 7:3); <sup>1</sup>H-NMR (CDCl<sub>3</sub>)  $\delta$ <sub>H</sub> (ppm): 8.10 (bs, 1H), 7.57 (d, *J* = 7.9, 2H), 7.38 (t, *J* = 7.9, 2H), 7.25 (d, *J* = 7.9, 1H); <sup>13</sup>C-NMR (CDCl<sub>3</sub>)  $\delta$ <sub>C</sub> (ppm): 154.9 (*J* = 37), 135.1, 129.3, 126.4, 120.6, 115.4 (*J* = 288); LRMS (m/z): 190.0 (MH<sup>+</sup>).

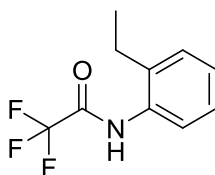

**N-(2-Ethylphenyl)-2,2,2-trifluoroacetamide (4ca).**<sup>44</sup> It was prepared following the above procedure starting from TFA (41  $\mu$ L, 0.54 mmol) and 2-ethylaniline (134  $\mu$ L, 1.08 mmol) to provide **4ca** after purification by flash chromatography (petroleum ether:EtOAc 9:1) as a brownish powder (74 mg, 63%). Rf: 0.31 (petroleum ether:EtOAc 9:1); <sup>1</sup>H-NMR (CDCl<sub>3</sub>)  $\delta$ <sub>H</sub> (ppm): 7.77-7.73 (m, 1H), 7.28-7.26 (m, 3H), 2.62 (q, *J* = 7.6, 2H), 1.26 (t, *J* = 7.6, 3H); <sup>13</sup>C-NMR (CDCl<sub>3</sub>)  $\delta$ <sub>C</sub> (ppm): 155.5 (*J* = 37), 135.8, 132.1, 129, 127.4, 127, 123.8, 115.9 (*J* = 288), 24.1, 13.8; LRMS (m/z): 218.1 (MH<sup>+</sup>).

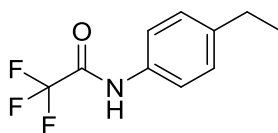

**N-(4-Ethylphenyl)-2,2,2-trifluoroacetamide (4cb).**<sup>45</sup> It was prepared following the above procedure starting from TFA (41  $\mu$ L, 0.54 mmol) and 4-ethylaniline (134  $\mu$ L, 1.08 mmol) to provide **4cb** after purification by flash chromatography (petroleum ether:EtOAc 9:1) as a brownish powder (63 mg, 54%). Rf: 0.29 (petroleum ether:EtOAc 9:1); (63 mg, 54%); <sup>1</sup>H-NMR (CDCl<sub>3</sub>)  $\delta$ <sub>H</sub> (ppm): 7.96 (bs, 1H), 7.46 (d, *J* = 8.4, 2H), 7.21 (d, *J* = 8.3, 2H), 2.65 (q, *J* = 7.6, 2H), 1.23 (t, *J* = 7.6, 3H); <sup>13</sup>C-NMR (CDCl<sub>3</sub>)  $\delta$ <sub>C</sub> (ppm): 154.7 (*J* = 37), 142.6, 132.7, 128.7, 120.6, 115.7 (*J* = 288), 28.4, 15.5; LRMS (m/z): 218.1 (MH<sup>+</sup>).

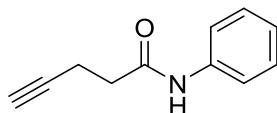

**N-Phenylpent-4-ynamide (4cc).**<sup>46</sup> It was prepared following the above procedure starting from 4-pentynoic acid (53 mg, 0.54 mmol) and aniline (91  $\mu$ L, 1.08 mmol) to provide **4cc** after purification by flash chromatography (petroleum ether:EtOAc 7:3) as a brownish powder (64 mg, 68%). Rf: 0.31 (petroleum ether:EtOAc 7:3); <sup>1</sup>H-NMR (CDCl<sub>3</sub>)  $\delta_{\text{H}}$  (ppm): 7.51 (d,  $J$ = 8.1, 2H), 7.32 (t,  $J$ = 7.9, 2H), 7.18-7.05 (m, 1H), 2.65 (m, 4H), 2.06 (t,  $J$ = 2.6, 1H); <sup>13</sup>C-NMR (CDCl<sub>3</sub>)  $\delta_{\text{C}}$  (ppm): 169.3, 137.7, 129.1, 129, 124.5, 119.9, 82.8, 69.8, 36.3, 14.8; LRMS (m/z): 174.1 (MH<sup>+</sup>).

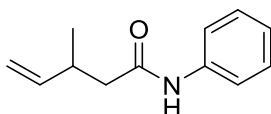

**3-Methyl-N-phenylpent-4-enamide (4cd).**<sup>47</sup> It was prepared following the above procedure starting from 3-methyl-4-pentynoic acid (62 mg, 0.54 mmol) and aniline (91  $\mu$ L, 1.08 mmol) to provide **4cd** after purification by flash chromatography (petroleum ether:EtOAc 7:3) as a brownish powder (45 mg, 44%). Rf: 0.37 (petroleum ether:EtOAc 7:3); <sup>1</sup>H-NMR (CDCl<sub>3</sub>)  $\delta_{\text{H}}$  (ppm): 7.49 (d,  $J$ = 8, 2H), 7.32 (t,  $J$ = 8, 2H), 7.18 (bs, 1H), 7.10 (t,  $J$ = 7.4, 1H), 5.85 (ddd,  $J$ = 17.3, 10.4, 7, 1H), 5.19-4.96 (m, 2H), 2.80 (p,  $J$ = 6.9, 1H), 2.36 (qd,  $J$ = 14.3, 7.2, 2H), 1.13 (d,  $J$ = 6.8, 3H); <sup>13</sup>C-NMR (CDCl<sub>3</sub>)  $\delta_{\text{C}}$  (ppm): 169.9, 142.7, 137.8, 129.0, 124.3, 119.9, 113.9, 44.8, 34.8, 19.7; LRMS (m/z): 190.1 (MH<sup>+</sup>).

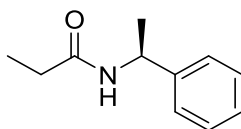

**(S)-N-(1-Phenylethyl)propionamide (4ce).**<sup>48</sup> It was prepared following the above procedure starting from propanoic acid (40  $\mu$ L, 0.54 mmol) and (S)-1-phenylethan-1-amine (139  $\mu$ L, 1.08 mmol) to provide **4ce** after purification by flash chromatography (petroleum ether:EtOAc 5:5) as a white powder (90 mg, 94%). Rf: 0.43 (petroleum ether:EtOAc 5:5);  $[\alpha]_{\text{D}}^{20}$  -17<sup>o</sup>,  $c$  = 1.26 in CHCl<sub>3</sub>; <sup>1</sup>H-NMR (CDCl<sub>3</sub>)  $\delta_{\text{H}}$  (ppm): 7.37-7.23 (m, 5H), 5.74 (bs, 1H), 5.14 (p,  $J$ = 7.1, 1H), 2.20 (q,  $J$ = 7.6, 1H), 1.48 (d,  $J$ = 6.9, 1H), 1.15 (t,  $J$ = 7.6, 2H); <sup>13</sup>C-NMR (CDCl<sub>3</sub>)  $\delta_{\text{C}}$  (ppm): 172.8, 143.3, 128.7, 127.3, 126.2, 48.6, 29.8, 21.7, 9.8; LRMS (m/z): 178.1 (MH<sup>+</sup>).

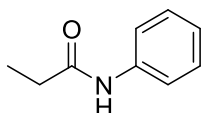

**N-Phenylpropionamide (4cf).**<sup>49</sup> It was prepared following the above procedure starting from propanoic acid (40  $\mu$ L, 0.54 mmol) and aniline (91  $\mu$ L, 1.08 mmol) to provide **4cf** after purification by flash chromatography (petroleum ether:EtOAc 7:3) as a greyish powder (64 mg, 79%). Rf: 0.22 (petroleum ether:EtOAc 7:3); <sup>1</sup>H-NMR (CDCl<sub>3</sub>)  $\delta_{\text{H}}$  (ppm): 7.51 (d,  $J$ = 8, 2H), 7.32 (t,  $J$ = 8, 2H), 7.18 (bs, 1H), 7.10 (t,  $J$ = 7.5, 1H), 2.39 (q,  $J$ = 7.6, 2H), 1.25 (t,  $J$ = 7.5, 3H); <sup>13</sup>C-NMR (CDCl<sub>3</sub>)  $\delta_{\text{C}}$  (ppm): 171.9, 137.9, 129.1, 124.2, 119.73, 30.8, 9.7; LRMS (m/z): 150.1 (MH<sup>+</sup>).

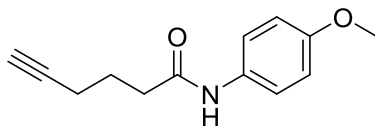

**N-(4-Methoxyphenyl)hex-5-ynamide (4cg).**<sup>50</sup> It was prepared following the above procedure starting from 5-hexynoic acid (60 mg, 0.54 mmol), 4-methoxyaniline (133 mg, 1.08 mmol) and pivalic acid (198 mg, 1.94 mmol) to provide **4cg** after purification by flash chromatography (petroleum ether:EtOAc 6:4) as a blackish powder (61 mg, 52%). Rf: 0.23 (petroleum ether:EtOAc 6:4); <sup>1</sup>H-NMR (CDCl<sub>3</sub>) δ<sub>H</sub> (ppm): 7.40 (d, *J* = 8.9, 2H), 7.22 (bs, 1H), 6.84 (d, *J* = 9, 2H), 3.79 (s, 3H), 2.48 (t, *J* = 7.3, 2H), 2.32 (td, *J* = 6.8, 2.7, 2H), 2.01 (t, *J* = 2.6, 1H), 1.94 (t, *J* = 7, 2H); <sup>13</sup>C-NMR (CDCl<sub>3</sub>) δ<sub>C</sub> (ppm): 170.4, 156.4, 130.9, 121.8, 114.1, 83.5, 69.4, 55.5, 35.8, 24.0, 17.8; LRMS (m/z): 218.1 (MH<sup>+</sup>).

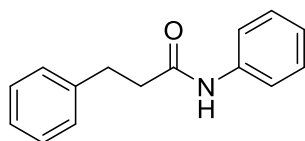

**N-3-Diphenylpropanamide (4ch).**<sup>51</sup> It was prepared following the above procedure starting from hydrocinnamic acid (81 mg, 0.54 mmol), aniline (91 μL, 1.08 mmol) and pivalic acid (198 mg, 1.94 mmol) to provide **4ch** after purification by flash chromatography (petroleum ether:EtOAc 8:2) as a greyish powder (79 mg, 65%). Rf: 0.34 (petroleum ether:EtOAc 8:2); <sup>1</sup>H-NMR (CDCl<sub>3</sub>) δ<sub>H</sub> (ppm): 7.43 (d, *J* = 7.7, 2H), 7.33-7.20 (m, 6H+CDCl<sub>3</sub>), 7.12-7.06 (m, 2H), 3.05 (t, *J* = 7.5, 2H), 2.66 (t, *J* = 7.5, 2H); <sup>13</sup>C-NMR (CDCl<sub>3</sub>) δ<sub>C</sub> (ppm): 170.4, 140.6, 137.7, 128.9, 128.7, 128.4, 126.4, 124.3, 119.9, 39.5, 31.6; LRMS (m/z): 226.1 (MH<sup>+</sup>).

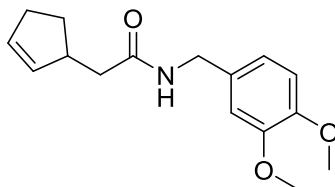

**2-(Cyclopent-2-en-1-yl)-N-(3,4-dimethoxybenzyl)acetamide (4ci).** It was prepared following the above procedure starting from 2-cyclopenten-1-acetic acid (68 mg, 0.54 mmol) and 3,4-dimethoxybenzylamine (168 μL, 1.08 mmol) to provide **4ci** after purification by flash chromatography (petroleum ether:EtOAc 5:5) as an off-white powder (61 mg, 41%). Rf: 0.27 (petroleum ether:EtOAc 5:5); <sup>1</sup>H-NMR (CDCl<sub>3</sub>) δ<sub>H</sub> (ppm): 6.81 (s, 3H), 5.77-5.66 (m, 3H), 4.38 (d, *J* = 5.7, 2H), 3.86 (s, 6H), 3.19-3.10 (m, 1H), 2.48-2.00 (m, 5H), 1.52-1.41 (m, 1H); <sup>13</sup>C-NMR (CDCl<sub>3</sub>) δ<sub>C</sub> (ppm): 171.9, 149.2, 148.5, 133.9, 131.6, 131.1, 120.1, 111.2, 55.9, 55.8, 43.4, 42.9, 42.7, 31.9, 29.6; LRMS (m/z): 276.1 (MH<sup>+</sup>); HRMS: Calculated for: C<sub>16</sub>H<sub>21</sub>NO<sub>3</sub> 275.1521, found 275.1520.

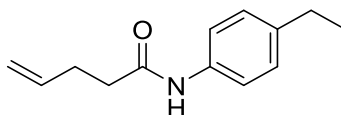

**N-(4-Ethylphenyl)pent-4-enamide (4cj).**<sup>52</sup> It was prepared following the above procedure starting from 4-pentenoic acid (54 mg, 0.54 mmol) and 4-ethylaniline (134 μL, 1.08 mmol) to provide **4cj** after purification by flash chromatography (petroleum ether:EtOAc 8:2) as a brownish powder (60 mg, 55%). Rf: 0.42 (petroleum ether:EtOAc 8:2); <sup>1</sup>H-NMR (CDCl<sub>3</sub>) δ<sub>H</sub> (ppm): 7.40 (d, *J* = 8.4, 2H), 7.22 (bs, 1H), 7.14 (d, *J* = 8.4, 2H), 5.93-5.82 (m, 1H), 5.15-5.03 (m, 2H), 2.61

(q,  $J = 7.6$ , 2H), 2.52-2.42 (m, 4H), 1.21 (t,  $J = 7.6$ , 3H);  $^{13}\text{C-NMR}$  ( $\text{CDCl}_3$ )  $\delta_{\text{C}}$  (ppm): 170.5, 140.4, 136.9, 135.4, 128.3, 120.1, 115.9, 36.8, 29.5, 28.3, 15.7; LRMS ( $m/z$ ): 204.1 ( $\text{MH}^+$ ).

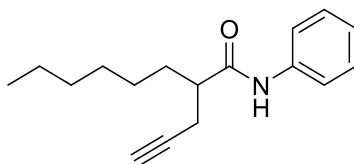

**N-Phenyl-2-(prop-2-yn-1-yl)octanamide (4ck).** It was prepared following the above procedure starting from 2-hexyl-4-pentynoic acid (105  $\mu\text{L}$ , 0.54 mmol) and aniline (91  $\mu\text{L}$ , 1.08 mmol) to provide **4ck** after purification by flash chromatography (petroleum ether:EtOAc 7:3) as a yellowish oil (55 mg, 54%). Rf: 0.31 (petroleum ether:EtOAc 7:3); (90 mg, 65%);  $^1\text{H-NMR}$  ( $\text{CDCl}_3$ )  $\delta_{\text{H}}$  (ppm): 7.44-7.26 (m, 3H), 7.12-7.08 (m, 2H), 2.66-2.54 (m, 1H), 2.52-2.35 (m, 2H), 2.01 (t,  $J = 2.6$ , 1H), 1.75-1.65 (m, 2H), 1.31-1.26 (m, 10H), 0.88 (t,  $J = 6$ , 3H);  $^{13}\text{C-NMR}$  ( $\text{CDCl}_3$ )  $\delta_{\text{C}}$  (ppm): 179.6, 137.9, 129.3, 124.3, 121.3, 81.3, 69.9, 44.2, 31.6, 31.0, 29.1, 26.8, 22.6, 20.8, 14.0; LRMS ( $m/z$ ): 258.1 ( $\text{MH}^+$ ); HRMS: Calculated for:  $\text{C}_{17}\text{H}_{24}\text{NO}$  258.1852, found 258.1848.

**Phenyl(piperidin-1-yl)methanone (4av).**<sup>22</sup> It was prepared following the above procedure starting from acetic acid (31  $\mu\text{L}$ , 0.54 mmol) and piperidine (107  $\mu\text{L}$ , 1.08 mmol) to provide **4av** (67 mg, 66%).

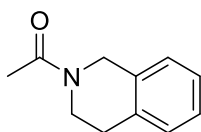

**1-(3,4-Dihydroisoquinolin-2(1H)-yl)ethan-1-one (4cl).**<sup>53</sup> It was prepared following the above procedure starting from acetic acid (31  $\mu\text{L}$ , 0.54 mmol) and 1,2,3,4-tetrahydroisoquinoline (135  $\mu\text{L}$ , 1.08 mmol) to provide **4cl** after purification by flash chromatography (petroleum ether:EtOAc 1:9) as an orange powder (66 mg, 70%). Rf: 0.25 (petroleum ether:EtOAc 1:9); Mixture of rotamers, major isomer A:  $^1\text{H-NMR}$  ( $\text{CDCl}_3$ )  $\delta_{\text{H}}$ : 2.17 (3H, s), 2.83-2.92 (2H, m), 3.67 (2H, t,  $J = 5.9$ ), 4.72 (2H, s), 7.08-7.22 (4H, m).  $^{13}\text{C-NMR}$  ( $\text{CDCl}_3$ )  $\delta_{\text{C}}$ : 21.7, 29.4, 44.1, 48.1, 126.4, 126.6, 126.7, 128.3, 133.5, 134.0, 169.6. LRMS ( $m/z$ ): 176.1 ( $\text{MH}^+$ ). Minor isomer B:  $^1\text{H-NMR}$  ( $\text{CDCl}_3$ )  $\delta_{\text{H}}$ : 2.18 (3H, s), 2.83 (2H, m), 3.81 (2H, t,  $J = 5.9$ ), 4.61 (2H, s), 7.08-7.22 (4H, m).  $^{13}\text{C-NMR}$  ( $\text{CDCl}_3$ )  $\delta_{\text{C}}$ : 21.9, 28.5, 39.5, 44.3, 126.0, 126.5, 126.9, 128.9, 132.6, 135.1, 169.5. LRMS ( $m/z$ ): 176.1 ( $\text{MH}^+$ ).

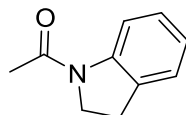

**N-Acetylindoline (4cm).**<sup>54</sup> It was prepared following the above procedure starting from 4-acetic acid (31  $\mu\text{L}$ , 0.54 mmol) and indoline (60  $\mu\text{L}$ , 1.08 mmol) to provide **4cm** after purification by flash chromatography (petroleum ether:EtOAc 7:3) as a brownish powder (78 mg, 90%). Rf: 0.33 (petroleum ether:EtOAc 7:3);  $^1\text{H-NMR}$  ( $\text{CDCl}_3$ )  $\delta_{\text{H}}$  (ppm): 2.21 (3H, s), 3.18 (2H, t,  $J = 8.5$ ), 4.03 (2H, t,  $J = 8.5$ ), 7.01 (1H, t,  $J = 7$ ), 7.16-7.21 (2H, m), 8.21 (1H, d,  $J = 7$ ).  $^{13}\text{C-NMR}$  ( $\text{CDCl}_3$ )  $\delta_{\text{C}}$  (ppm): 24.2, 28.0, 48.7, 116.9, 123.6, 124.5, 127.5, 131.1, 141.9, 168.7. LRMS ( $m/z$ ): 162.1 ( $\text{MH}^+$ ).



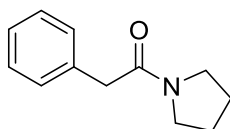

**2-Phenyl-1-(pyrrolidin-1-yl)ethan-1-one (4cn).**<sup>55</sup> It was prepared following the above procedure starting from phenylacetic acid (74 mg, 0.54 mmol) and pyrrolidine (90  $\mu$ L, 1.08 mmol) to provide **4cn** after purification by flash chromatography (petroleum ether:EtOAc 3:7) as a yellowish oil (61 mg, 61%). Rf: 0.23 (petroleum ether:EtOAc 3:7); Mixture of rotamers. Isomer A: <sup>1</sup>H-NMR (CDCl<sub>3</sub>)  $\delta_{\text{H}}$  (ppm): 1.63-1.73 (2H, m), 3.28 (2H, t,  $J = 6$ ), 3.53 (2H, s, CH<sub>2</sub>), 7.08-7.22 (5H, m). <sup>13</sup>C-NMR (CDCl<sub>3</sub>)  $\delta_{\text{C}}$  (ppm): 24.3, 42.1, 46.8, 126.5, 128.4, 129.0, 135.0, 169.3. LRMS (m/z): 190.1 (MH<sup>+</sup>). Isomer B: <sup>1</sup>H-RMN (CDCl<sub>3</sub>)  $\delta_{\text{H}}$ : 1.74-1.81 (2H, m), 3.36 (2H, t,  $J = 6$ ), 3.53 (2H, s), 7.08-7.22 (5H, m). <sup>13</sup>C-RMN (CDCl<sub>3</sub>)  $\delta_{\text{C}}$ : 26.0, 45.8, 46.8, 126.5, 128.4, 129.0, 135.0, 169.3. LRMS (m/z): 190.1 (MH<sup>+</sup>).

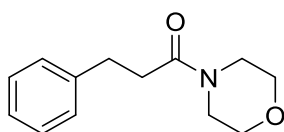

**1-Morpholino-3-phenylpropan-1-one (4co).**<sup>27</sup> It was prepared following the above procedure starting from hydrocinnamic acid (81 mg, 0.54 mmol) and morpholine (94  $\mu$ L, 1.08 mmol) to provide **4co** after purification by flash chromatography (EtOAc:MeOH 9.5:0.5) as a yellowish oil (74 mg, 63%). Rf: 0.45 (EtOAc:MeOH 9.5:0.5); <sup>1</sup>H-NMR (CDCl<sub>3</sub>)  $\delta_{\text{H}}$  (ppm): 7.32-7.18 (m, 5H), 3.62 (s, 4H), 3.51 (t,  $J = 4.5$ , 2H), 3.35 (t,  $J = 4.5$ , 2H), 2.98 (t,  $J = 7.4$ , 2H), 2.61 (t,  $J = 7.4$ , 2H); <sup>13</sup>C-NMR (CDCl<sub>3</sub>)  $\delta_{\text{C}}$  (ppm): 170.9, 141.1, 128.6, 128.5, 126.3, 66.9, 66.5, 45.9, 41.9, 34.8, 31.5; LRMS: (m/z): 220.1 (MH<sup>+</sup>).

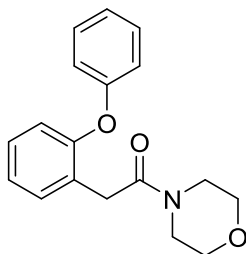

**1-Morpholino-2-(2-phenoxyphenyl)ethan-1-one (4cp).** It was prepared following the above procedure starting from 2-(phenoxyphenyl)acetic acid (123.3 mg, 0.54 mmol) and morpholine (94  $\mu$ L, 1.08 mmol) to provide **4cp** after purification by flash chromatography (petroleum ether:EtOAc 6:4) as a yellowish powder (104 mg, 65%). Rf: 0.23 (petroleum ether:EtOAc 6:4); <sup>1</sup>H-NMR (CDCl<sub>3</sub>)  $\delta_{\text{H}}$  (ppm): 7.39 (d,  $J = 7.4$ , 1H), 7.32 (t,  $J = 7.8$ , 2H), 7.23 (t,  $J = 7.9$ , 1H), 7.15-7.06 (m, 2H), 6.95-6.87 (m, 3H), 3.72 (s, 2H), 3.59 (s, 4H), 3.48 (s, 4H); <sup>13</sup>C-NMR (CDCl<sub>3</sub>)  $\delta_{\text{C}}$  (ppm): 169.6, 157.3, 154.0, 130.9, 129.9, 128.5, 126.7, 124.1, 123.2, 119.2, 118, 66.8, 66.6, 46.4, 42.2, 34.0; LRMS (m/z): 298.1 (MH<sup>+</sup>); HRMS: Calculated for: C<sub>18</sub>H<sub>21</sub>NO<sub>3</sub> 297.1365, found 297.1362



---

The following ALERTS were generated. Each ALERT has the format

**test-name\_ALERT\_alert-type\_alert-level.**

Click on the hyperlinks for more details of the test.

---

**Alert level C**

|                   |                                                                 |    |        |
|-------------------|-----------------------------------------------------------------|----|--------|
| PLAT790_ALERT_4_C | Centre of Gravity not Within Unit Cell: Resd. #<br>C16 H17 N O2 | 1  | Note   |
| PLAT911_ALERT_3_C | Missing FCF Refl Between Thmin & STh/L= 0.600                   | 10 | Report |
| PLAT913_ALERT_3_C | Missing # of Very Strong Reflections in FCF ....                | 7  | Note   |

---

**Alert level G**

|                   |                                                  |         |        |
|-------------------|--------------------------------------------------|---------|--------|
| PLAT007_ALERT_5_G | Number of Unrefined Donor-H Atoms .....          | 1       | Report |
| PLAT063_ALERT_4_G | Crystal Size Possibly too Large for Beam Size .. | 0.75    | mm     |
| PLAT142_ALERT_4_G | s.u. on b - Axis Small or Missing .....          | 0.00009 | Ang.   |
| PLAT143_ALERT_4_G | s.u. on c - Axis Small or Missing .....          | 0.00020 | Ang.   |
| PLAT910_ALERT_3_G | Missing # of FCF Reflection(s) Below Theta(Min). | 1       | Note   |
| PLAT967_ALERT_5_G | Note: Two-Theta Cutoff Value in Embedded .res .. | 138.0   | Degree |
| PLAT978_ALERT_2_G | Number C-C Bonds with Positive Residual Density. | 6       | Info   |

---

0 **ALERT level A** = Most likely a serious problem - resolve or explain  
0 **ALERT level B** = A potentially serious problem, consider carefully  
3 **ALERT level C** = Check. Ensure it is not caused by an omission or oversight  
7 **ALERT level G** = General information/check it is not something unexpected

0 ALERT type 1 CIF construction/syntax error, inconsistent or missing data  
1 ALERT type 2 Indicator that the structure model may be wrong or deficient  
3 ALERT type 3 Indicator that the structure quality may be low  
4 ALERT type 4 Improvement, methodology, query or suggestion  
2 ALERT type 5 Informative message, check

---

It is advisable to attempt to resolve as many as possible of the alerts in all categories. Often the minor alerts point to easily fixed oversights, errors and omissions in your CIF or refinement strategy, so attention to these fine details can be worthwhile. In order to resolve some of the more serious problems it may be necessary to carry out additional measurements or structure refinements. However, the purpose of your study may justify the reported deviations and the more serious of these should normally be commented upon in the discussion or experimental section of a paper or in the "special\_details" fields of the CIF. checkCIF was carefully designed to identify outliers and unusual parameters, but every test has its limitations and alerts that are not important in a particular case may appear. Conversely, the absence of alerts does not guarantee there are no aspects of the results needing attention. It is up to the individual to critically assess their own results and, if necessary, seek expert advice.

### Publication of your CIF in IUCr journals

A basic structural check has been run on your CIF. These basic checks will be run on all CIFs submitted for publication in IUCr journals (*Acta Crystallographica*, *Journal of Applied Crystallography*, *Journal of Synchrotron Radiation*); however, if you intend to submit to *Acta Crystallographica Section C* or *E* or *IUCrData*, you should make sure that full publication checks are run on the final version of your CIF prior to submission.

### Publication of your CIF in other journals

Please refer to the *Notes for Authors* of the relevant journal for any special instructions relating to CIF submission.

---

PLATON version of 06/07/2023; check.def file version of 30/06/2023

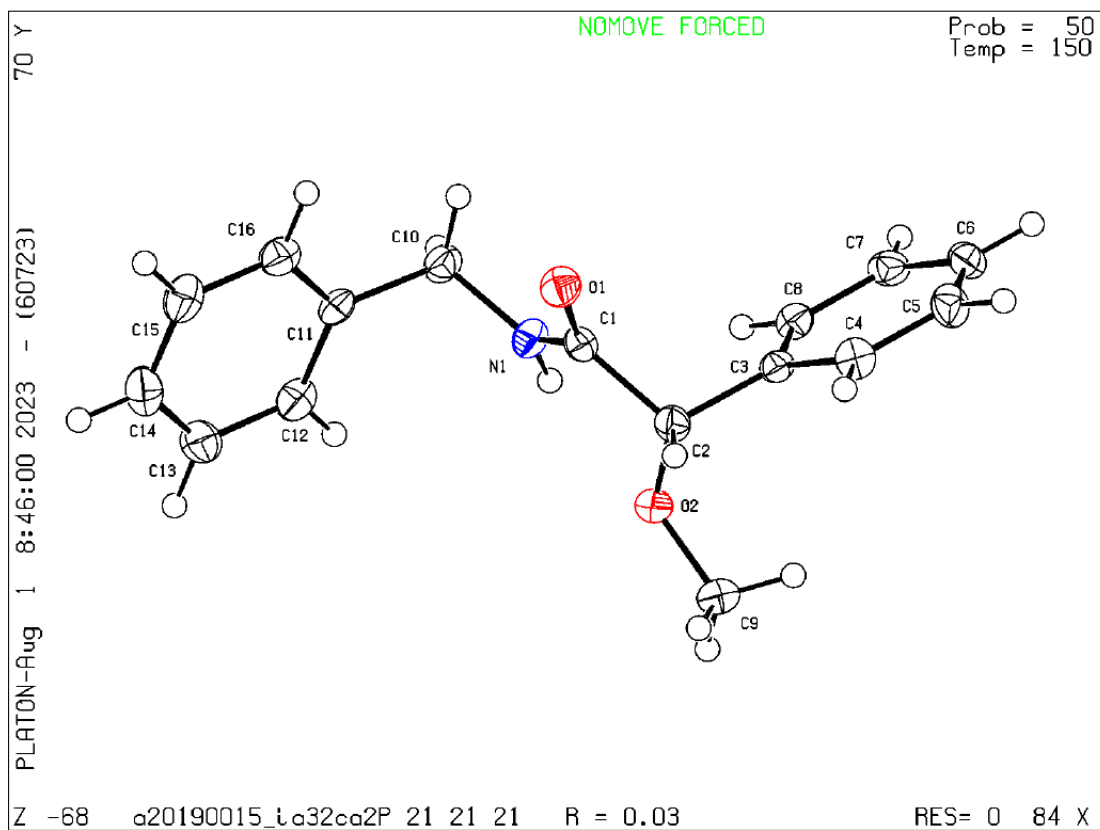

## 10. Copy of the CheckCIF file for chiral amide 4br

Note: CCDC 2290372 contains the supplementary crystallographic data for this paper

### checkCIF/PLATON report

Structure factors have been supplied for datablock(s) b20230143\_o342m2remducu

THIS REPORT IS FOR GUIDANCE ONLY. IF USED AS PART OF A REVIEW PROCEDURE FOR PUBLICATION, IT SHOULD NOT REPLACE THE EXPERTISE OF AN EXPERIENCED CRYSTALLOGRAPHIC REFEREE.

No syntax errors found. CIF dictionary Interpreting this report

### Datablock: b20230143\_o342m2remducu

---

Bond precision: C-C = 0.0066 Å Wavelength=1.54184  
Cell: a=5.4042 (1) b=22.6075 (4) c=23.7568 (4)  
alpha=90 beta=95.144 (2) gamma=90  
Temperature: 170 K

|                        | Calculated    | Reported     |
|------------------------|---------------|--------------|
| Volume                 | 2890.81 (9)   | 2890.81 (9)  |
| Space group            | P 21          | P 1 21 1     |
| Hall group             | P 2yb         | P 2yb        |
| Moiety formula         | C17 H19 N O2  | C17 H19 N O2 |
| Sum formula            | C17 H19 N O2  | C17 H19 N O2 |
| Mr                     | 269.33        | 269.33       |
| Dx, g cm <sup>-3</sup> | 1.238         | 1.238        |
| Z                      | 8             | 8            |
| Mu (mm <sup>-1</sup> ) | 0.643         | 0.643        |
| F000                   | 1152.0        | 1152.0       |
| F000'                  | 1155.33       |              |
| h, k, lmax             | 6, 27, 28     | 6, 27, 28    |
| Nref                   | 10782 [ 5539] | 10736        |
| Tmin, Tmax             | 0.922, 0.938  | 0.803, 0.942 |
| Tmin'                  | 0.683         |              |

Correction method= # Reported T Limits: Tmin=0.803 Tmax=0.942  
AbsCorr = ANALYTICAL

Data completeness= 1.94/1.00 Theta(max)= 68.994

R(reflections)= 0.0601 ( 9216) wR2(reflections)=  
S = 1.131 Npar= 807 0.1738 ( 10736)

---

The following ALERTS were generated. Each ALERT has the format  
**test-name\_ALERT\_alert-type\_alert-level.**  
Click on the hyperlinks for more details of the test.

---

● **Alert level C**

|                   |                                               |         |        |
|-------------------|-----------------------------------------------|---------|--------|
| PLAT089_ALERT_3_C | Poor Data / Parameter Ratio (Zmax < 18) ..... | 6.86    | Note   |
| PLAT230_ALERT_2_C | Hirshfeld Test Diff for O1B --C1B .....       | 5.7     | s.u.   |
| PLAT340_ALERT_3_C | Low Bond Precision on C-C Bonds .....         | 0.00657 | Ang.   |
| PLAT911_ALERT_3_C | Missing FCF Refl Between Thmin & STh/L= 0.600 | 2       | Report |

---

● **Alert level G**

|                   |                                                    |       |             |
|-------------------|----------------------------------------------------|-------|-------------|
| PLAT002_ALERT_2_G | Number of Distance or Angle Restraints on AtSite   | 2     | Note        |
| PLAT003_ALERT_2_G | Number of Uiso or Uij Restrained non-H Atoms ...   | 16    | Report      |
| PLAT007_ALERT_5_G | Number of Unrefined Donor-H Atoms .....            | 4     | Report      |
| PLAT172_ALERT_4_G | The CIF-Embedded .res File Contains DFIX Records   | 1     | Report      |
| PLAT186_ALERT_4_G | The CIF-Embedded .res File Contains ISOR Records   | 2     | Report      |
| PLAT301_ALERT_3_G | Main Residue Disorder .....                        | 40%   | Note        |
| PLAT398_ALERT_2_G | Deviating C-O-C Angle From 120 for O2D ..          | 101.9 | Degree      |
| PLAT410_ALERT_2_G | Short Intra H...H Contact H15D ..H2E ..            | 2.14  | Ang.        |
|                   | x,y,z =                                            | 1_555 | Check       |
| PLAT720_ALERT_4_G | Number of Unusual/Non-Standard Labels .....        | 1     | Note        |
| PLAT860_ALERT_3_G | Number of Least-Squares Restraints .....           | 98    | Note        |
| PLAT883_ALERT_1_G | No Info/Value for _atom_sites_solution_primary ..  |       | Please Do ! |
| PLAT910_ALERT_3_G | Missing # of FCF Reflection(s) Below Theta(Min) .. | 1     | Note        |
| PLAT933_ALERT_2_G | Number of HKL-OMIT Records in Embedded .res File   | 4     | Note        |
| PLAT967_ALERT_5_G | Note: Two-Theta Cutoff Value in Embedded .res ..   | 138.0 | Degree      |
| PLAT978_ALERT_2_G | Number C-C Bonds with Positive Residual Density.   | 0     | Info        |

---

- 0 **ALERT level A** = Most likely a serious problem - resolve or explain  
0 **ALERT level B** = A potentially serious problem, consider carefully  
4 **ALERT level C** = Check. Ensure it is not caused by an omission or oversight  
15 **ALERT level G** = General information/check it is not something unexpected
- 1 ALERT type 1 CIF construction/syntax error, inconsistent or missing data  
7 ALERT type 2 Indicator that the structure model may be wrong or deficient  
6 ALERT type 3 Indicator that the structure quality may be low  
3 ALERT type 4 Improvement, methodology, query or suggestion  
2 ALERT type 5 Informative message, check
- 

It is advisable to attempt to resolve as many as possible of the alerts in all categories. Often the minor alerts point to easily fixed oversights, errors and omissions in your CIF or refinement strategy, so attention to these fine details can be worthwhile. In order to resolve some of the more serious problems it may be necessary to carry out additional measurements or structure refinements. However, the purpose of your study may justify the reported deviations and the more serious of these should normally be commented upon in the discussion or experimental section of a paper or in the "special\_details" fields of the CIF. checkCIF was carefully designed to identify outliers and unusual parameters, but every test has its limitations and alerts that are not important in a particular case may appear. Conversely, the absence of alerts does not guarantee there are no aspects of the results needing attention. It is up to the individual to critically assess their own results and, if necessary, seek expert advice.

#### Publication of your CIF in IUCr journals

A basic structural check has been run on your CIF. These basic checks will be run on all CIFs submitted for publication in IUCr journals (*Acta Crystallographica*, *Journal of Applied Crystallography*, *Journal of Synchrotron Radiation*); however, if you intend to submit to *Acta Crystallographica Section C* or *E* or *IUCrData*, you should make sure that full publication checks are run on the final version of your CIF prior to submission.

#### Publication of your CIF in other journals

Please refer to the *Notes for Authors* of the relevant journal for any special instructions relating to CIF submission.

---

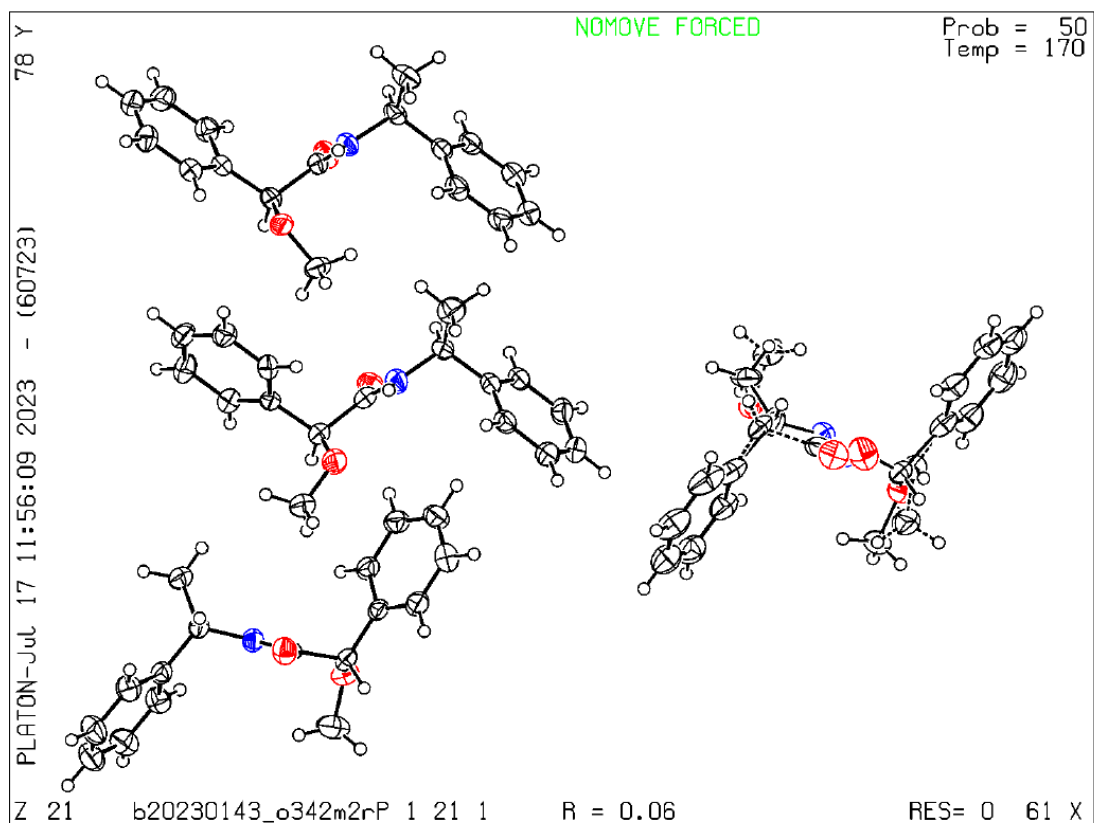

## 11. UPLC-ESI-QTOF-MS results

· Acetylacetone (pentane-2,4-dione) (MH<sup>+</sup>)

### Elemental Composition Report

Page 1

#### Single Mass Analysis

Tolerance = 5.0 PPM / DBE: min = -1.5, max = 50.0

Element prediction: Off

Number of isotope peaks used for i-FIT = 3

Monoisotopic Mass, Even Electron Ions

73 formula(e) evaluated with 1 results within limits (up to 50 best isotopic matches for each mass)

Elements Used:

C: 0-40 H: 0-40 N: 0-5 O: 0-6 Na: 0-1

MO-1558

PAT230524-94425-1 (0.037) Is (1.00,1.00) C5H9O2

1: TOF MS ES+  
9.40e+012

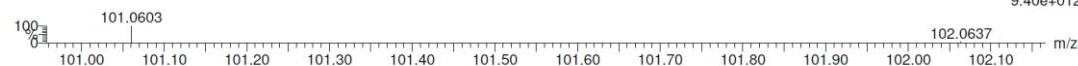

|          |            |     |     |      |       |      |          |          |  |
|----------|------------|-----|-----|------|-------|------|----------|----------|--|
| Minimum: |            |     |     | -1.5 |       |      |          |          |  |
| Maximum: |            | 5.0 | 5.0 | 50.0 |       |      |          |          |  |
| Mass     | Calc. Mass | mDa | PPM | DBE  | i-FIT | Norm | Conf (%) | Formula  |  |
| 101.0603 | 101.0603   | 0.0 | 0.0 | 1.5  | 82.1  | n/a  | n/a      | C5 H9 O2 |  |

· N-Benzyl-1-phenylmethanimine (MH<sup>+</sup>)

### Elemental Composition Report

Page 1

#### Single Mass Analysis

Tolerance = 5.0 PPM / DBE: min = -1.5, max = 50.0

Element prediction: Off

Number of isotope peaks used for i-FIT = 3

Monoisotopic Mass, Even Electron Ions

198 formula(e) evaluated with 1 results within limits (up to 50 best isotopic matches for each mass)

Elements Used:

C: 0-40 H: 0-40 N: 0-5 O: 0-6 Na: 0-1

MO-1558

PAT230524-94425-1 (0.037) Is (1.00,1.00) C14H14N

1: TOF MS ES+  
8.52e+012

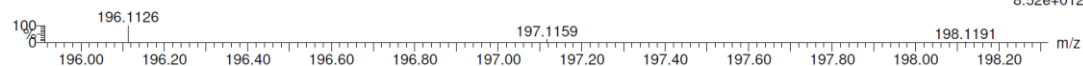

|          |            |     |     |      |       |      |          |           |  |
|----------|------------|-----|-----|------|-------|------|----------|-----------|--|
| Minimum: |            |     |     | -1.5 |       |      |          |           |  |
| Maximum: |            | 5.0 | 5.0 | 50.0 |       |      |          |           |  |
| Mass     | Calc. Mass | mDa | PPM | DBE  | i-FIT | Norm | Conf (%) | Formula   |  |
| 196.1126 | 196.1126   | 0.0 | 0.0 | 8.5  | 40.0  | n/a  | n/a      | C14 H14 N |  |

· Phenylmethanimine (MH<sup>+</sup>)

### Elemental Composition Report

Page 1

#### Single Mass Analysis

Tolerance = 5.0 PPM / DBE: min = -1.5, max = 50.0

Element prediction: Off

Number of isotope peaks used for i-FIT = 3

Monoisotopic Mass, Even Electron Ions

78 formula(e) evaluated with 1 results within limits (up to 50 best isotopic matches for each mass)

Elements Used:

C: 0-40 H: 0-40 N: 0-5 O: 0-6 Na: 0-1

MO-1558

PAT230524-94425-1 (0.037) Is (1.00,1.00) C7H8N

1: TOF MS ES+  
9.21e+012

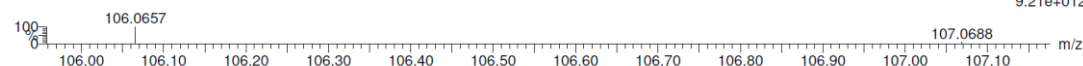

|          |            |     |     |      |       |      |          |         |  |
|----------|------------|-----|-----|------|-------|------|----------|---------|--|
| Minimum: |            |     |     | -1.5 |       |      |          |         |  |
| Maximum: |            | 5.0 | 5.0 | 50.0 |       |      |          |         |  |
| Mass     | Calc. Mass | mDa | PPM | DBE  | i-FIT | Norm | Conf (%) | Formula |  |
| 106.0657 | 106.0657   | 0.0 | 0.0 | 4.5  | 81.7  | n/a  | n/a      | C7 H8 N |  |



· Phenol (MH<sup>+</sup>)

### Elemental Composition Report

Page 1

#### Single Mass Analysis

Tolerance = 5.0 PPM / DBE: min = -1.5, max = 50.0

Element prediction: Off

Number of isotope peaks used for i-FIT = 3

Monoisotopic Mass, Even Electron Ions

63 formula(e) evaluated with 1 results within limits (up to 50 best isotopic matches for each mass)

Elements Used:

C: 0-40 H: 0-40 N: 0-5 O: 0-6 Na: 0-1

MO-1558

PAT230524-94425-1 (0.037) Is (1.00,1.00) C6H7O

1: TOF MS ES+  
9.33e+012

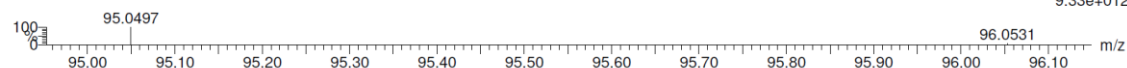

Minimum: -1.5  
Maximum: 5.0 5.0 50.0

| Mass    | Calc. Mass | mDa | PPM | DBE | i-FIT | Norm | Conf (%) | Formula |
|---------|------------|-----|-----|-----|-------|------|----------|---------|
| 95.0497 | 95.0497    | 0.0 | 0.0 | 3.5 | 81.7  | n/a  | n/a      | C6 H7 O |

· 2,2-Dimethylpropaneperoxoic acid (perpivalic acid) (MH<sup>+</sup>)

### Elemental Composition Report

Page 1

#### Single Mass Analysis

Tolerance = 5.0 PPM / DBE: min = -1.5, max = 50.0

Element prediction: Off

Number of isotope peaks used for i-FIT = 3

Monoisotopic Mass, Even Electron Ions

100 formula(e) evaluated with 1 results within limits (up to 50 best isotopic matches for each mass)

Elements Used:

C: 0-40 H: 0-40 N: 0-5 O: 0-6 Na: 0-1

MO-1558

PAT230524-94425-1 (0.037) Is (1.00,1.00) C5H11O3

1: TOF MS ES+  
9.38e+012

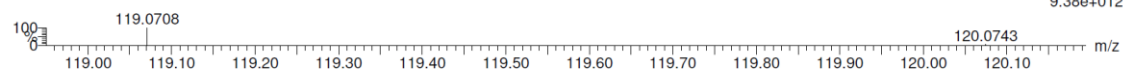

Minimum: -1.5  
Maximum: 5.0 5.0 50.0

| Mass     | Calc. Mass | mDa | PPM | DBE | i-FIT | Norm | Conf (%) | Formula   |
|----------|------------|-----|-----|-----|-------|------|----------|-----------|
| 119.0708 | 119.0708   | 0.0 | 0.0 | 0.5 | 82.7  | n/a  | n/a      | C5 H11 O3 |

12. Fig. S1

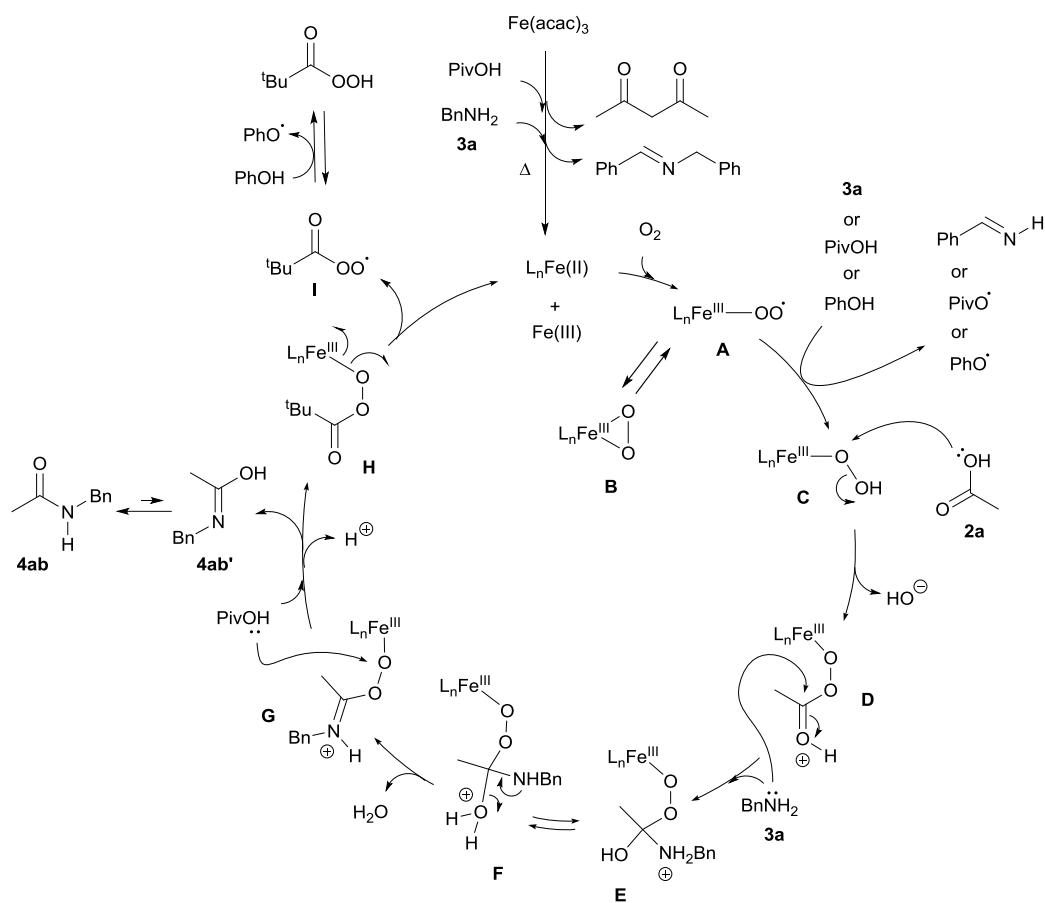

**Fig. S2.** A mechanistic proposal for the iron-catalyzed aminolysis of acetic acid **2a** in the presence of dioxygen.

13. Fig. S2

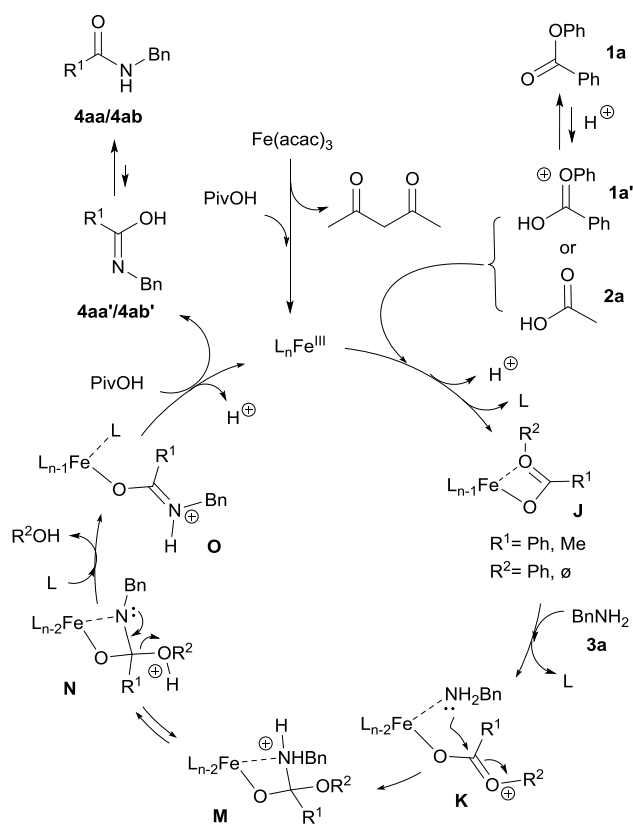

**Fig. S2.** A proposal for the subsidiary mechanism that explains the amidation of ester **1a** and acid **2a** with benzylamine **3a** under argon.

Note: Amides **4aa** and **4ab** were obtained, although with significantly inferior yields, when the reaction had been performed under argon (Table S1). Therefore we hypothesized that a slower, less productive complementary mechanism was taking place in the absence of oxygen. Fig. S3 shows our proposal for this underlying mechanism. Protonolysis of  $\text{Fe}(\text{acac})_3$  by pivalic acid would generate iron(III) pivalate species prone to undergo ligand exchange with **1a'** or **2a**, thus forming intermediate **J**. A second ligand exchange with amine **3a** to generate **K** would trigger an intramolecular condensation through nucleophilic addition (**M**), prototropy (**N**) and release of  $\text{R}^2\text{OH}$ . Protonolysis/ligand exchange at the resulting intermediate **O** would release  $\alpha$ -hydroxyimines **4aa'/4ab'** and their tautomers **4aa/4ab** while restarting the catalytic cycle.

## 14. References

- [1] A. M. Simion, I. Hashimoto, Y. Mitoma, N. Egashira, C. Simion, *Synth. Commun.* **2012**, *42*, 921-931.
- [2] L. Zhang, G. Zhang, M. Zhang, J. Cheng, *J. Org. Chem.* **2010**, *75*, 7472-7474.
- [3] J. M. Álvarez-Calero, Z. D. Jorge, G. M. Massanet, *Org. Lett.* **2016**, *18*, 6344-6347.
- [4] M. Zhang, S. Zhang, G. Zhang, F. Chen, J. Cheng, *Tetrahedron Lett.* **2011**, *52*, 2480-2483.
- [5] J. -J. Meng, M. Gao, Y. -P. Wei, W. -Q. Zhang, *Chem. Asian J.* **2012**, *7*, 872-875.
- [6] A. Groves, J. I. Martínez, J. J. Smith, H. W. Lam, *Chem. Eur. J.* **2018**, *24*, 13432-13436.
- [7] F. Dalu, M. A. Scorciapino, C. Cara, A. Luridiana, A. Musinu, M. Casu, F. Secci, C. Cannas, *Green Chem.* **2018**, *20*, 375-381.
- [8] E. Howard, N. Guzzardi, V. G. Tsanova, A. Stika, B. Patel, *Eur. J. Org. Chem.* **2018**, *6*, 794-797.
- [9] D. C. Leustra, D. T. Nguyen, J. Mecinovic, *Tetrahedron* **2015**, *71*, 5547-5553.
- [10] Z. Liu, X. Zhang, J. Li, F. Li, C. Li, X. Jia, J. Li, *Org. Lett.* **2016**, *18*, 4052-4055.
- [11] N. Schröder, J. Wencel-Delord, F. Glorius, *J. Am. Chem. Soc.* **2012**, *134*, 8298-8301.
- [12] H. Kondo, K. Itami, J. Yamaguchi, *Chem. Sci.* **2017**, *8*, 3799-3803.
- [13] G. Cheng, W. Lv, C. Kuai, S. Wen, S. Xiao, *Chem. Commun.* **2018**, *54*, 1726-1729.
- [14] A. Rolfe, D. A. Probst, K. A. Volp, I. Omar, D. L. Flynn, P. R. Hanson, *J. Org. Chem.* **2008**, *73*, 8785-8790.
- [15] V. Kumar, S. J. Connon, *Chem. Commun.* **2017**, *53*, 10212-10215.
- [16] Wong, V. H. L.; White, A. J. P.; Hor, T. S.; Hii, K. K. *Adv. Synth. Catal.* **2015**, *357*, 3943-3948.
- [17] P. Drouhin, T. E. Hurst, A. C. Whitwood, J. K. Taylor, *Tetrahedron* **2015**, *71*, 7124-7136.
- [18] A. Mishra, S. Singh, V. Srivastava, *Asian J. Org. Chem.* **2018**, *7*, 1600-1604.
- [19] S. Sharif, J. Day, H. N. Hunter, Y. Lu, D. Mitchell, M. J. Rodriguez, M. G. Organ, *J. Am. Chem. Soc.* **2017**, *139*, 18436-18439.
- [20] L. Huang, H. Guo, L. Pau, C. Xie, *Eur. J. Org. Chem.* **2013**, *17*, 6027-6031.
- [21] Zarecki, A. P.; Kolanowski, J. L.; Markiewicz, W. T. *Molecules* **2020**, *25*, 1761-1769.
- [22] Y. Liu, M. Achtenghagen, R. Liu, M. Szostak, *Org. Biomol. Chem.* **2018**, *16*, 1322-1329.
- [23] D. C. Braddock, P. D. Lickiss, B. C. Rowley, T. Purnomo, G. Santhakumar, S. J. Fussell, *Org. Lett.* **2018**, *20*, 950-953.
- [24] I. Iriepa, A. I. Madrid, E. Gálvez, J. Bellanato, *J. Molec. Struct.* **2006**, *787*, 8-13.
- [25] W. -J. Li, F. -F. Zhao, M. -W. Ding, *Synlett* **2011**, 265-267.
- [26] K. Kobayashi, Y. Chikazawa, *Tetrahedron* **2016**, *72*, 5100-5105.
- [27] Y. Yasui, S. Tsuchida, H. Miyabe, Y. Takemoto, *J. Org. Chem.* **2007**, *72*, 5898-5900.
- [28] R. S. L. Chapman, R. Lawrence, J. M. J. Williams, S. D. Bull, *Org. Lett.* **2017**, *19*, 4908-4911.
- [29] X. Mo, T. D. R. Morgan, H. T. Ang, D. G. Hall, *J. Am. Chem. Soc.* **2018**, *140*, 5264-5271.
- [30] S. C. Ghosh, S. H. Hong, *Eur. J. Org. Chem.* **2010**, 4266-4270.
- [31] X. Jiang, P. Boehm, J. F. Hartwig, *J. Am. Chem. Soc.* **2018**, *140*, 1239-1242.

- [32] S. Porto, J. M. Seco, J. F. Espinosa, E. Quiñoá, R. Riguera, *J. Org. Chem.* **2008**, *73*, 5714-5722.
- [33] G. C. Y. Choo, H. Miyamura, S. Kobayashi, *Chem. Sci.* **2015**, *6*, 1719-1721.
- [34] A. R. Prosser, J. E. Banning, M. Rubina, M. Rubin, *Org. Lett.* **2010**, *12*, 3698-3971.
- [35] J. Das, D. Banerjee, *J. Org. Chem.* **2018**, *83*, 3378-3384.
- [36] D. D. Sanz Sharley, J. M. J. Williams, *Chem. Commun.* **2017**, *53*, 2020-2023.
- [37] R. B. Sonawane, N. K. Rasal, S. V. Jagtap, *Org. Lett.* **2017**, *19*, 2078-2081.
- [38] R. García, J. M. Seco, S. A. Vázquez, E. Quiñoá, R. Riguera, *J. Org. Chem.* **2006**, *71*, 1119-1130.
- [39] S. Hanada, A. Yuasa, H. Kuroiwa, Y. Motoyama, H. Nagashima, *Eur. J. Org. Chem.* **2010**, 1021-1025.
- [40] J. P. Weyrauch, A. S. K. Hashmi, A. Schuster, T. Hengst, S. Schetter, A. Littmann, M. Rudolph, M. Hamzic, J. Visus, F. Rominger, W. Frey, J. W. Bats, *Chem. Eur. J.* **2010**, *16*, 956-963.
- [41] Q. -B. Zhang, P. -F. Yuan, L. -L. Kai, K. Liu, Y. -L. Ban, X. -Y. Wang, L. -Z. Wu, Q. Liu, *Org. Lett.* **2019**, *21*, 885-889.
- [42] R. J. Bergeron, J. S. McManis, *J. Org. Chem.* **1988**, *53*, 3108-3111.
- [43] A. Mekhalfia, R. Mutter, W. Heal, B. Chen, *Tetrahedron* **2006**, *62*, 5617-5625.
- [44] L. Zhu, L. Le, M. Yan, C. -T. Au, R. Qiu, N. Kambe, *J. Org. Chem.* **2019**, *84*, 5635-5644.
- [45] M. G. Vigorita, T. Previtiera, G. Saporito, R. Costa de Pasquale, C. Circosta, F. Occhiuto, *Farmaco, Ed. Sci.* **1984**, *39*, 403-413.
- [46] S. Fadel, Y. Hajbi, M. Khouili, S. Lazar, F. Suzenet, G. Guillaumet, *Beilstein J. Org. Chem.* **2014**, *10*, 282-286.
- [47] P. Mea, C. Mues, *Tetrahedron* **1988**, *44*, 6841-6853.
- [48] C. E. Rye, D. Barker, *J. Org. Chem.* **2011**, *76*, 6636-6648.
- [49] C. Ramalingan, Y. -T. Park, *J. Org. Chem.* **2007**, *72*, 4536-4538.
- [50] X. -Y. Liu, C. -M. Che, *Angew. Chem. Int. Ed.* **2008**, *47*, 3805-3810.
- [51] I. Shiina, Y. Kawakita, *Tetrahedron* **2004**, *60*, 4729-4733.
- [52] H. Takahata, T. Suzuki, M. Maruyama, K. Moriyama, M. Mozumi, T. Takamatsu, T. Yamazaki, *Tetrahedron* **1988**, *44*, 4777-4786.
- [53] S. Kasai, M. Kamaura, M. Kamata, K. Aso, H. Ogino, Y. Nakano, K. Watanabe, T. Kaisho, M. Tawada, Y. Nagisa, S. Takekawa, K. Kato, N. Suzuki, Y. Ishihara, *Bioorg. Med. Chem.* **2011**, *19*, 6261-6273.
- [54] M. D. Ganton, M. A. Kerr, *Org. Lett.*, **2005**, *7*, 4777-4779.
- [55] Kobeissi, M.; Cherry, K.; Jomaa, W. *Synth. Commun.* **2013**, *43*, 2955-2965.
- [56] Jiang, H.; Liu, B.; Li, Y.; Wang, A.; Huang, H. *Org. Lett.* **2011**, *13*, 1028-1031.
- [57] Simkó, D. C.; Elekes, P.; Pázmándi, V.; Novák, Z. *Org. Lett.* **2018**, *20*, 676-679.
- [58] Teo, Y. -C.; Yong, F. -F.; Ithnin, I. K.; Yio, S. -H. T.; Lin, Z. *Eur. J. Org. Chem.* **2015**, 515-524.
- [59] Debnath, P.; Baeten, M.; Lefèvre, N.; Van Daele, S.; Maes, B. U. W. *Adv. Synth. Catal.* **2015**, *357*, 197-209.

# 15. NMR Spectra

Phenyl benzoate

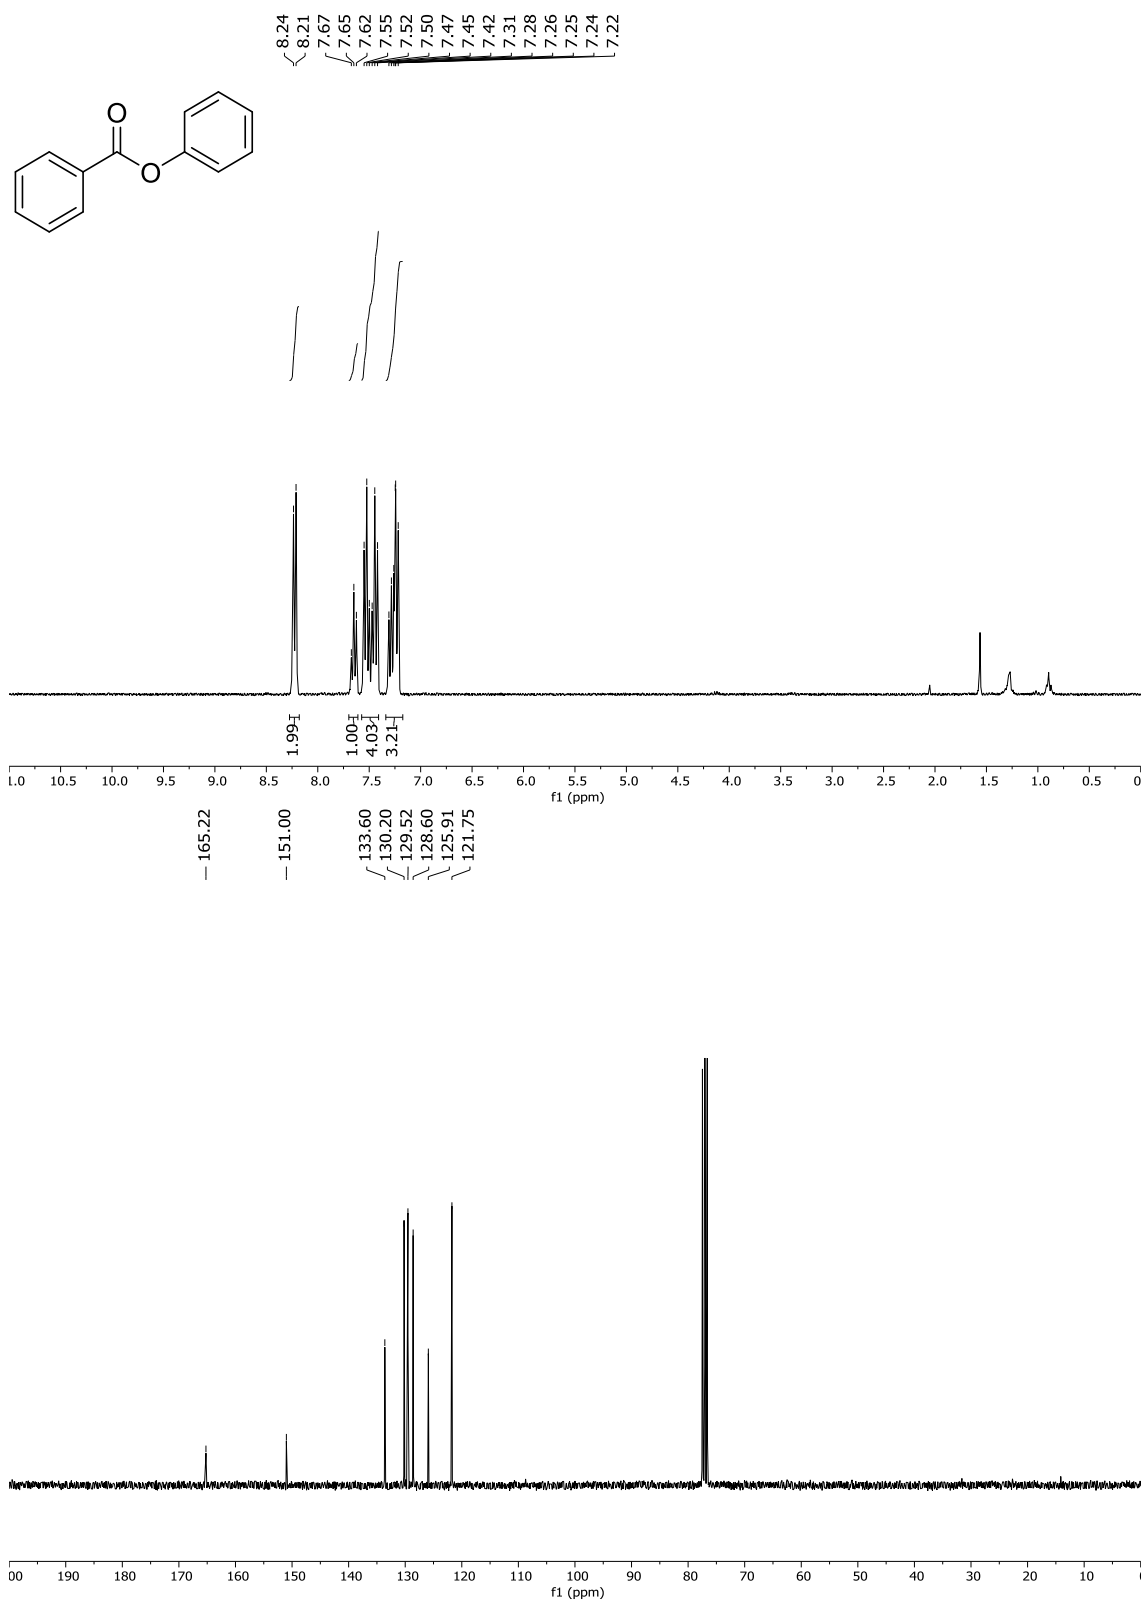

# Phenyl 2-phenylacetate

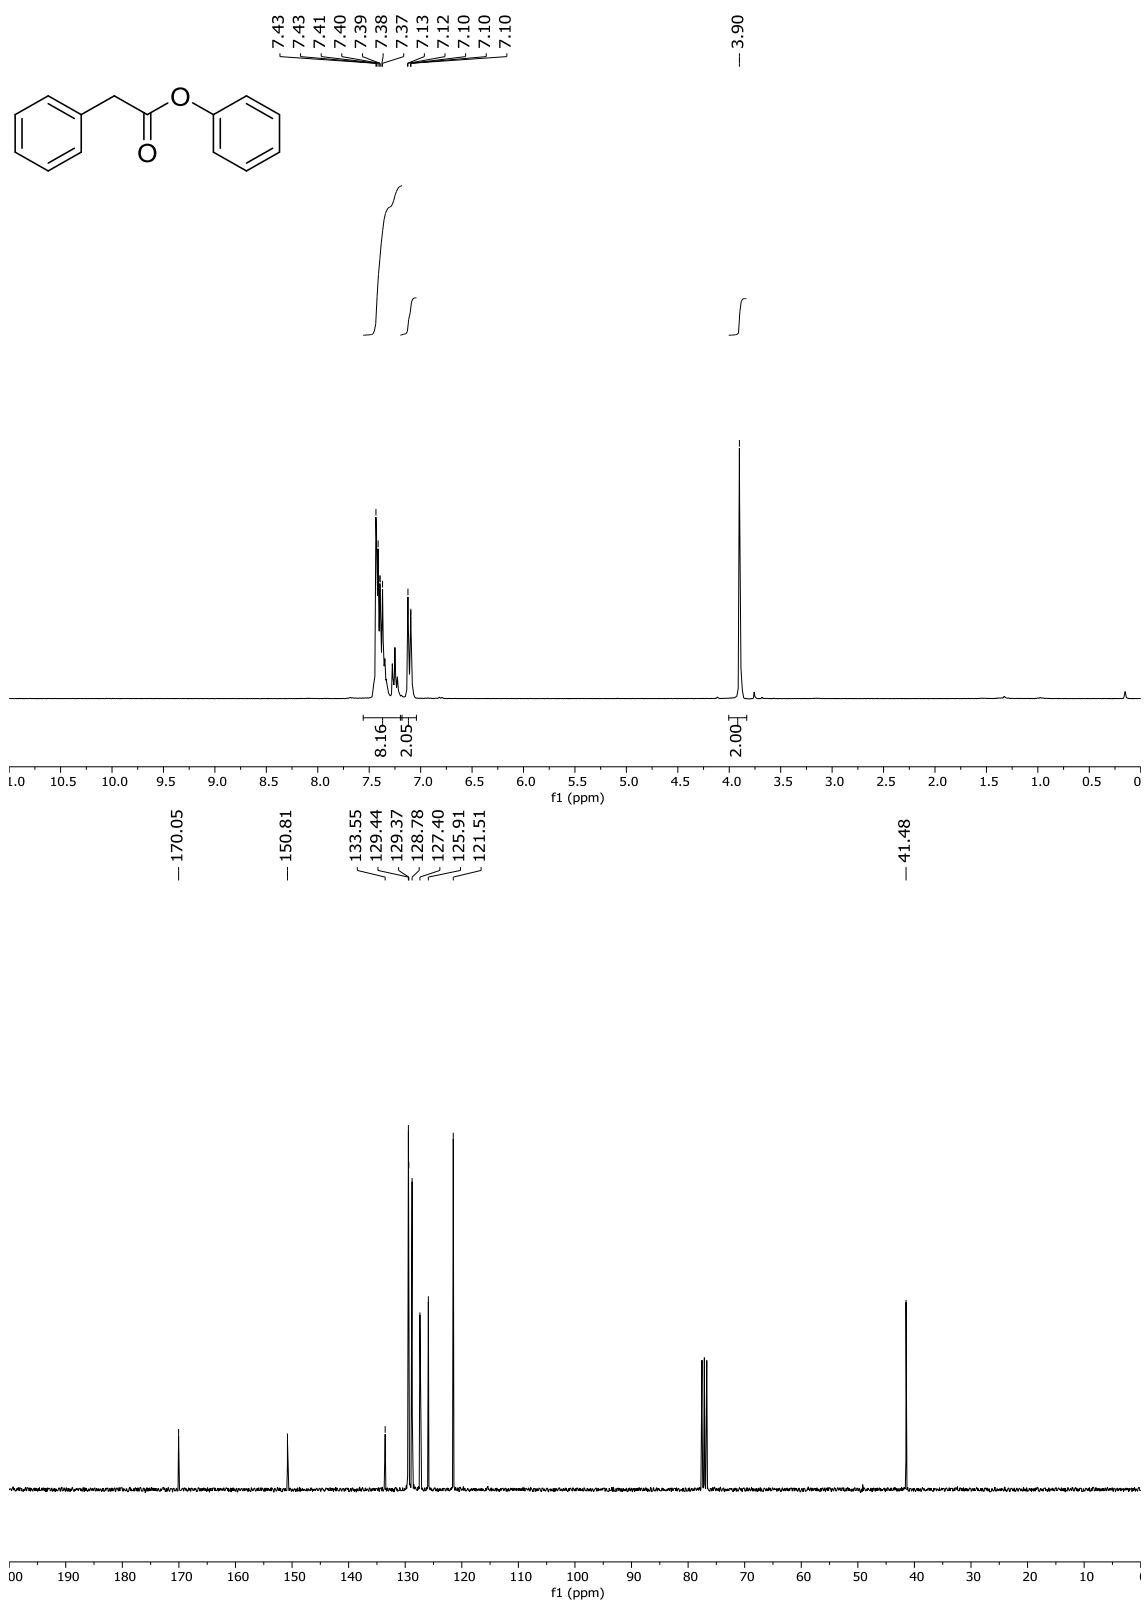

# Phenyl acetate

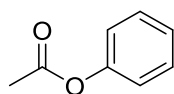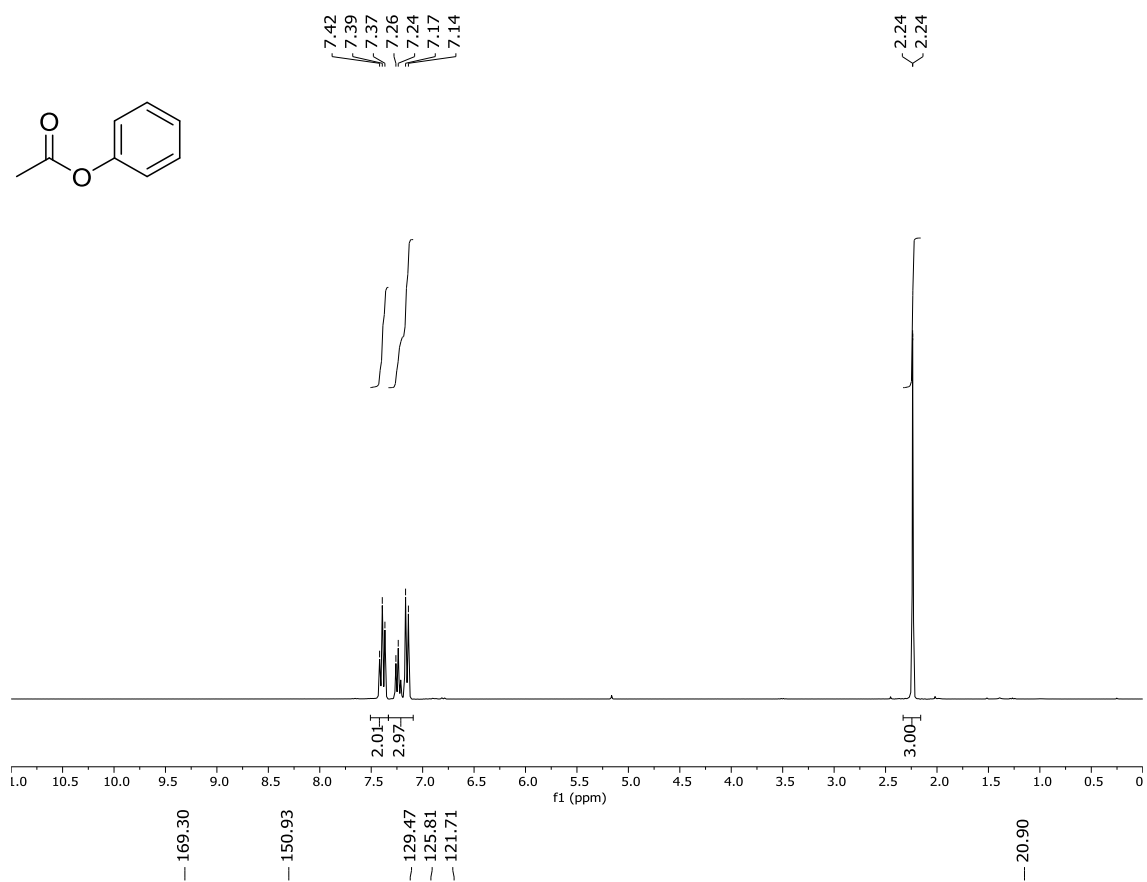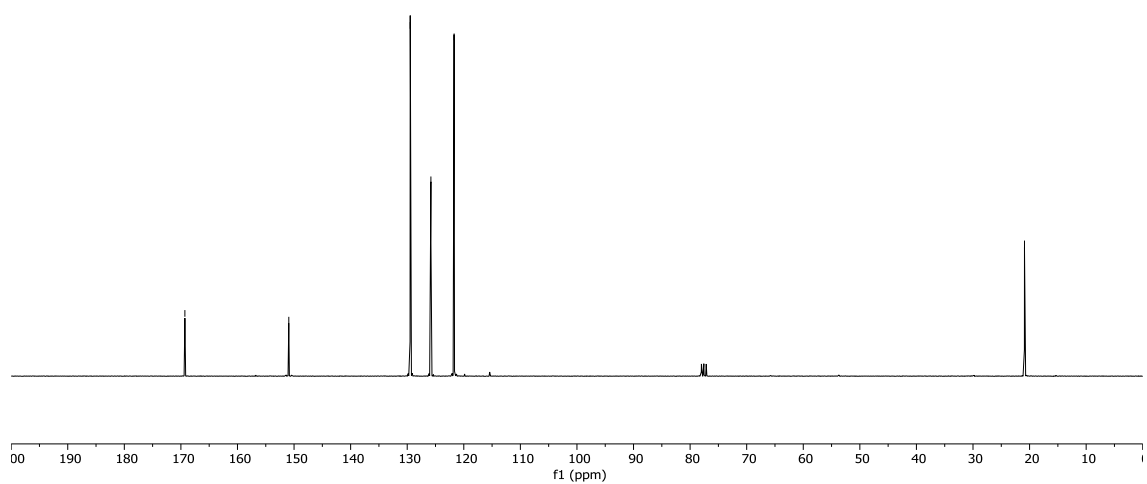



# Phenyl 4-(trifluoromethyl)benzoate

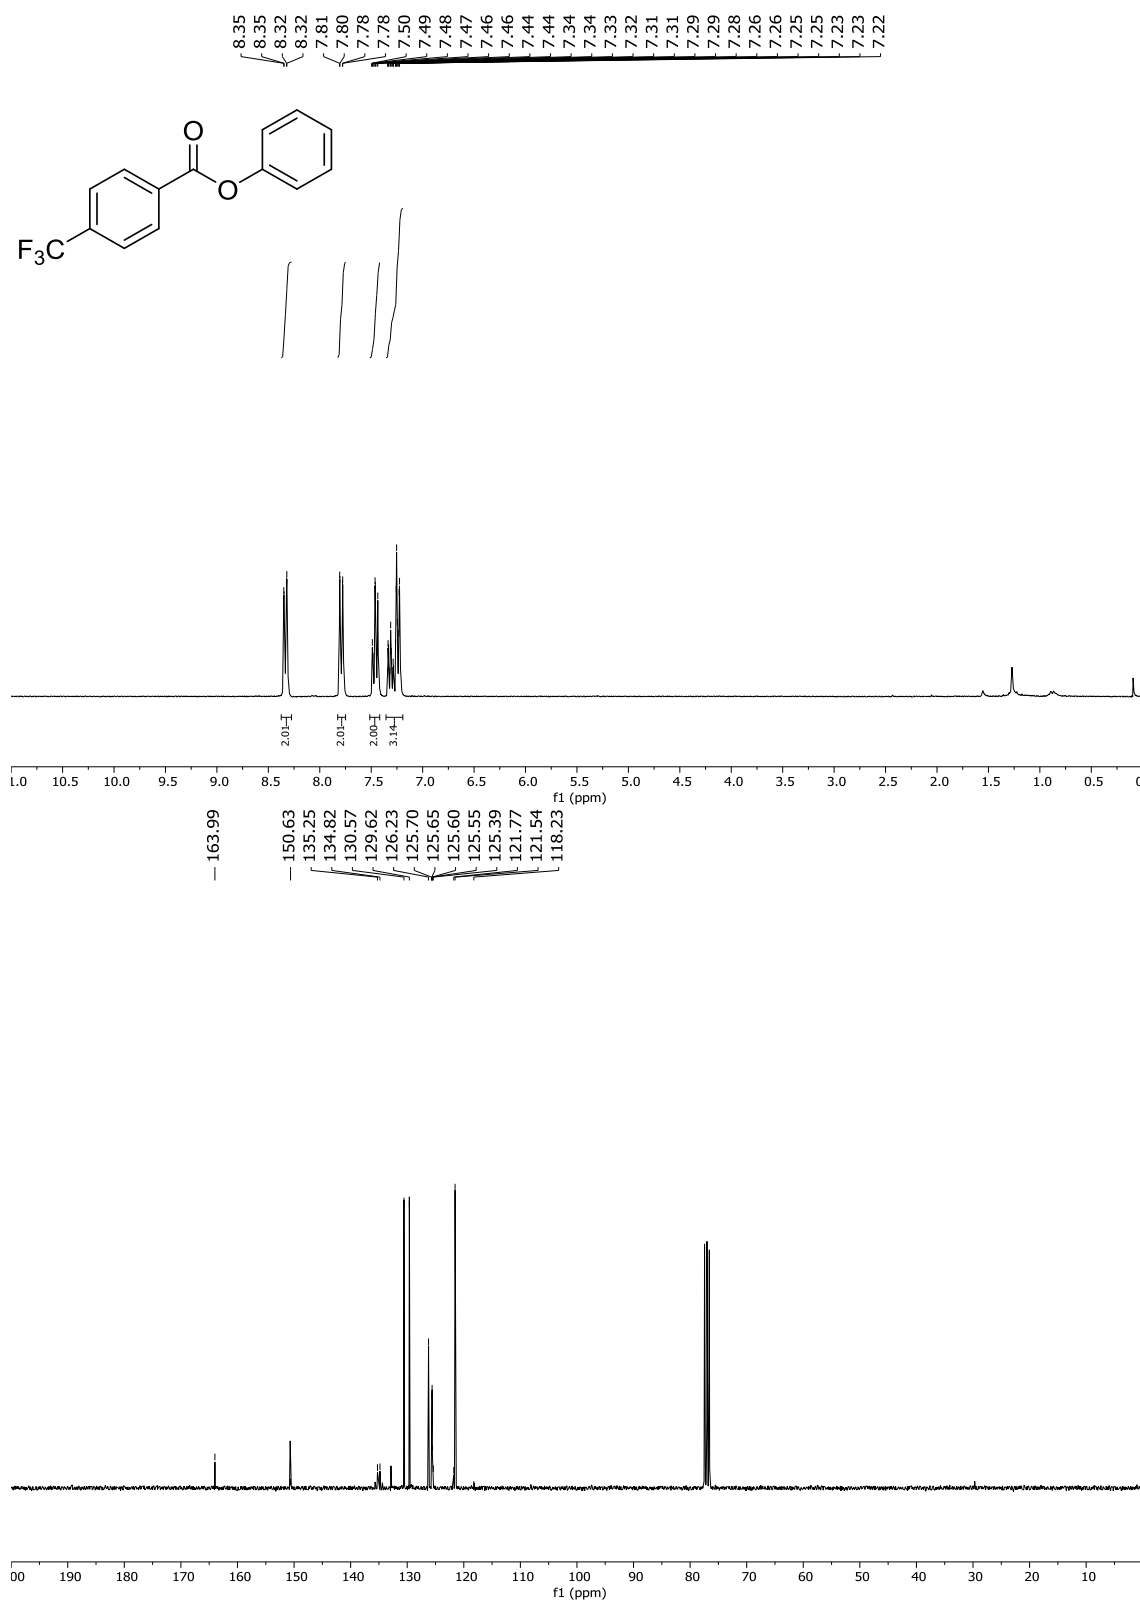

Phenyl 4-methoxy-2-methylbenzoate

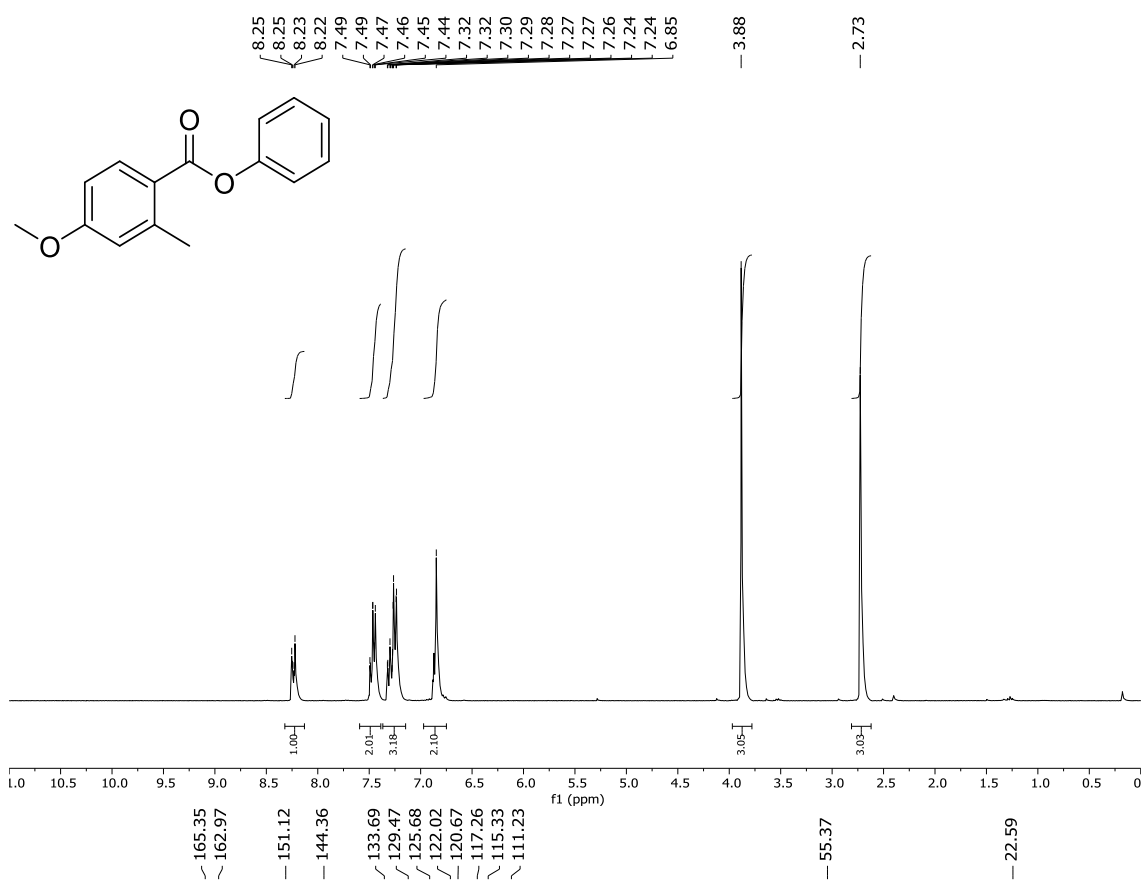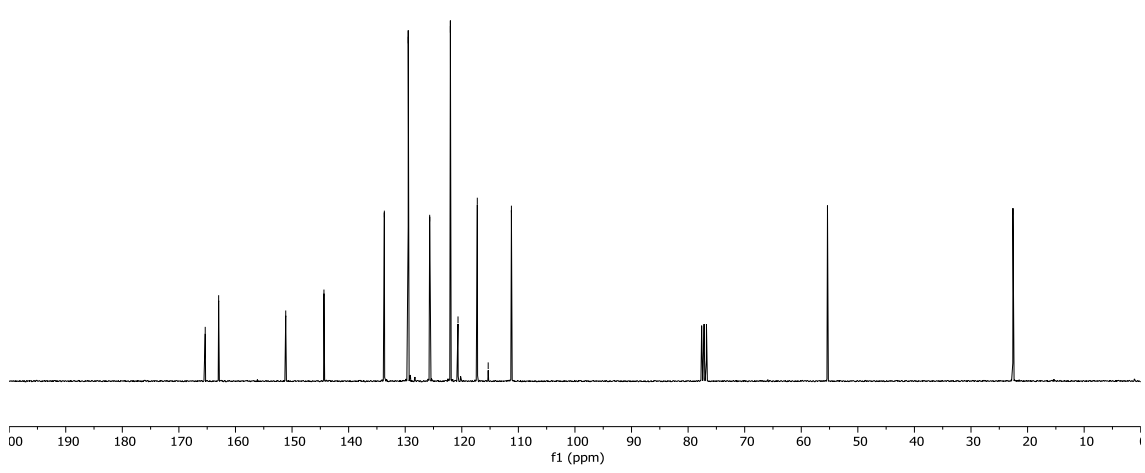

# Phenyl 3,4-dimethoxybenzoate

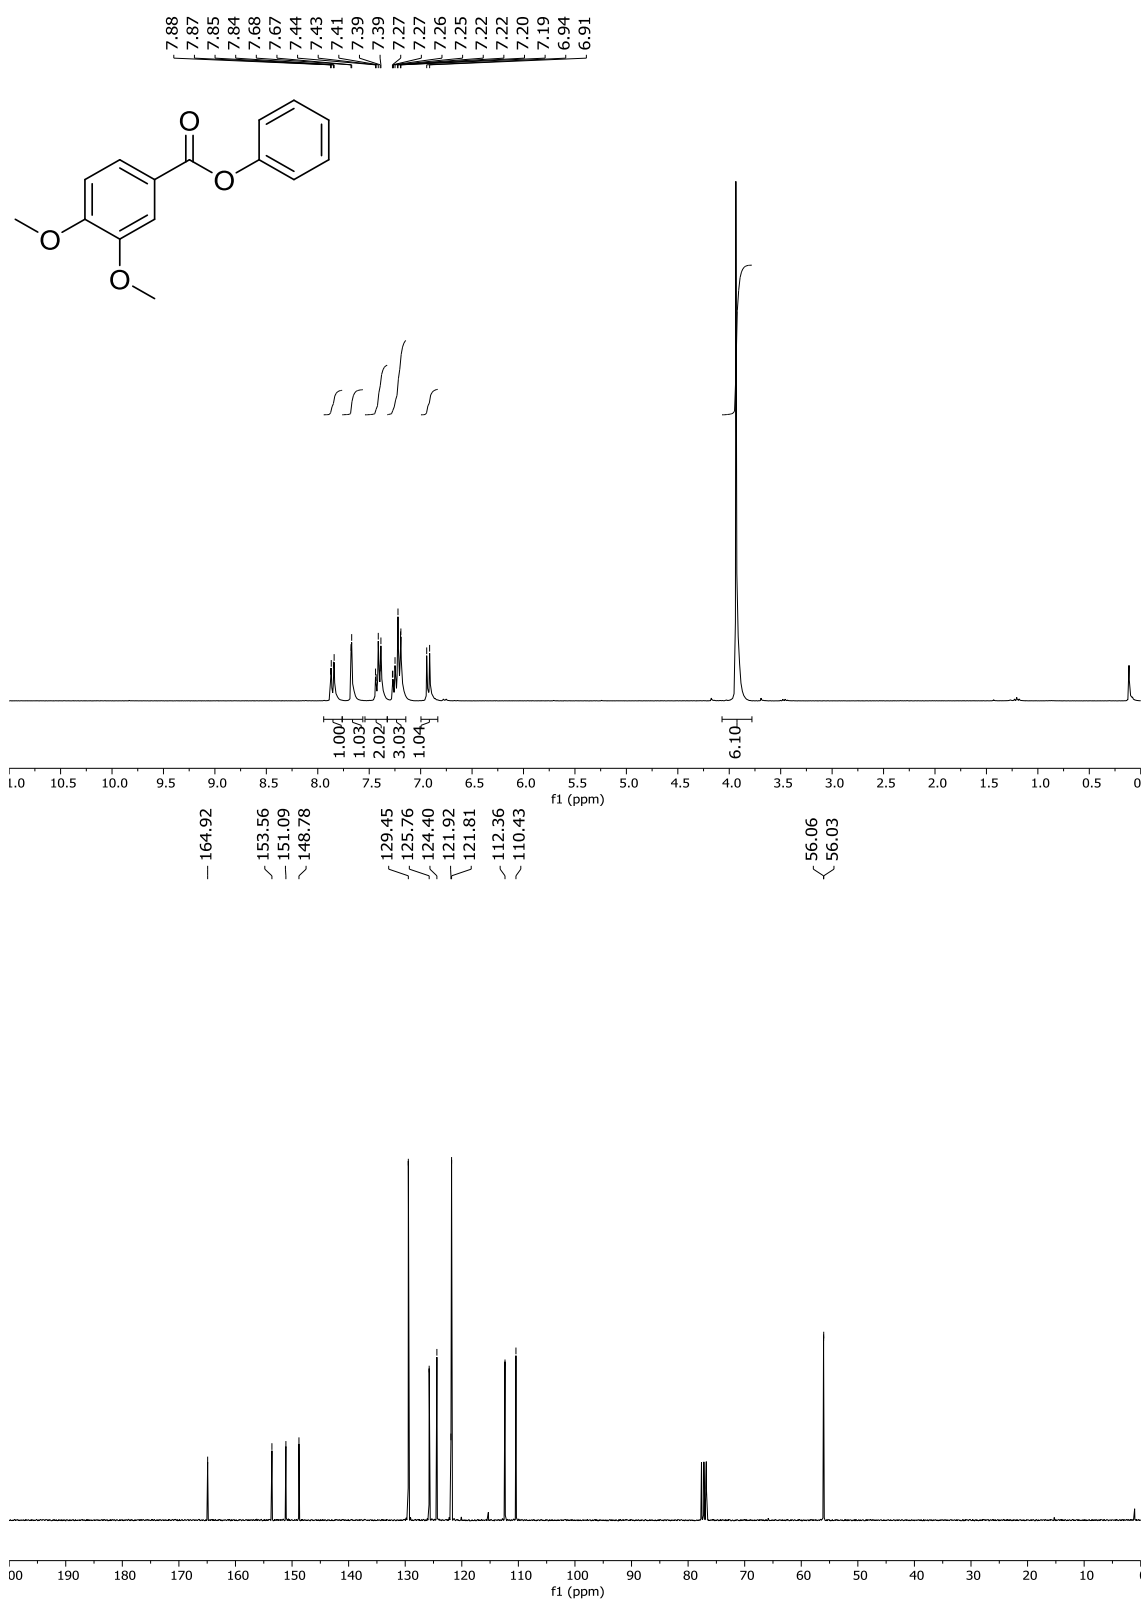

# Phenyl (S)-2-methoxy-2-phenylacetate

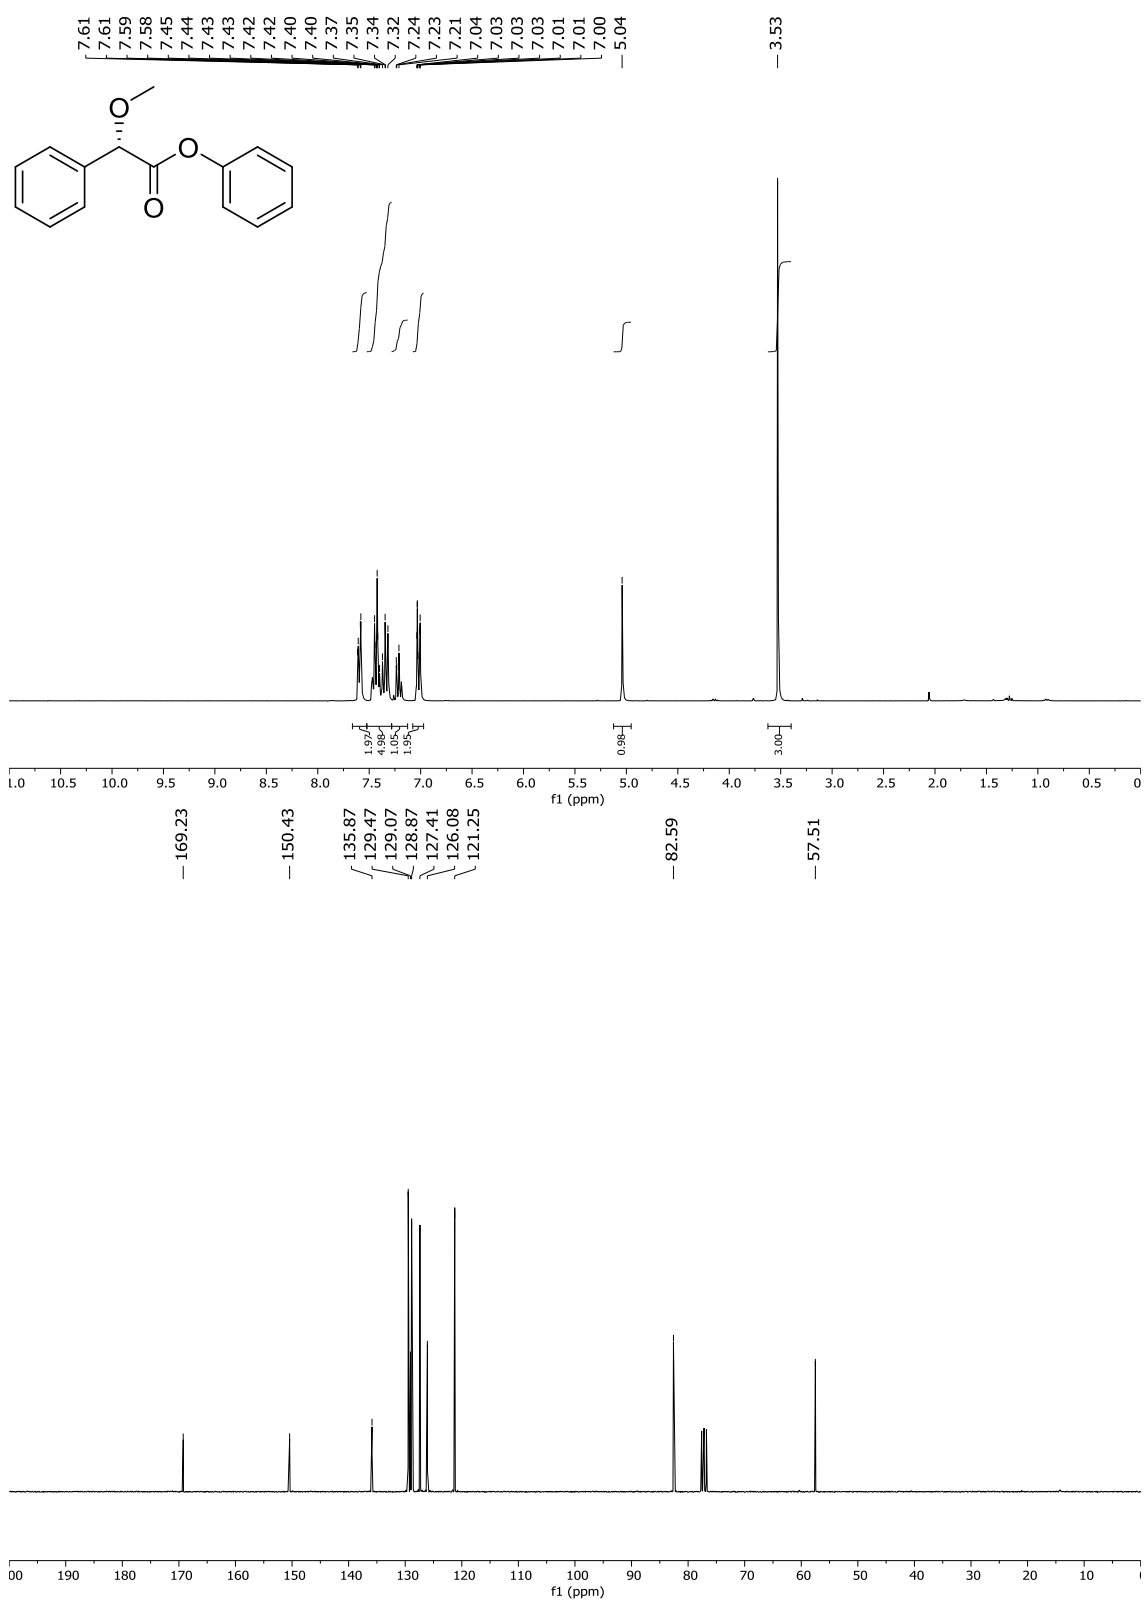

Phenyl tosyl-L-prolinate

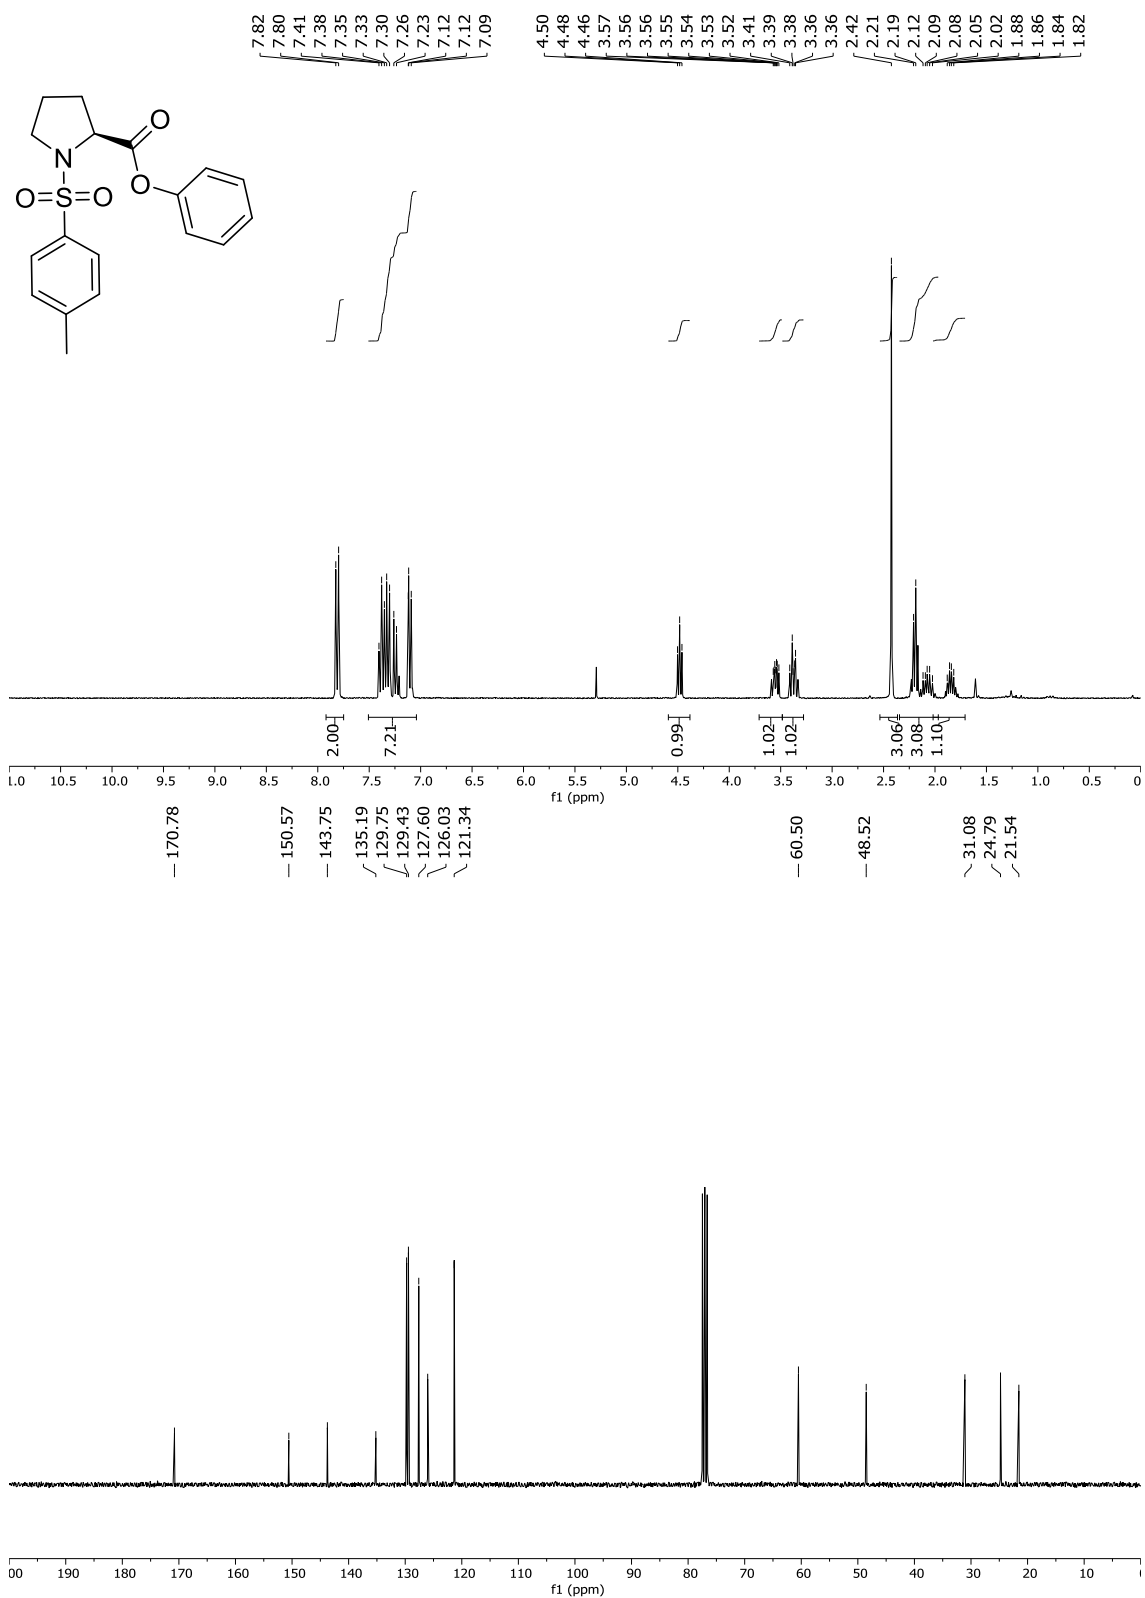

# N-Benzylbenzamide

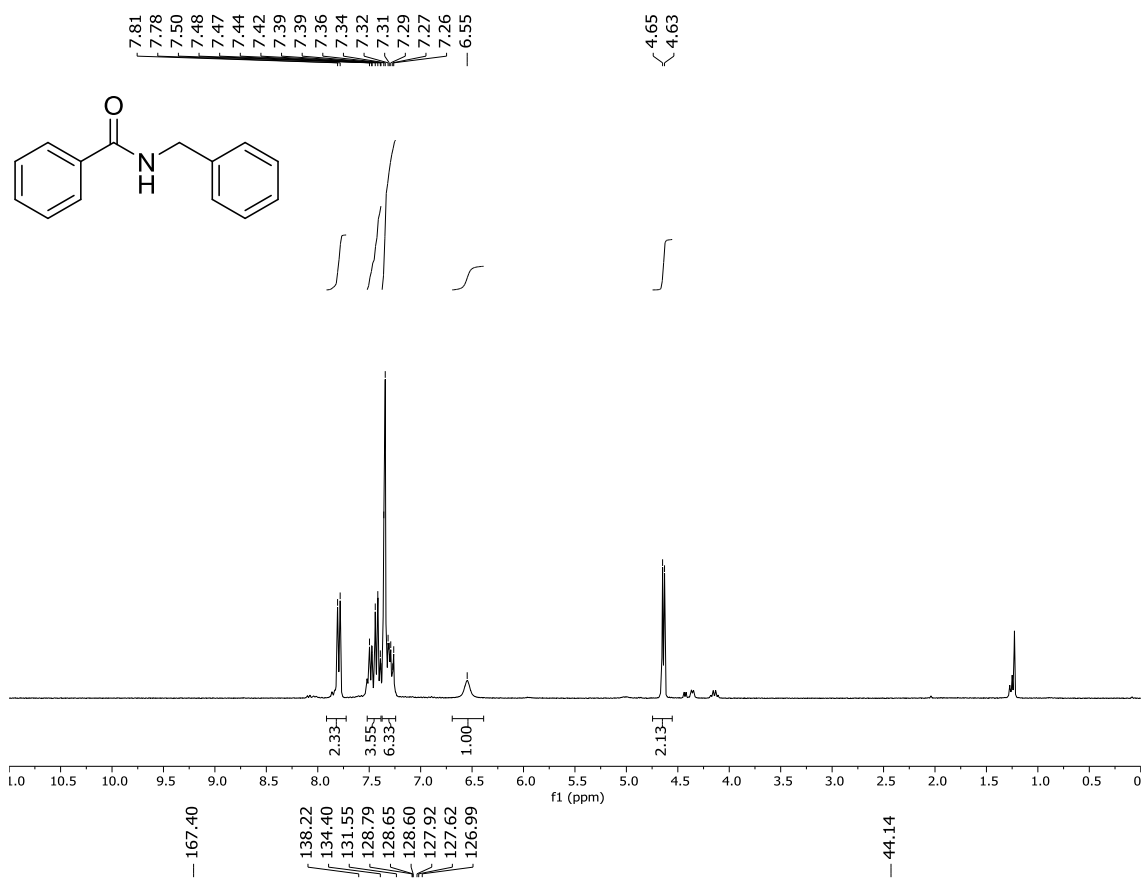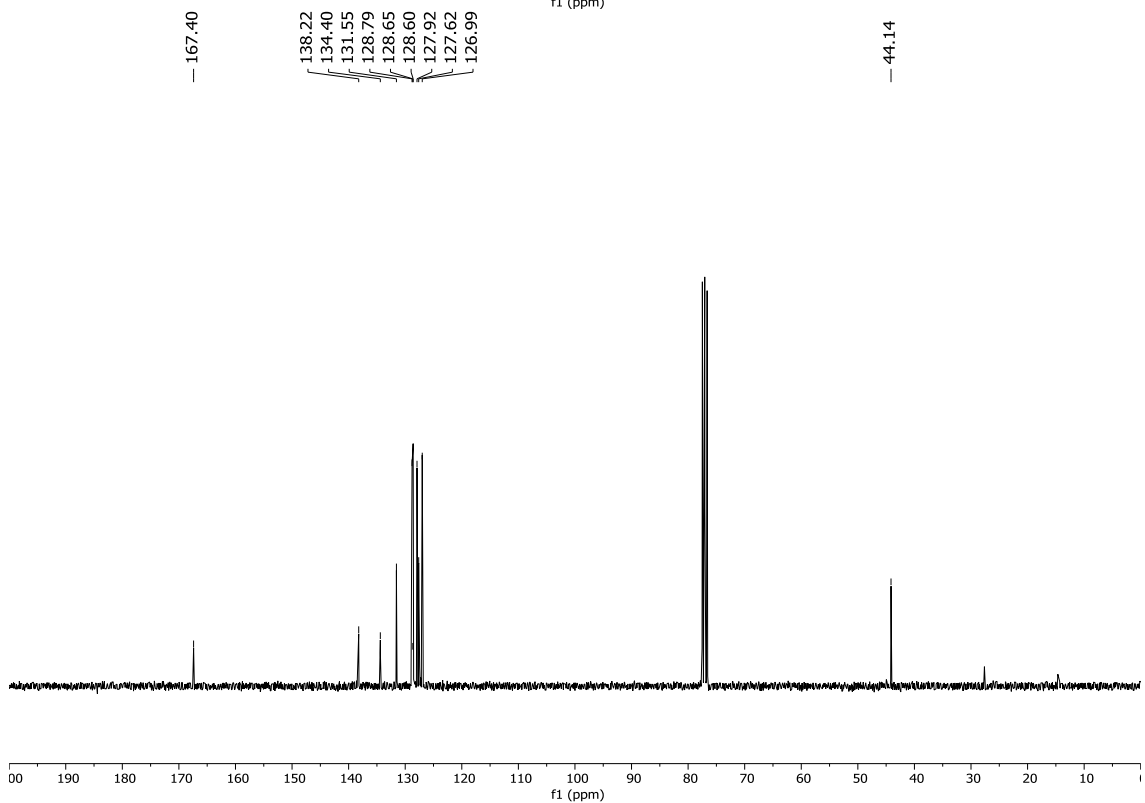

*N*-(2-Methoxybenzyl)benzamide

7.78  
7.78  
7.77  
7.76  
7.75  
7.75  
7.50  
7.50  
7.49  
7.48  
7.47  
7.46  
7.45  
7.45  
7.44  
7.43  
7.43  
7.42  
7.42  
7.41  
7.40  
7.39  
7.38  
7.38  
7.37  
7.36  
7.35  
7.35  
7.34  
7.34  
7.33  
7.31  
7.30  
7.28  
7.27  
7.26  
7.25  
7.25  
7.23  
7.23  
6.96  
6.96  
6.94  
6.93  
6.91  
6.91  
6.88  
6.88  
6.74  
4.65  
4.63  
4.44  
4.42  
3.88  
3.85

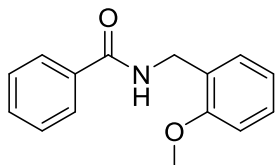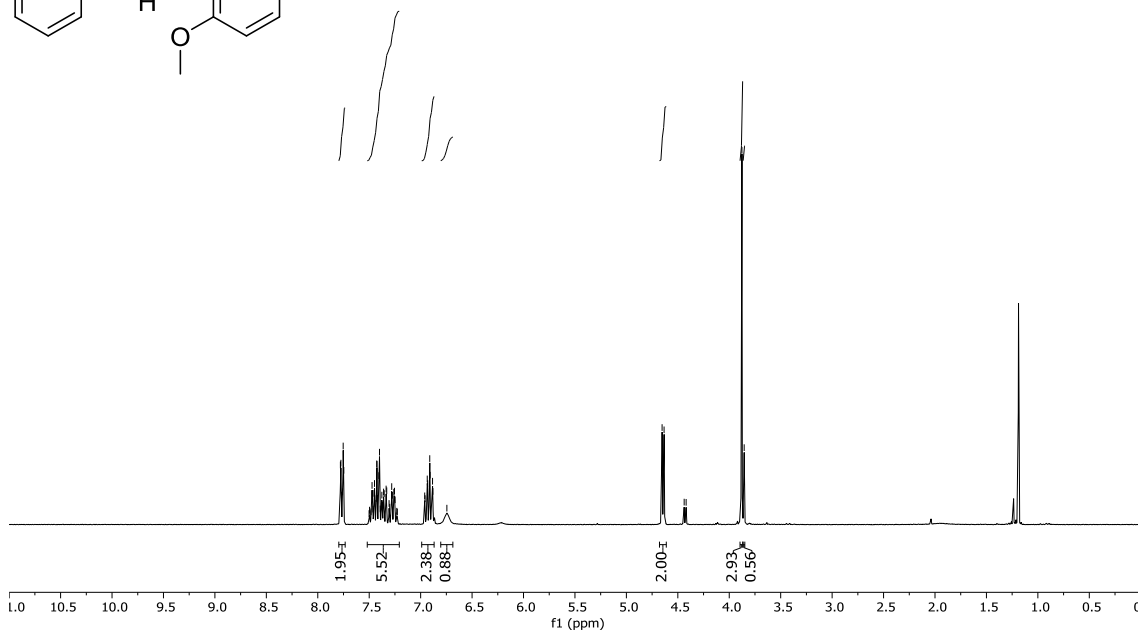

167.20  
157.64  
134.79  
131.31  
129.90  
129.64  
128.95  
128.73  
128.50  
126.97  
126.20  
120.79  
120.74  
110.41  
110.36  
55.42  
55.33  
39.99  
39.61  
27.57  
27.20

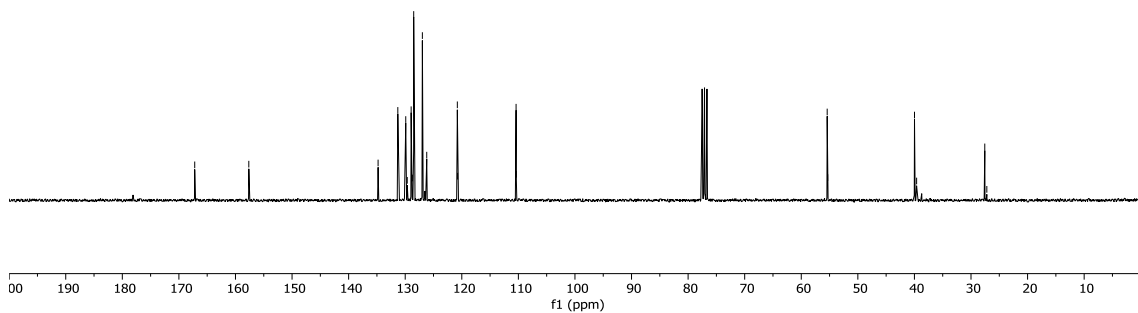

(S)-N-(1-Phenethyl)benzamide

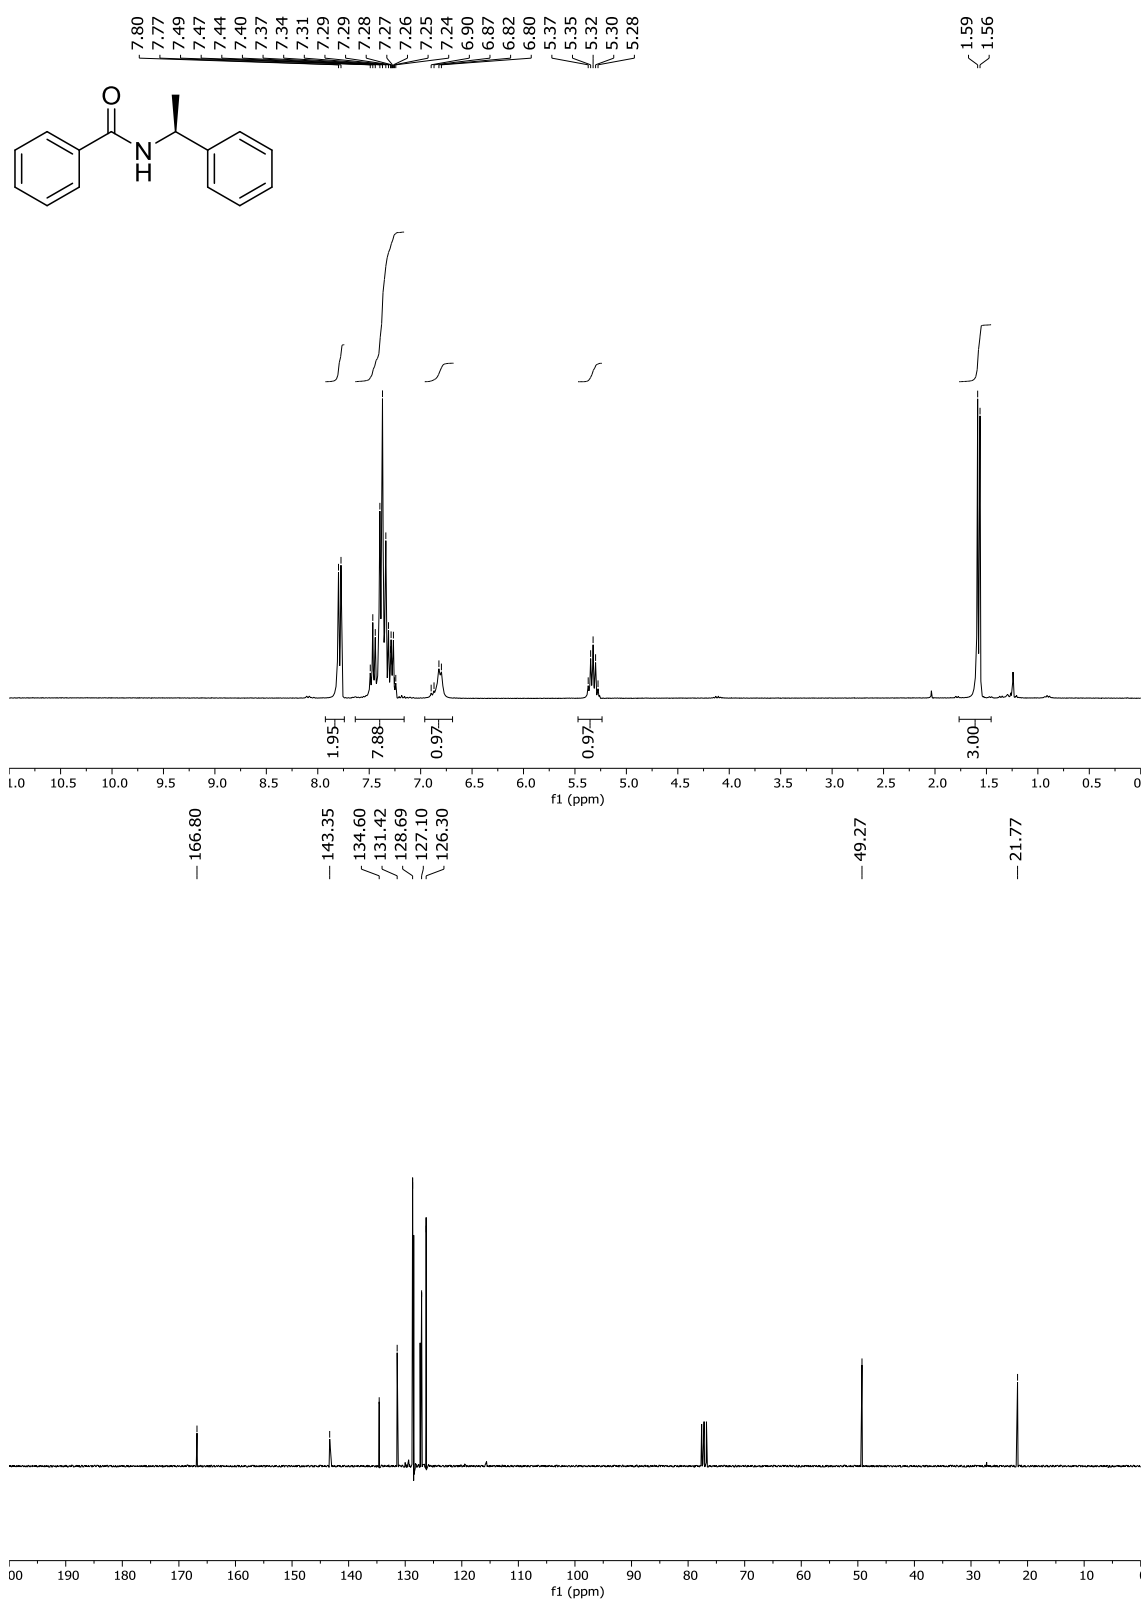



*N*-(3,4-Dimethoxyphenylethyl)benzamide

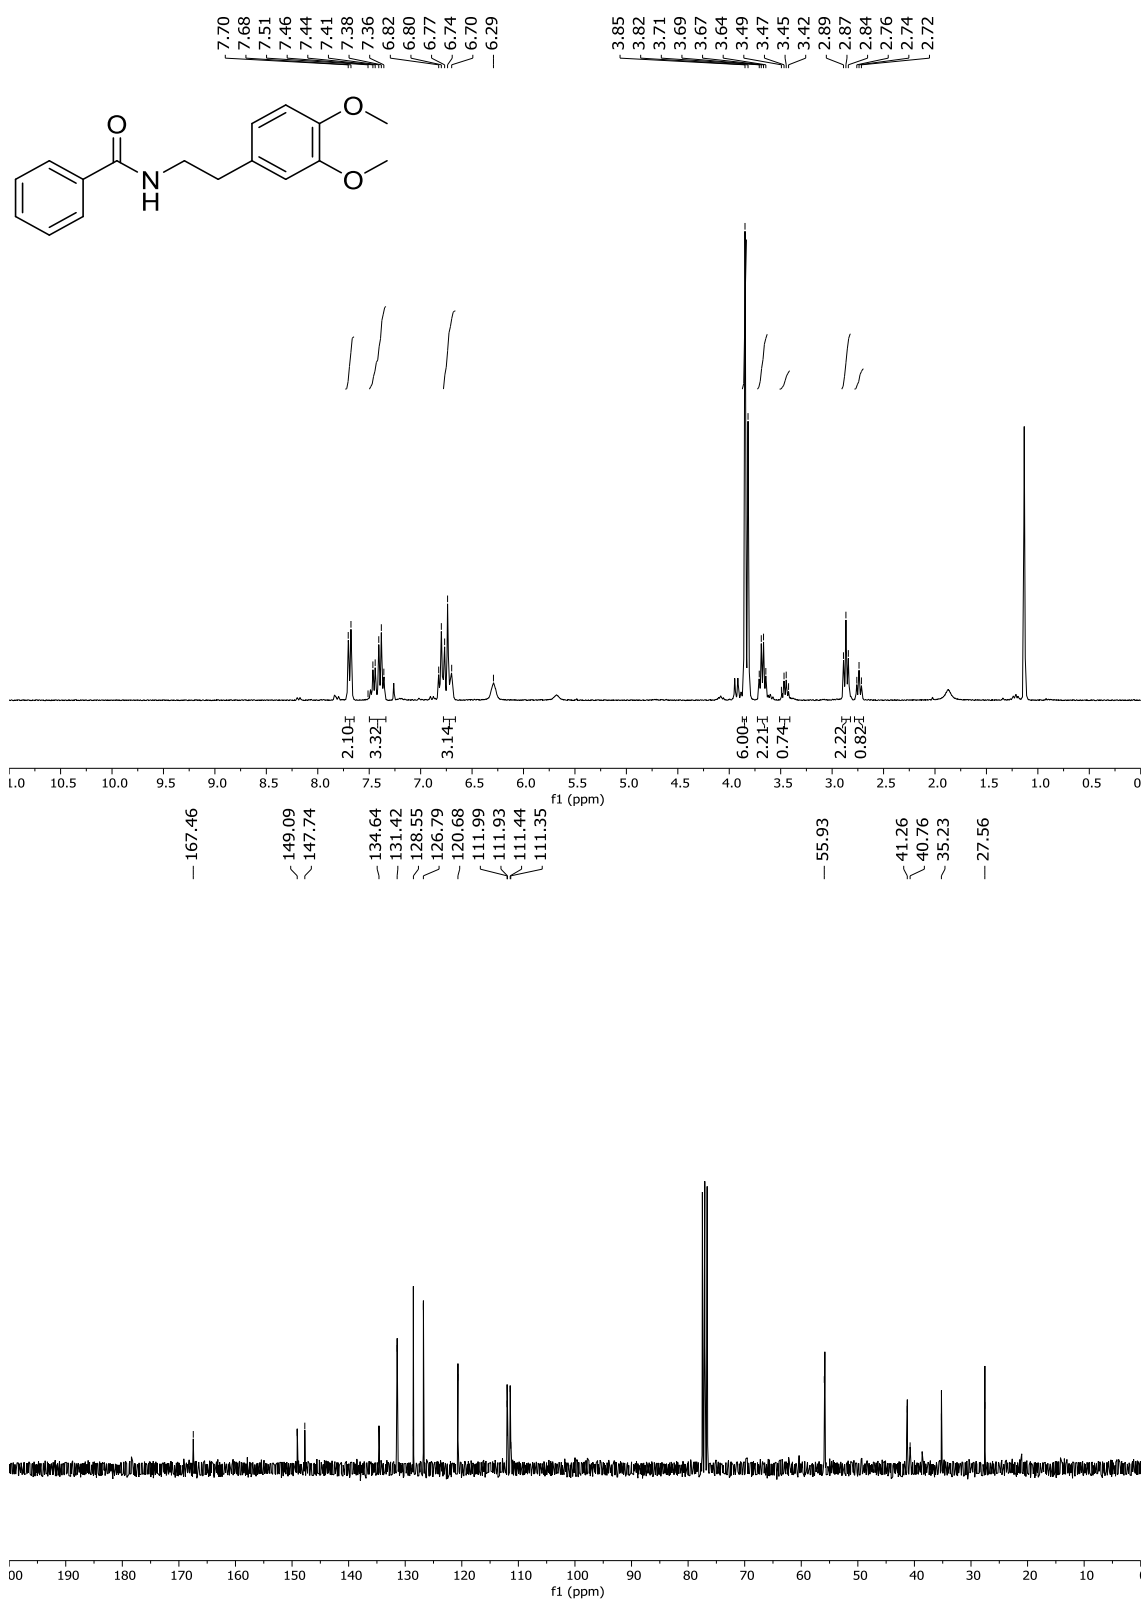

*N*-Butylbenzamide

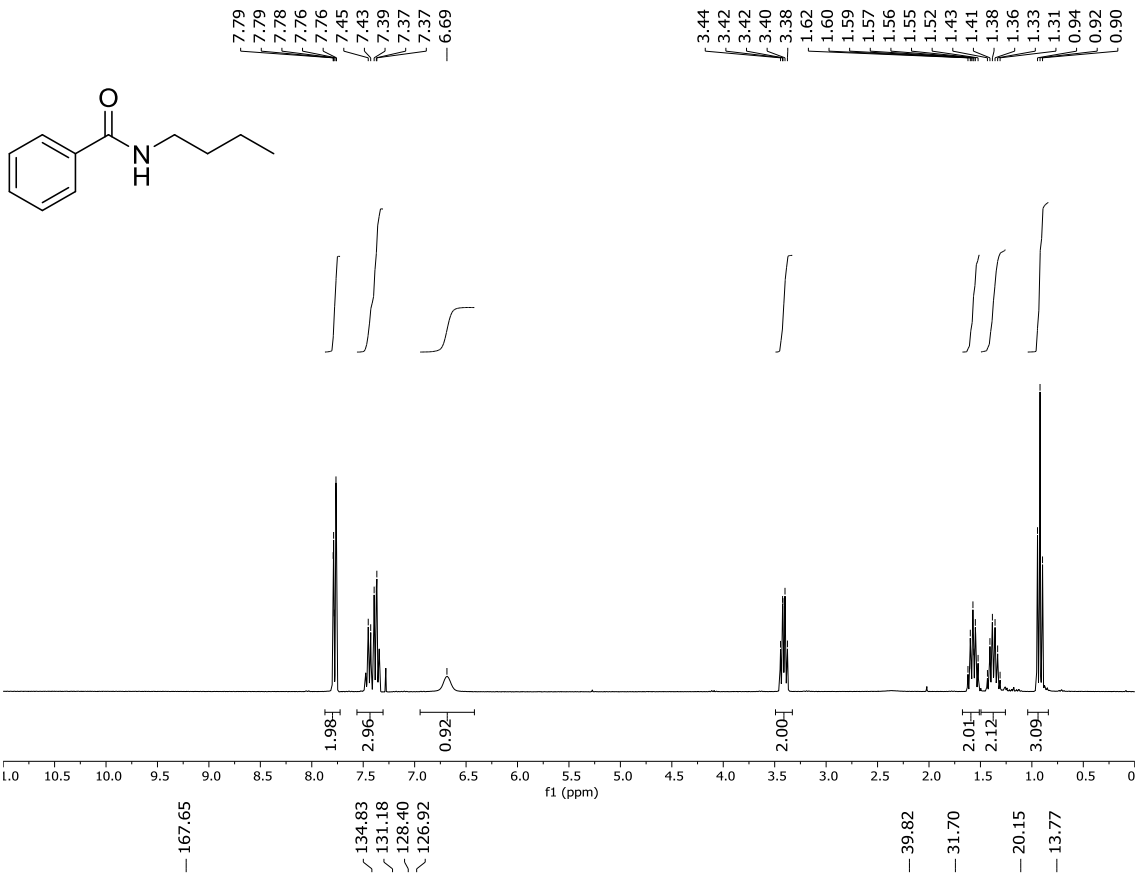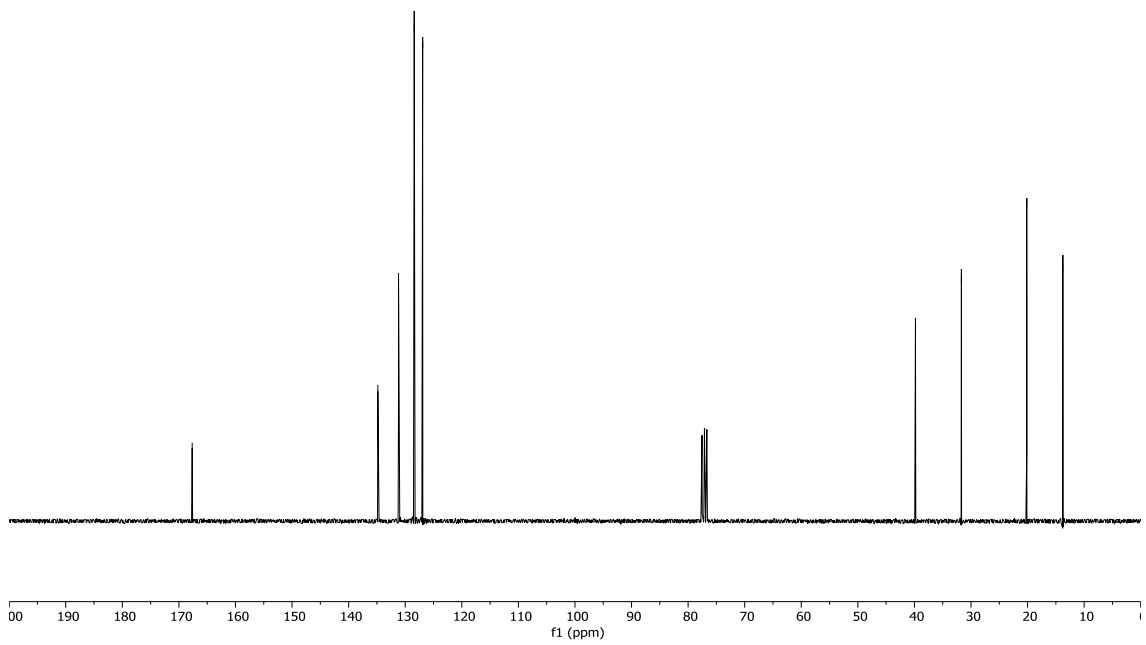

*N*-Cyclopropylbenzamide

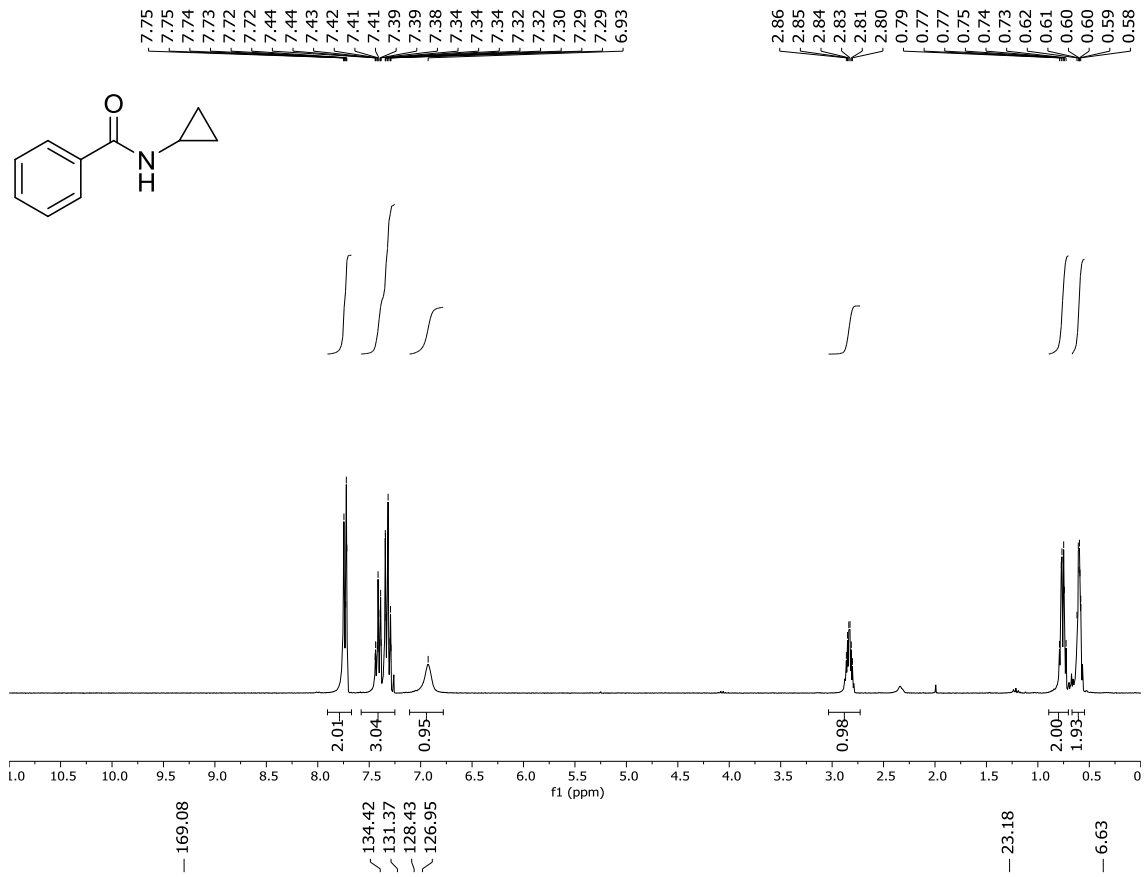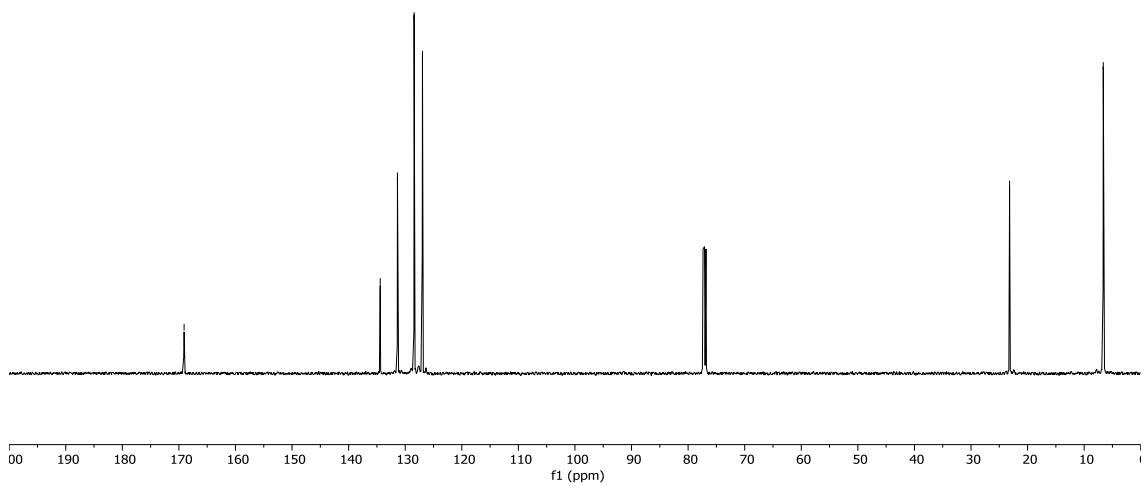

N-Cyclohexylbenzamide

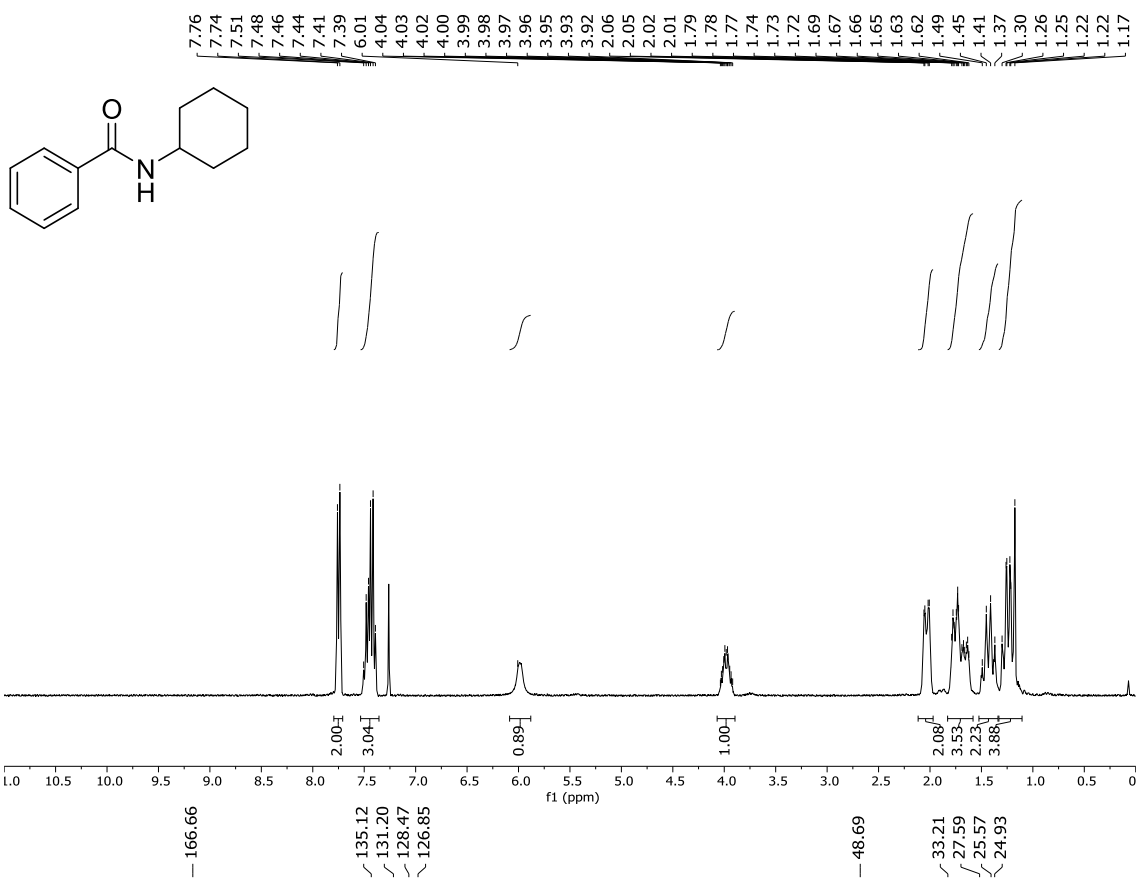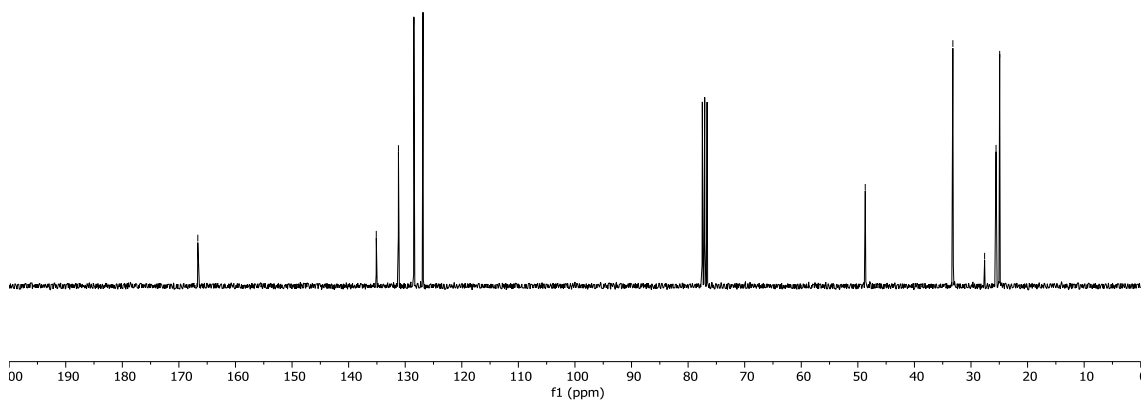

# N-Isopropylbenzamide

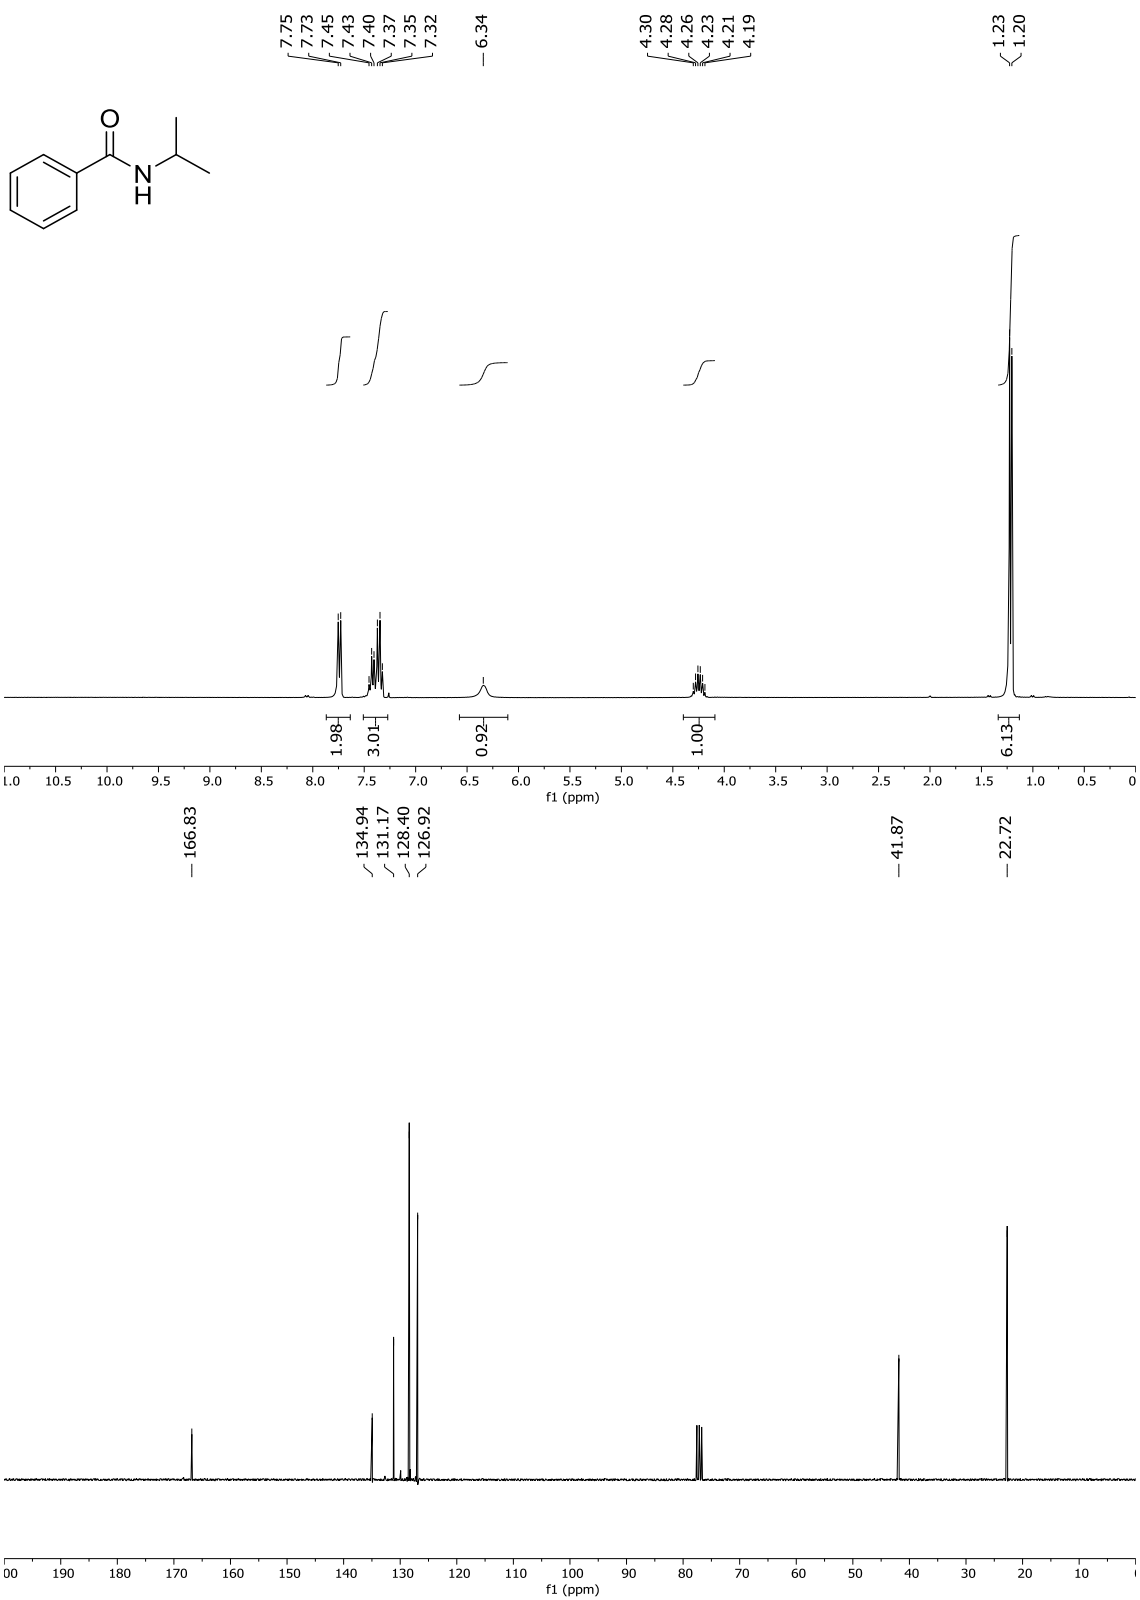

*N*-(Prop-2-yn-1-yl)benzamide

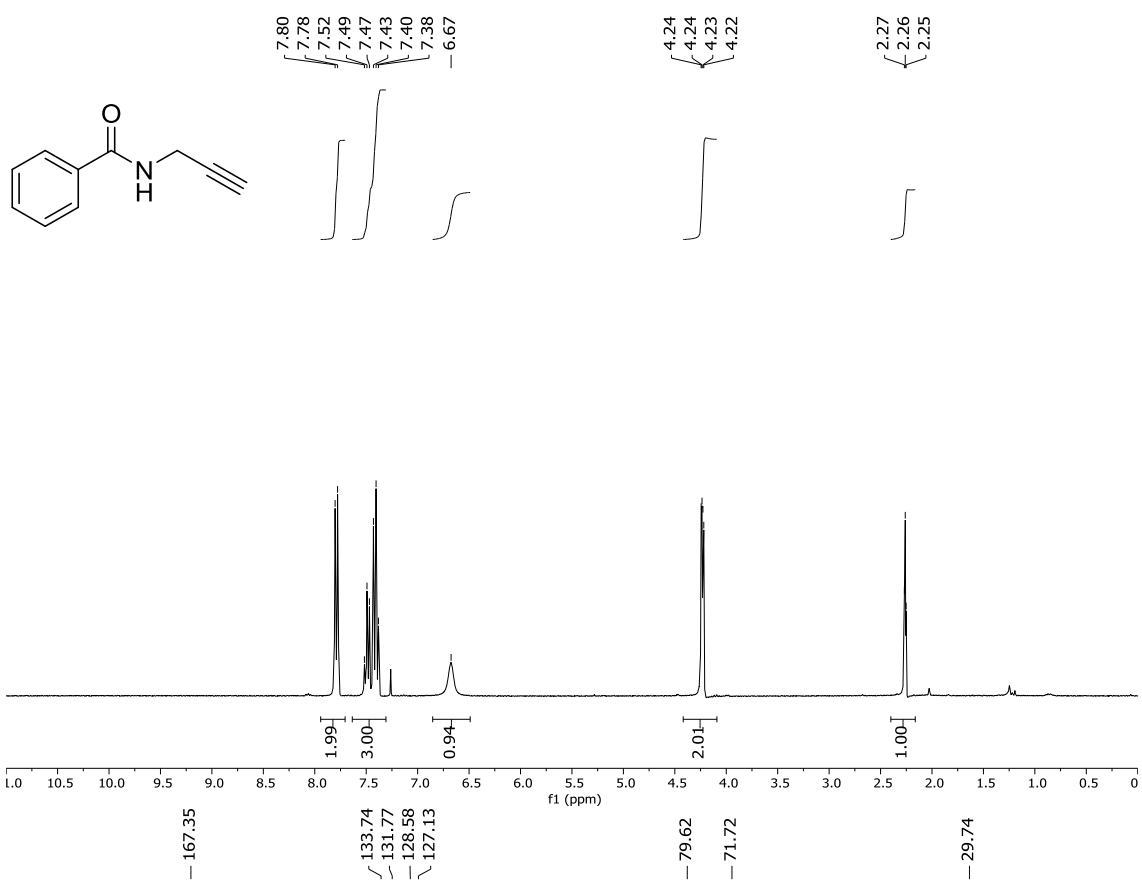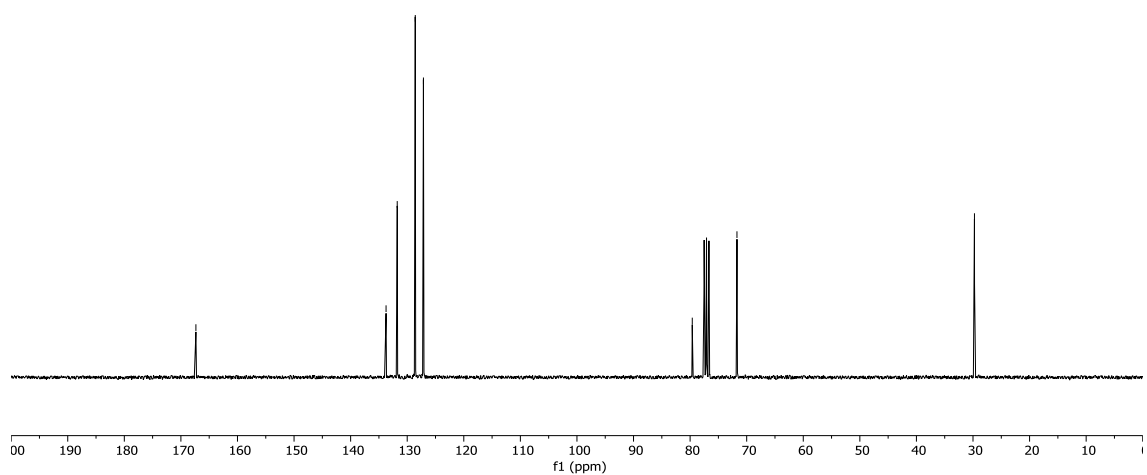

*N*-(3-phenylprop-2-yn-1-yl)benzamide

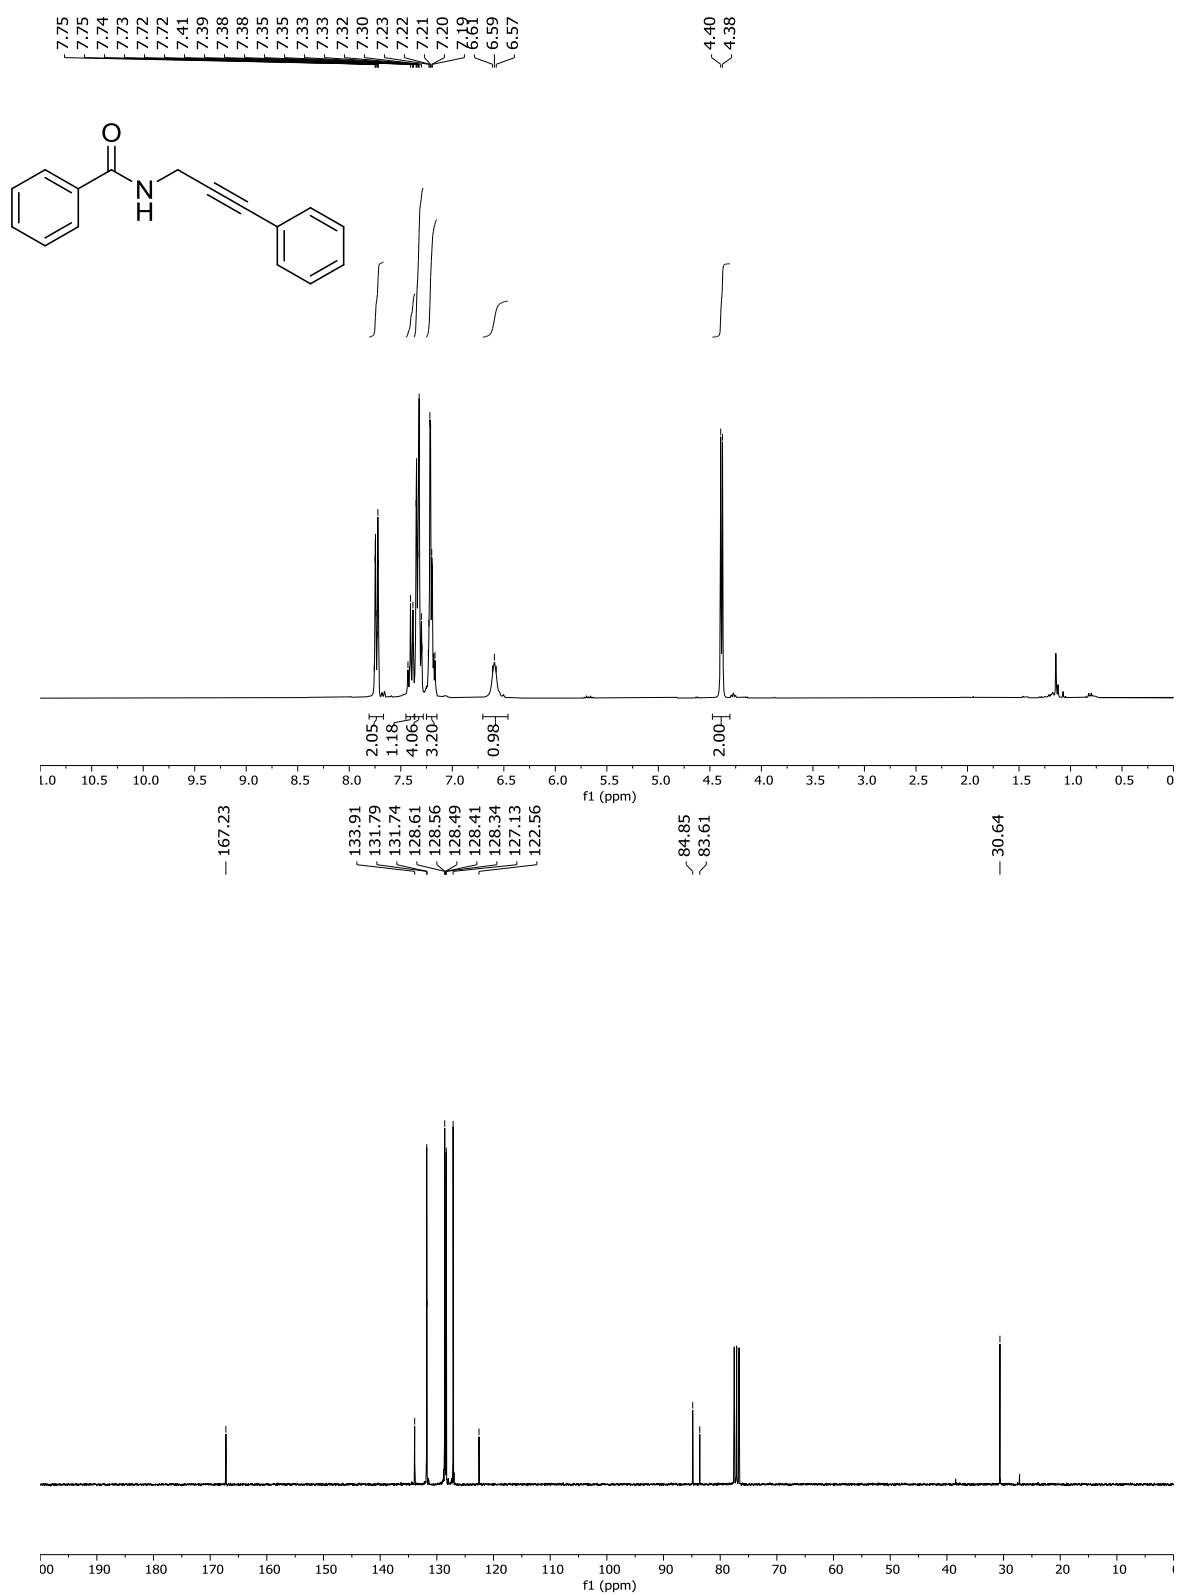

N-Allylbenzamide

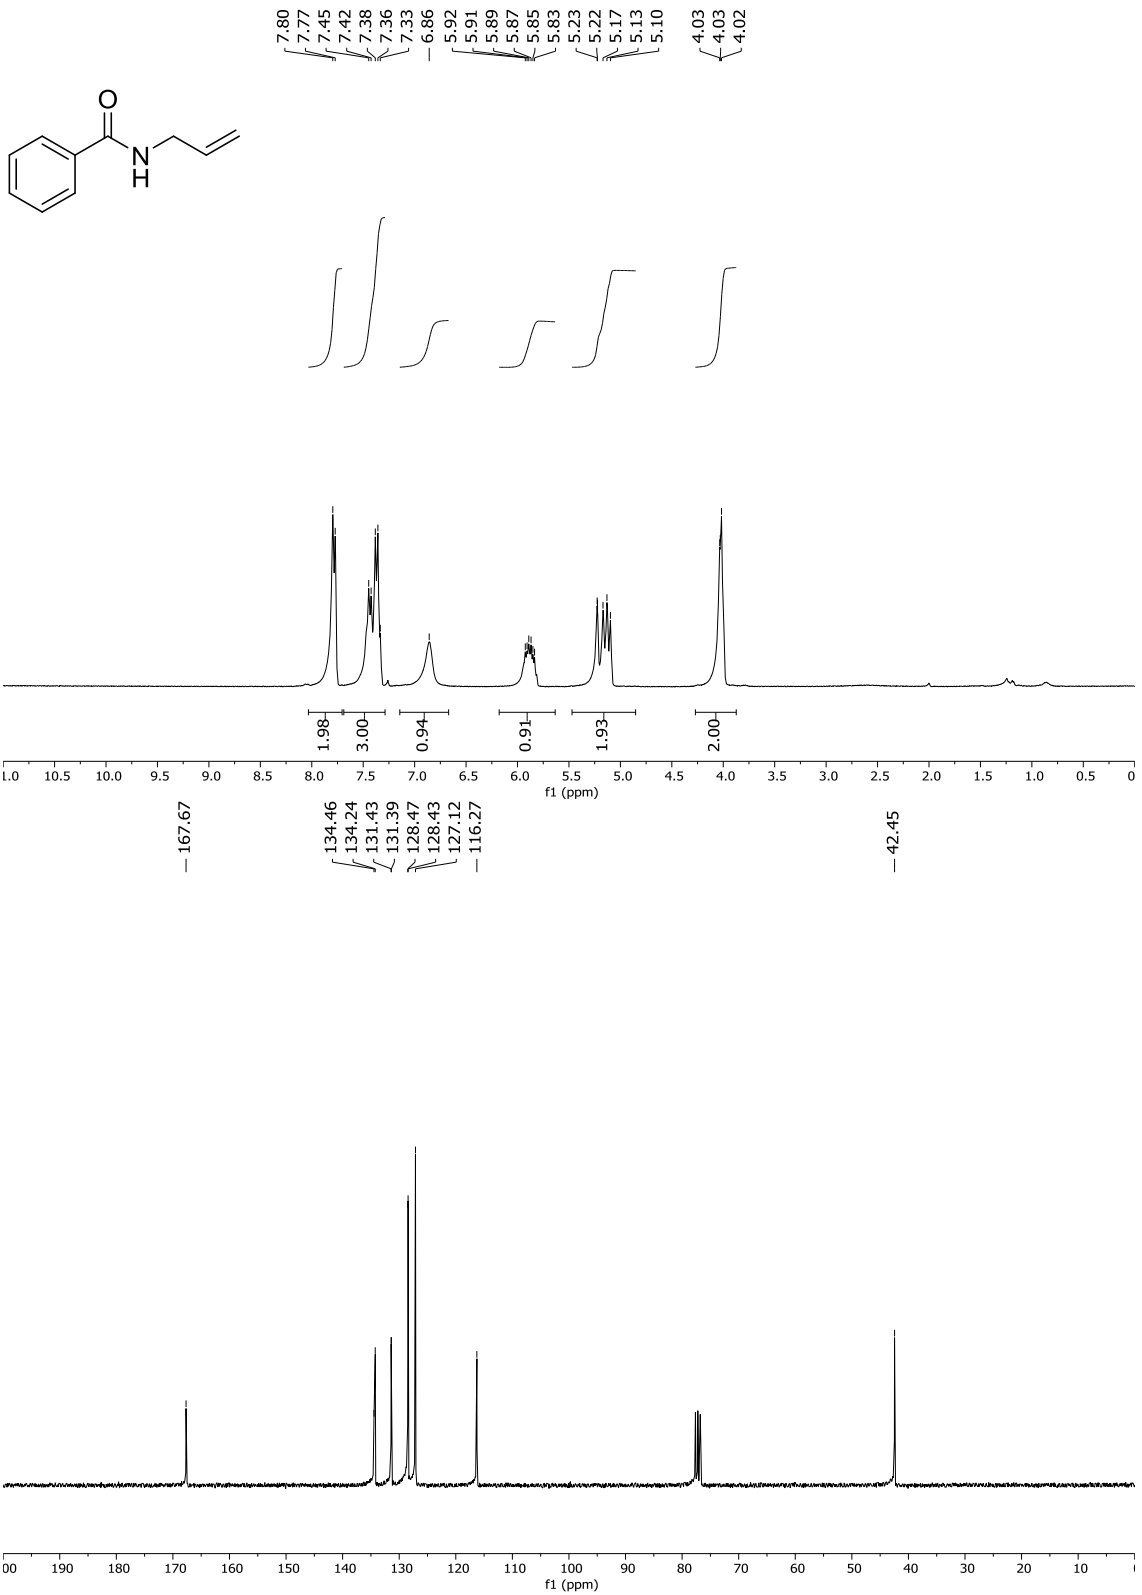



# N-Phenylbenzamide

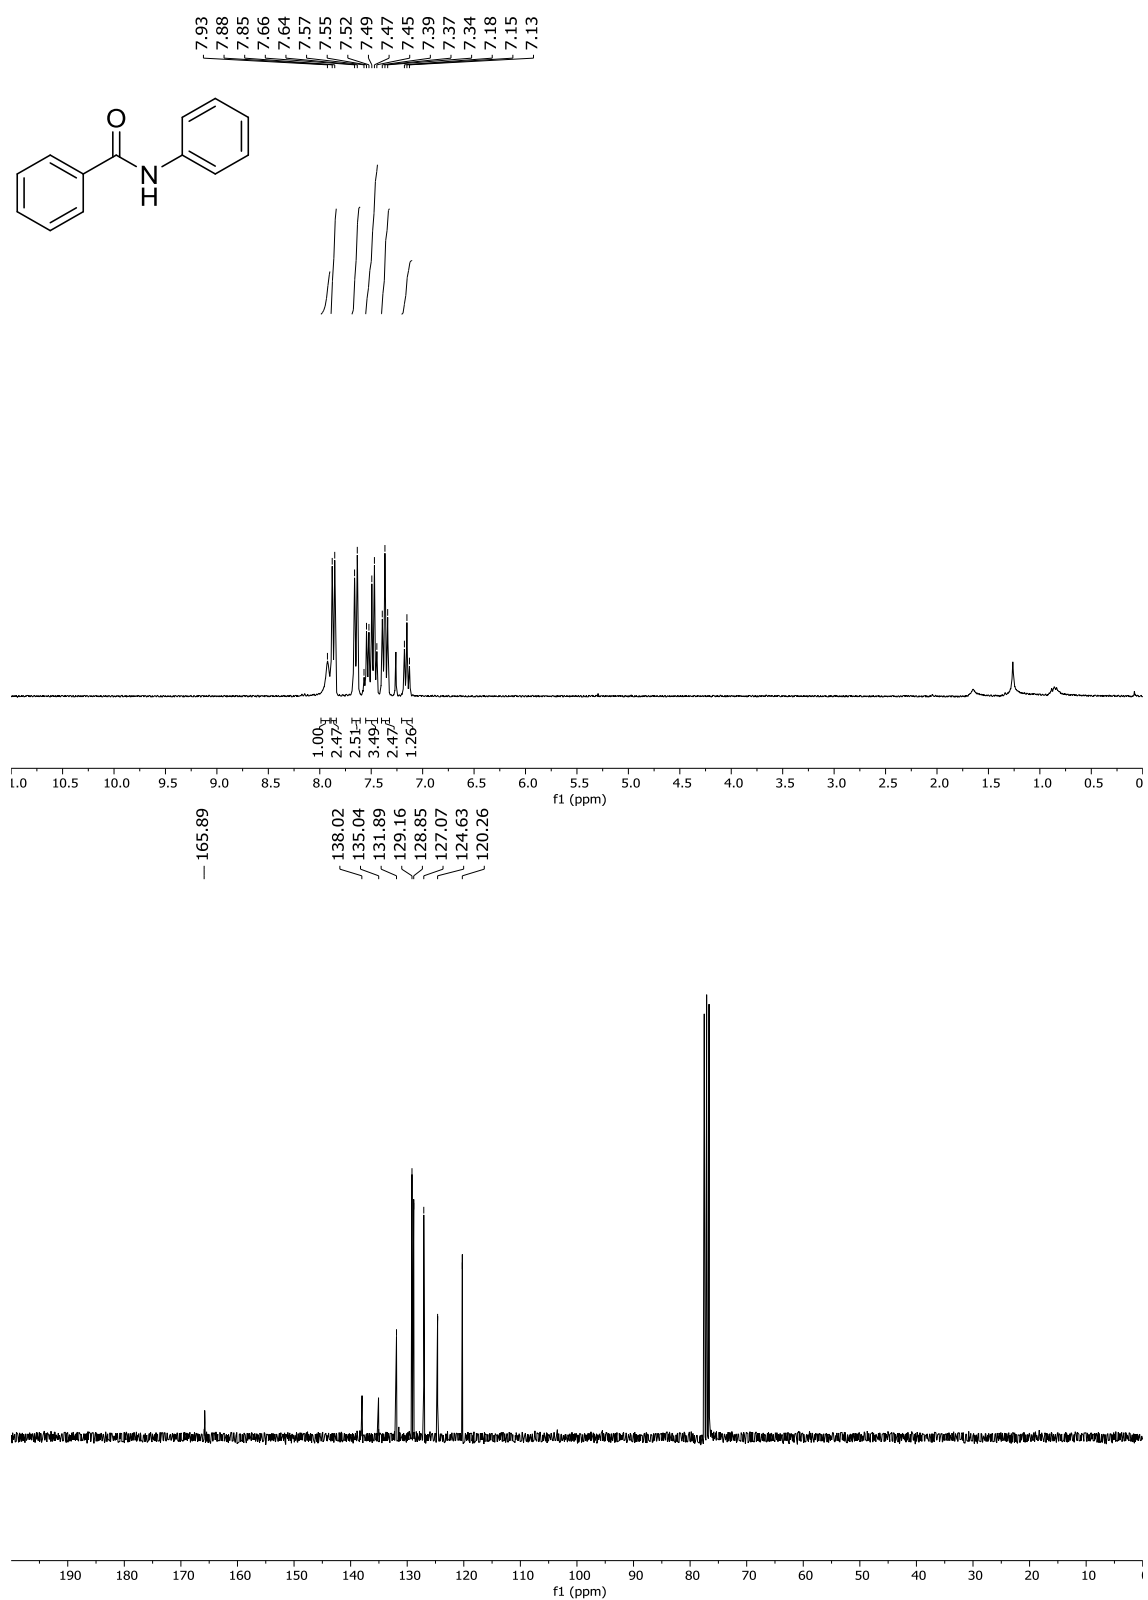

*N*-(2-Ethylphenyl)benzamide

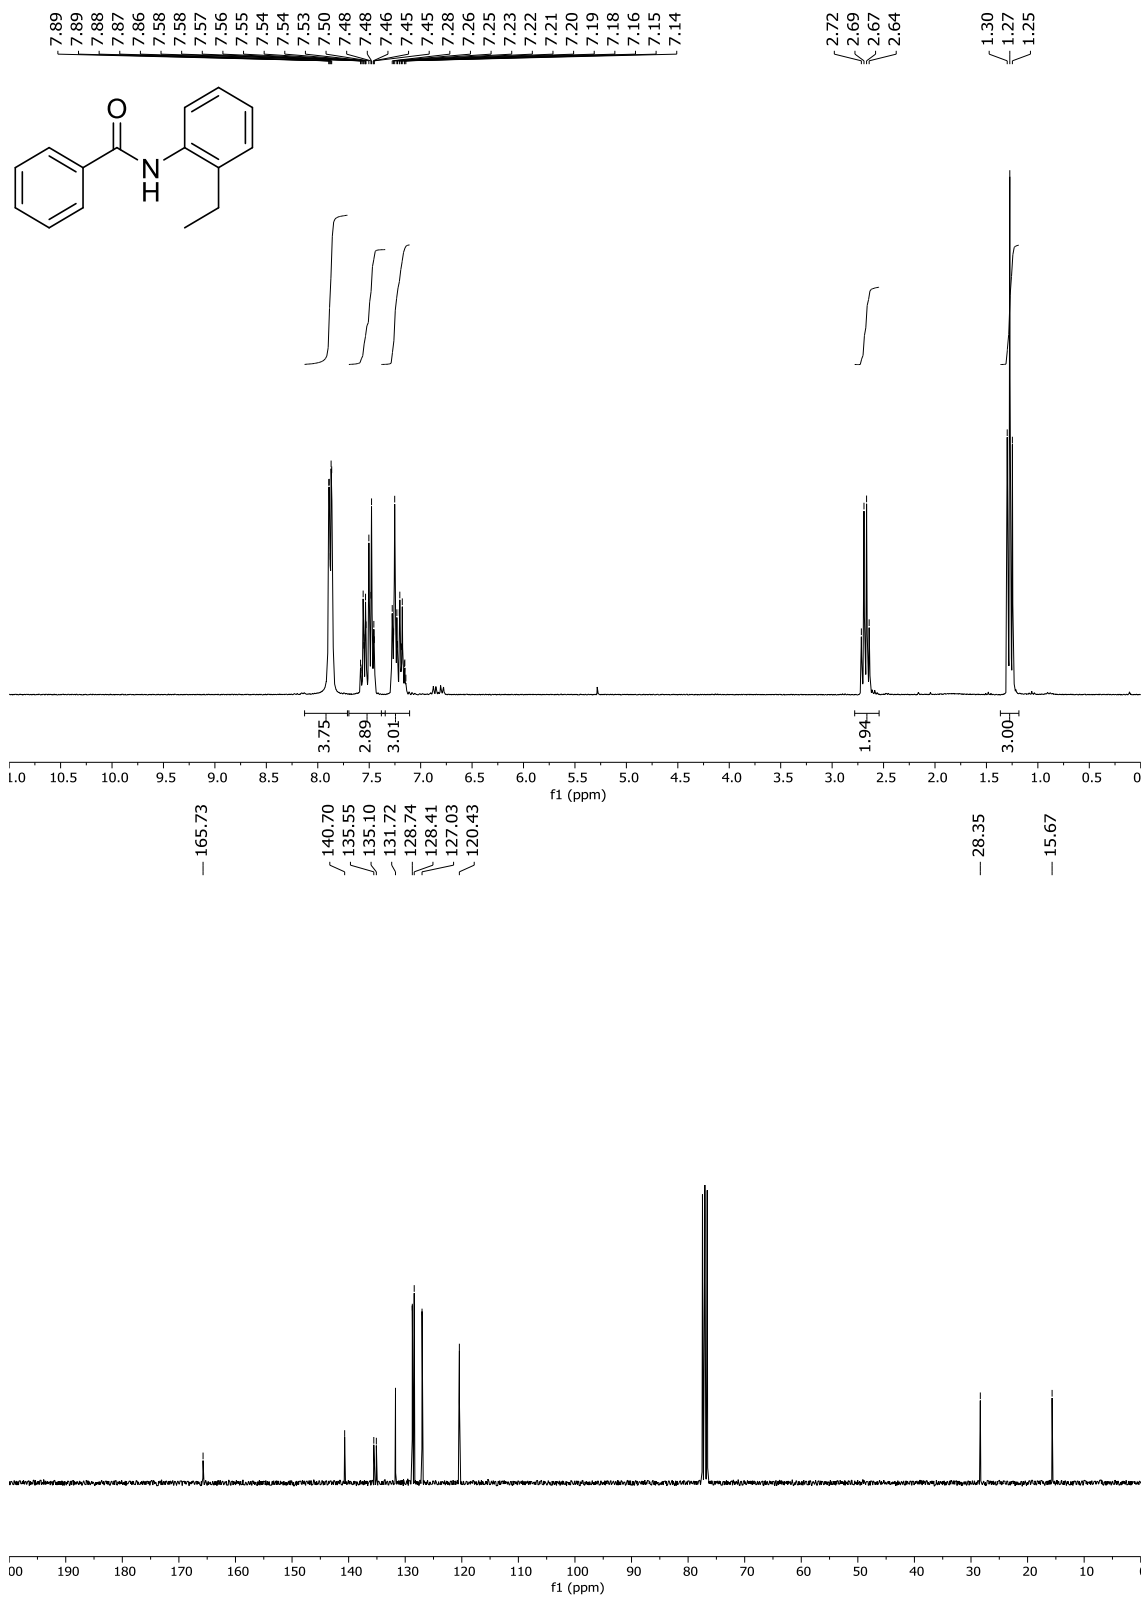

# N-(2-Methoxyphenyl)benzamide

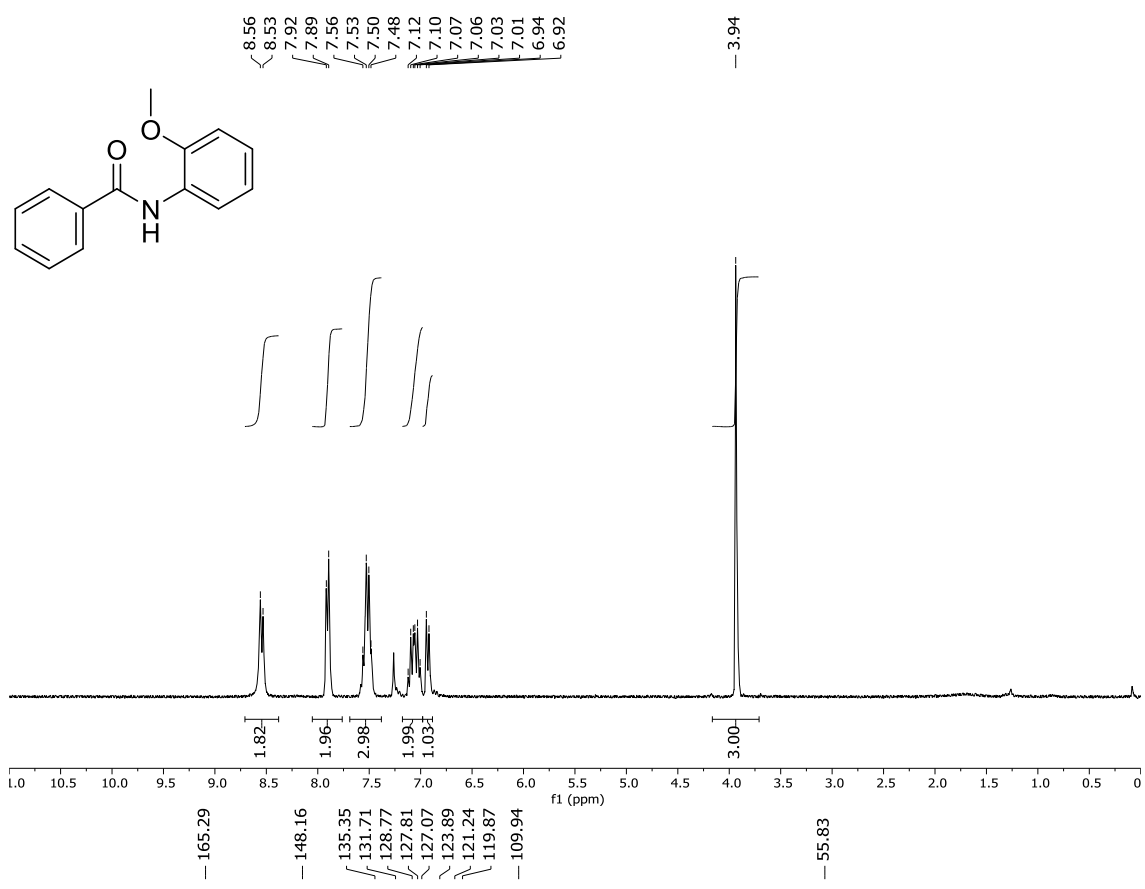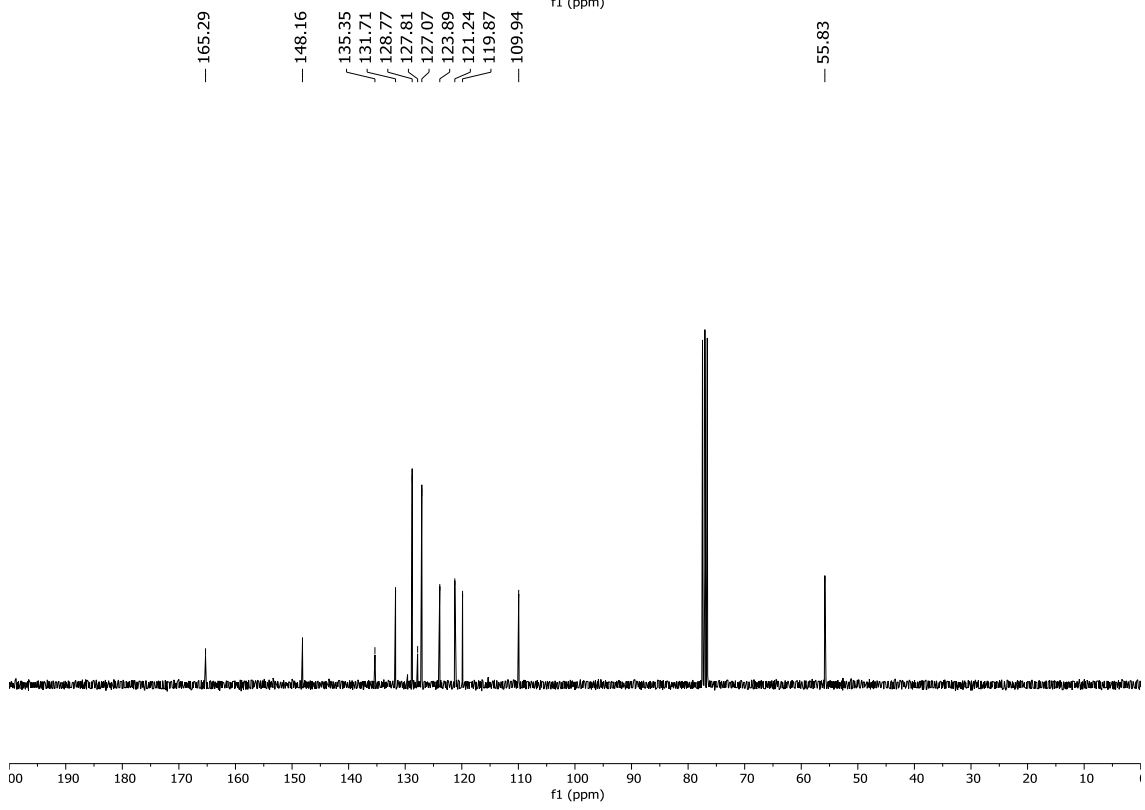

*N*-(2,6-dimethylphenyl)benzamide

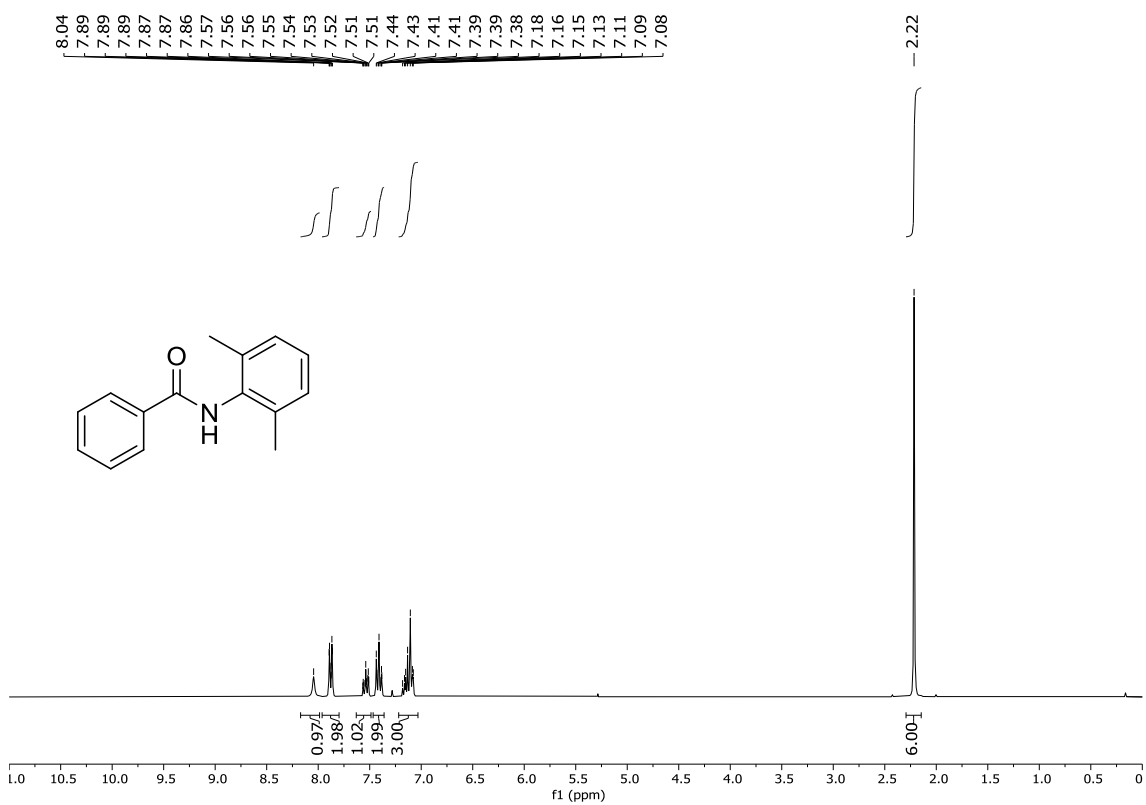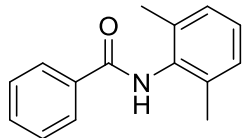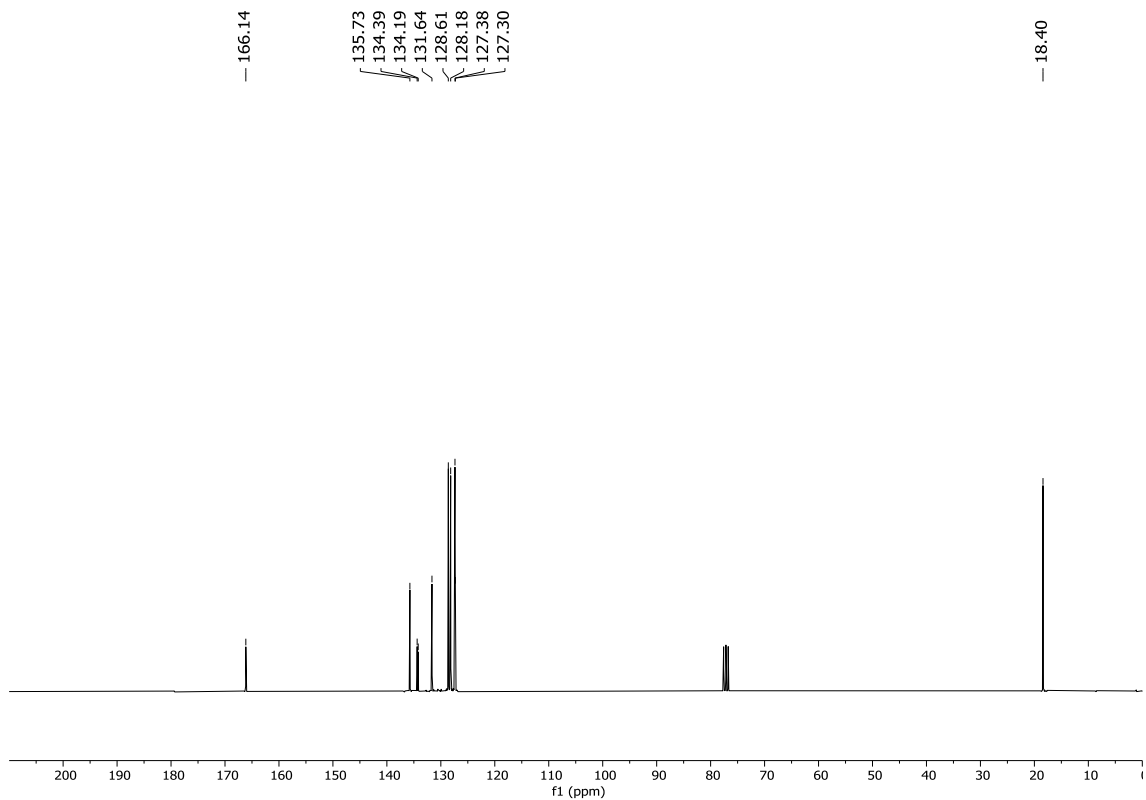

*N*-(2,5-dimethylphenyl)benzamide

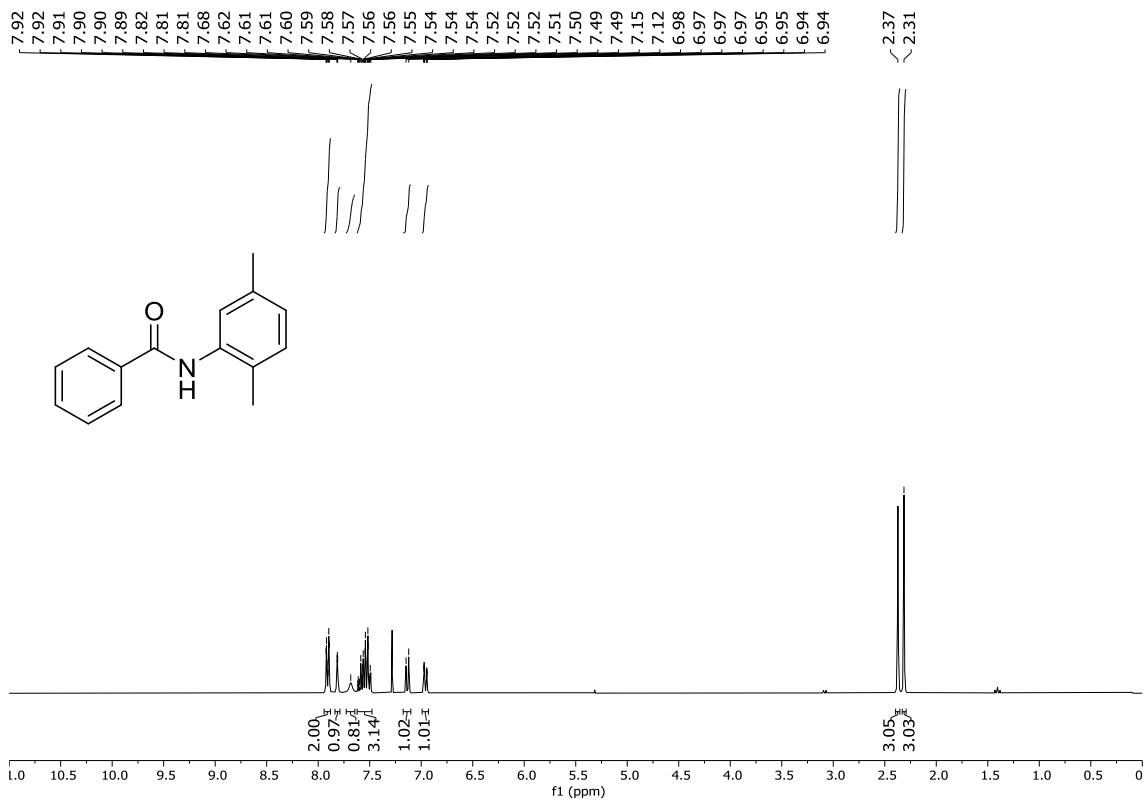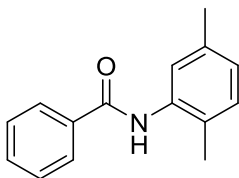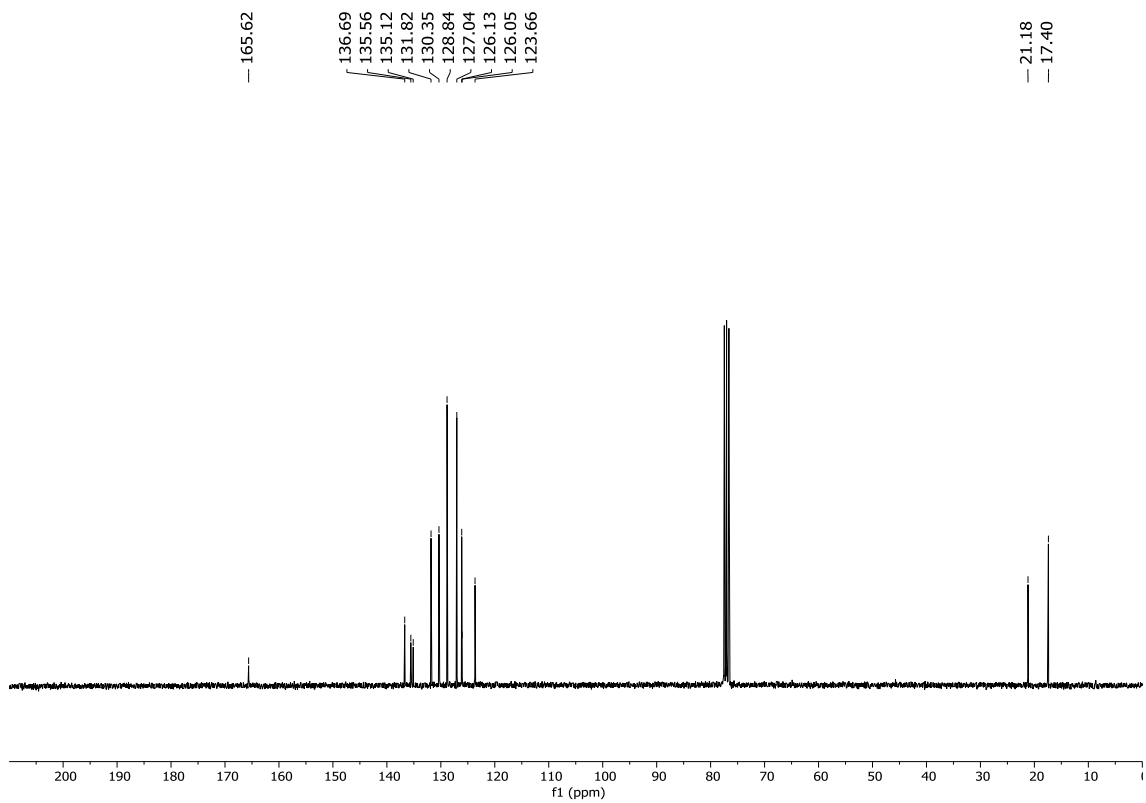

*N*-(3-(trifluoromethyl)phenyl)benzamide

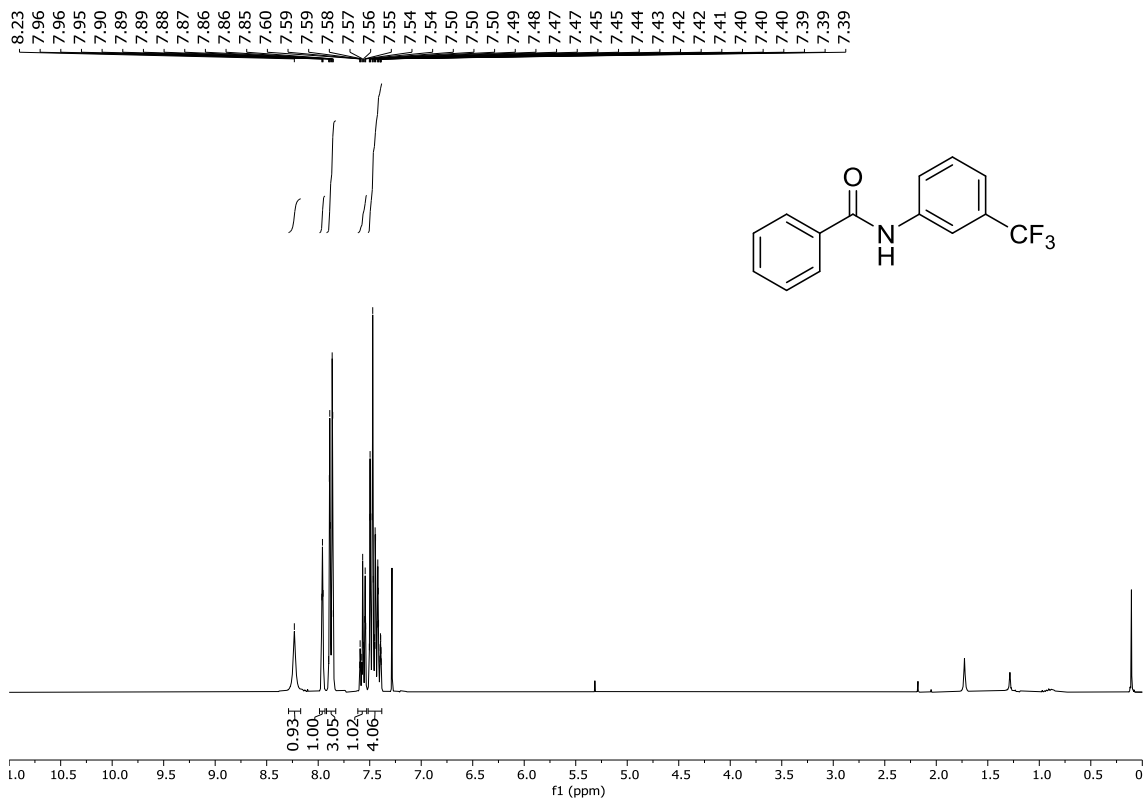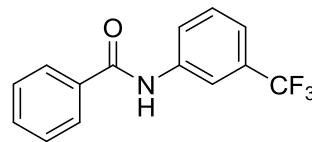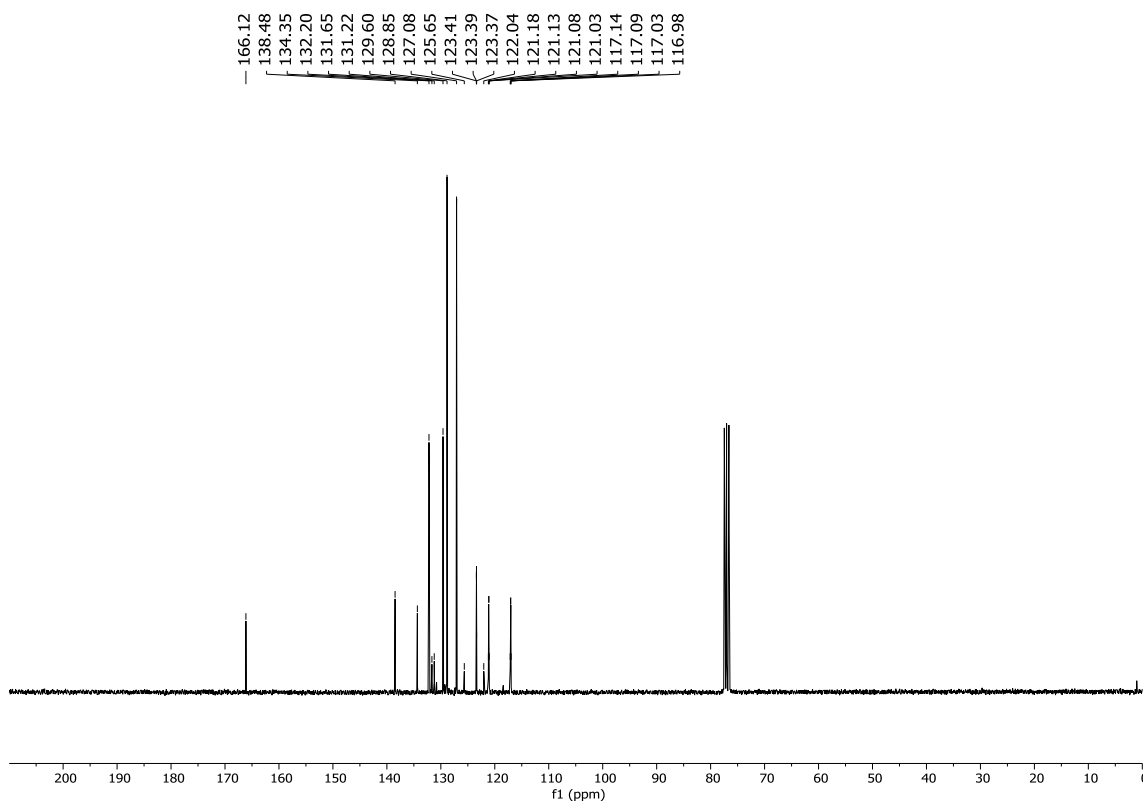

*N*-(4-(trifluoromethyl)phenyl)benzamide

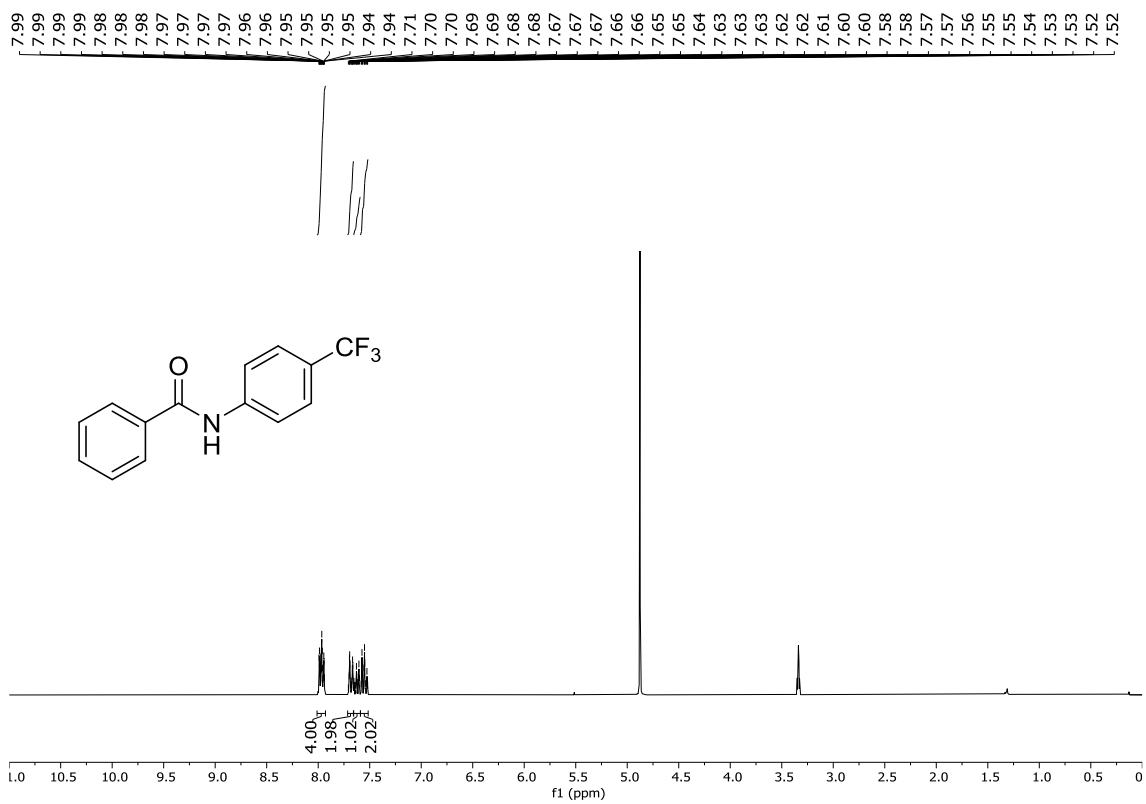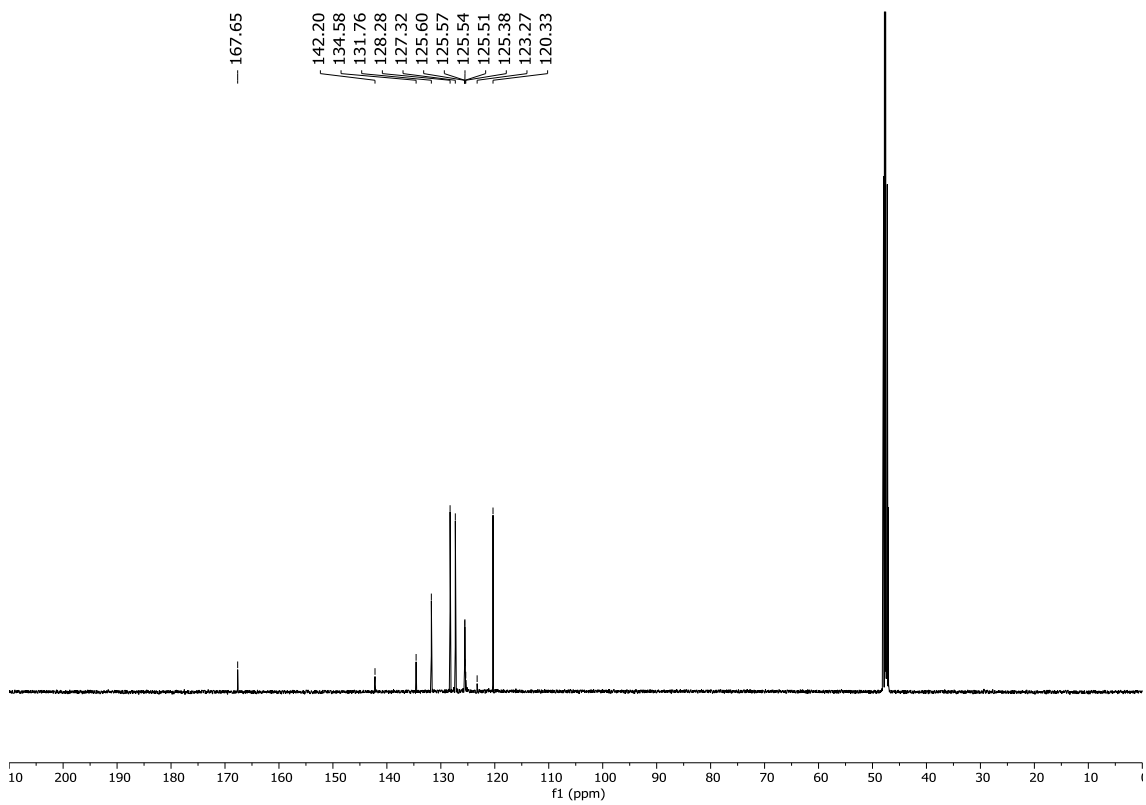

*N*-(4-Ethylphenyl)benzamide

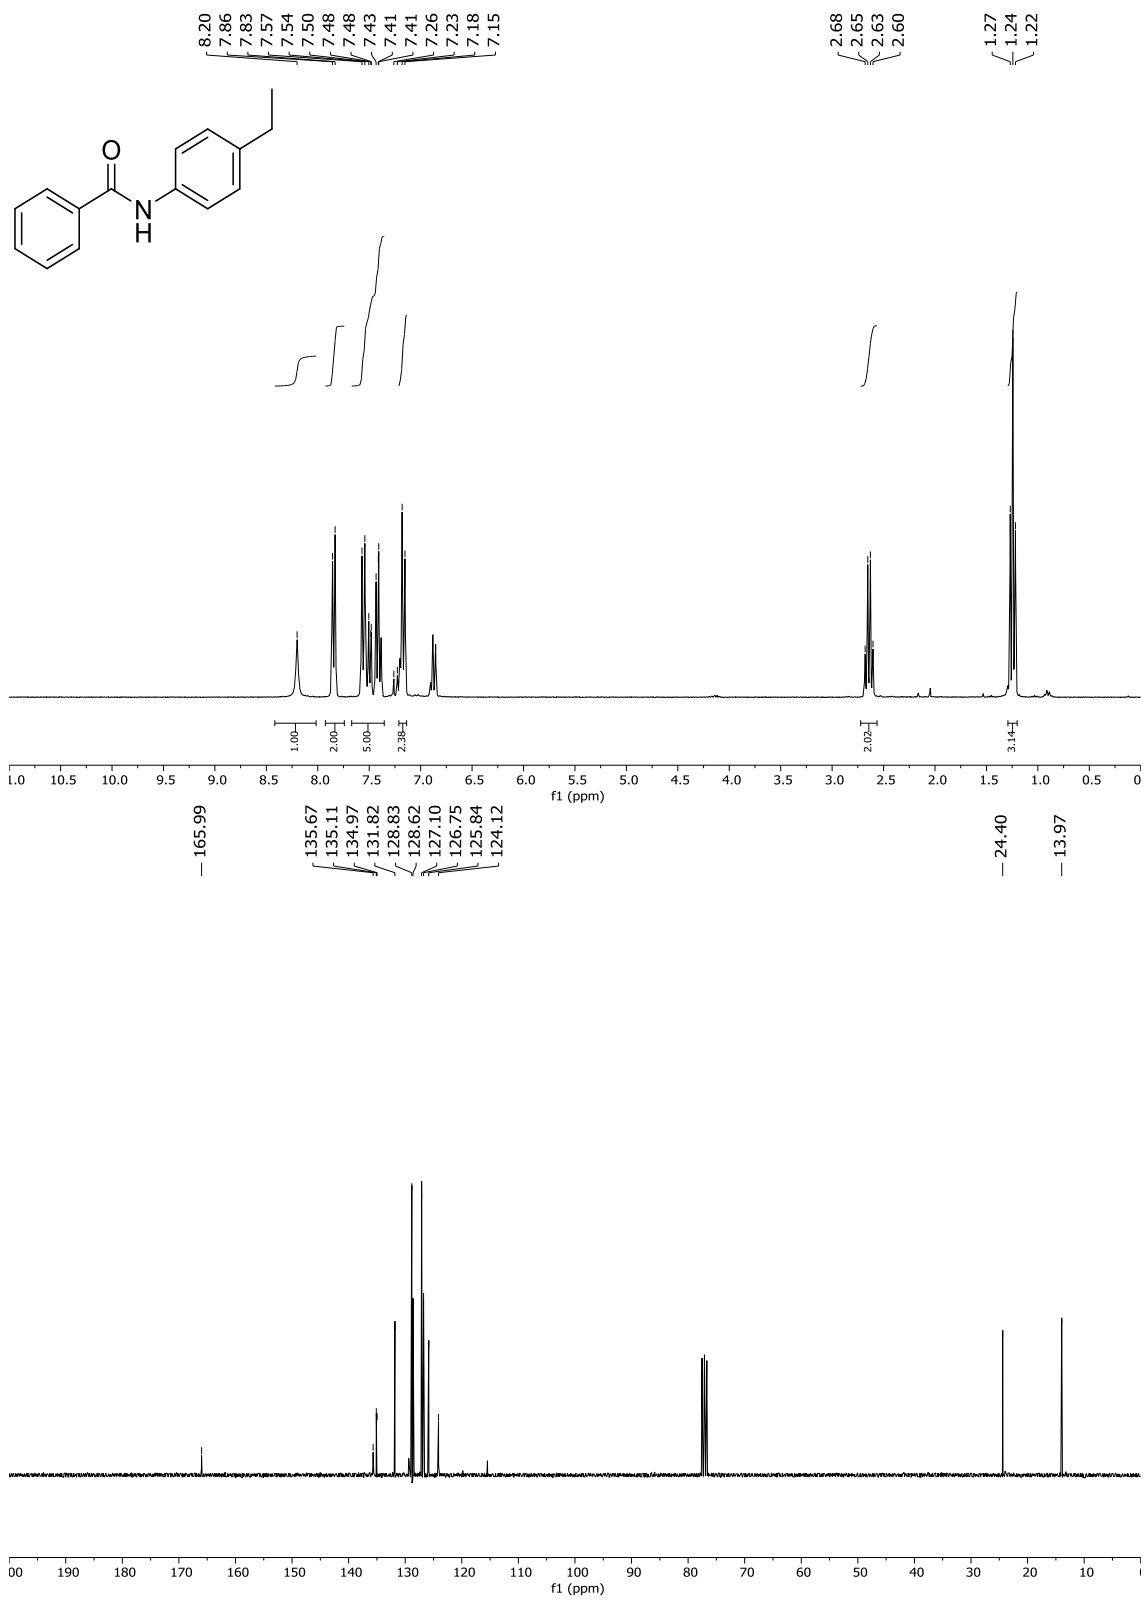



# N-(4-methoxyphenyl)benzamide

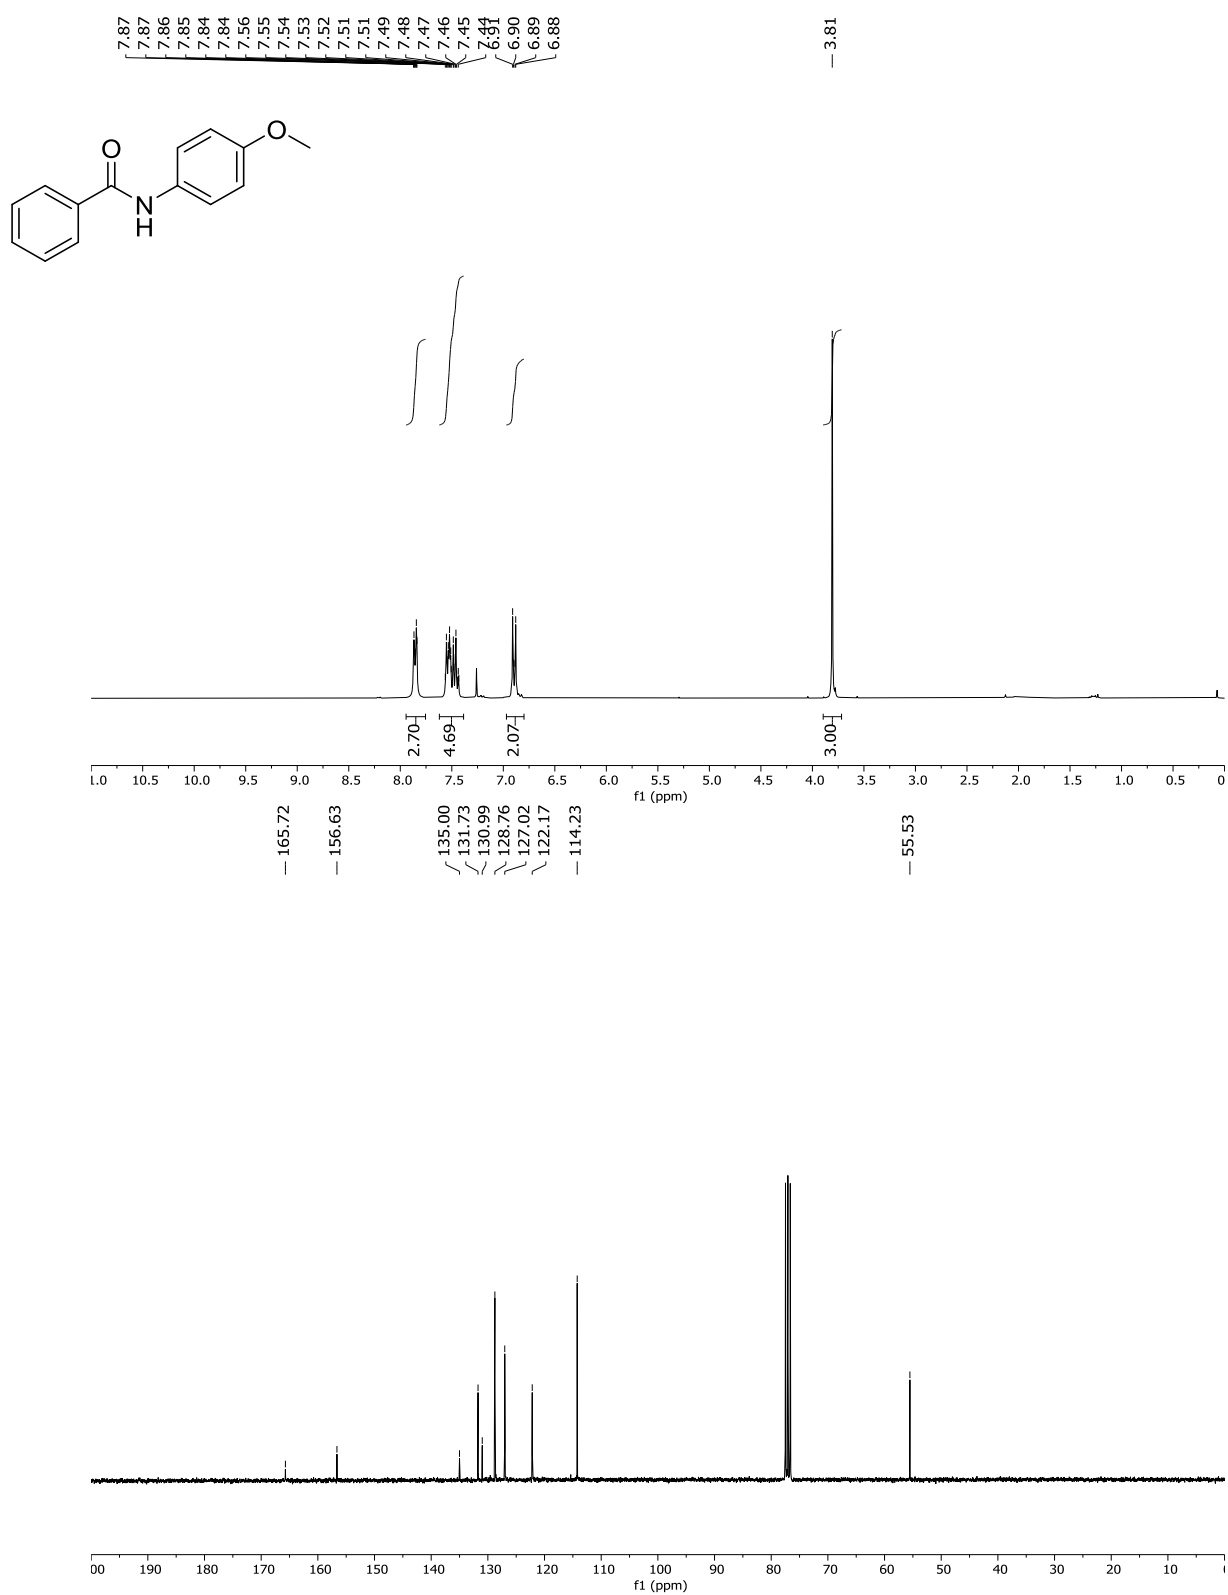

Phenyl(piperidin-1-yl)methanone

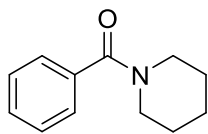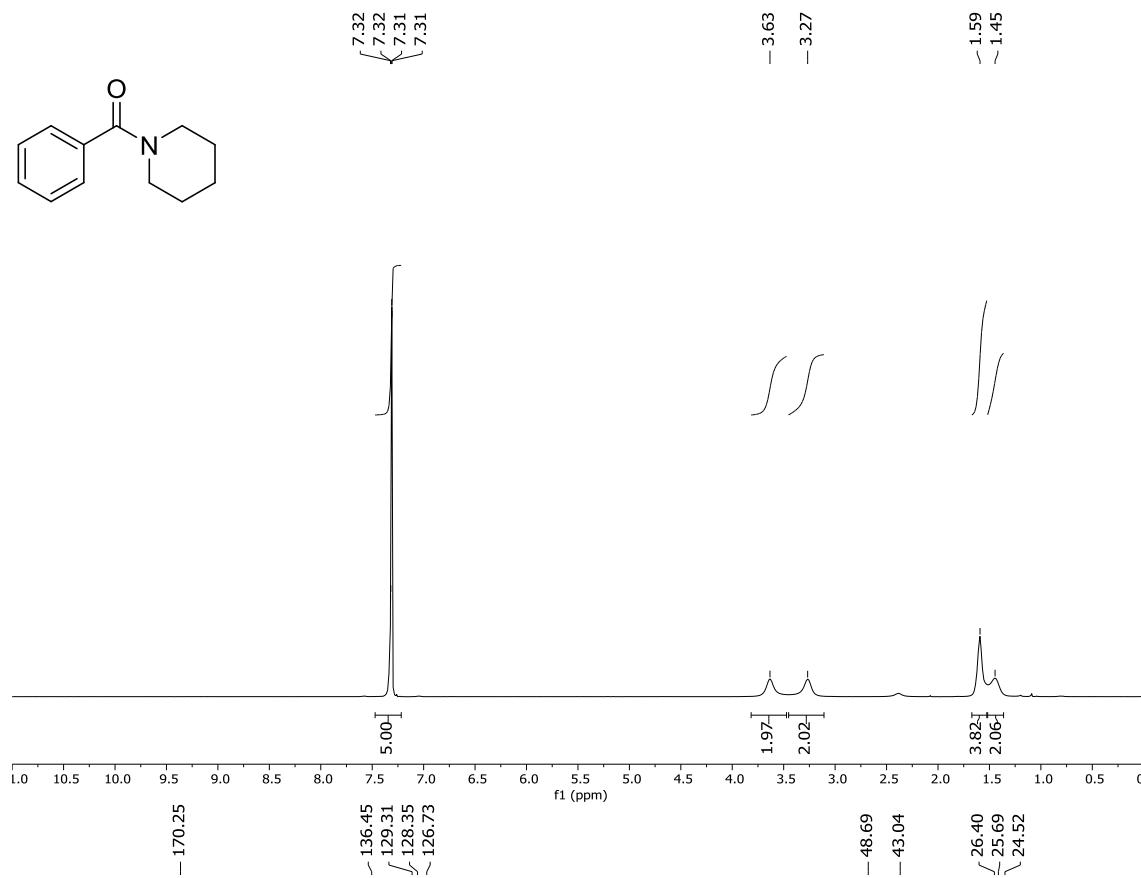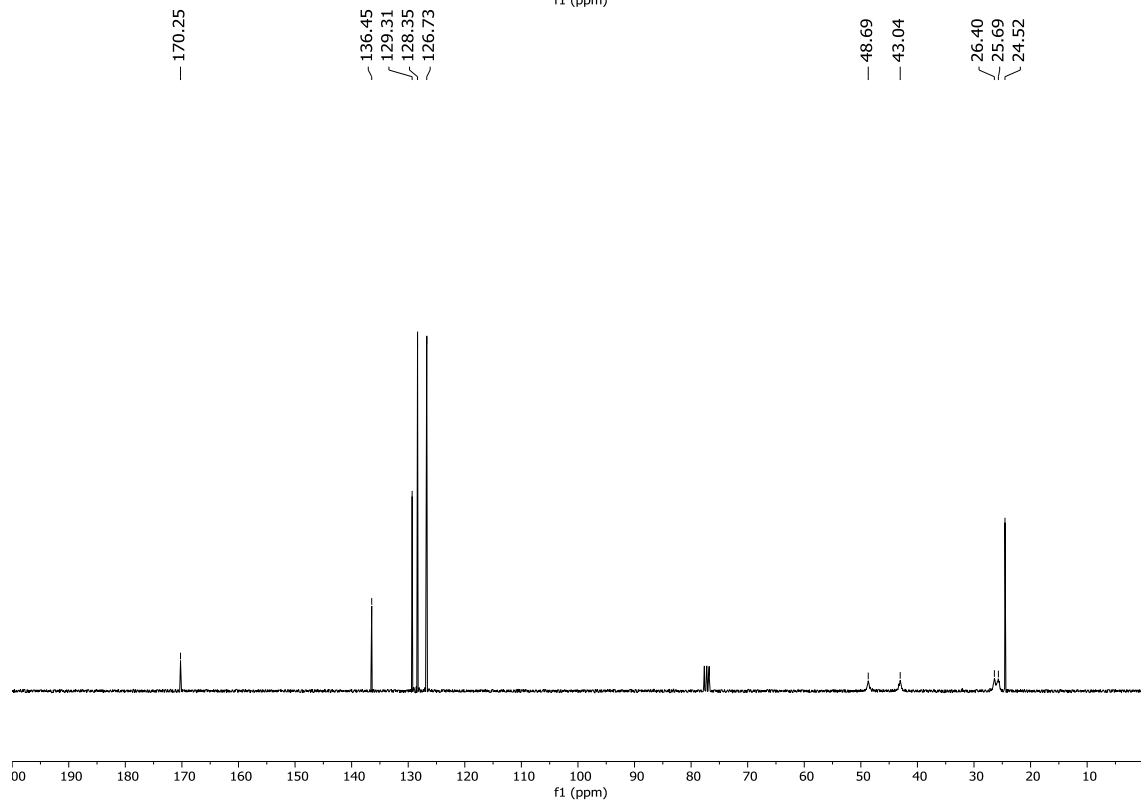

# Phenyl(pyrrolidin-1-yl)methanone

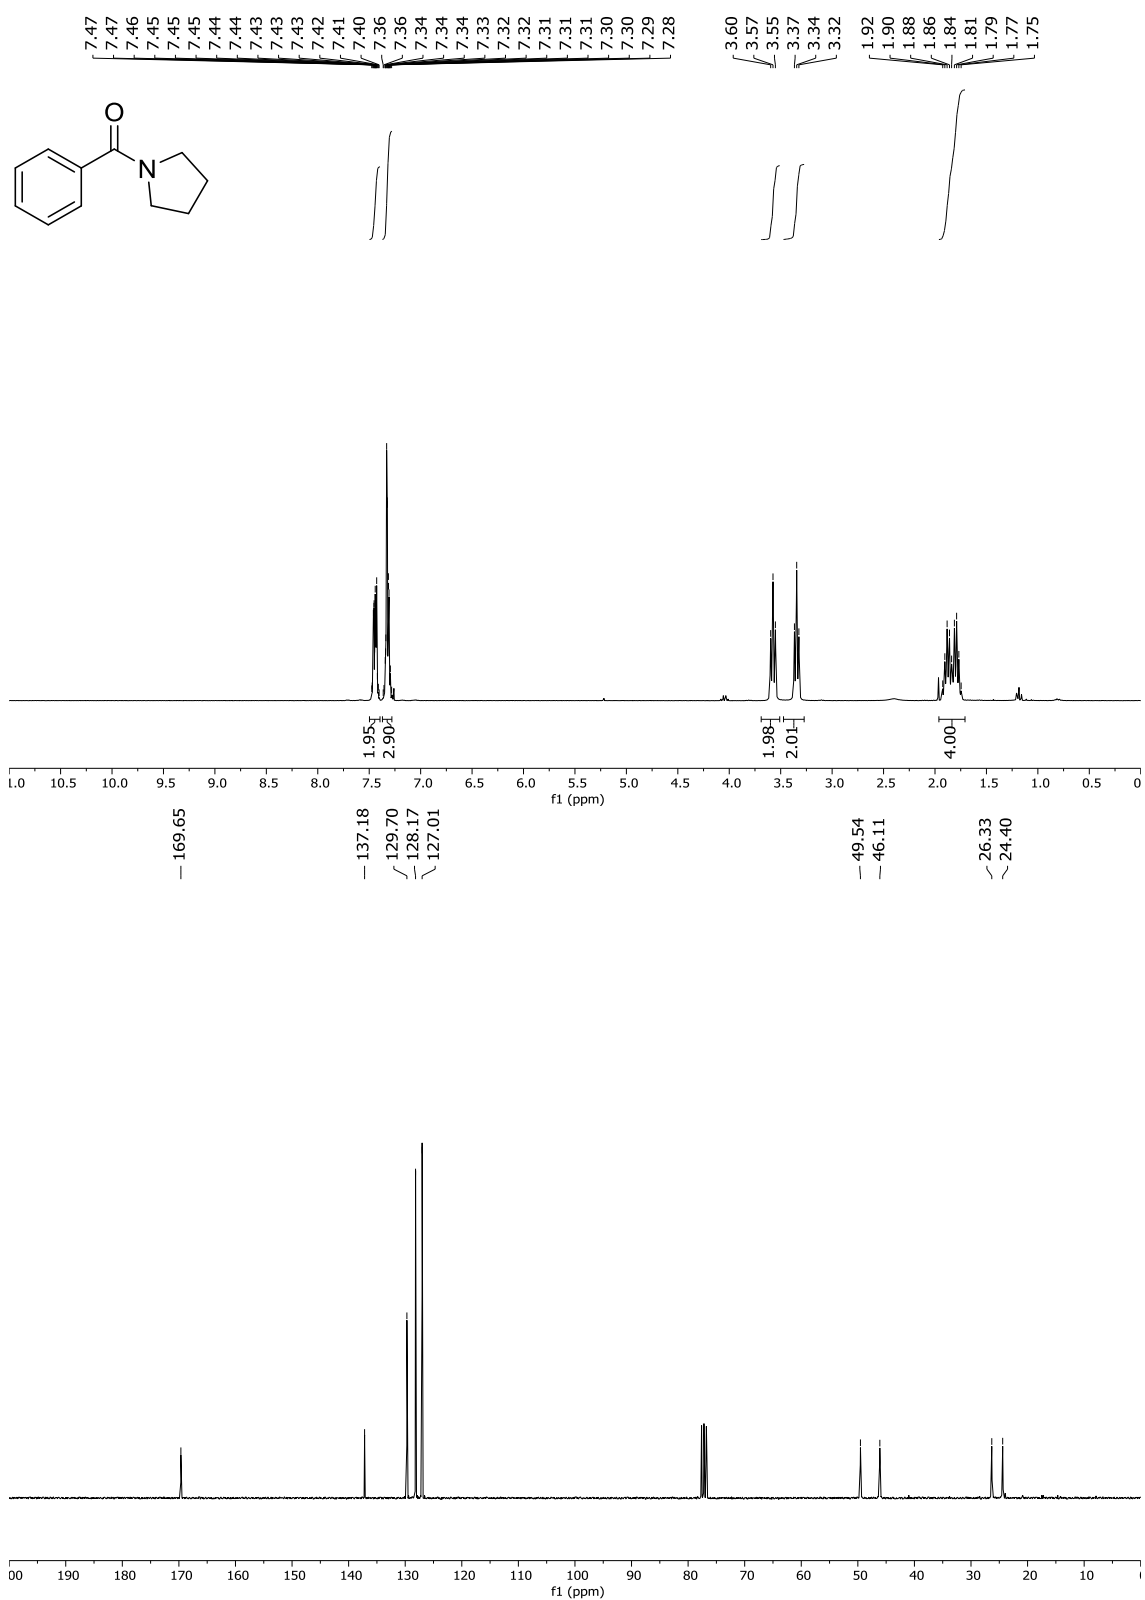

# Morpholino(phenyl)methanone

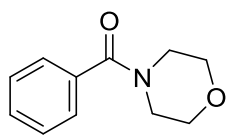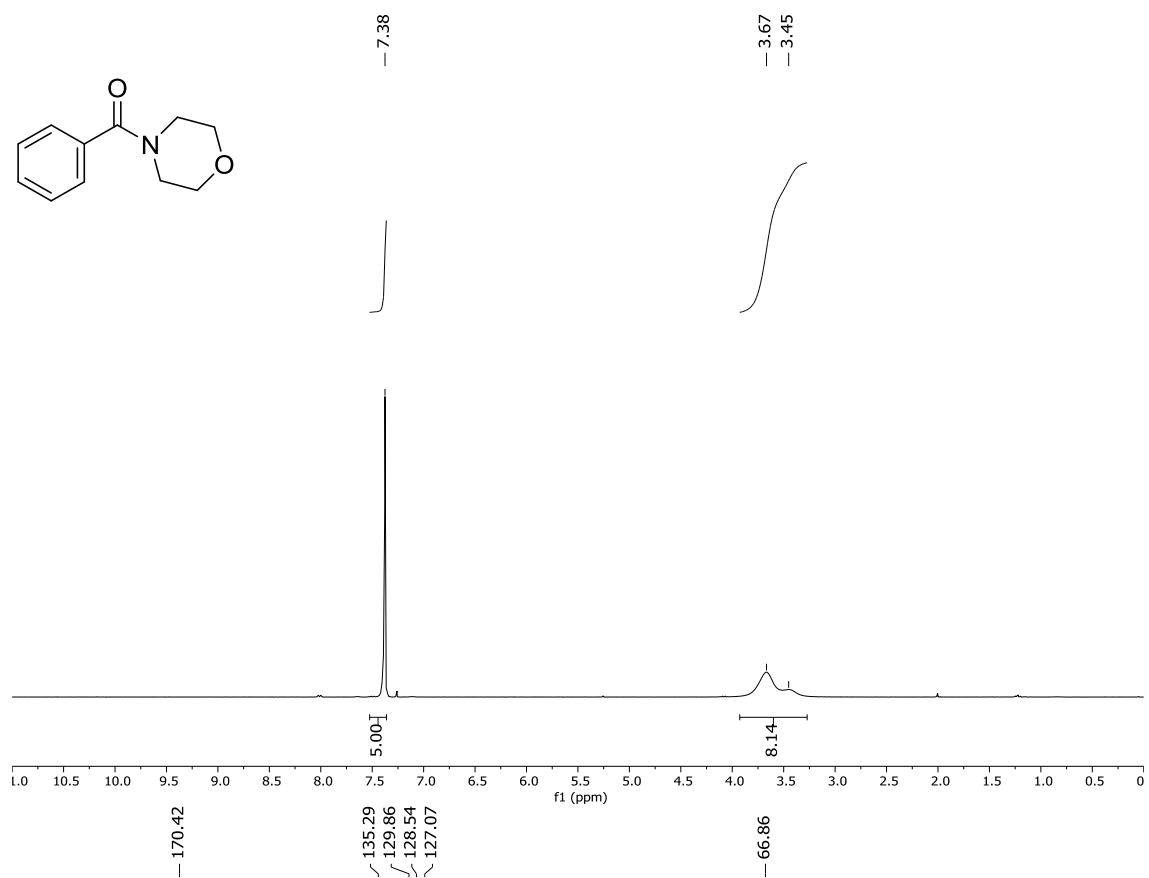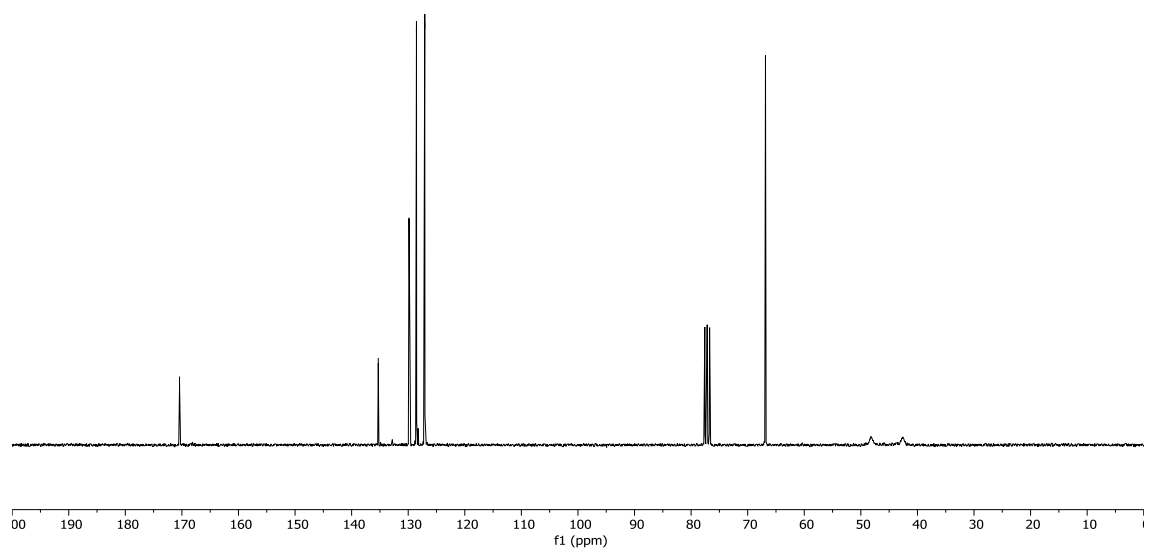

(4-Methylpiperazin-1-yl)(phenyl)methanone

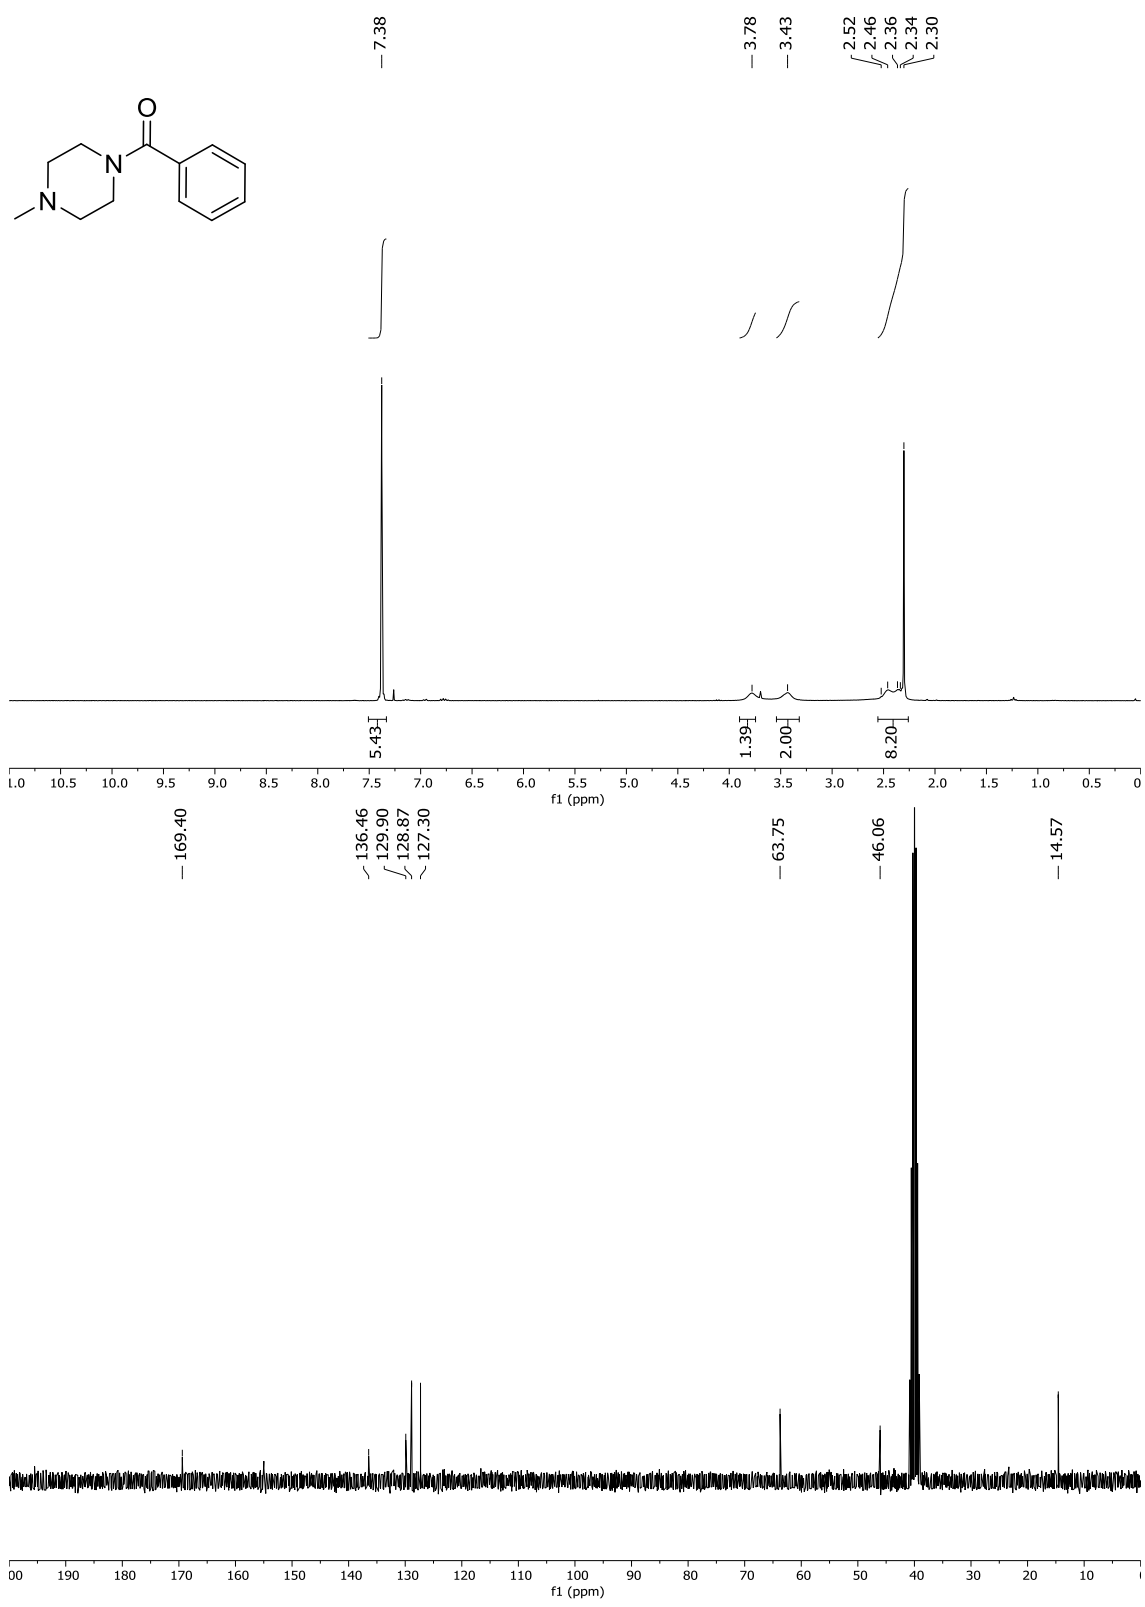

# Indolin-1-yl(phenyl)methanone

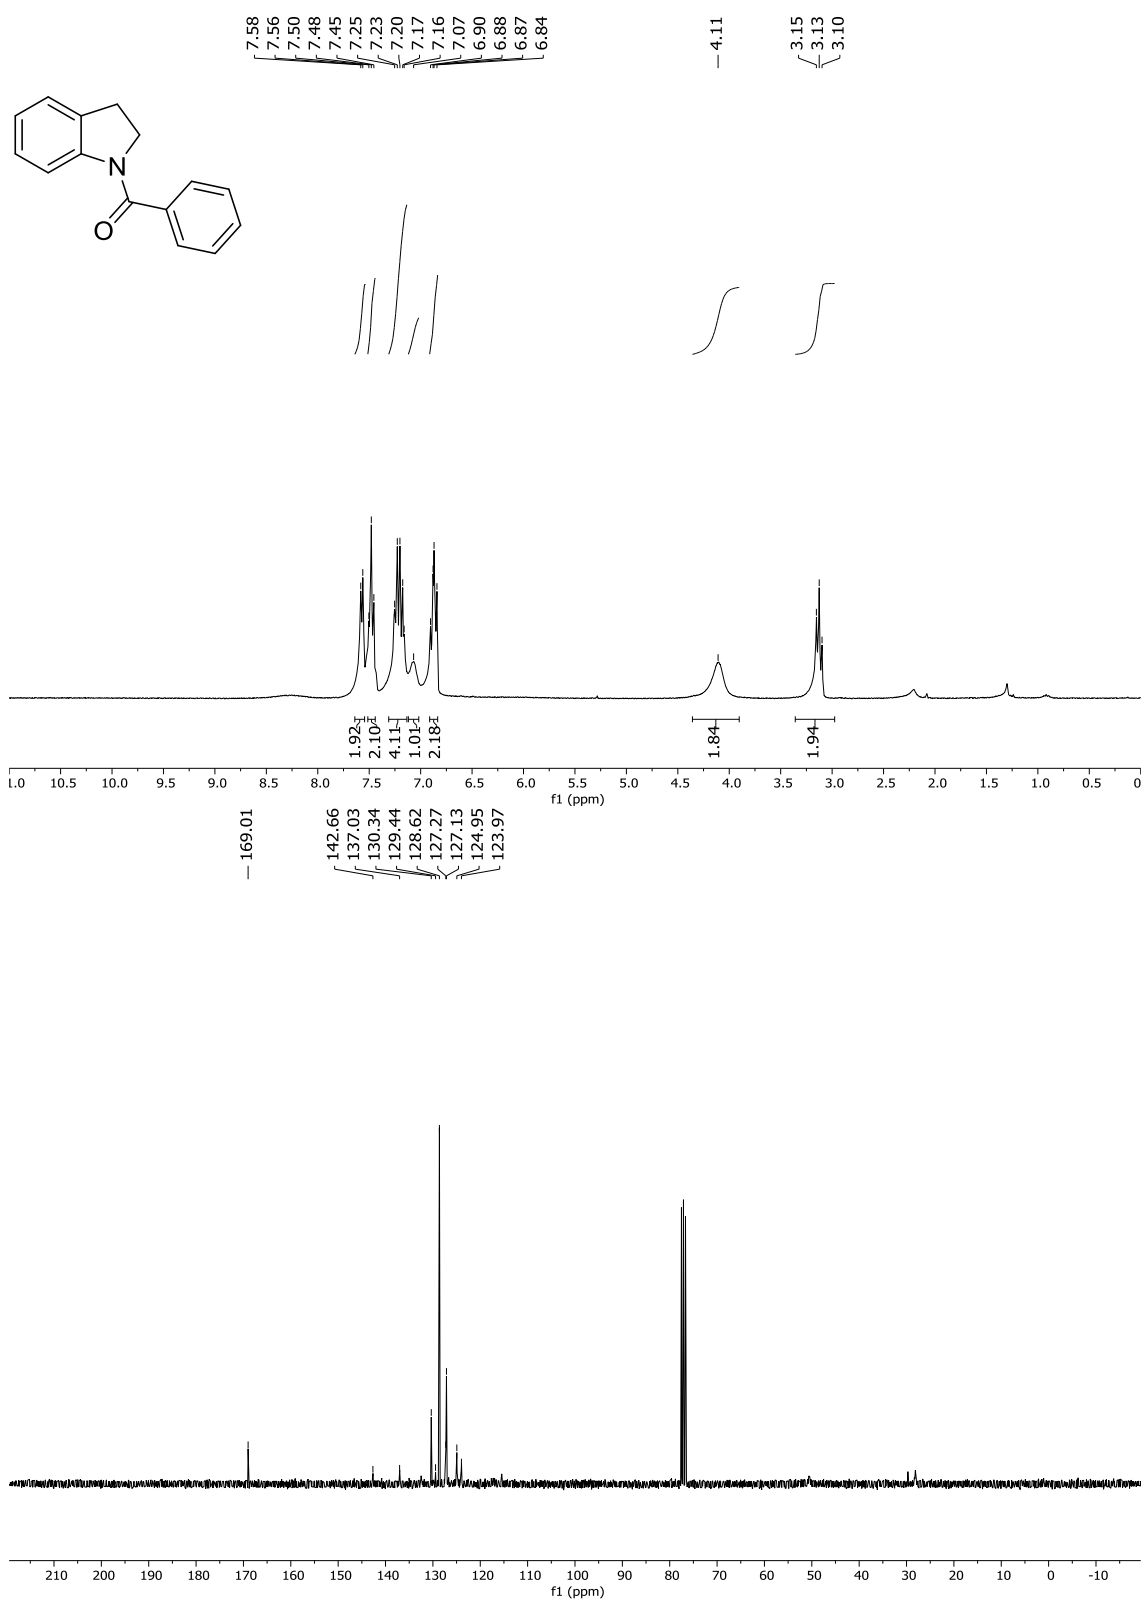

# N-Benzyl-N-methylbenzamide

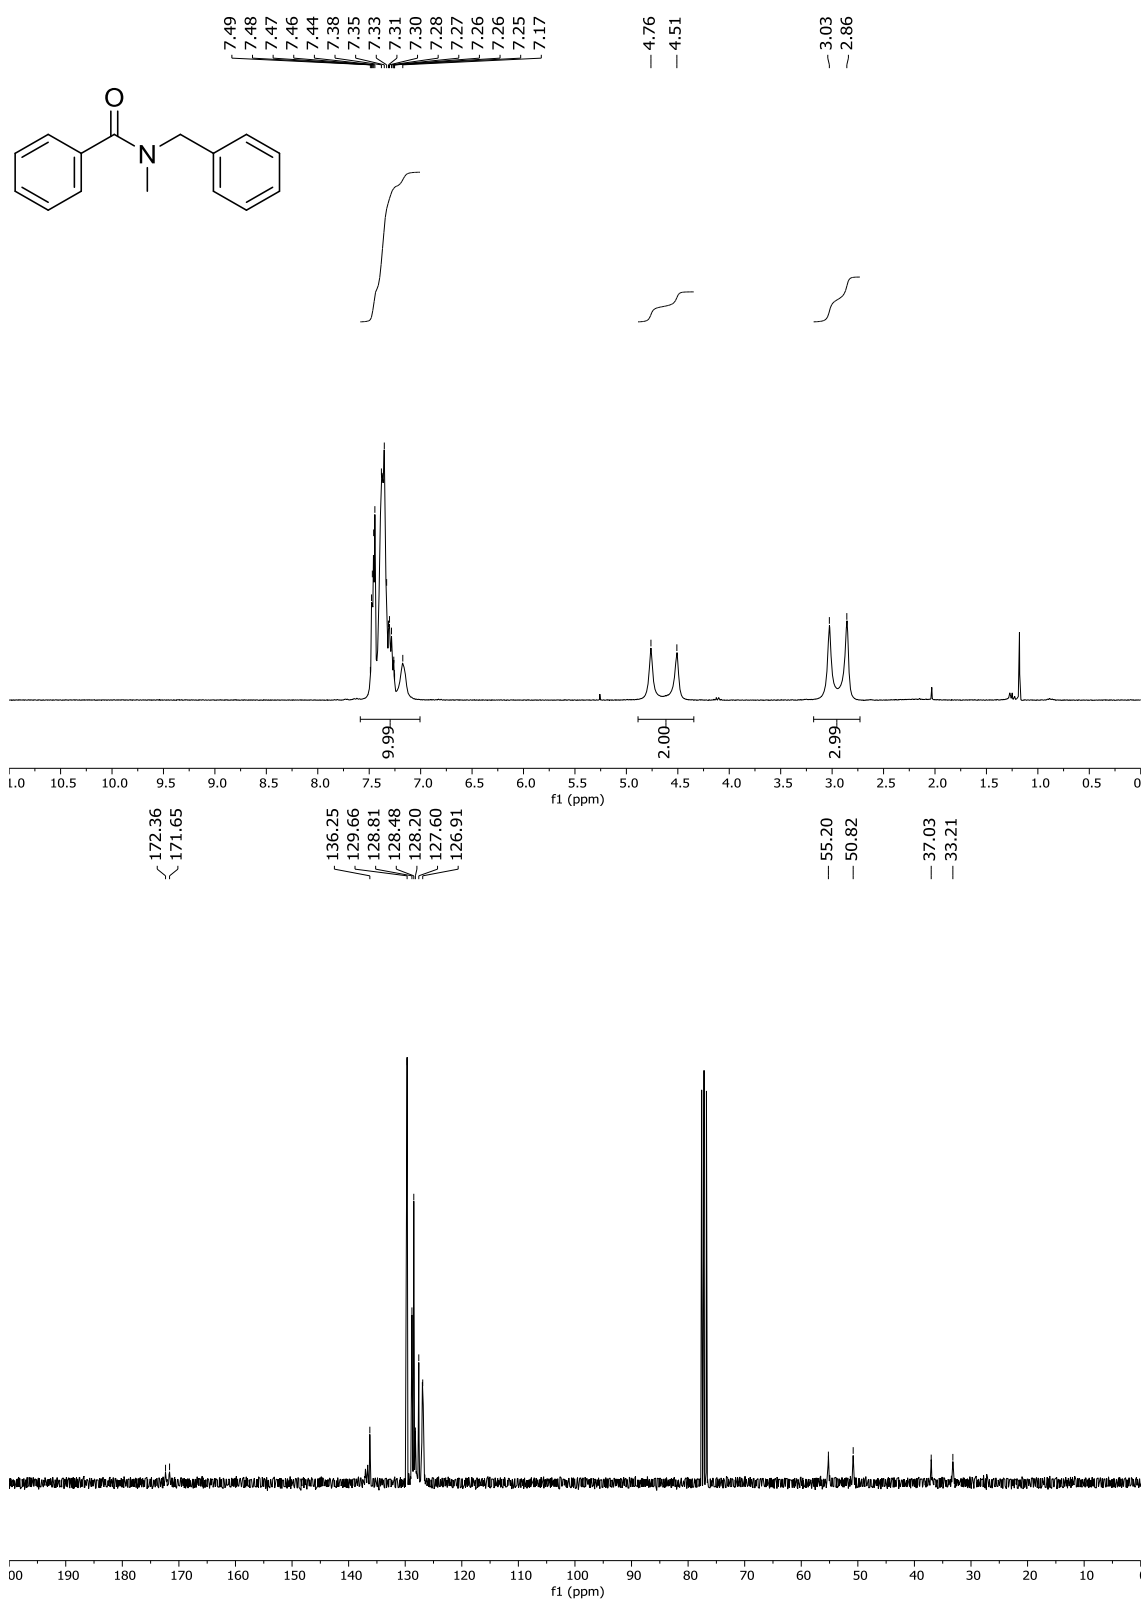

# N-(2-Bromobenzyl)-N-methylbenzamide

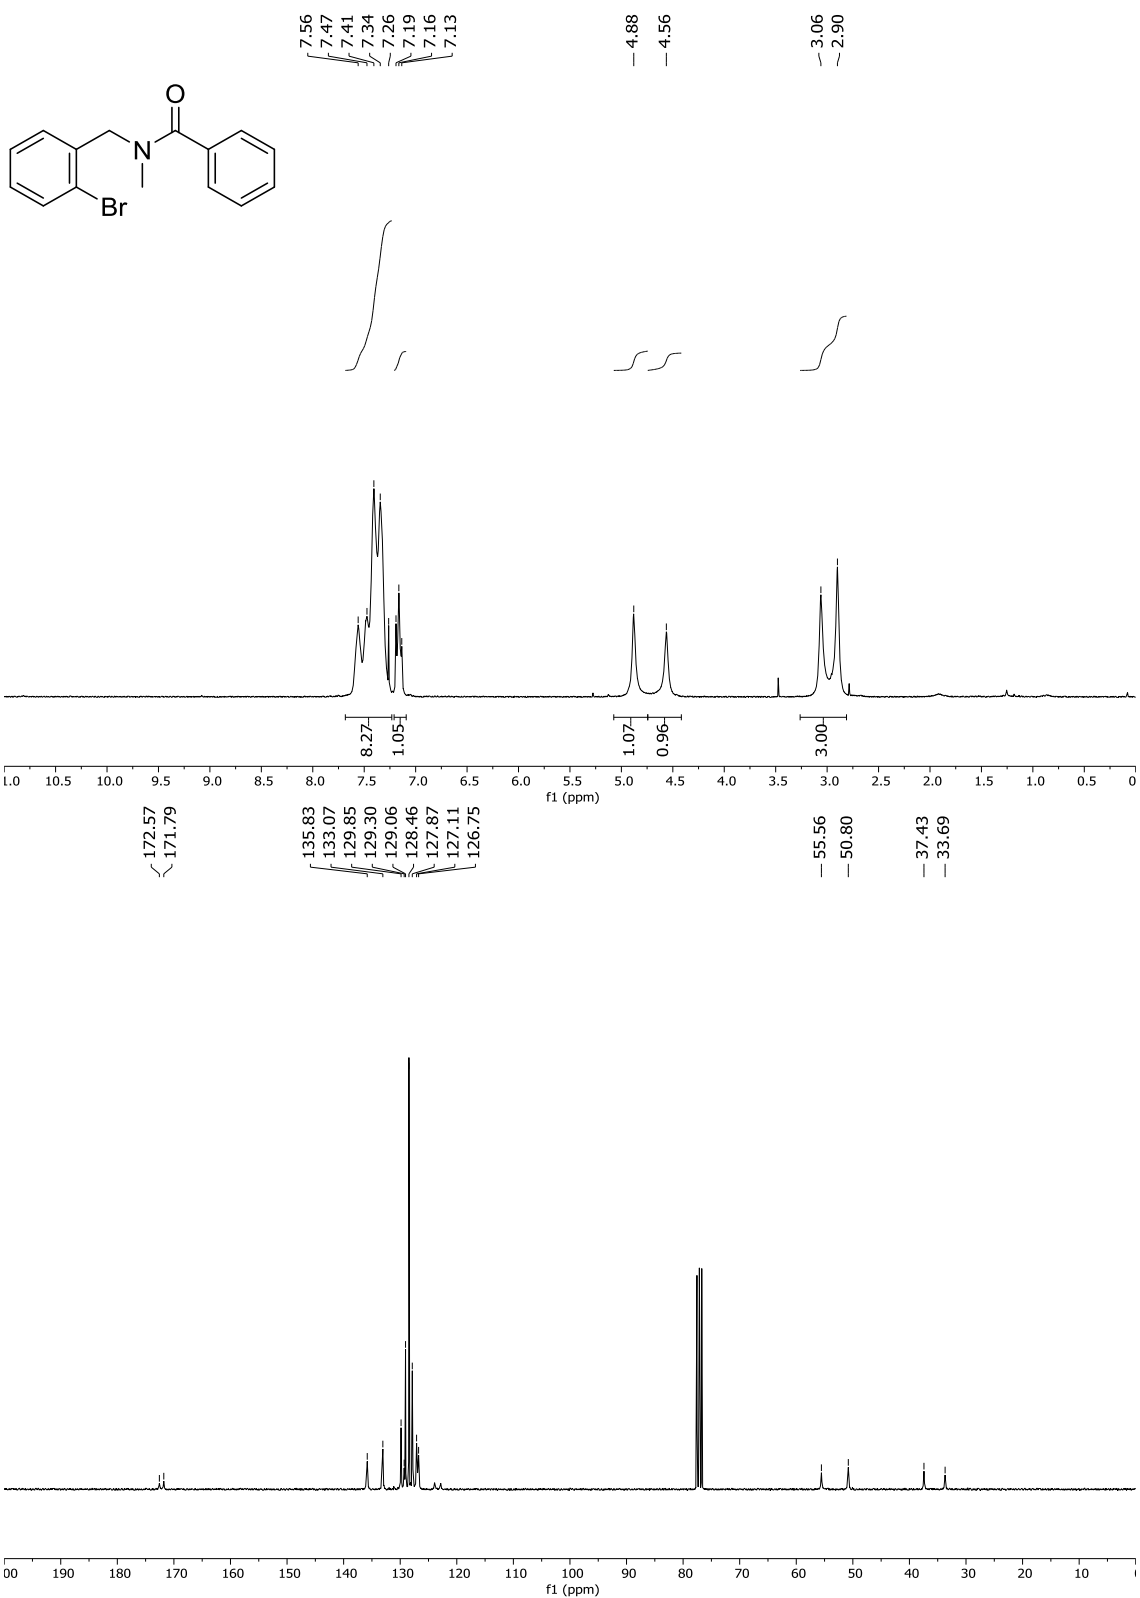



*N,N*-Dibenzylbenzamide

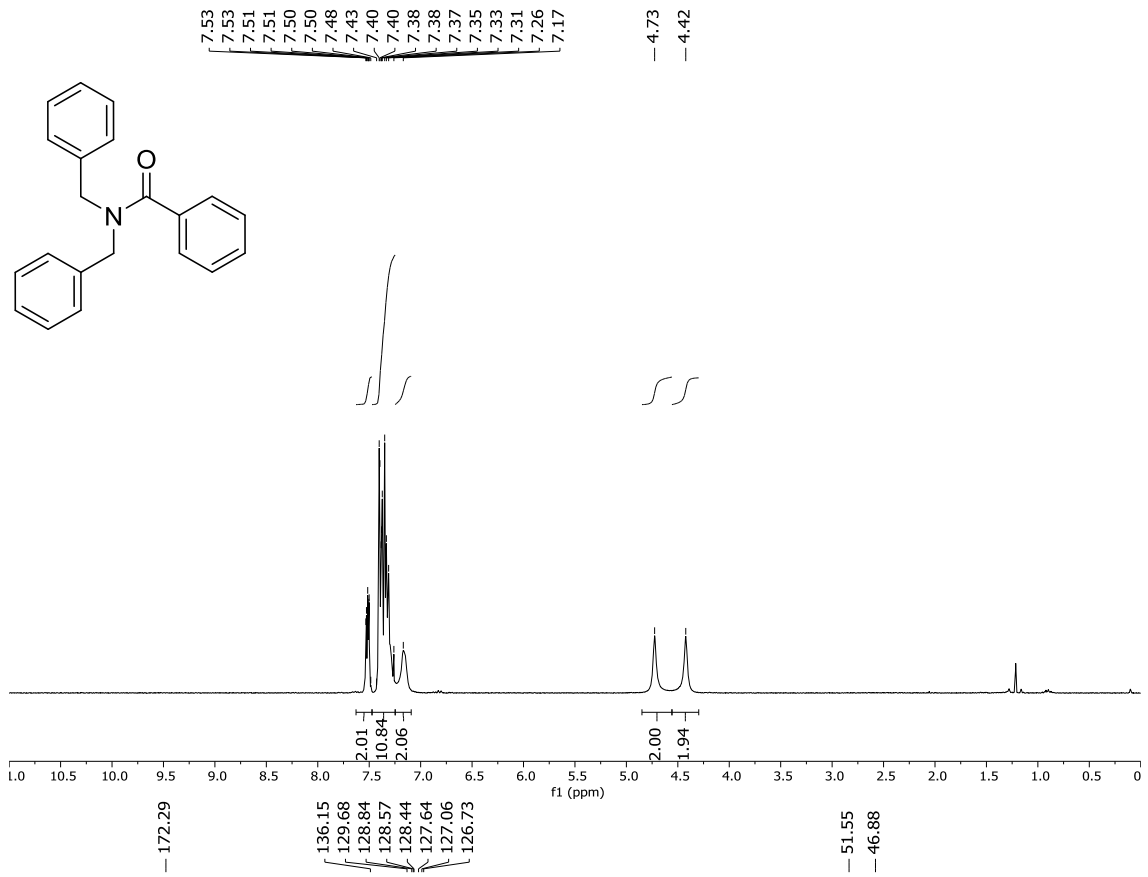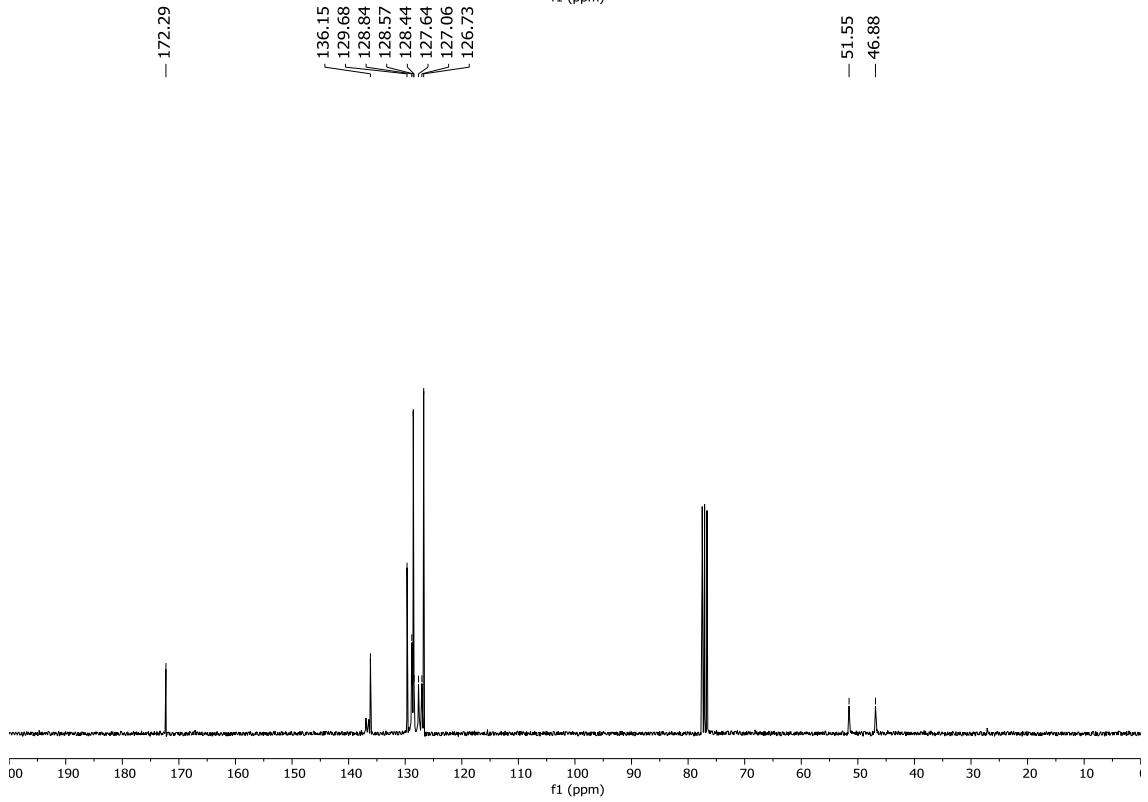

N-Benzylacetamide

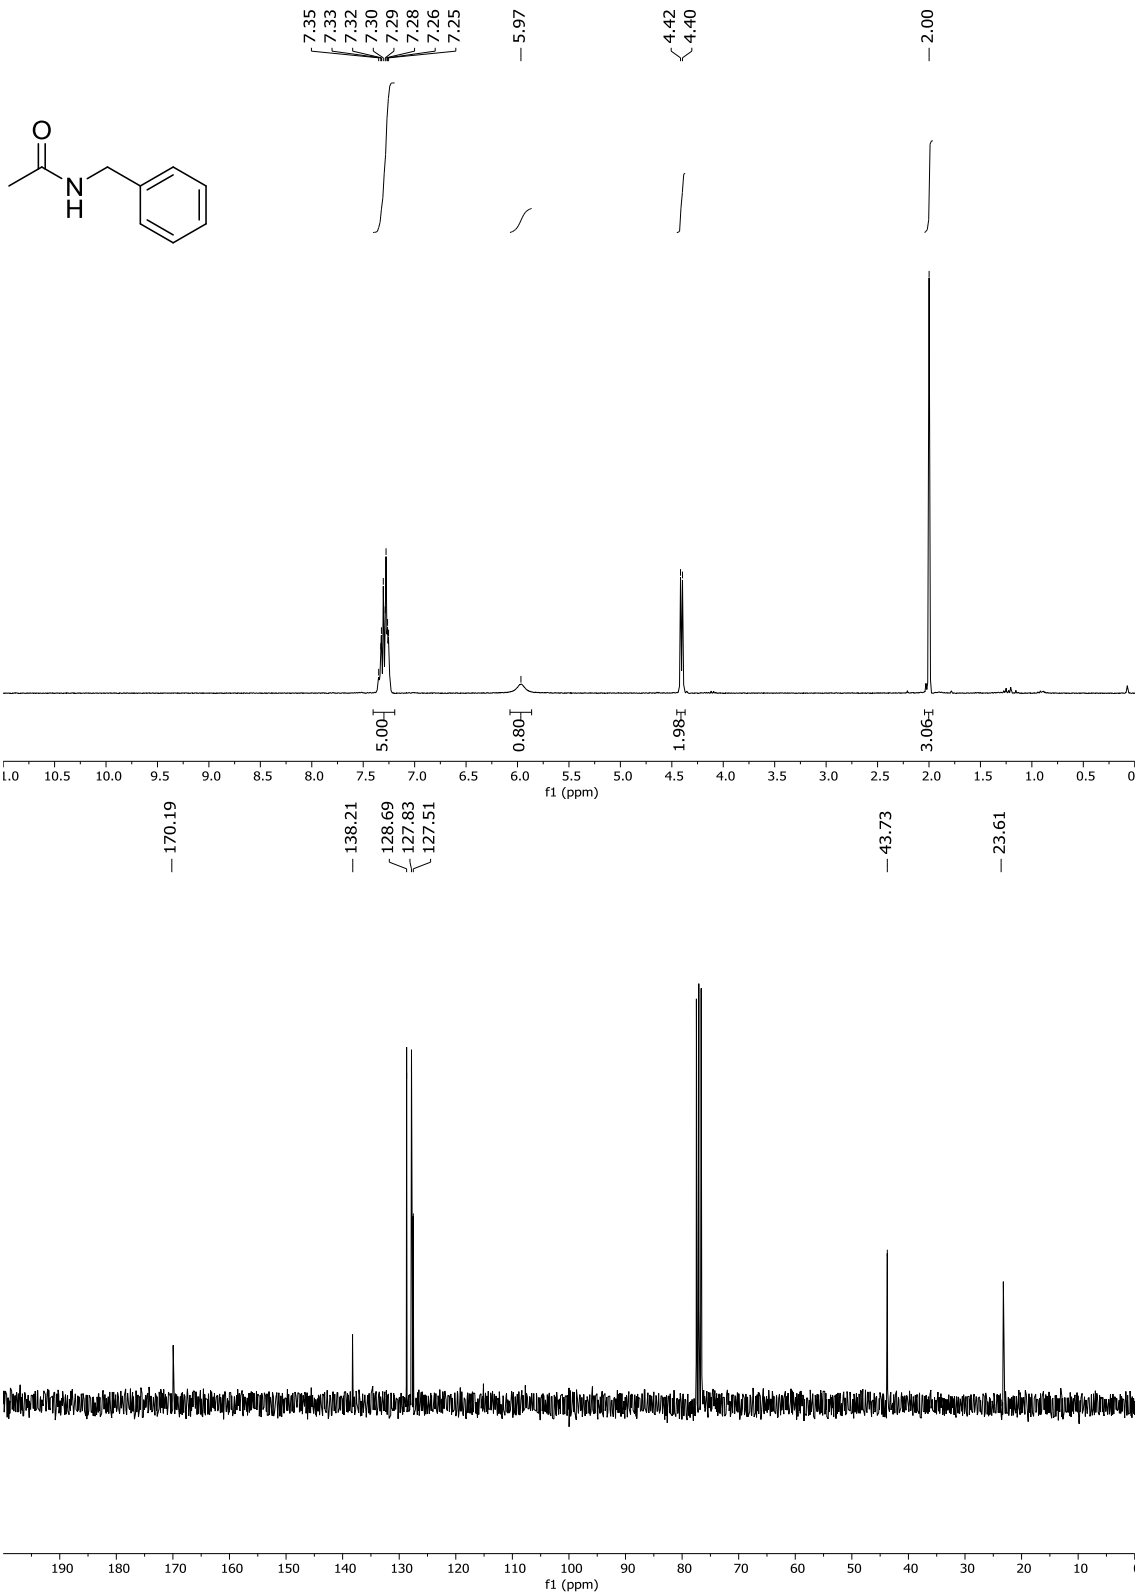

N-Benzyl-2-phenylacetamide

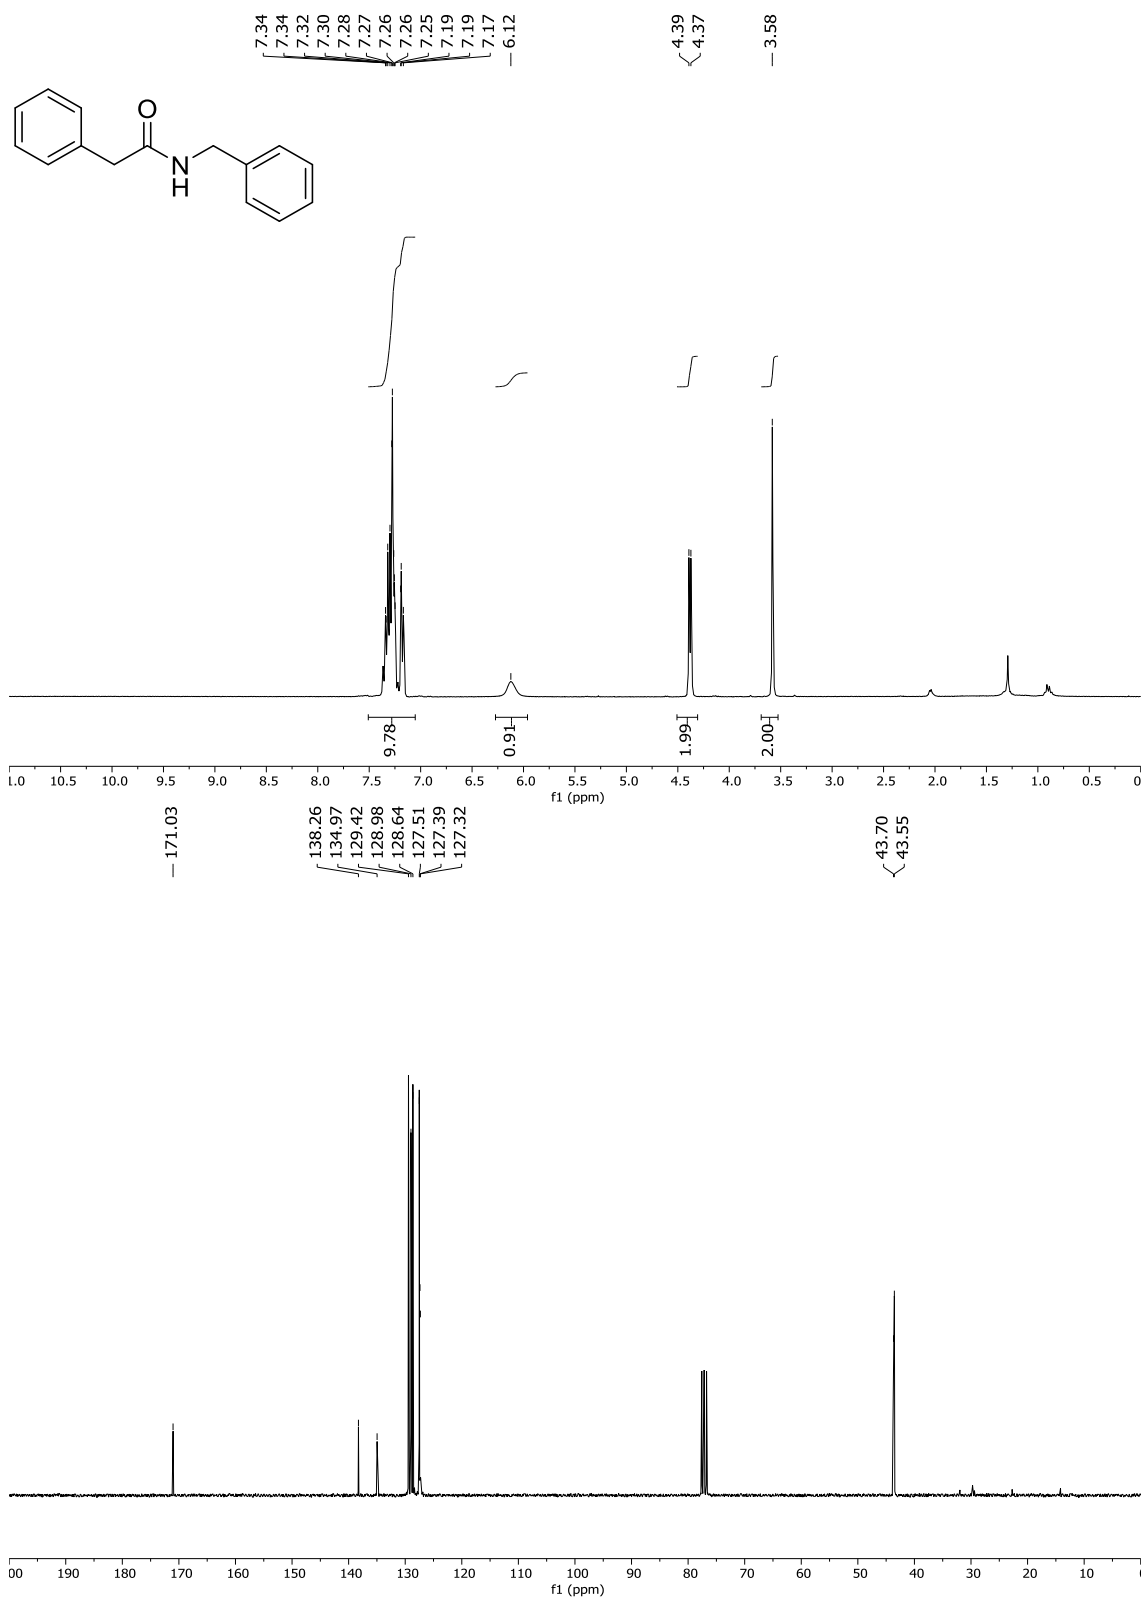

*N*-Benzyl-2-(4-methoxyphenyl)acetamide

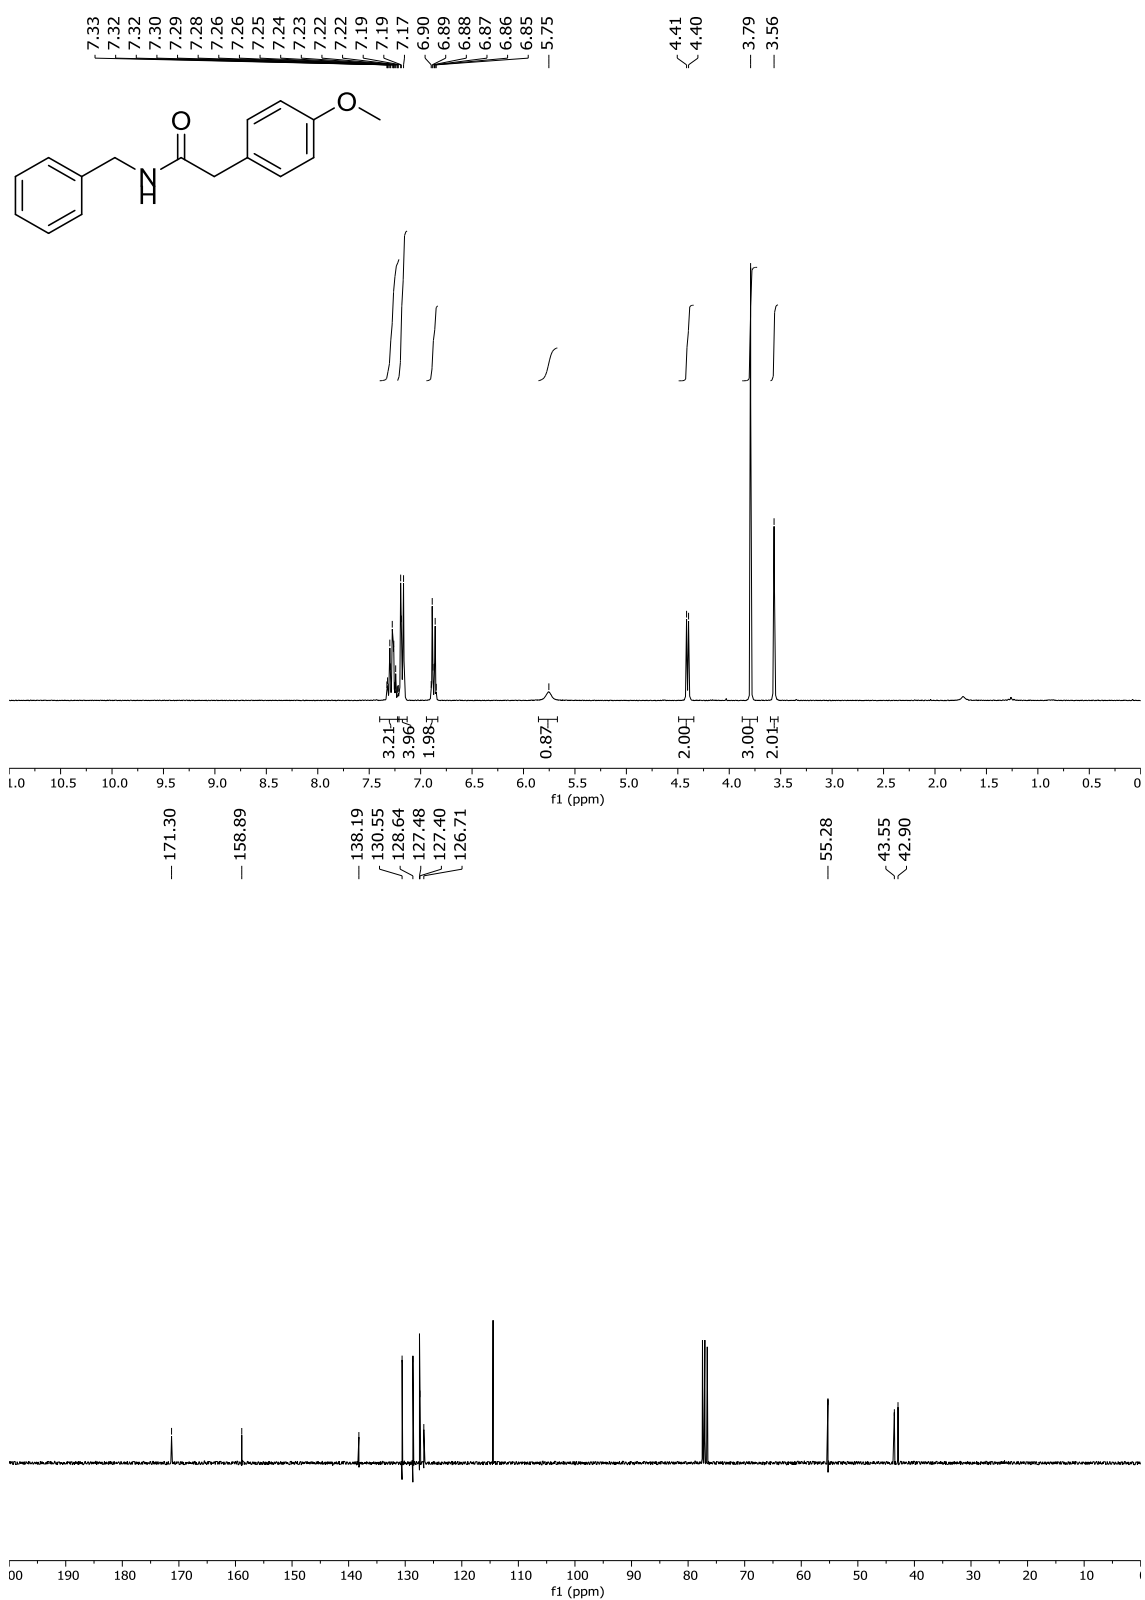

*N*-Benzyl-2-(pyridine-2-yl)acetamide

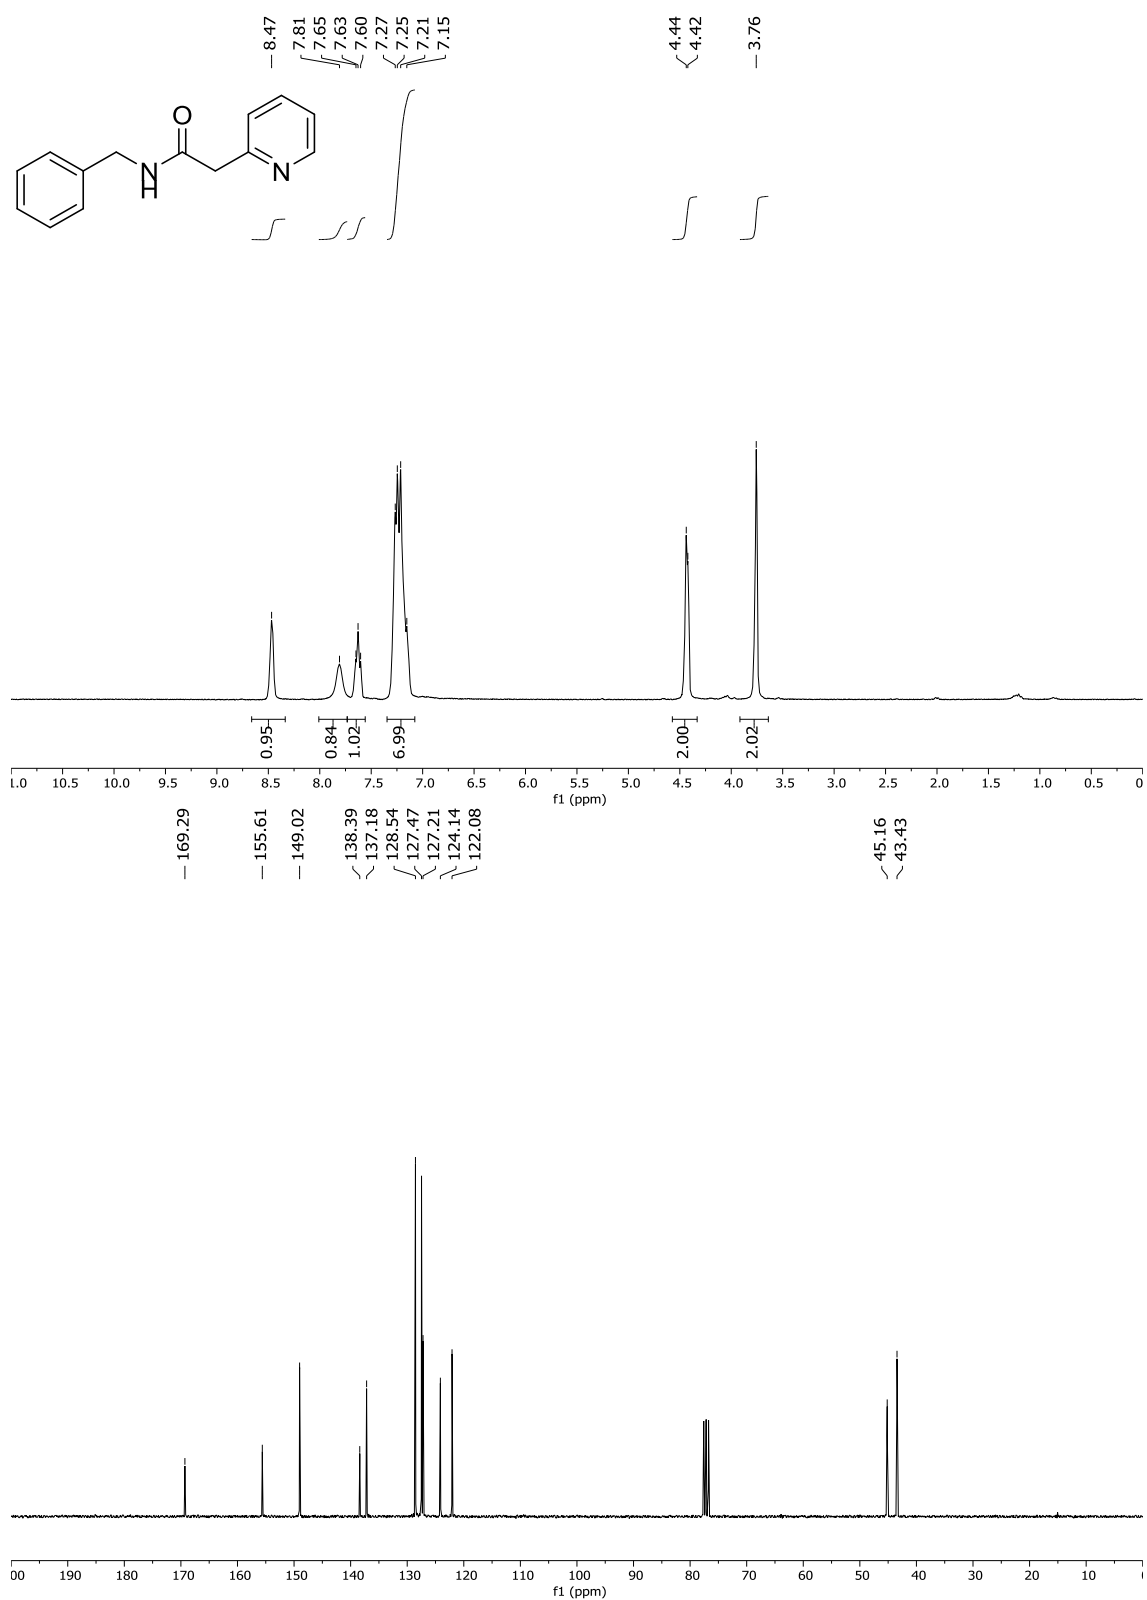

(S)-N-Benzyl-2-methoxy-2-phenylacetamide

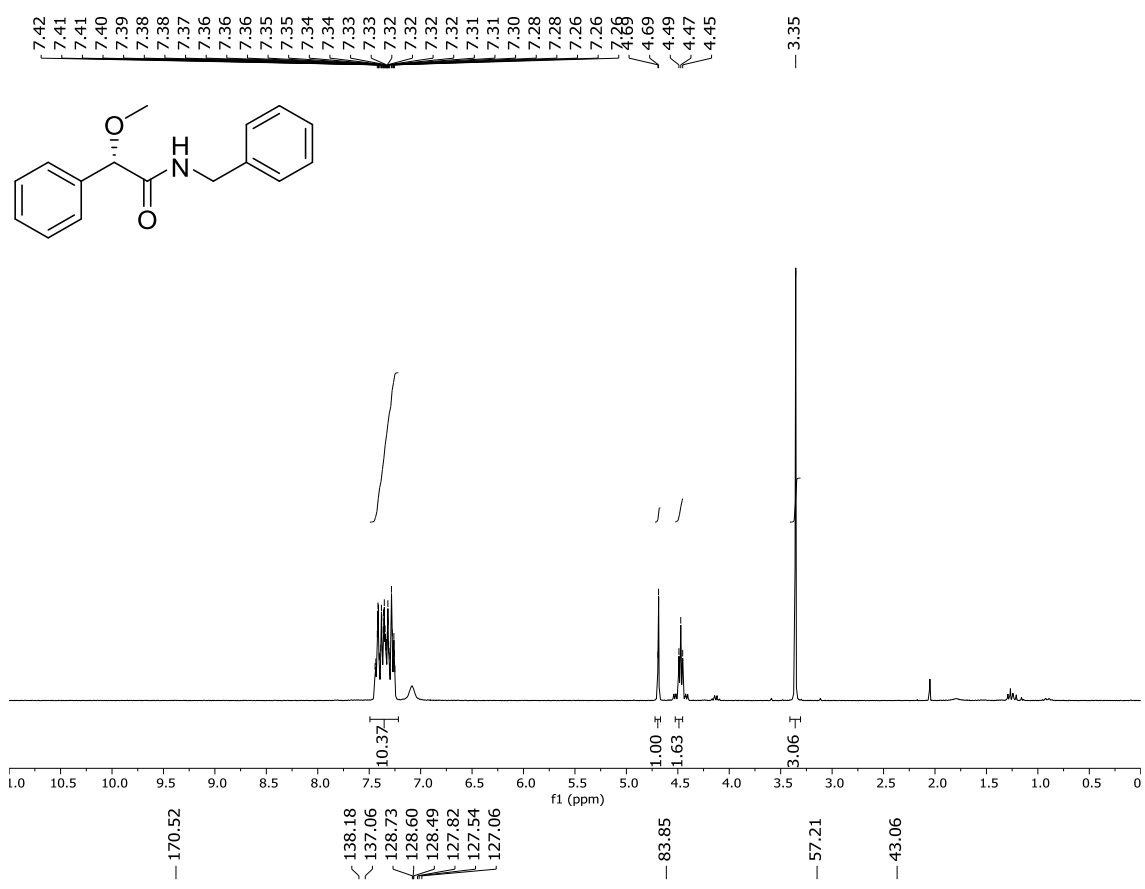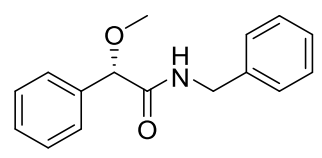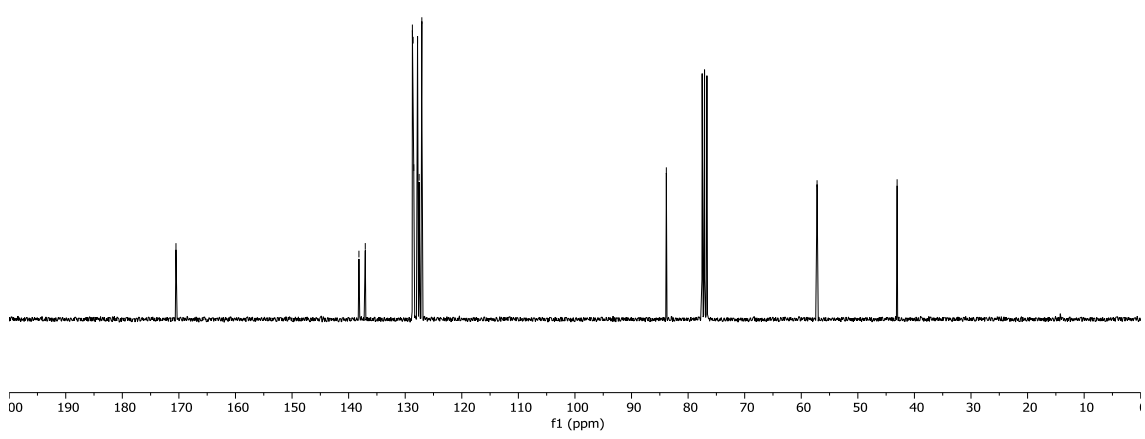

*N*-Benzyl-2-hydroxybenzamide

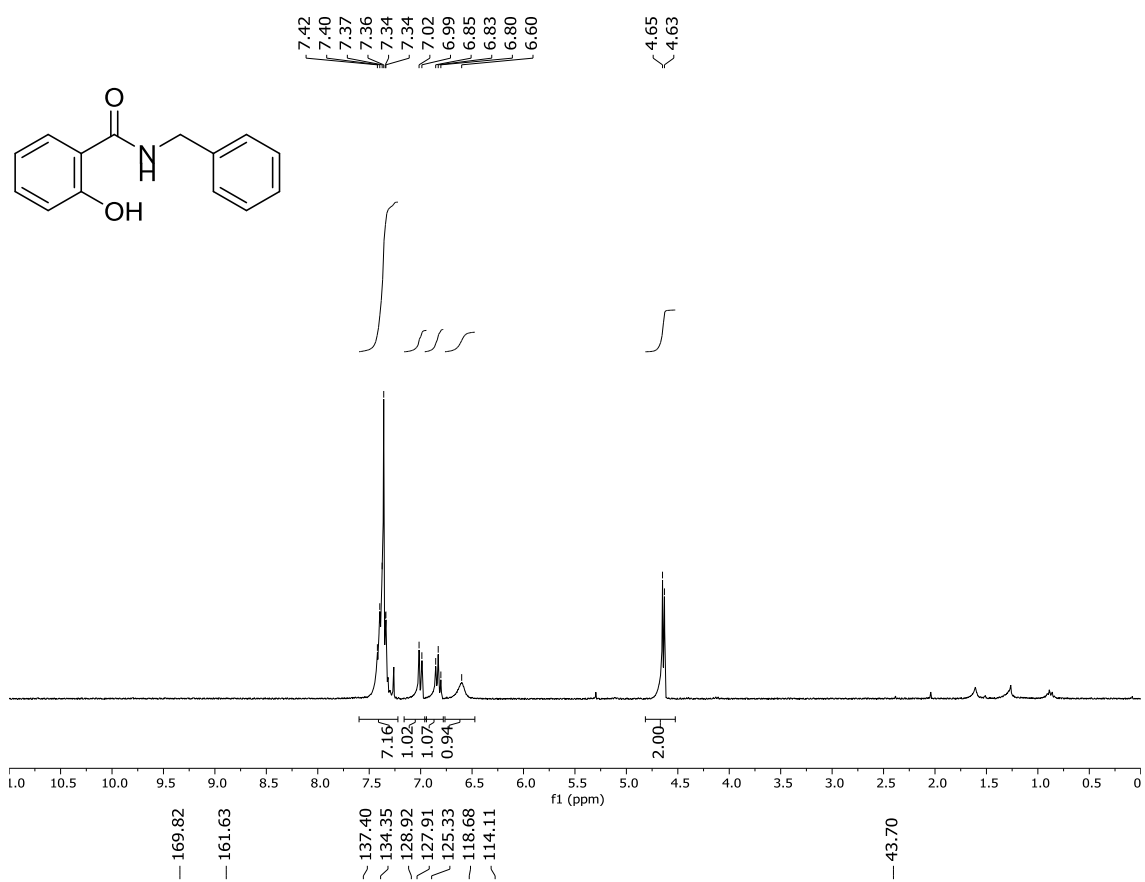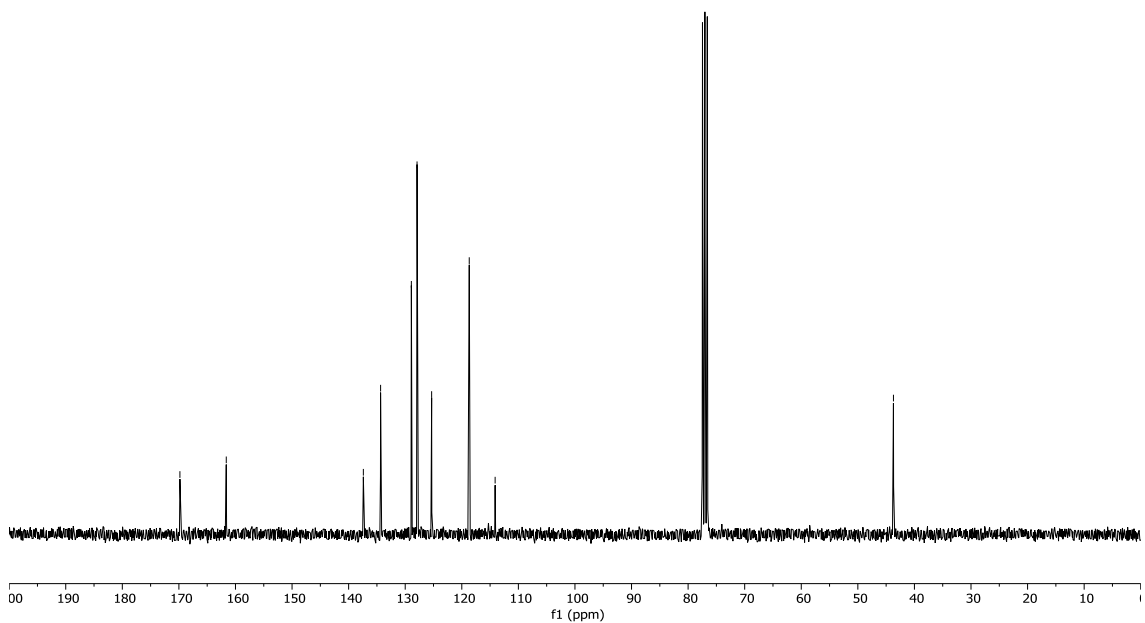

*N*-Benzyl-4-(trifluoromethyl)benzamide

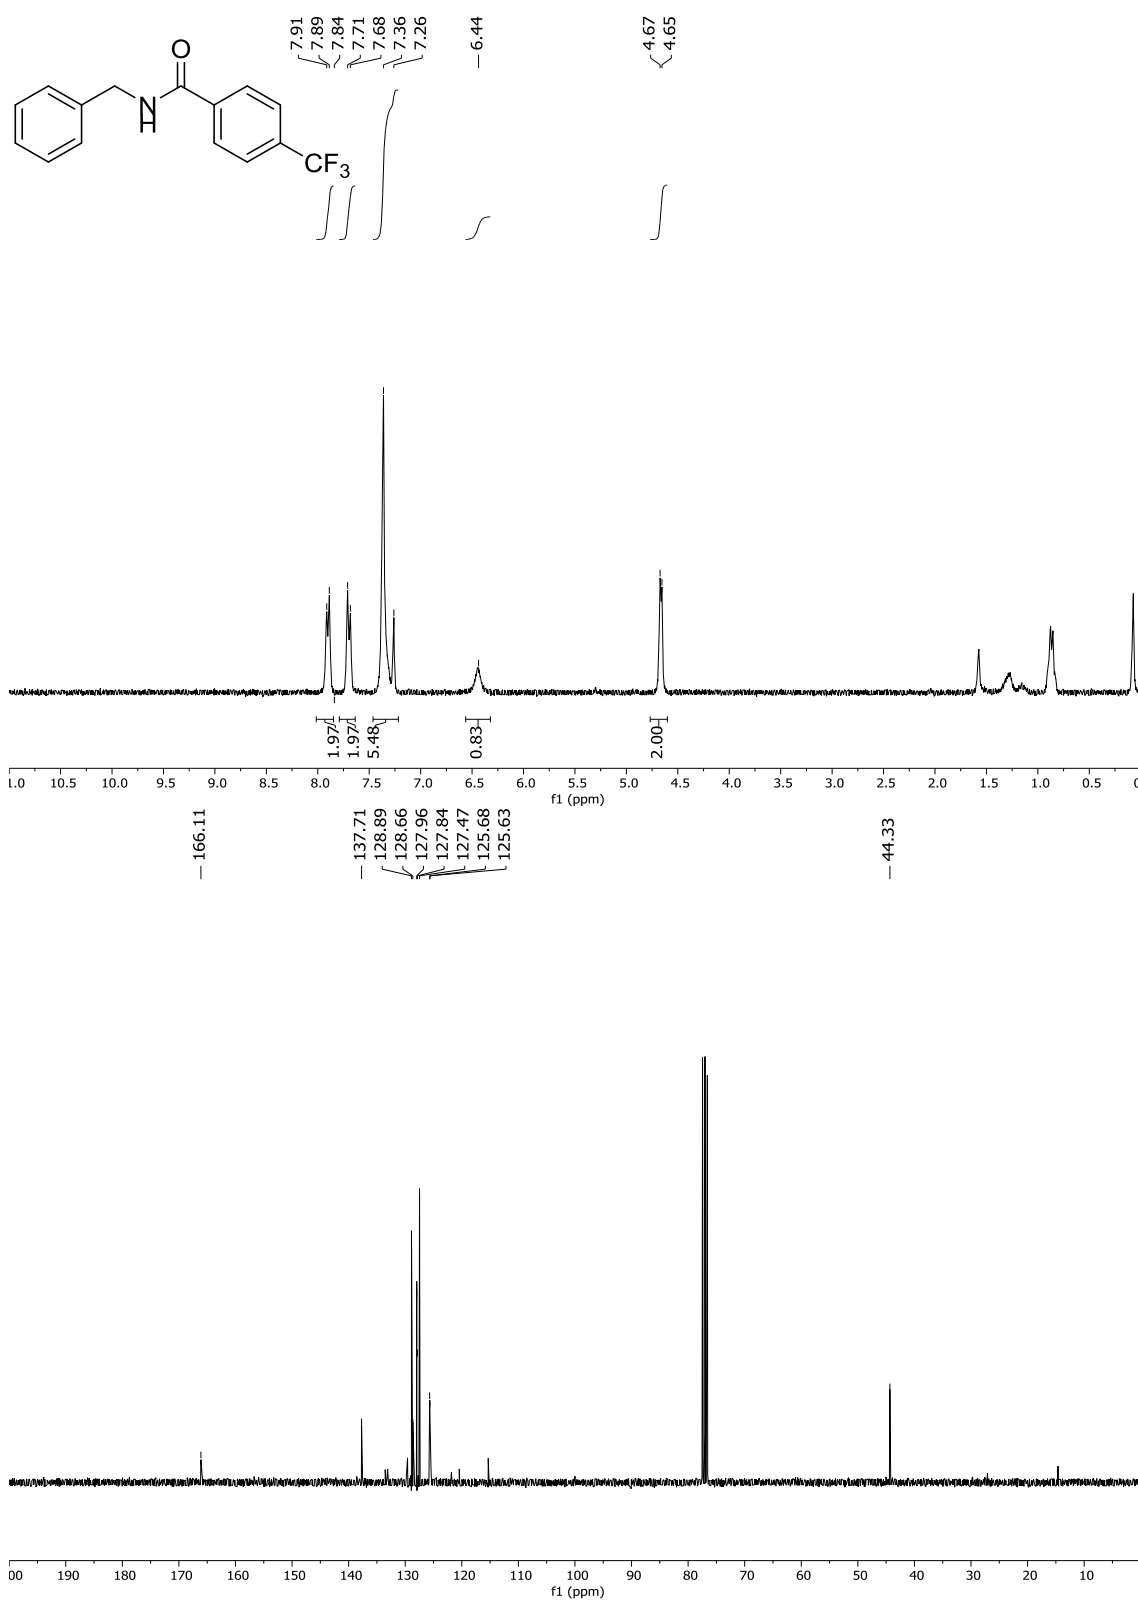



*N*-Benzyl-4-methoxy-2-methylbenzamide

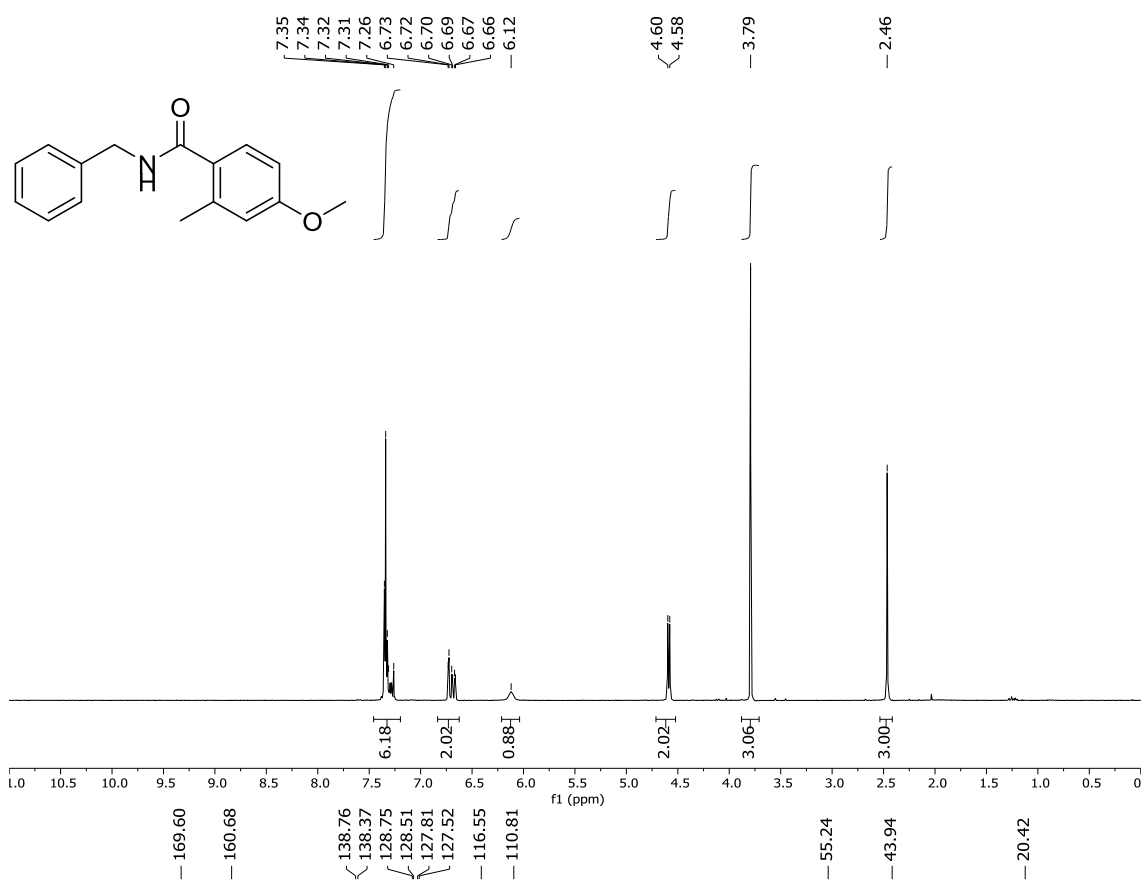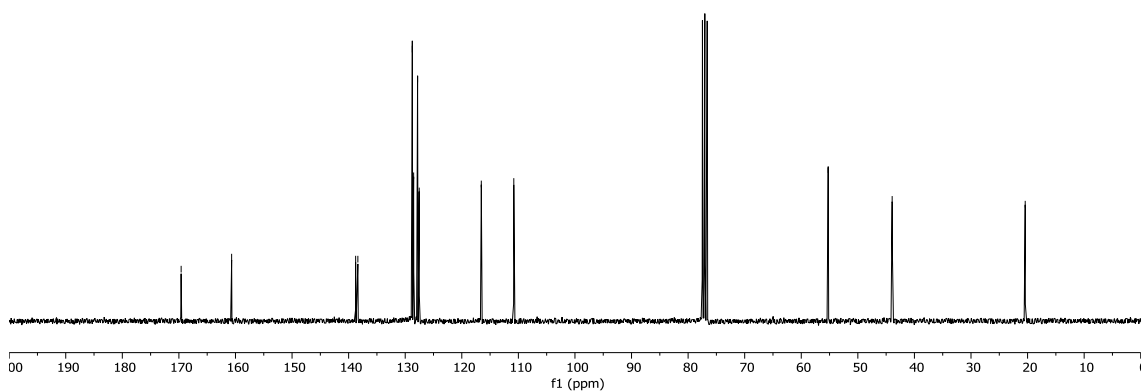

# N-Benzyl-3,4-dimethoxybenzamide

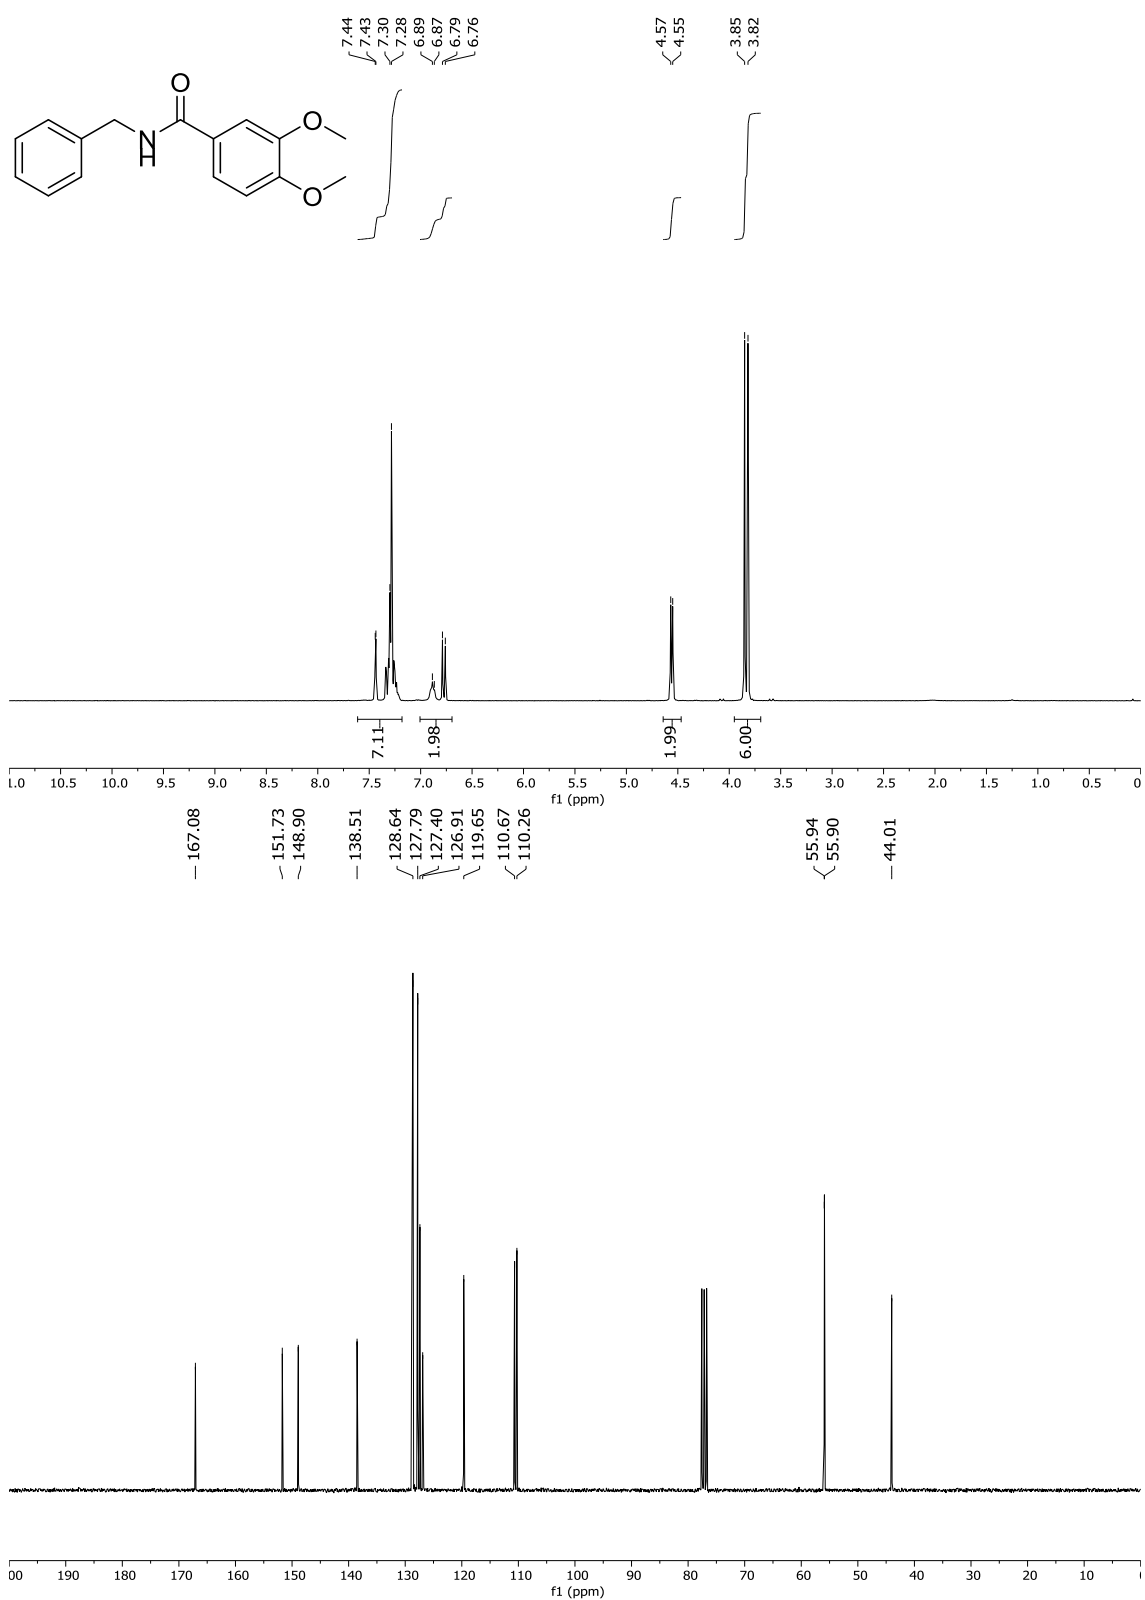

N-Benzyl-2-cyanoacetamide

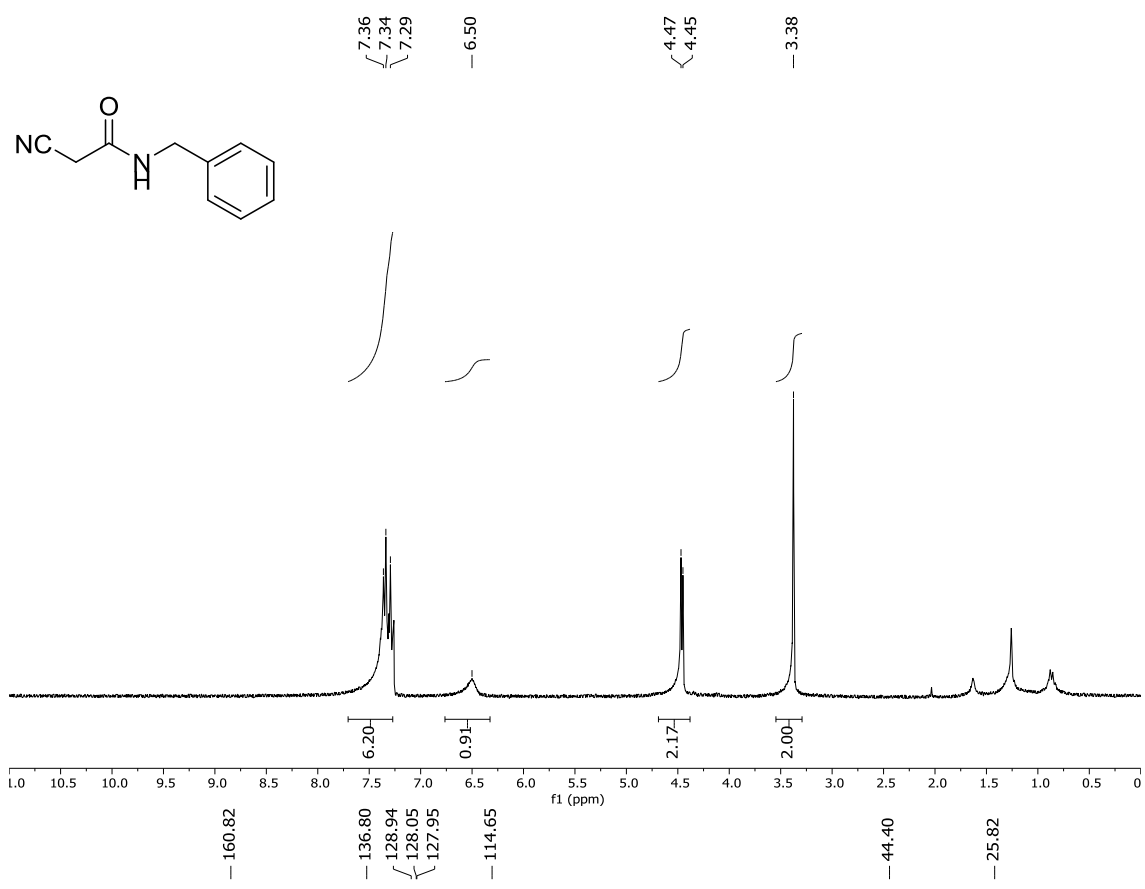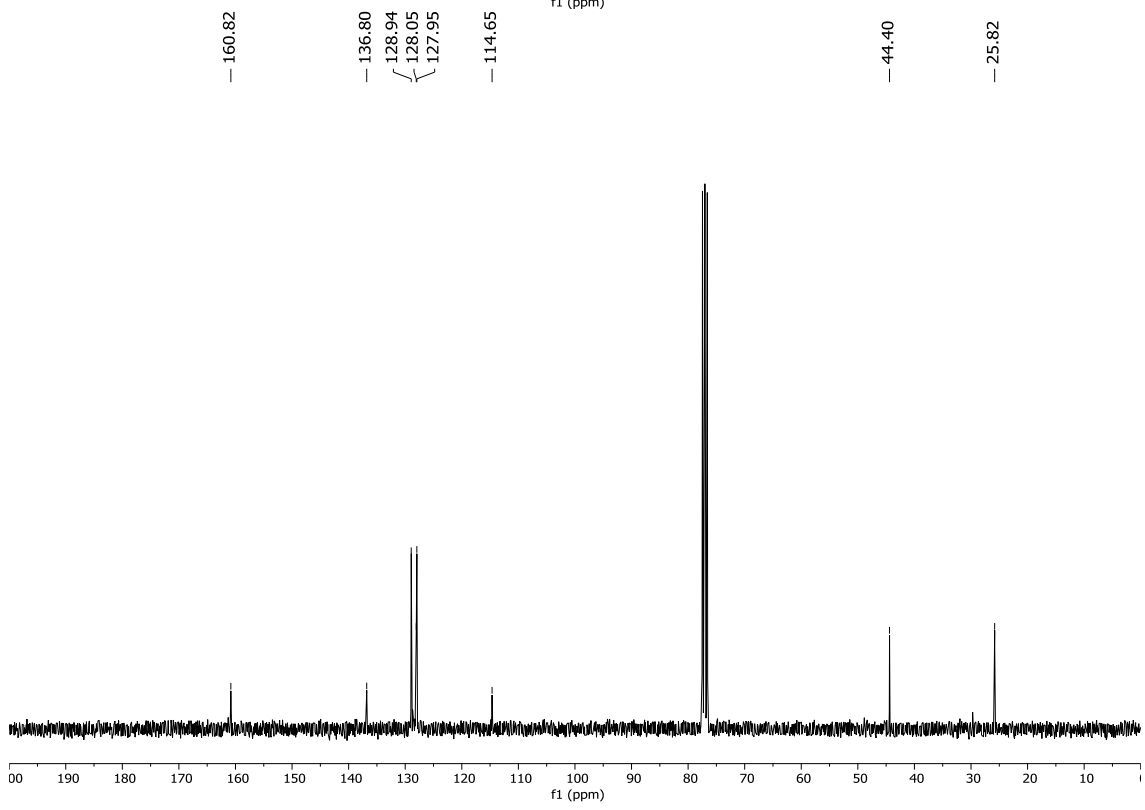

# N-Benzylformamide

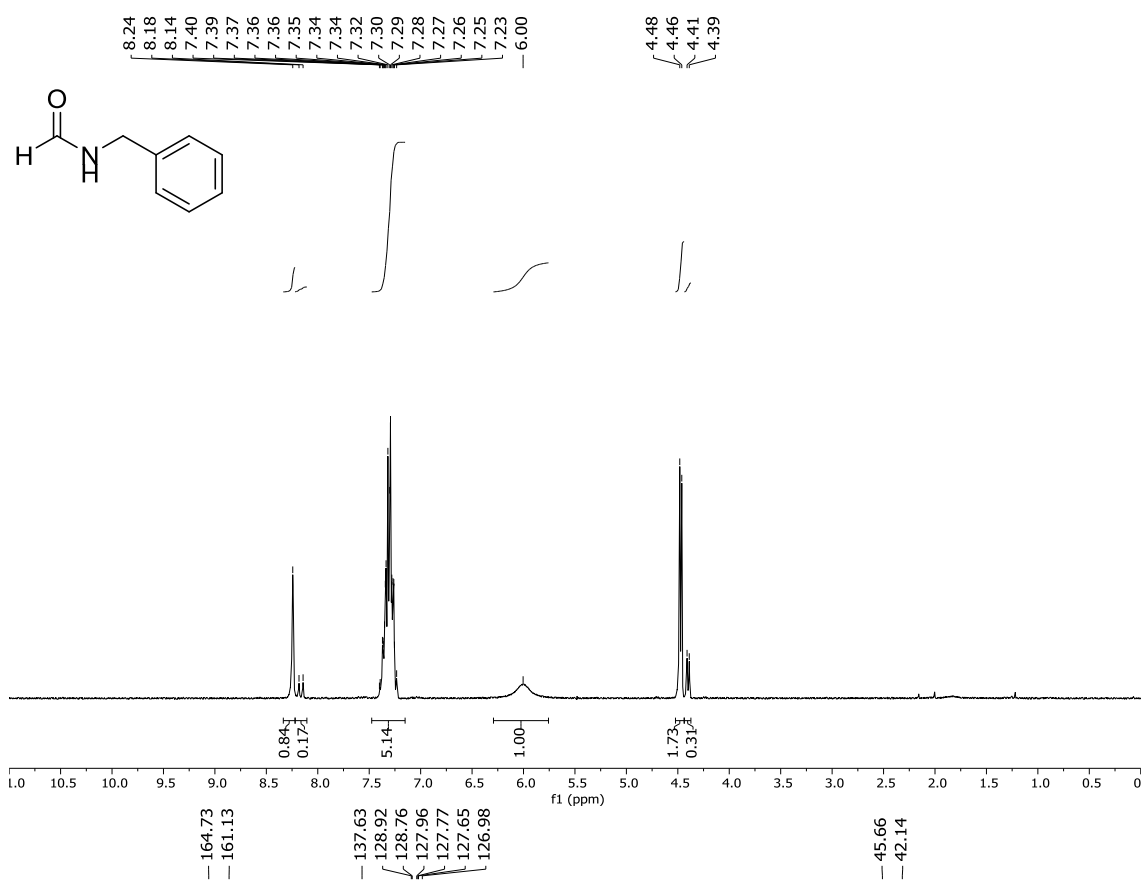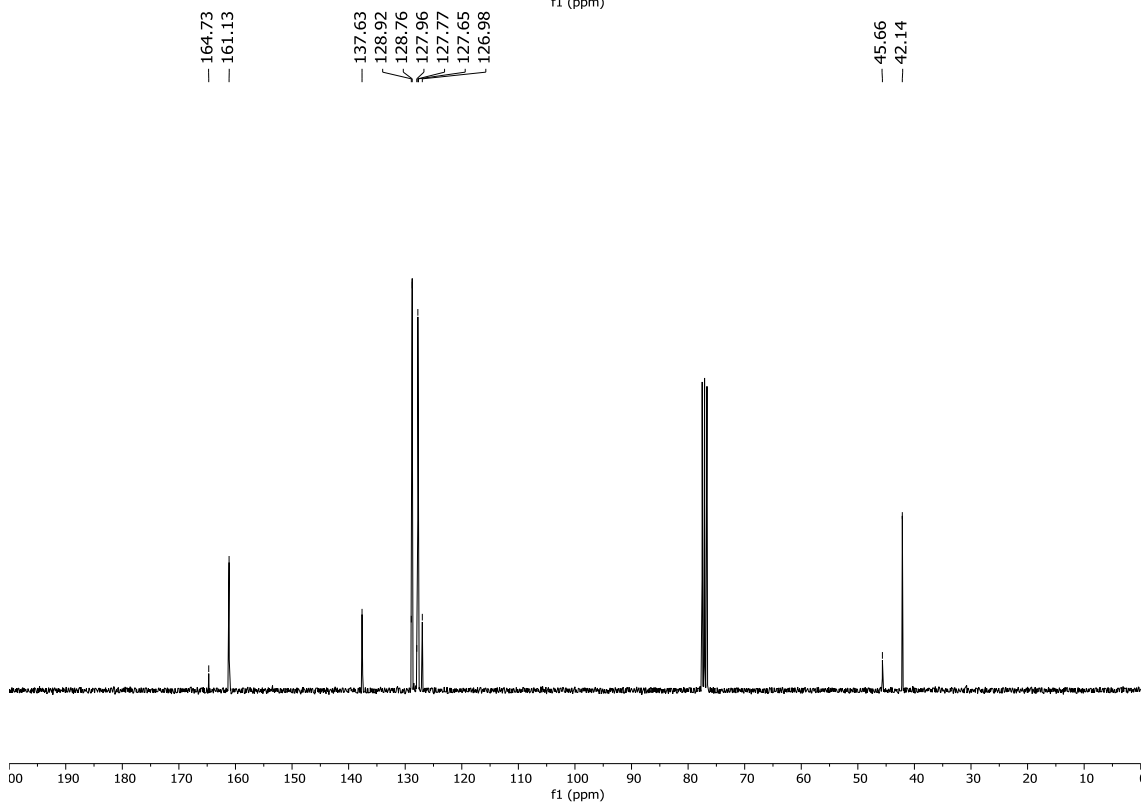

N-Benzyl-4,4-dimethyl-3-oxopentanamide

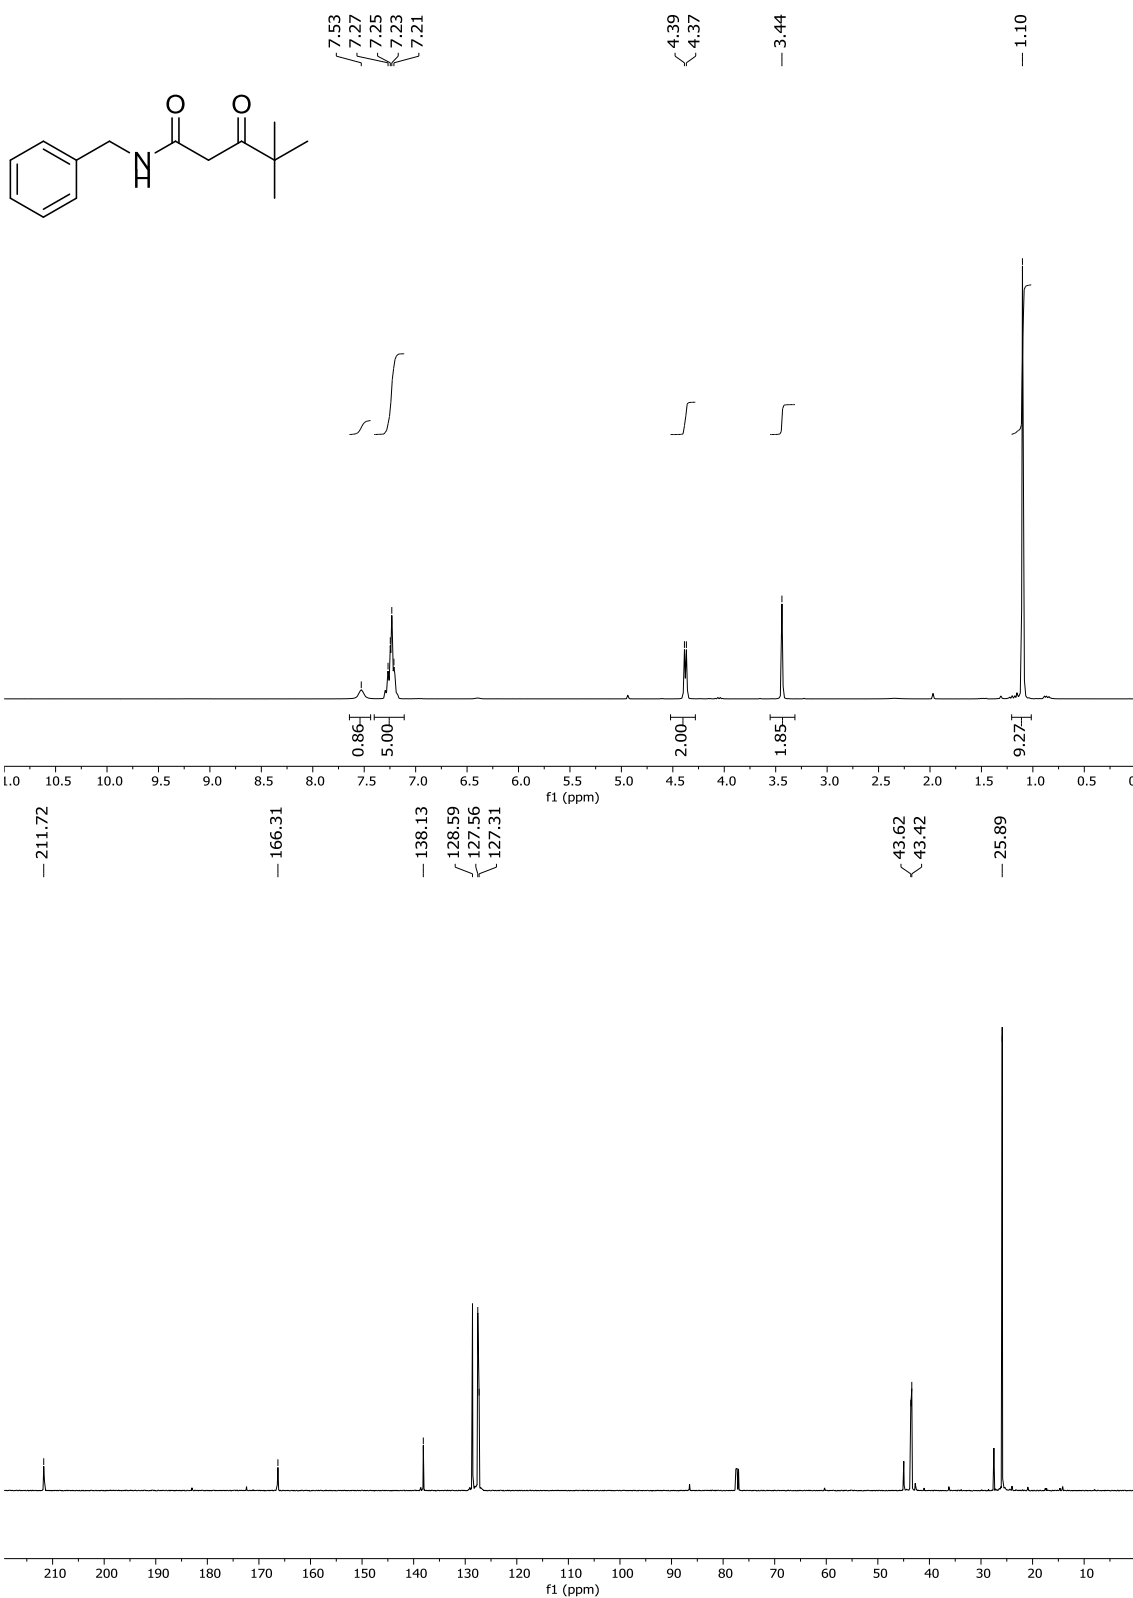

(S)-N-Benzyl-1-tosylpyrrolidine-2-carboxamide

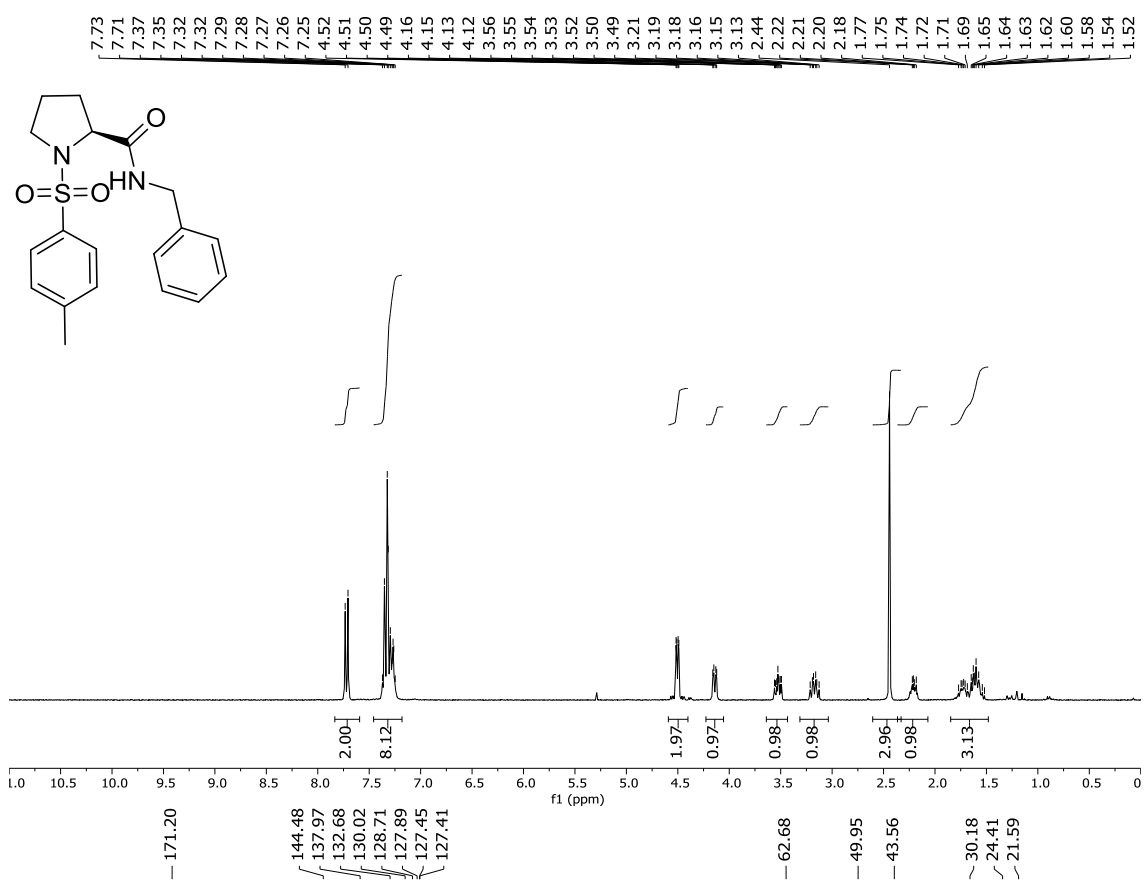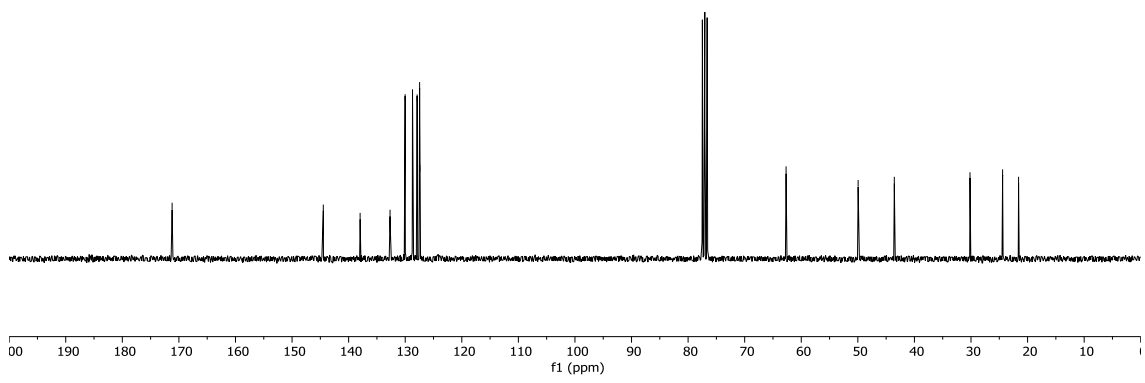

# 1-benzylpyrrolidin-2-one

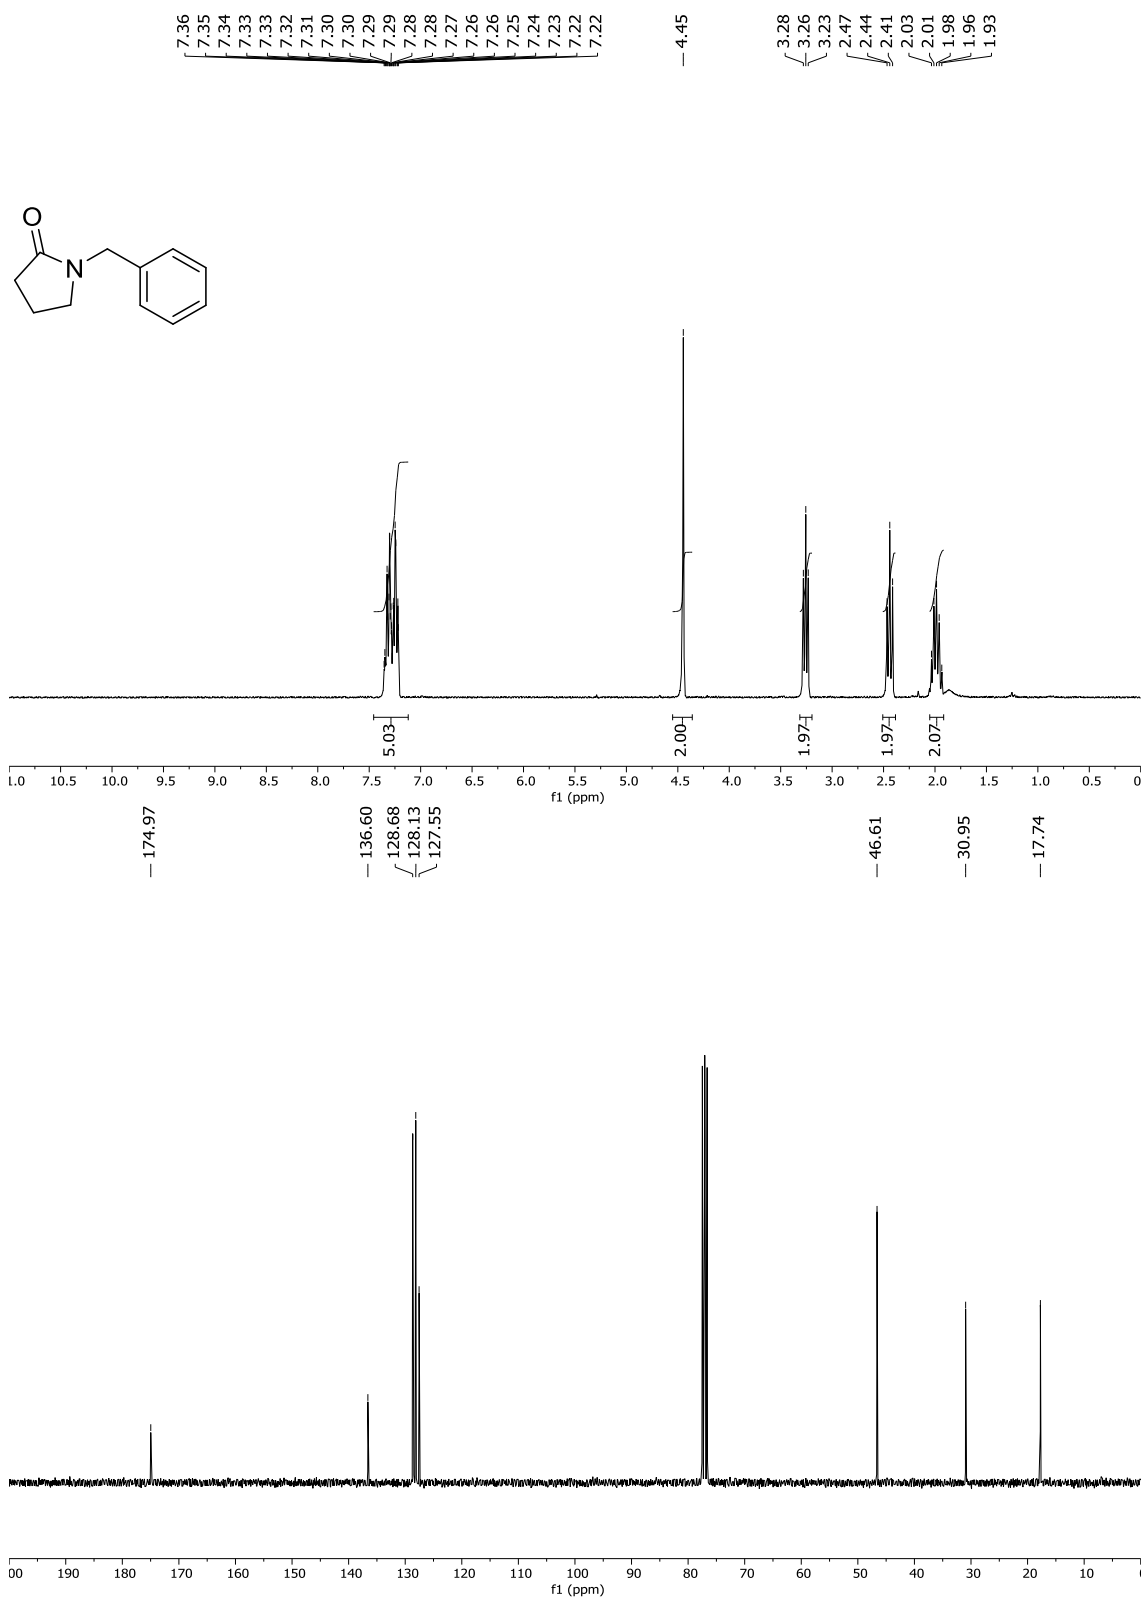

(S)-2-methoxy-2-phenyl-N-((S)-1-phenylethyl)acetamide

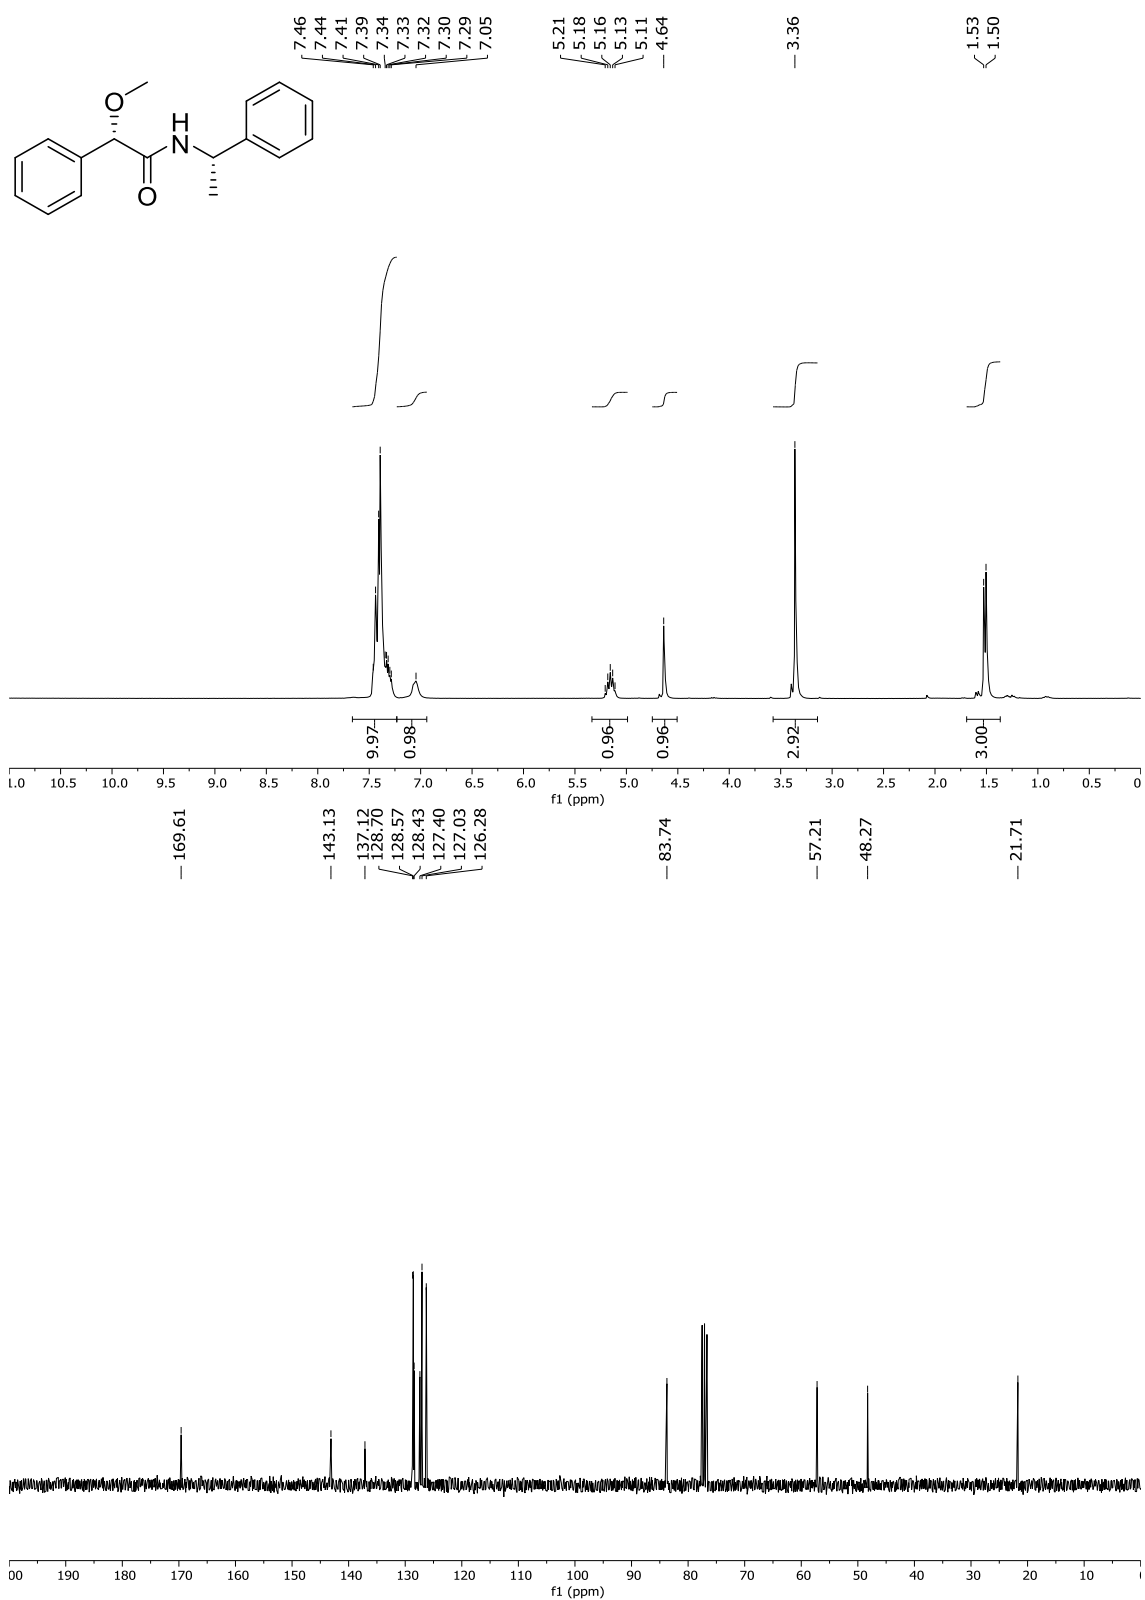



N-Phenylacetamide

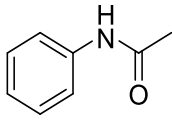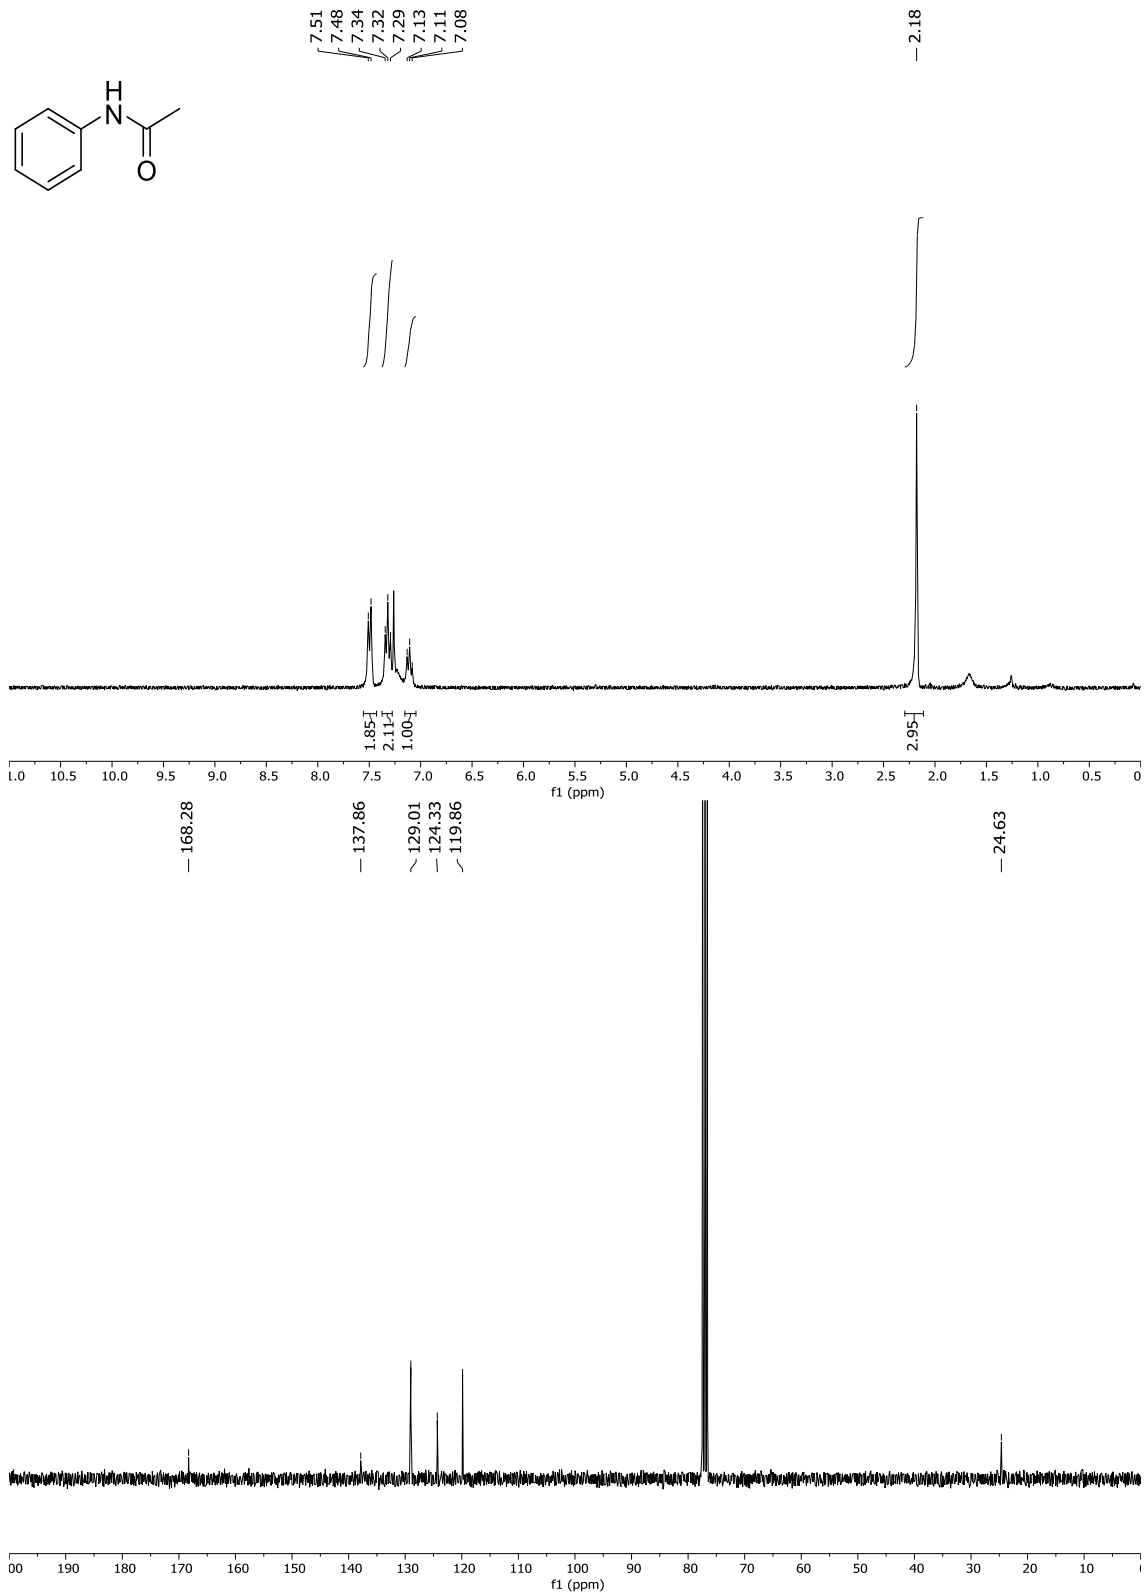

N-(4-Ethylphenyl)acetamide

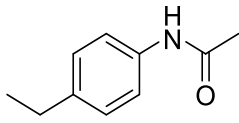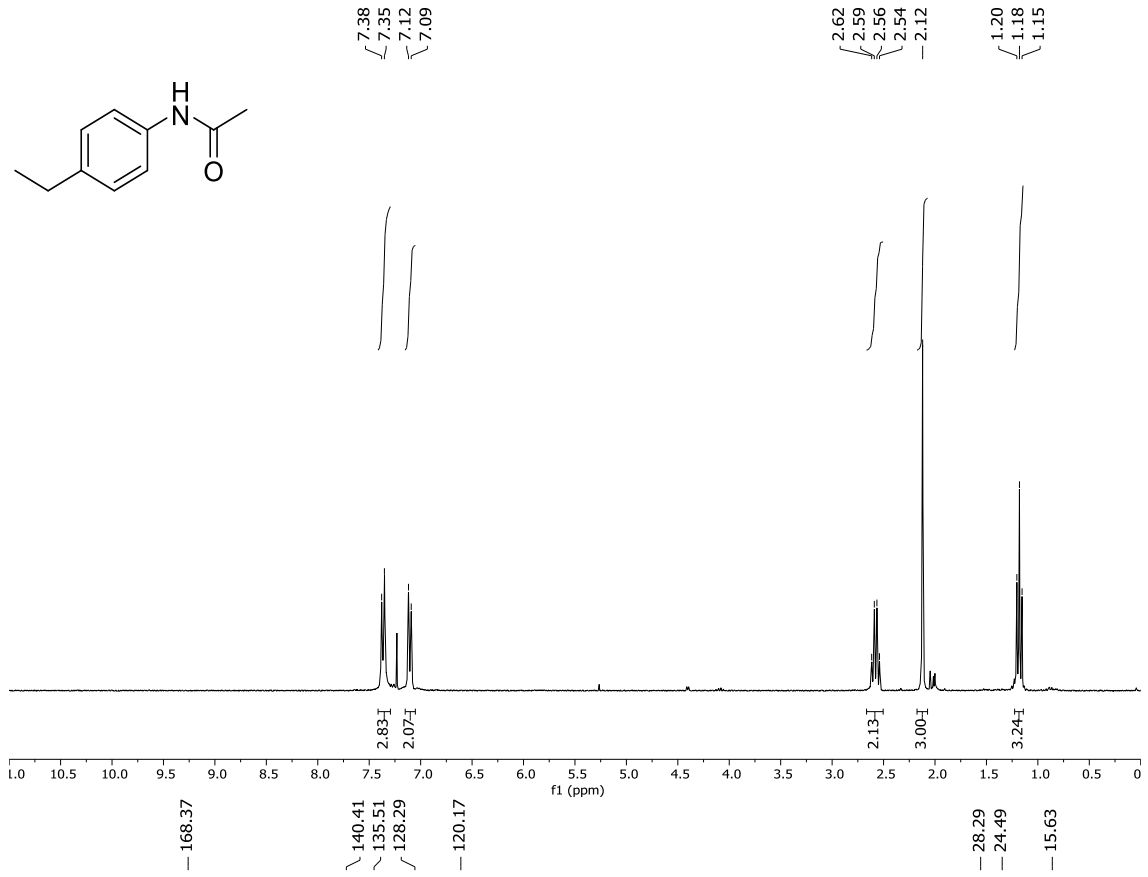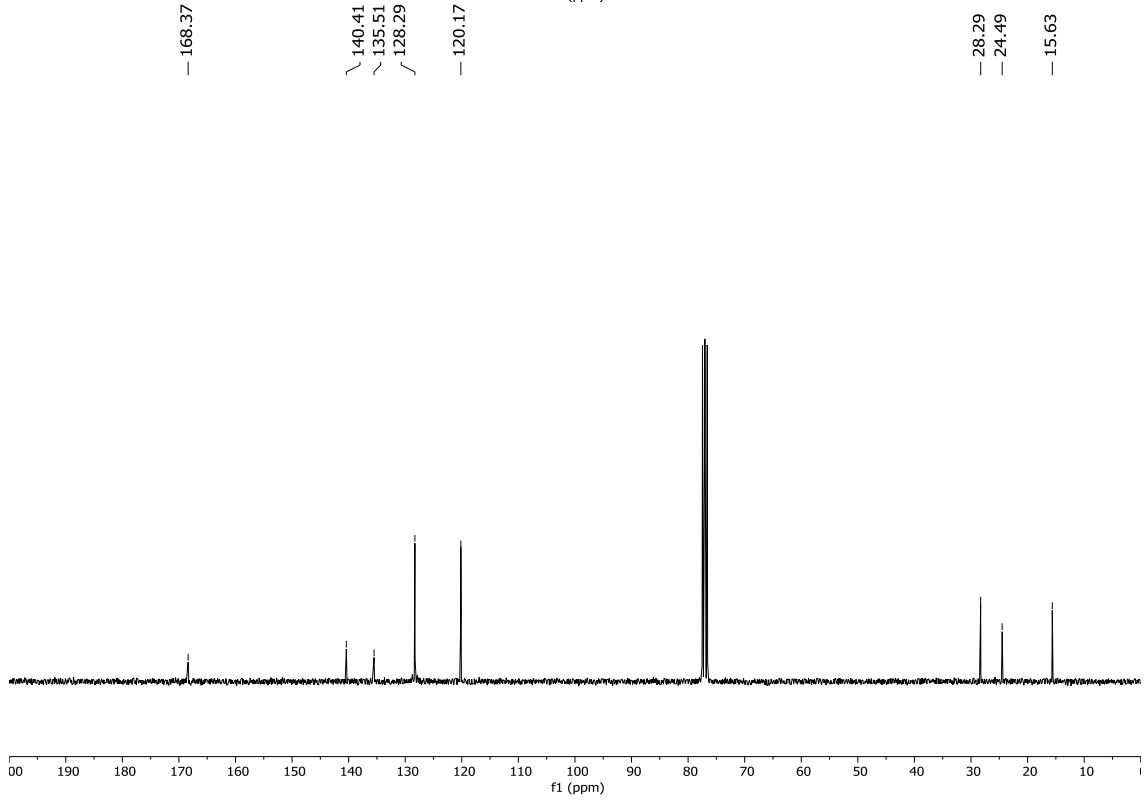

N-(4-(trifluoromethyl)phenyl)acetamide

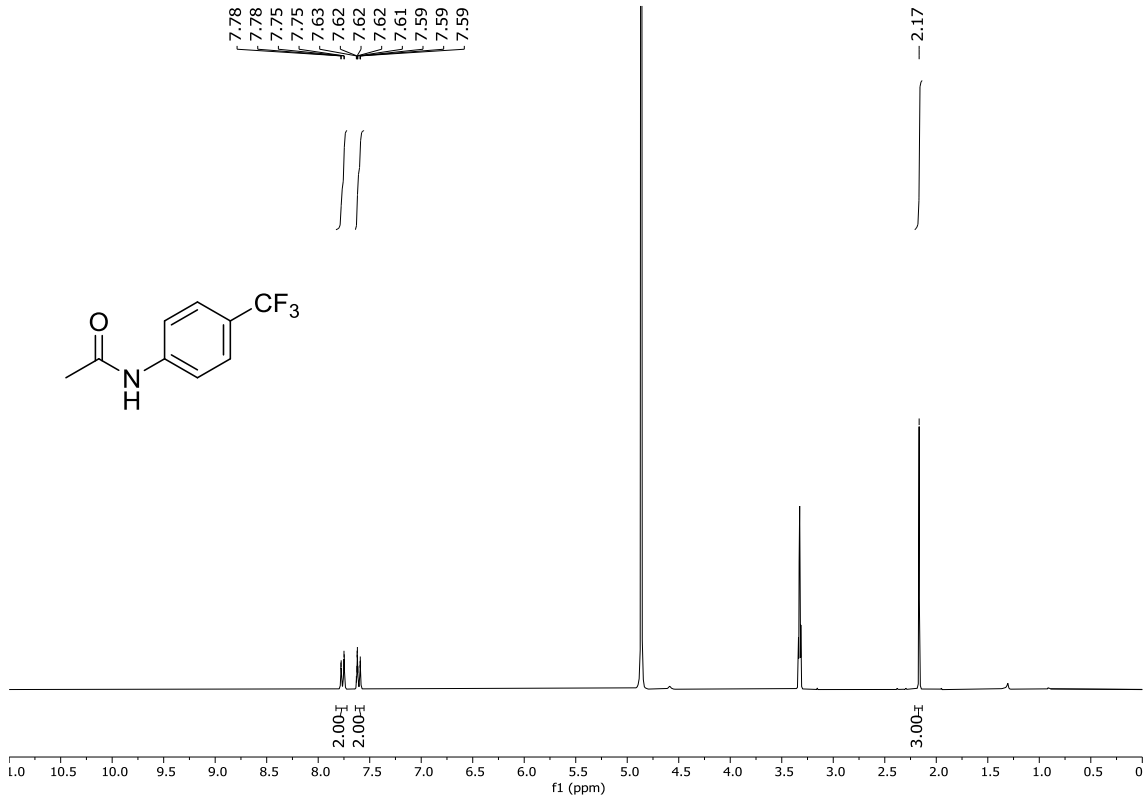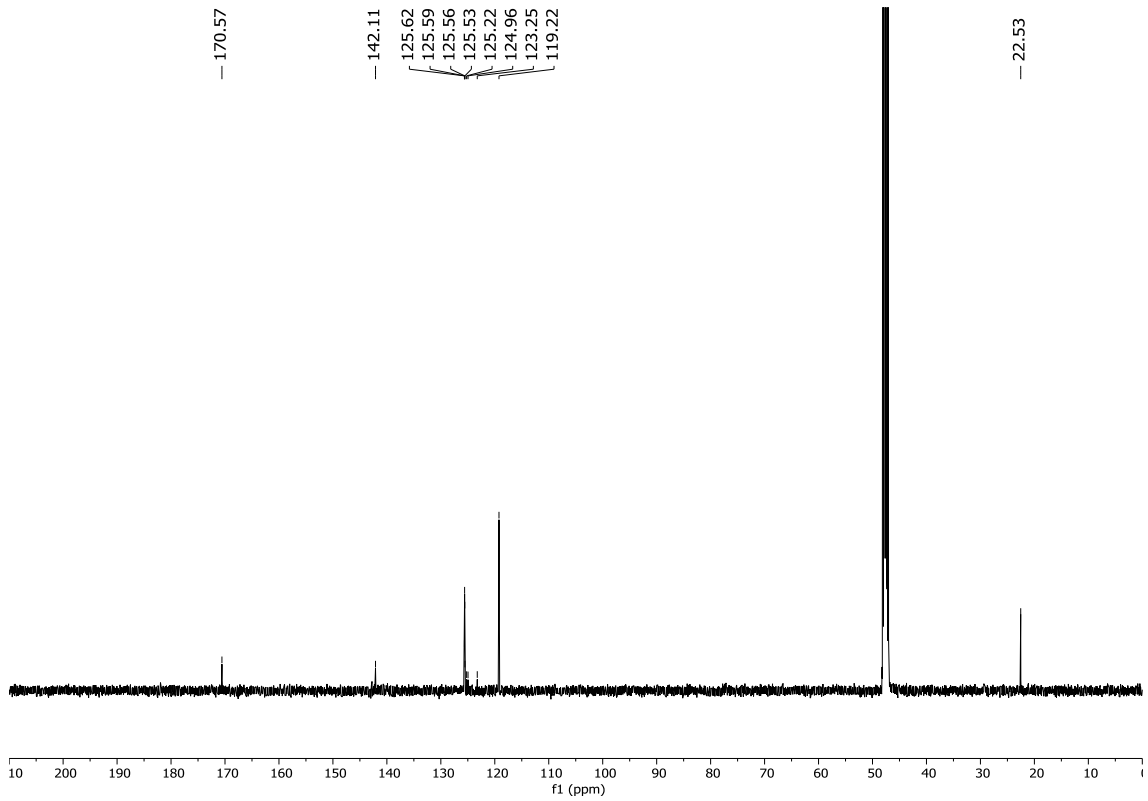

2-Phenyl-N-(prop-2-yn-1-yl)acetamide

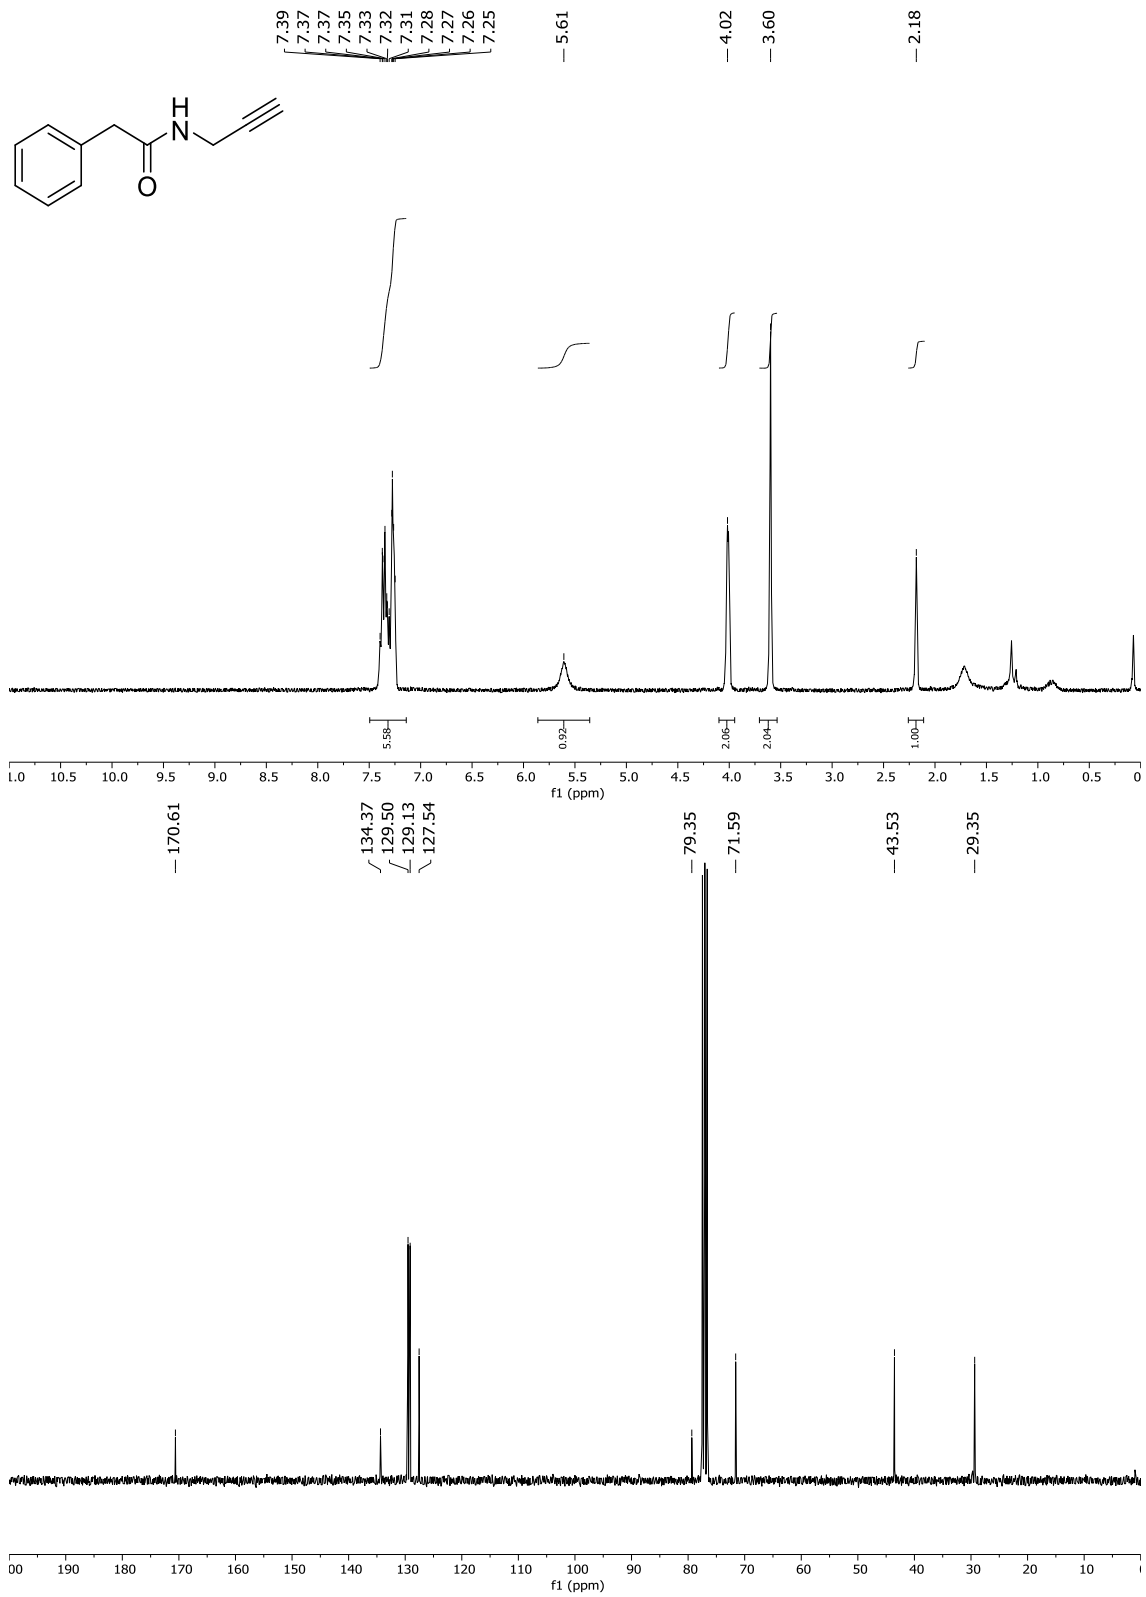

*N*-Allyl-2-phenylacetamide

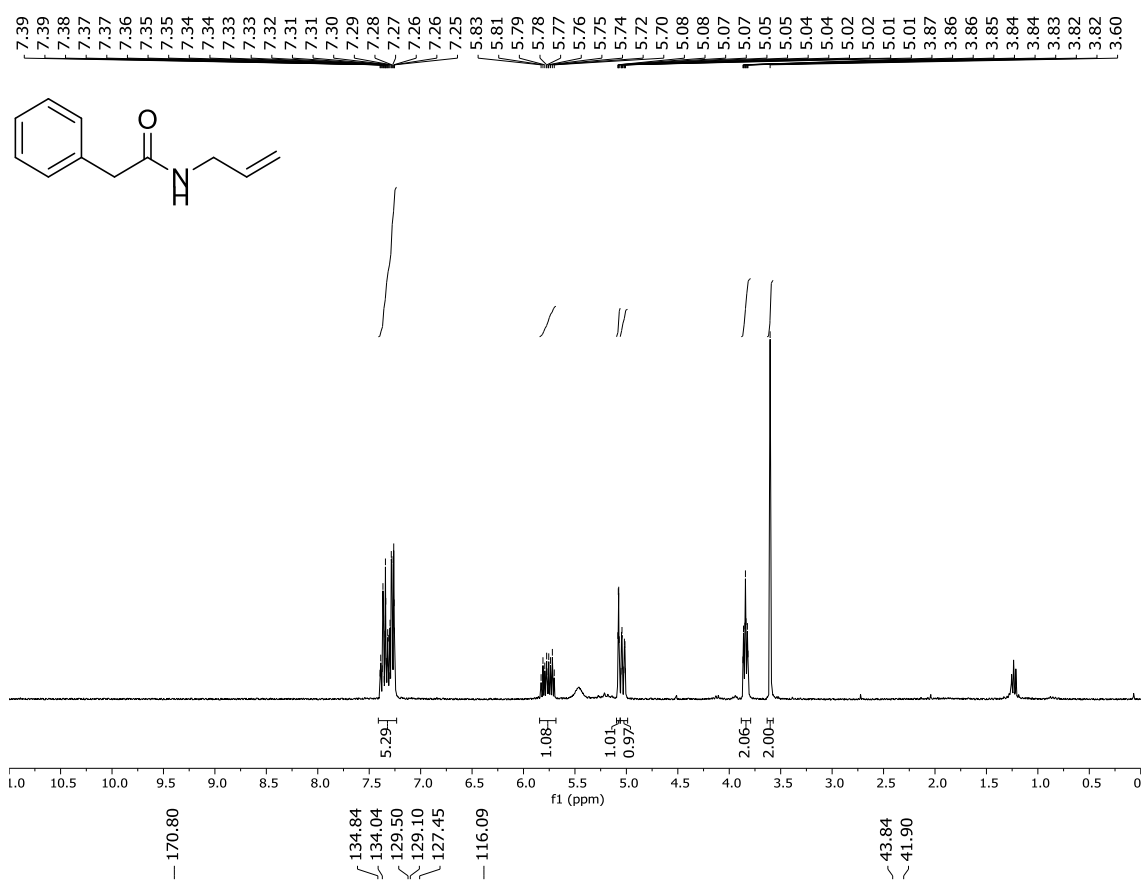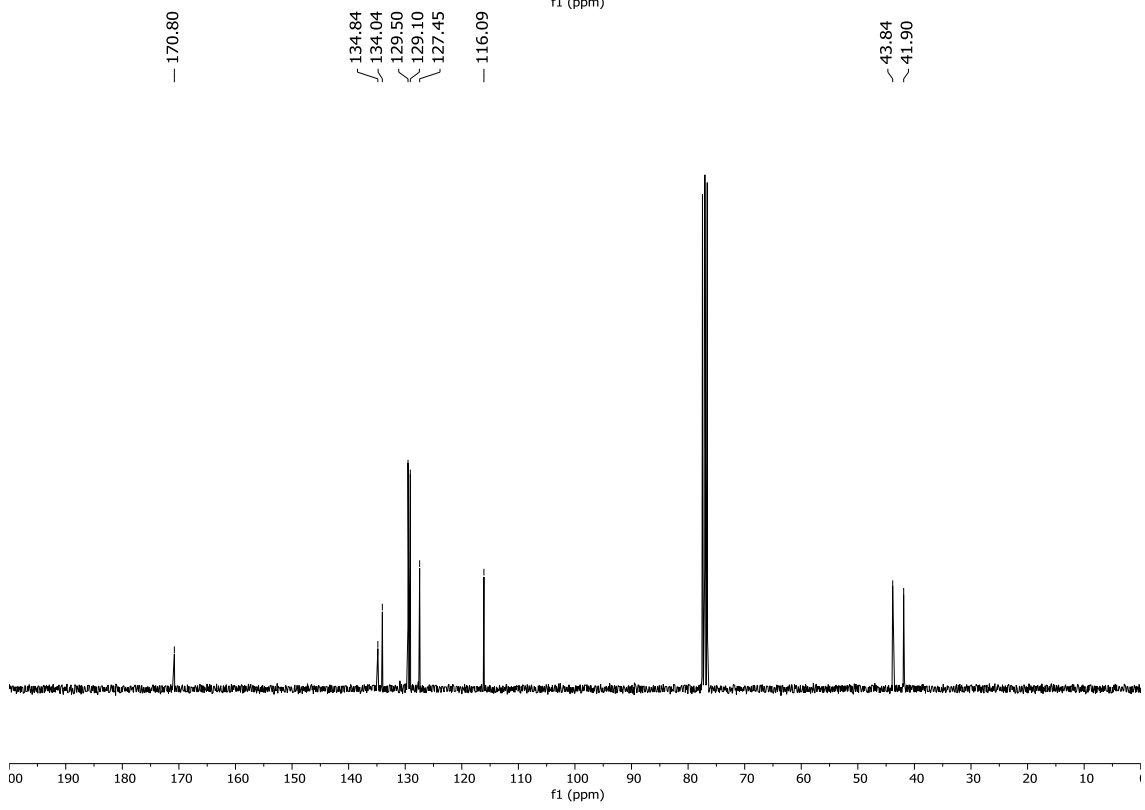

N-Benzyl-2,2,2-trifluoroacetamide

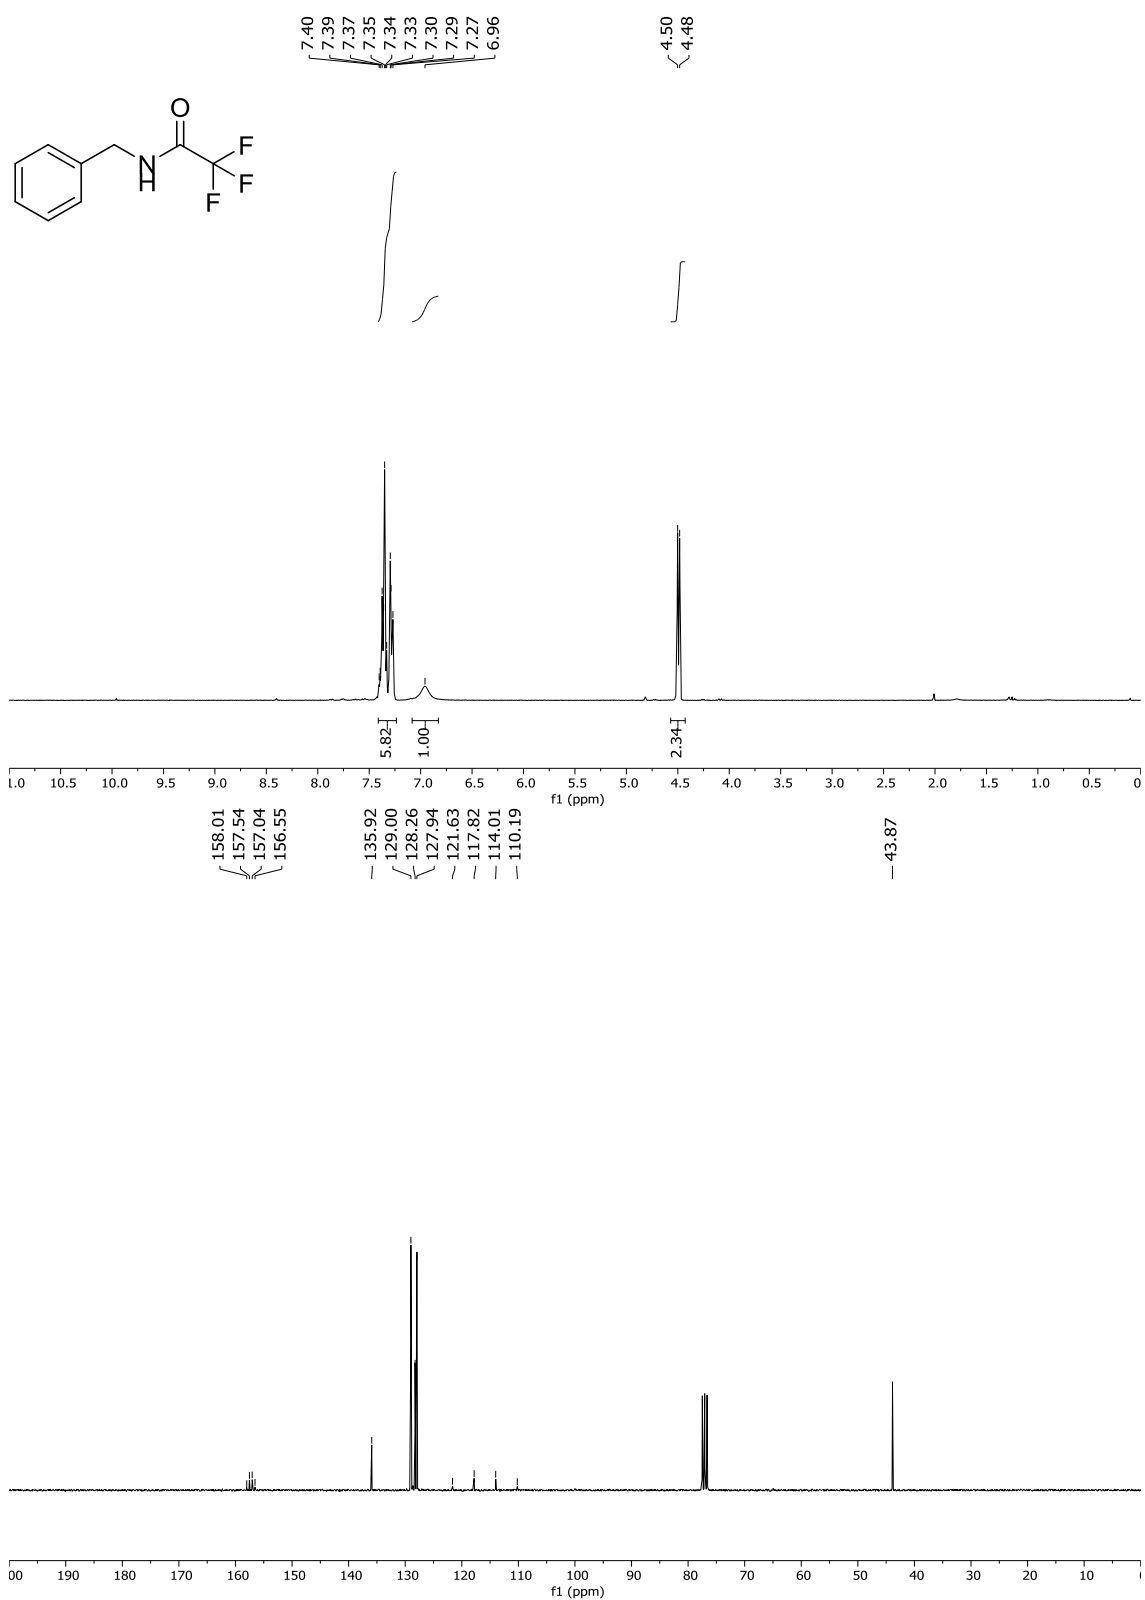

# 2,2,2-Trifluoro-N-phenylacetamide

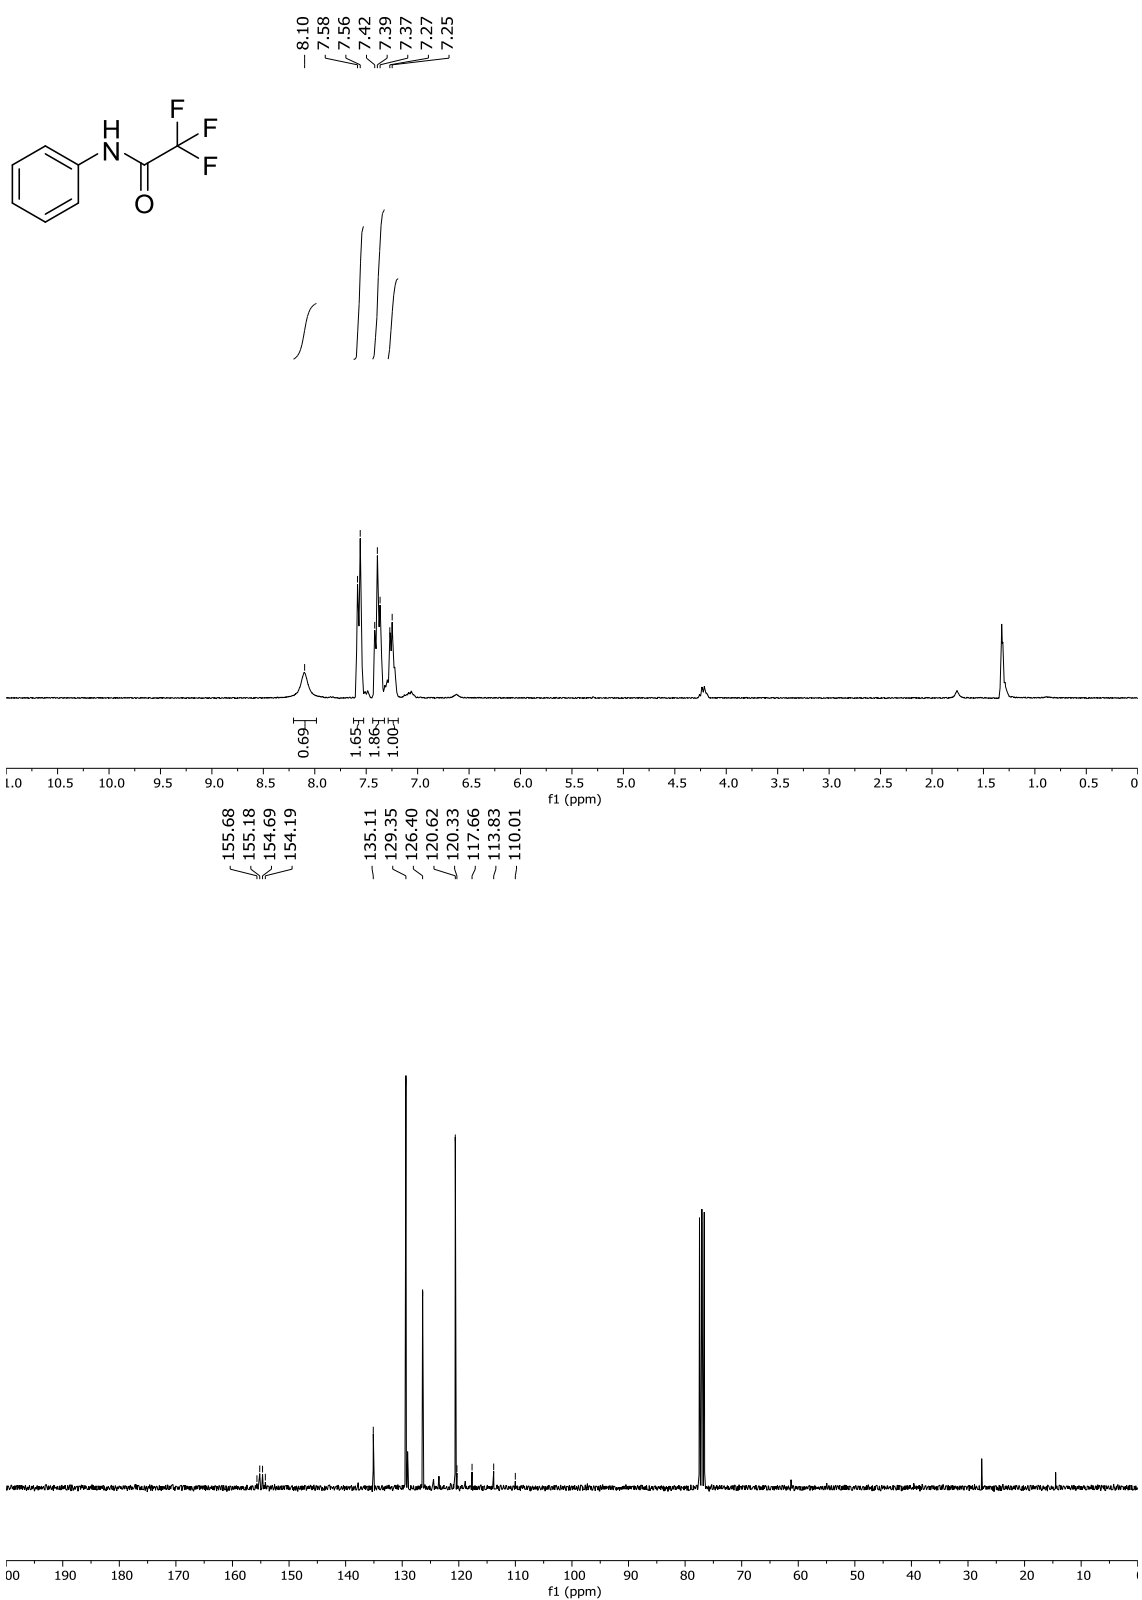

*N*-(2-Ethylphenyl)-2,2,2-trifluoroacetamide

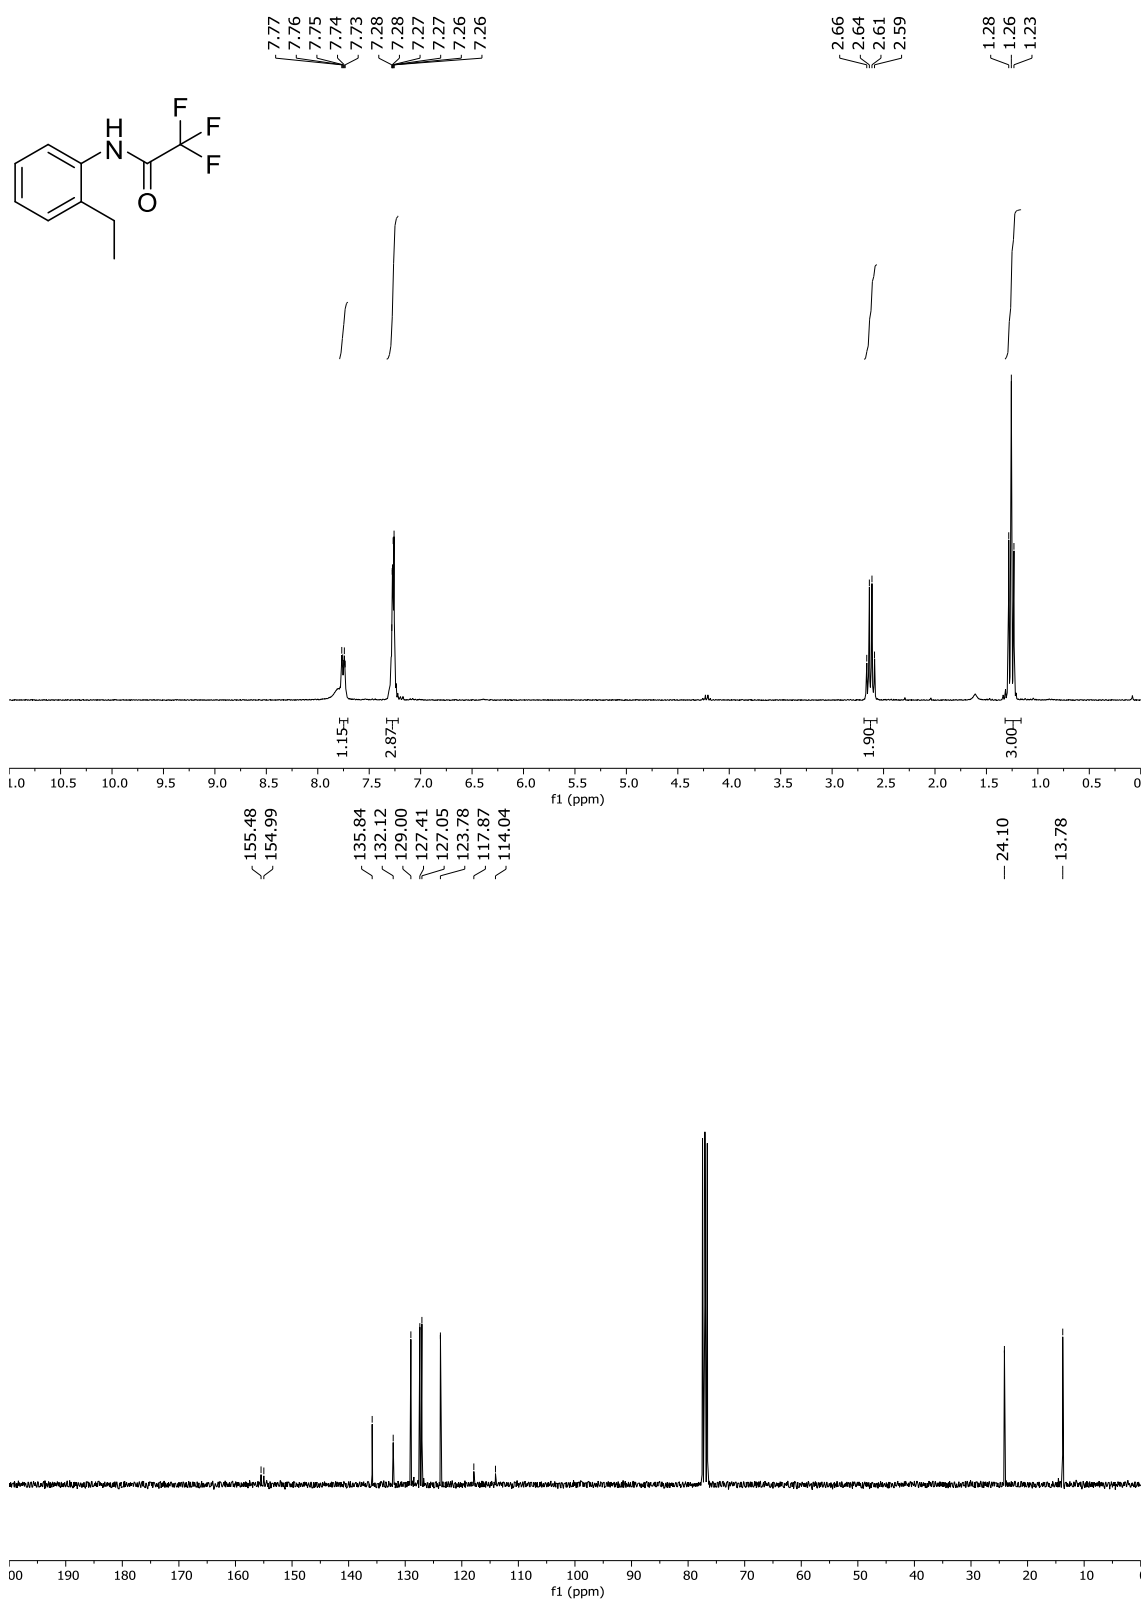



*N*-(4-Ethylphenyl)-2,2,2-trifluoroacetamide

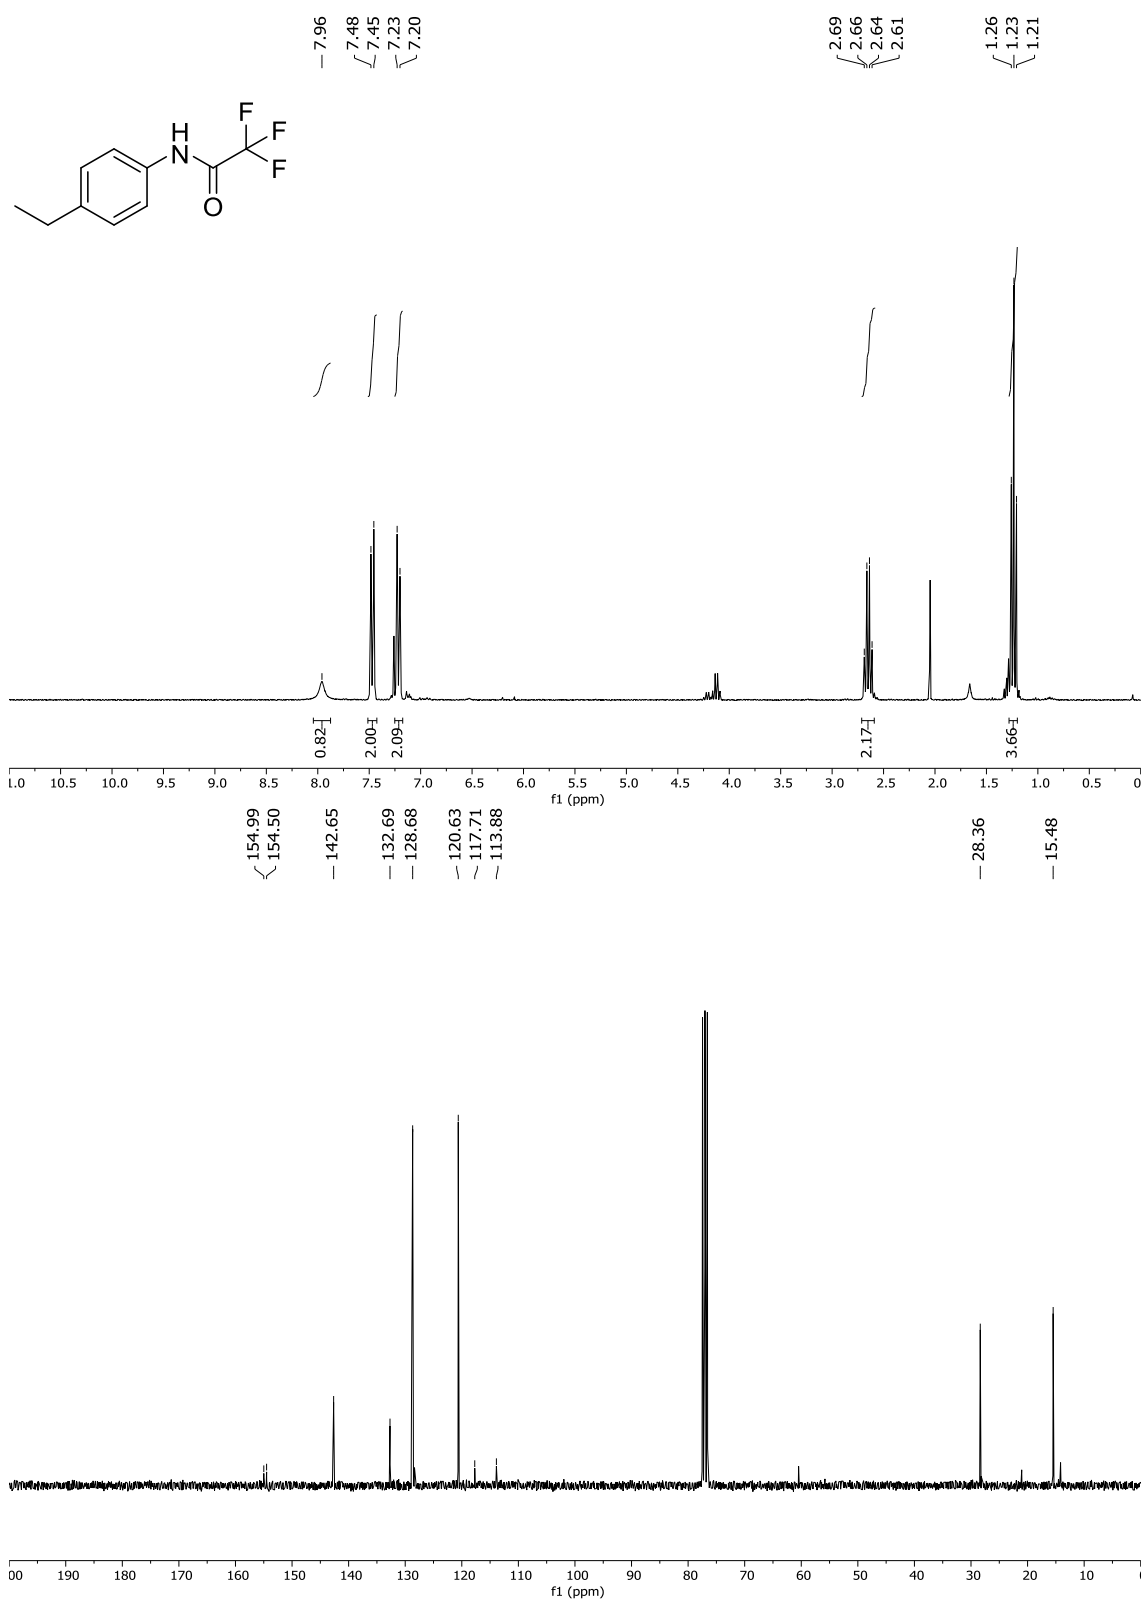

N-Phenylpent-4-ynamide

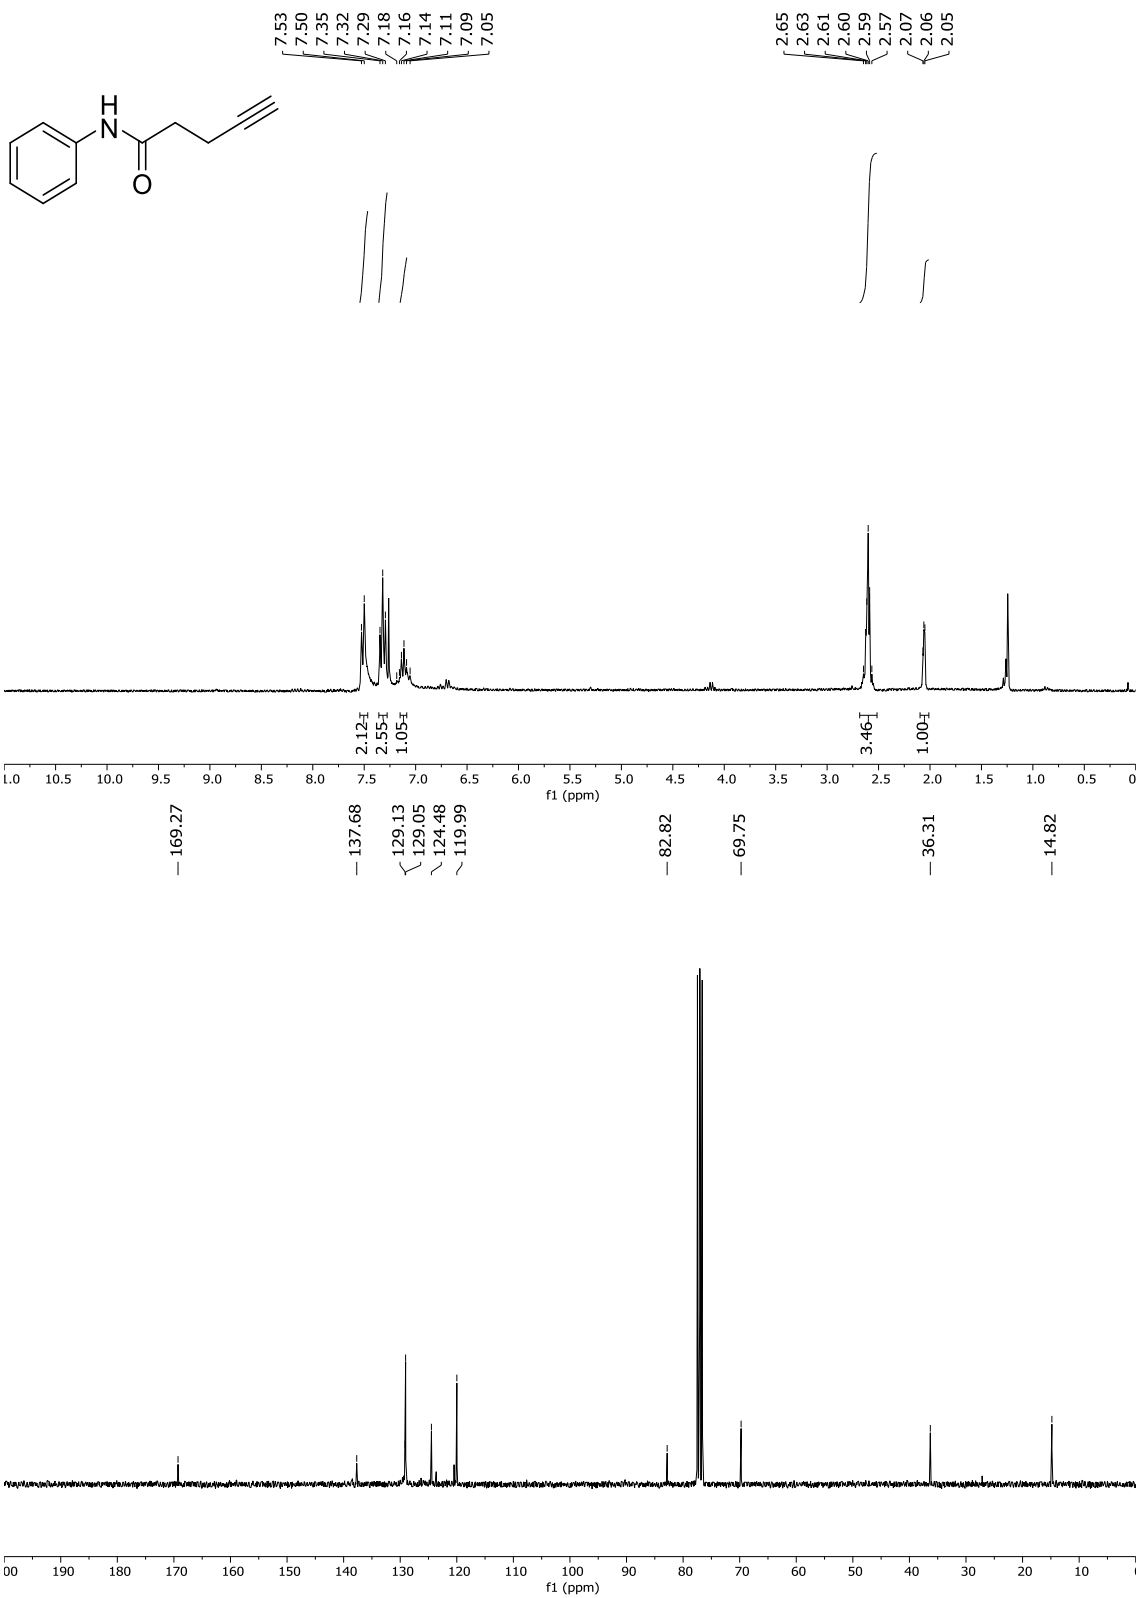

### 3-Methyl-N-phenylpent-4-enamide

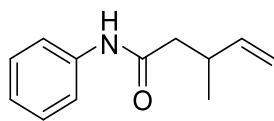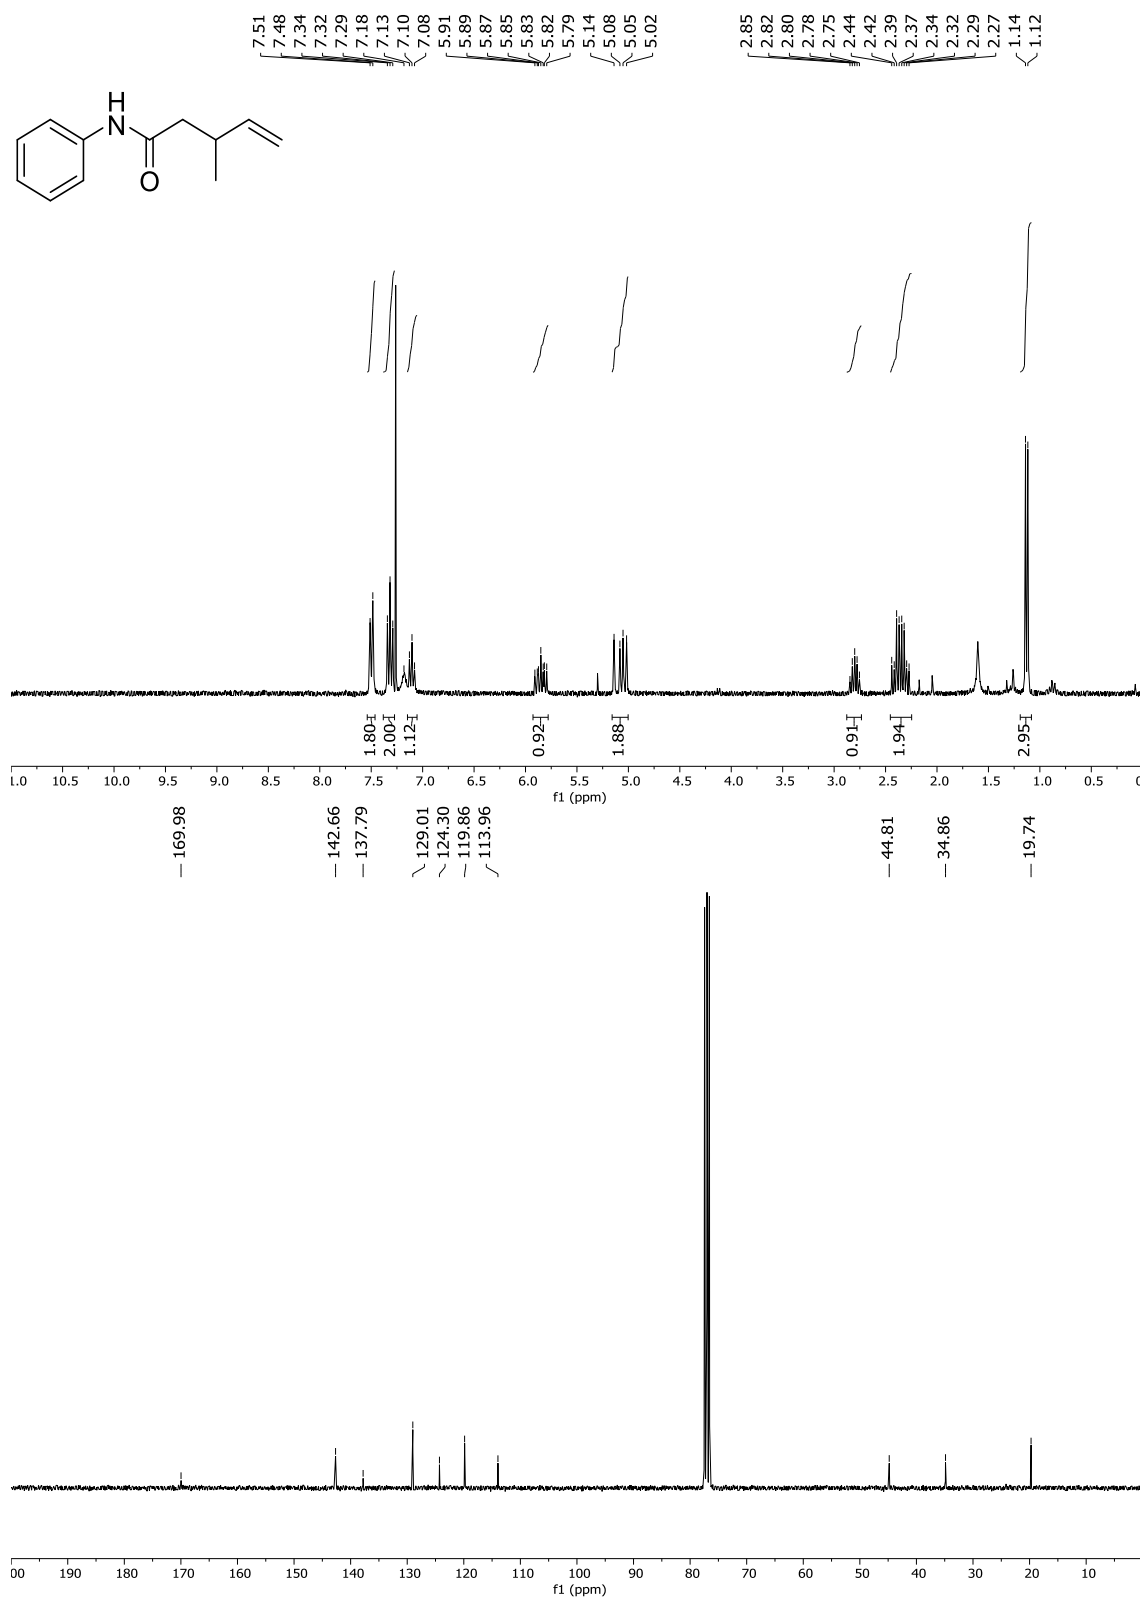

(S)-N-(1-Phenylethyl)propionamide

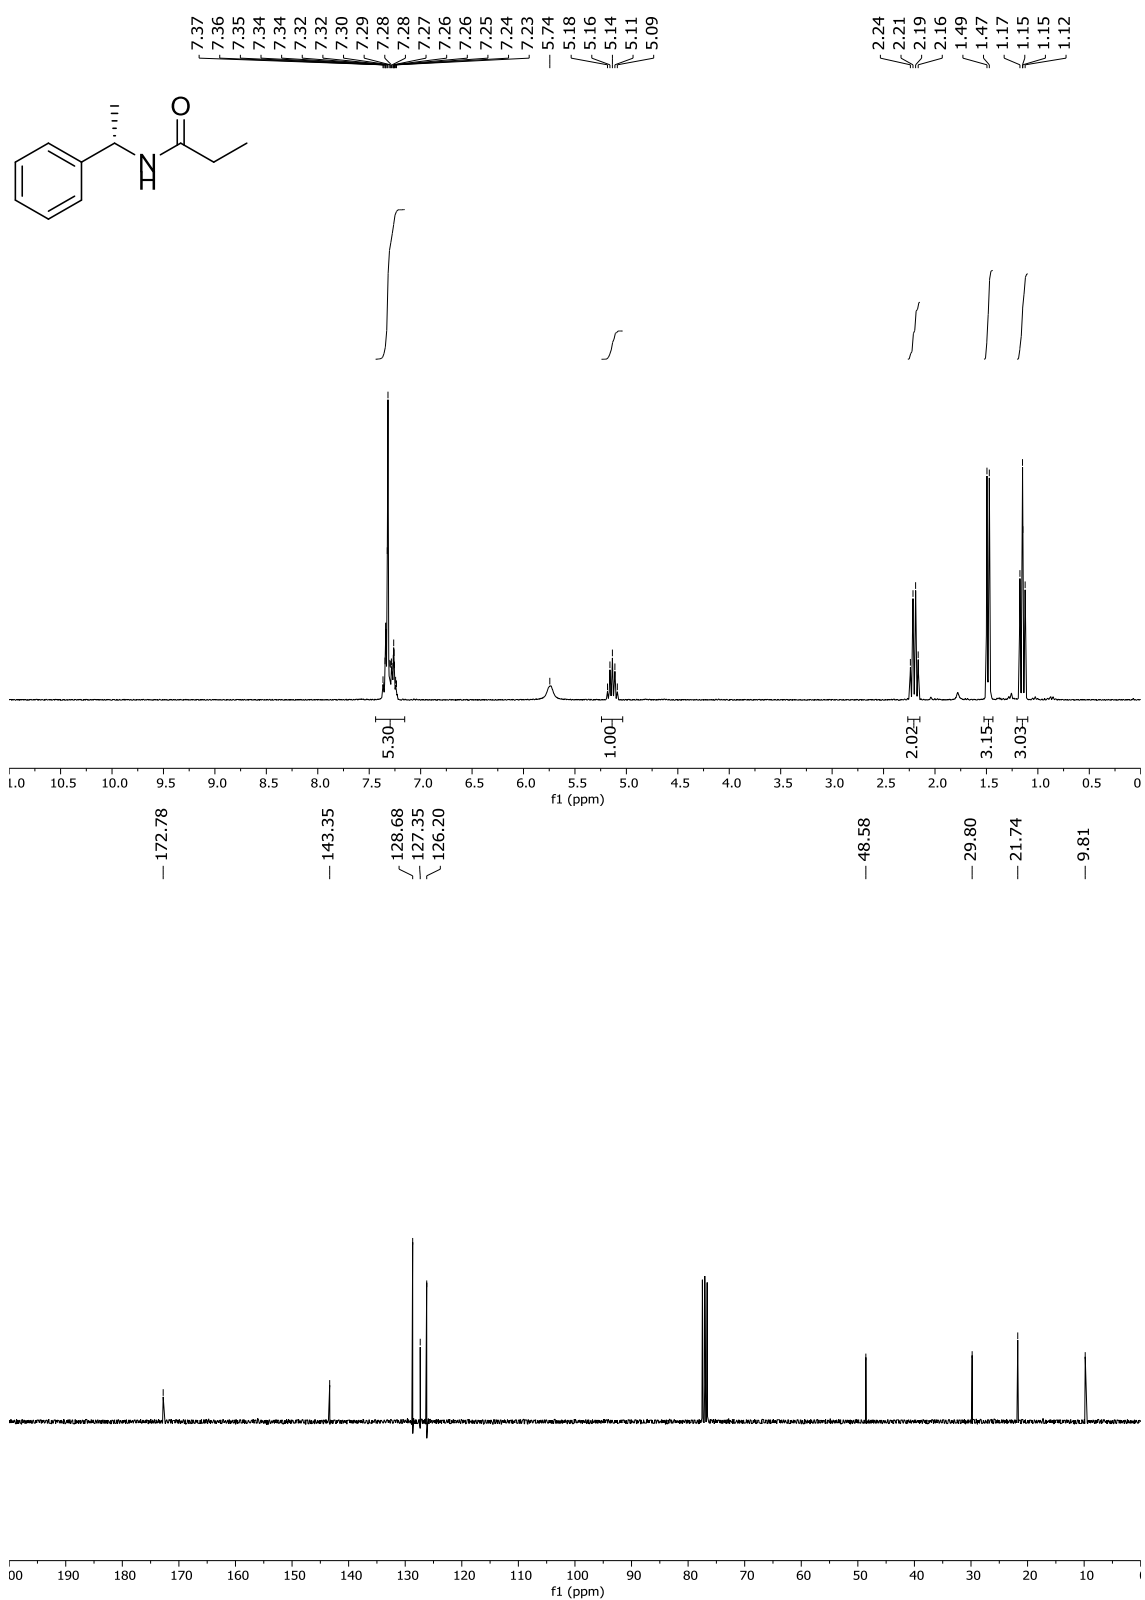

N-Phenylpropionamide

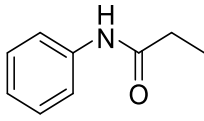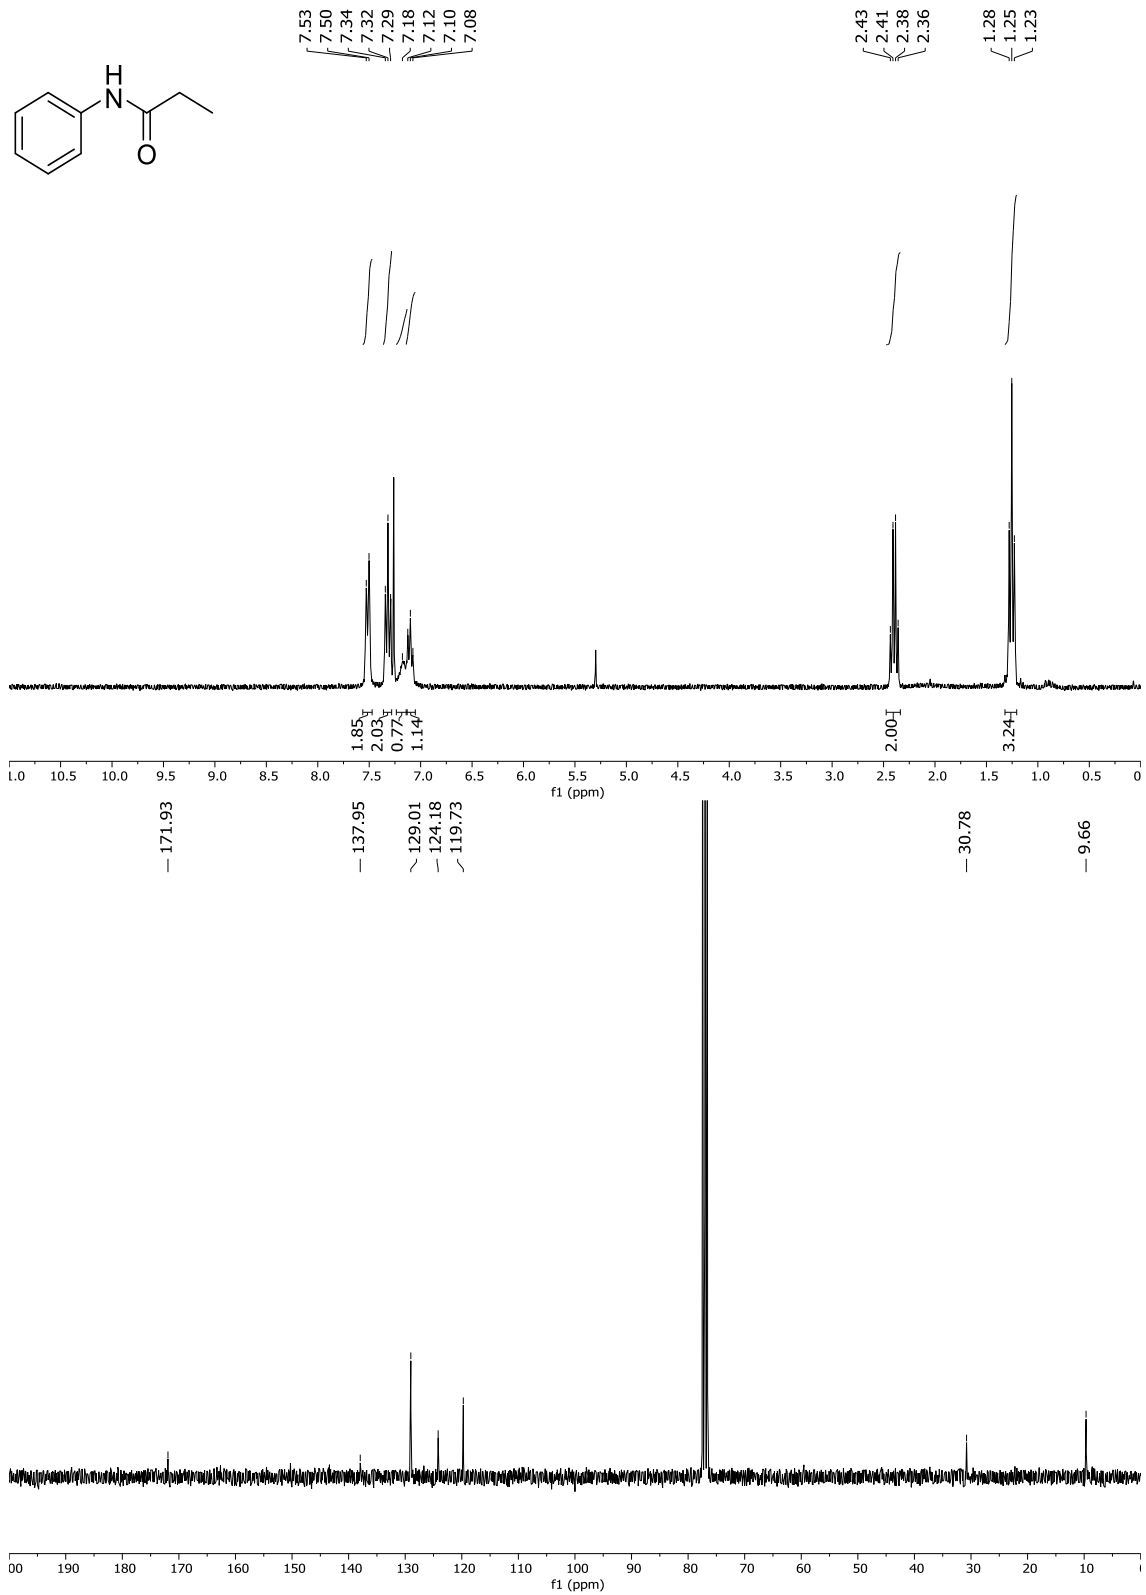

# N-(4-Methoxyphenyl)hex-5-ynamide

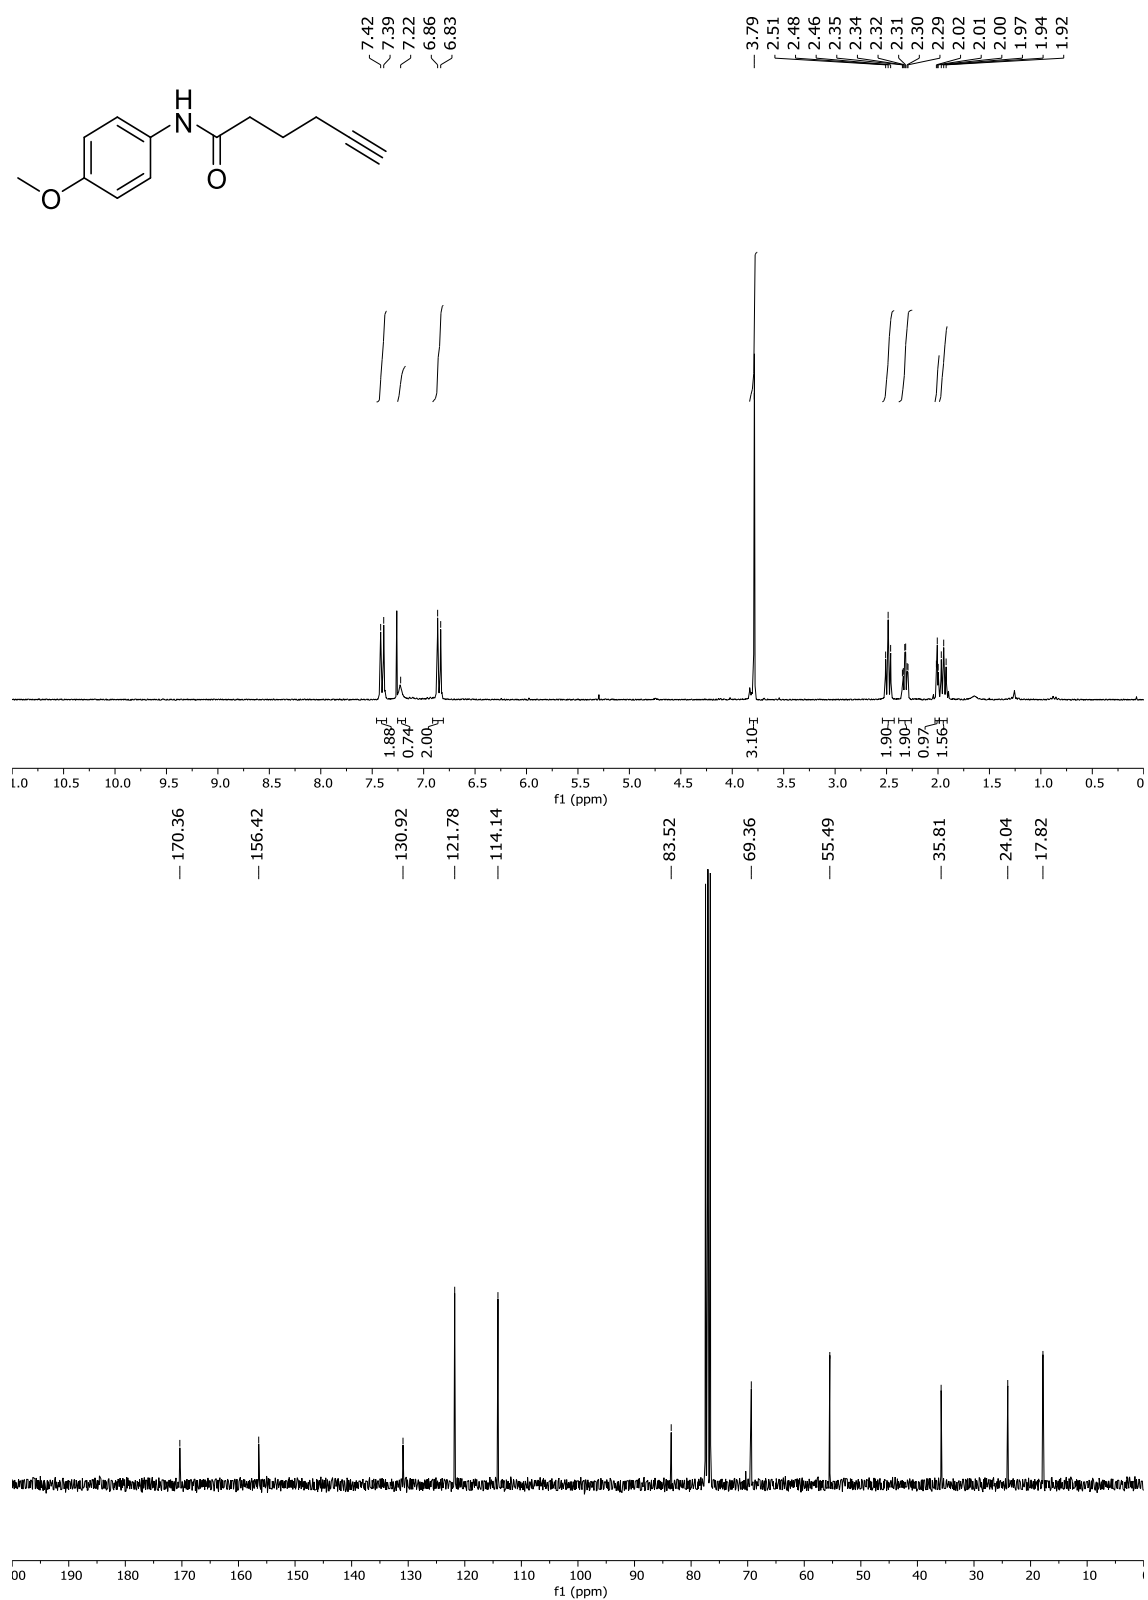

N-3-Diphenylpropanamide

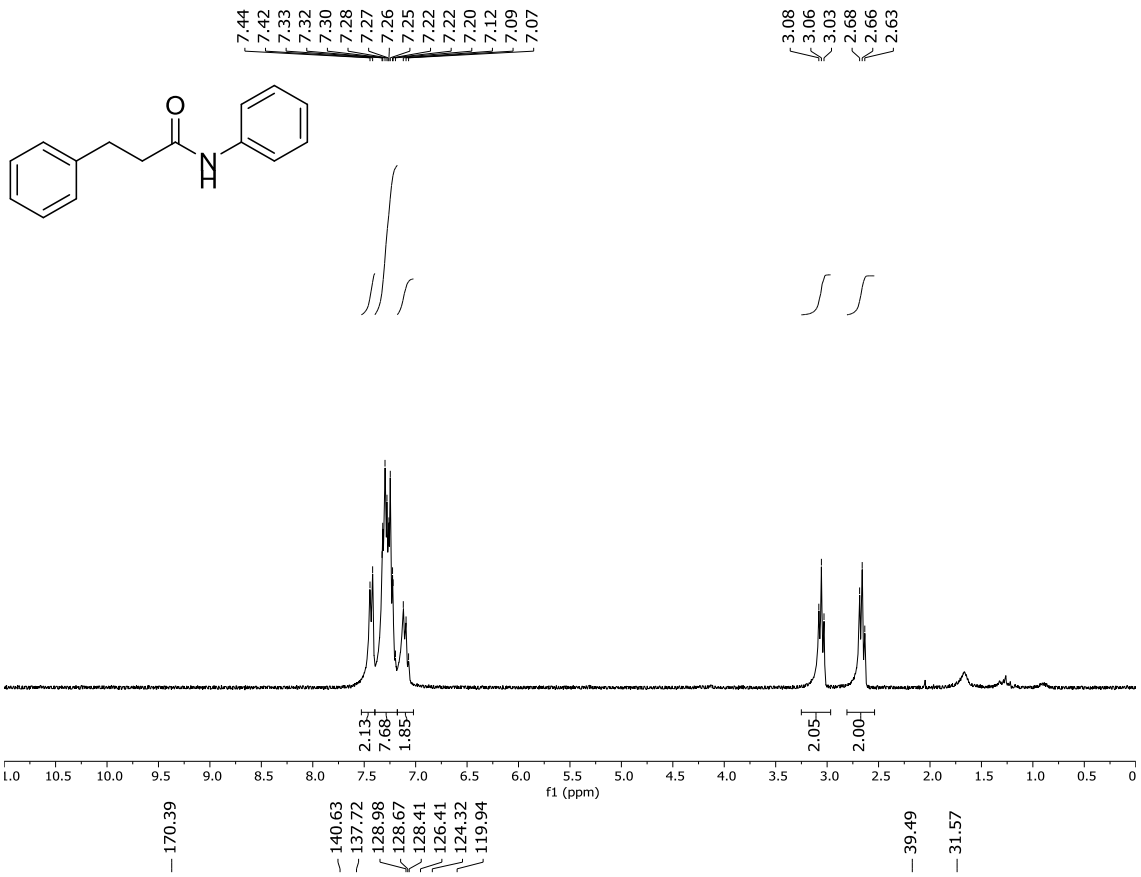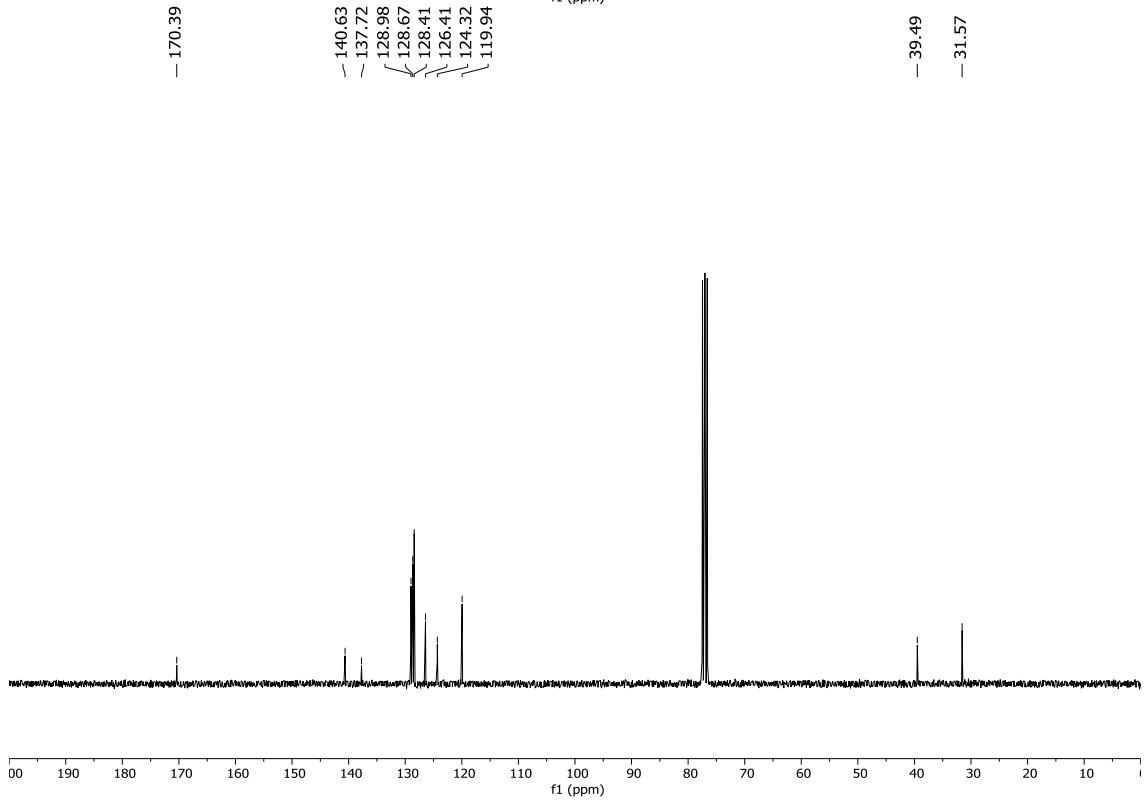

2-(Cyclopent-2-en-yl)-N-(3,4-dimethoxybenzyl)acetamide

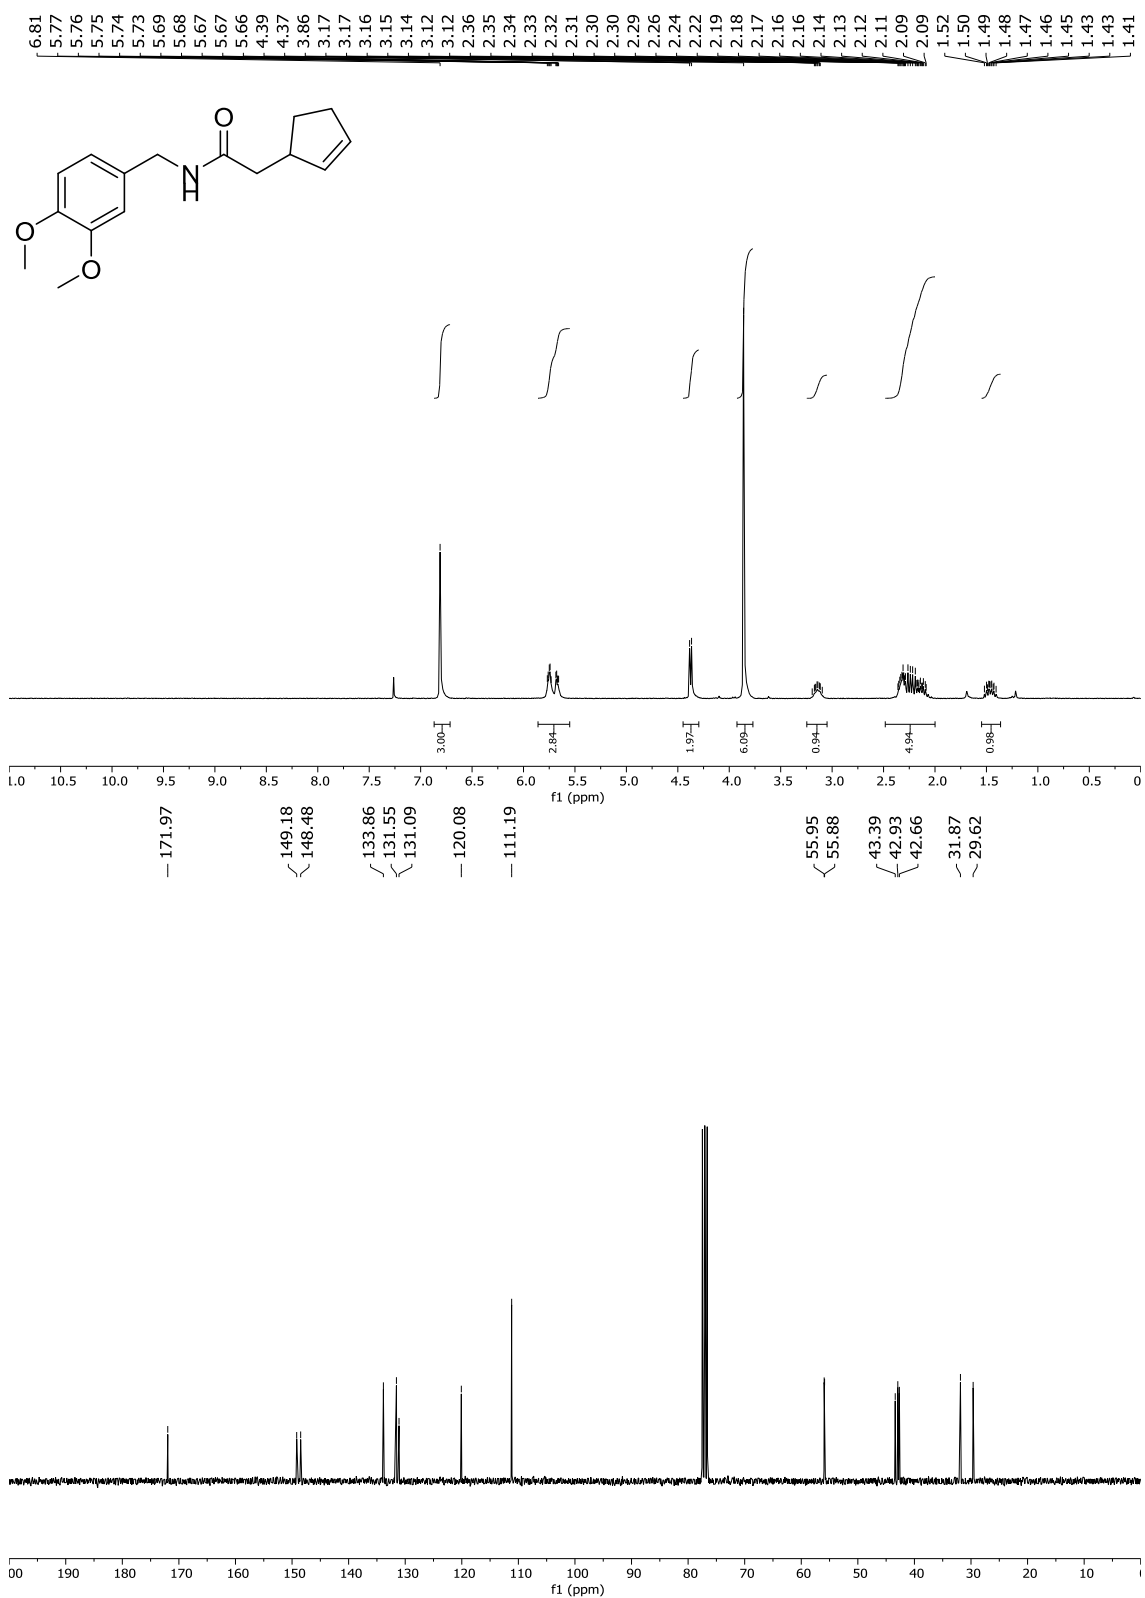



# N-(4-Ethylphenyl)pent-4-enamide

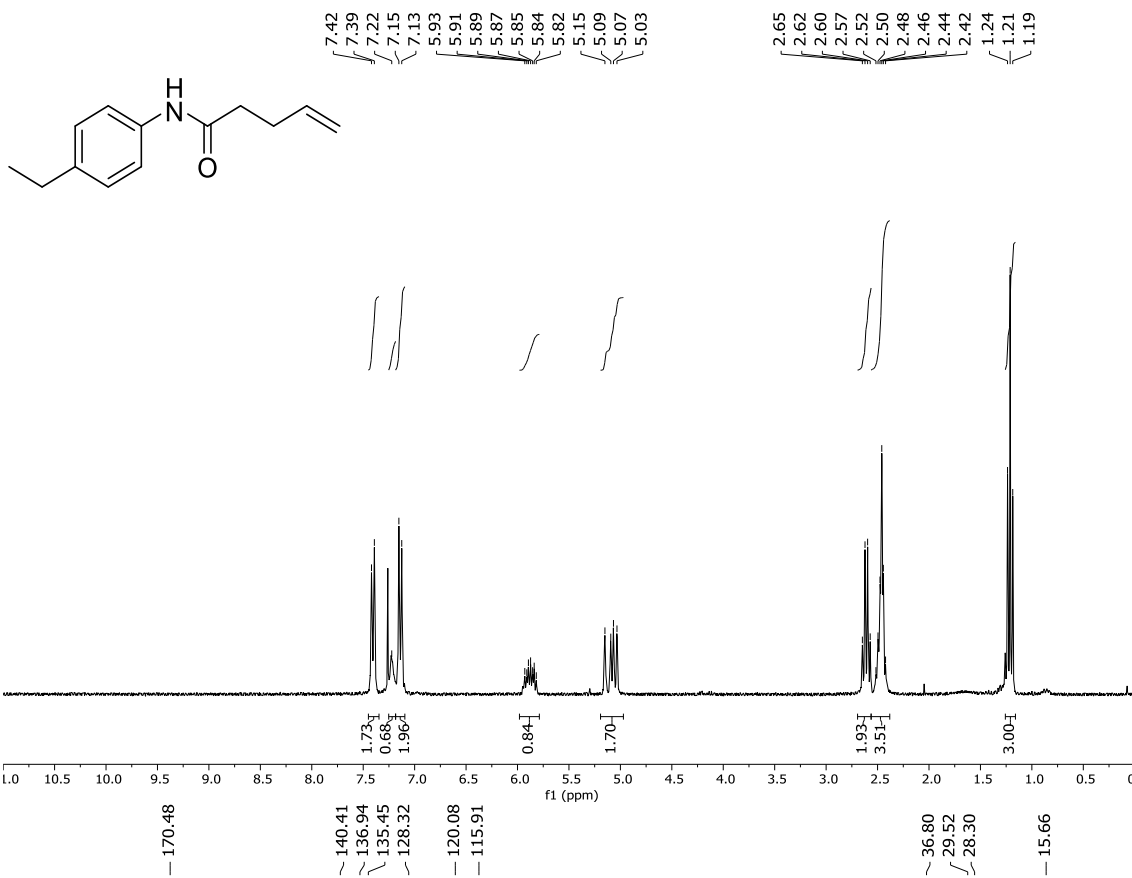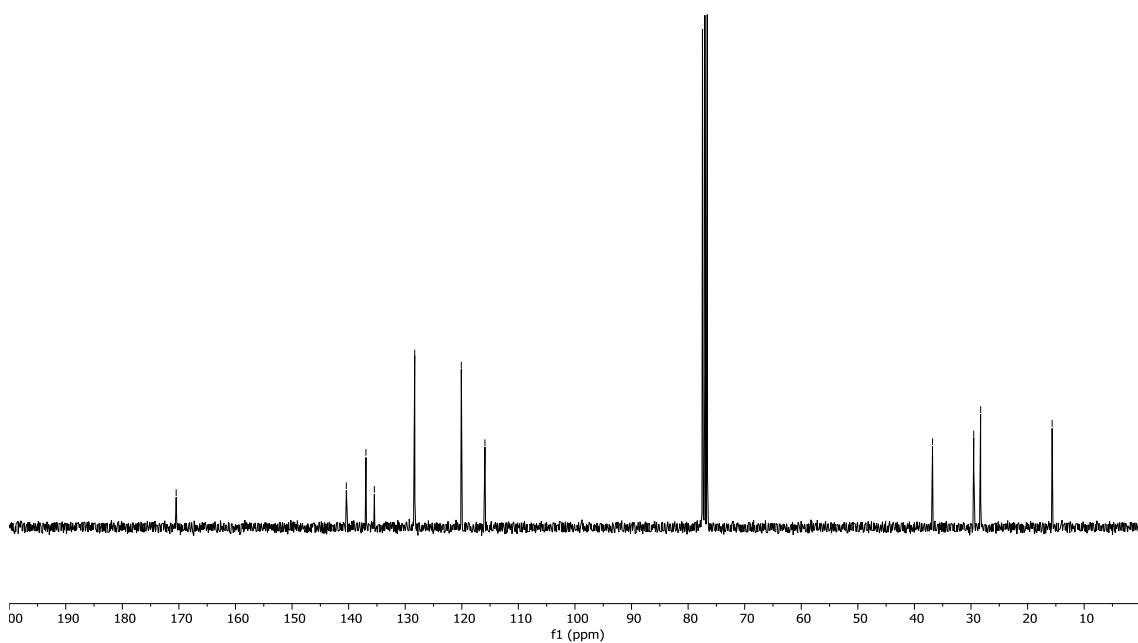

*N*-Phenyl-2-(prop-2-yn-1-yl)octanamide

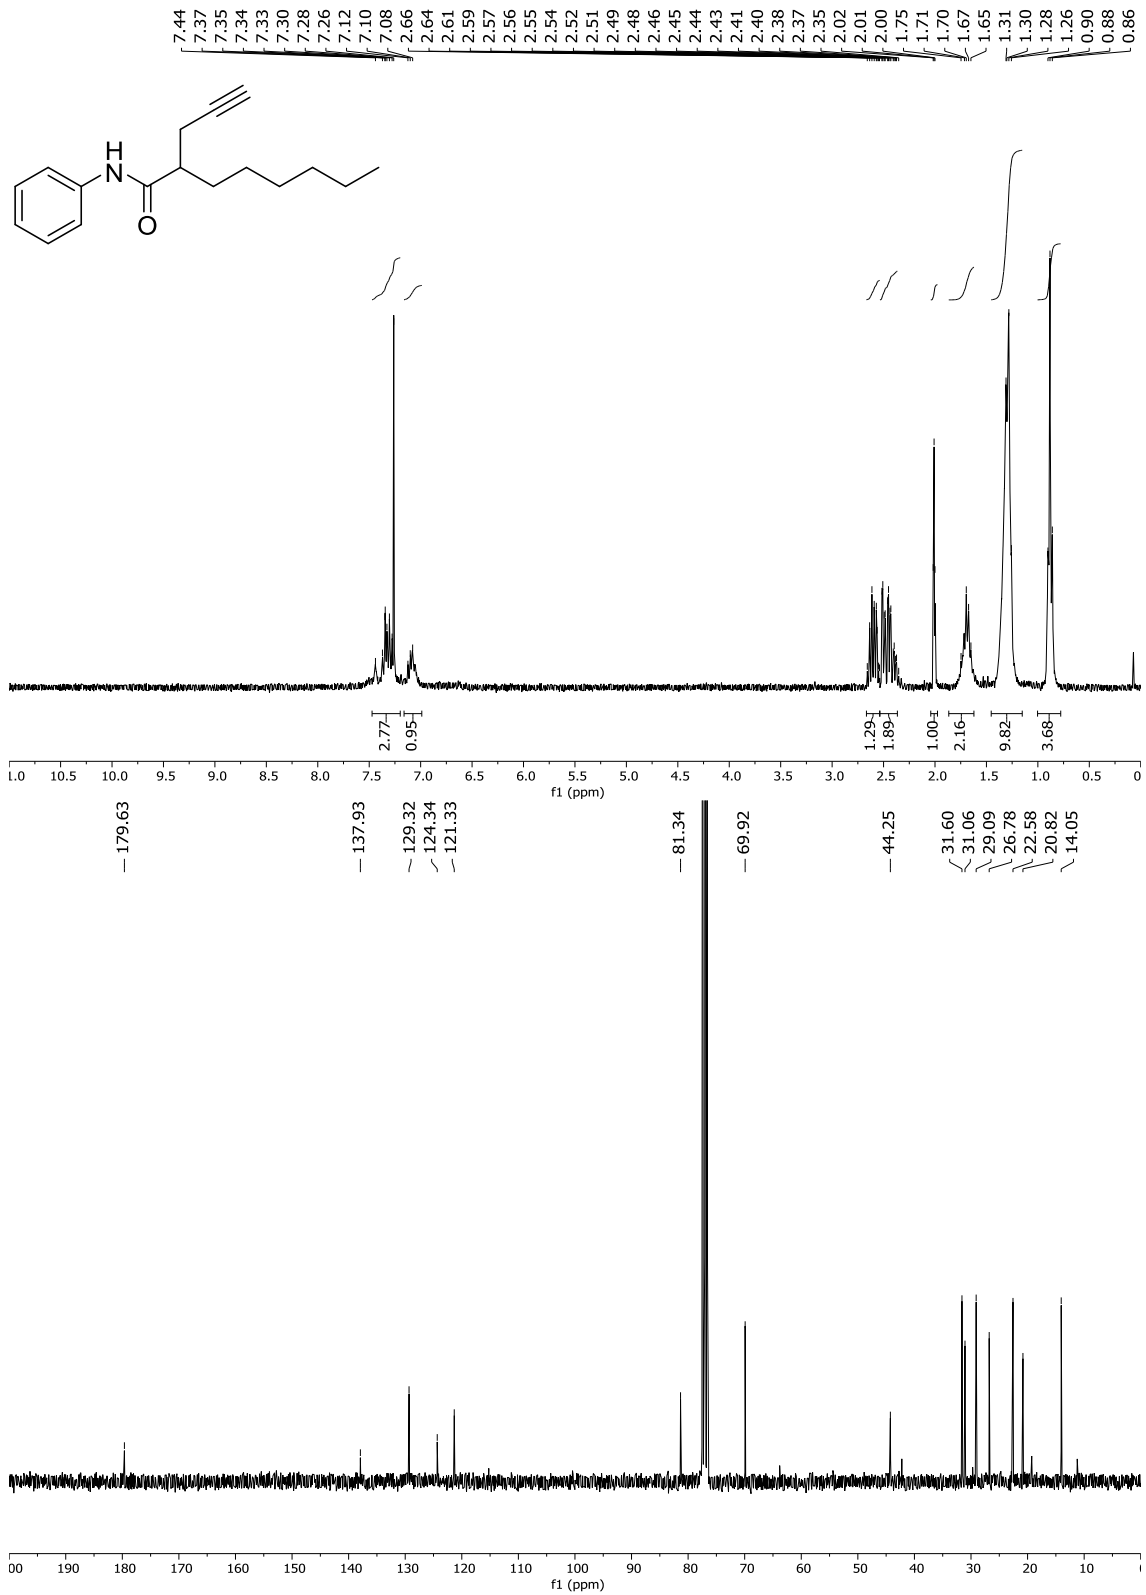

1-(3,4-Dihydroisoquinolin-2(1H-yl)ethan-1-one

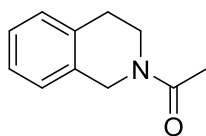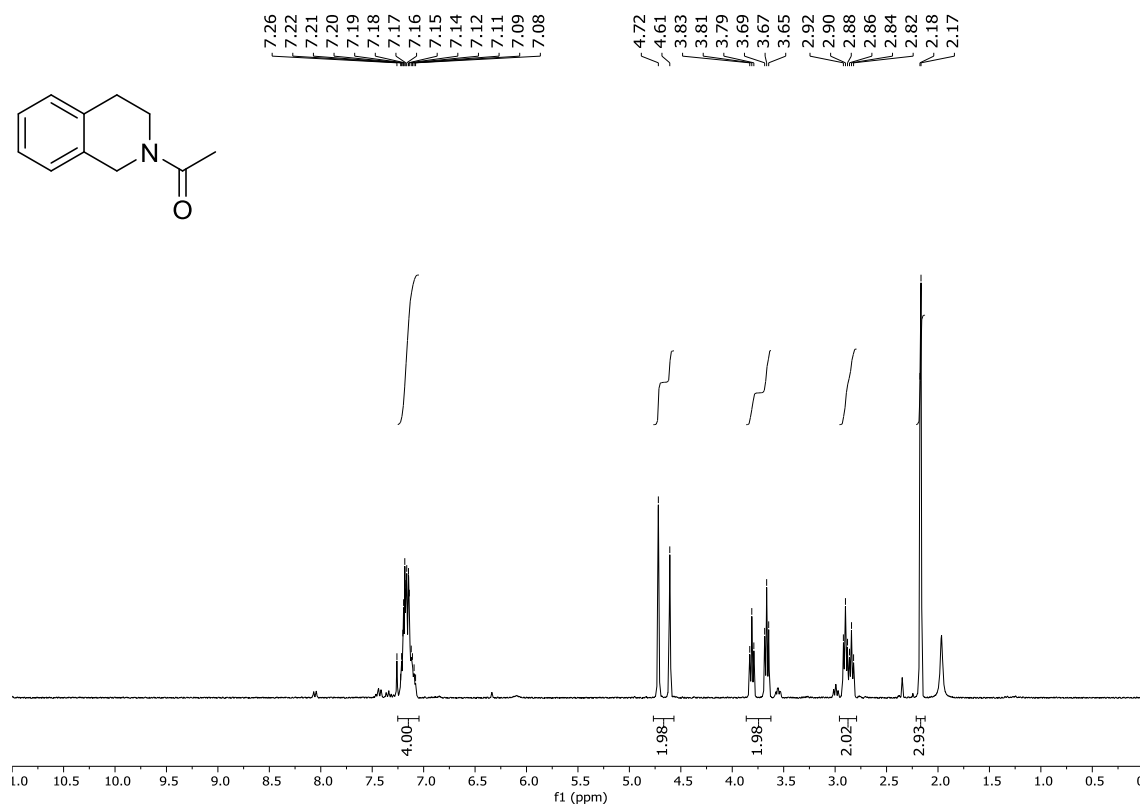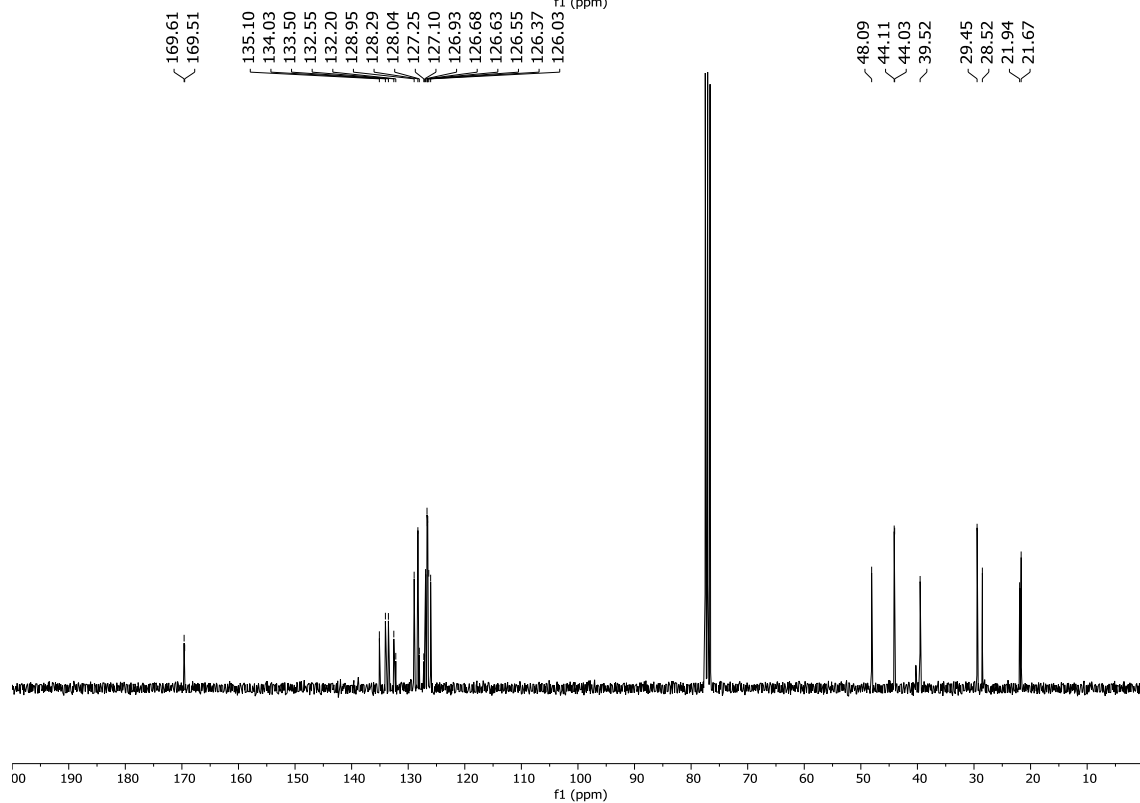

N-Acetylindoline

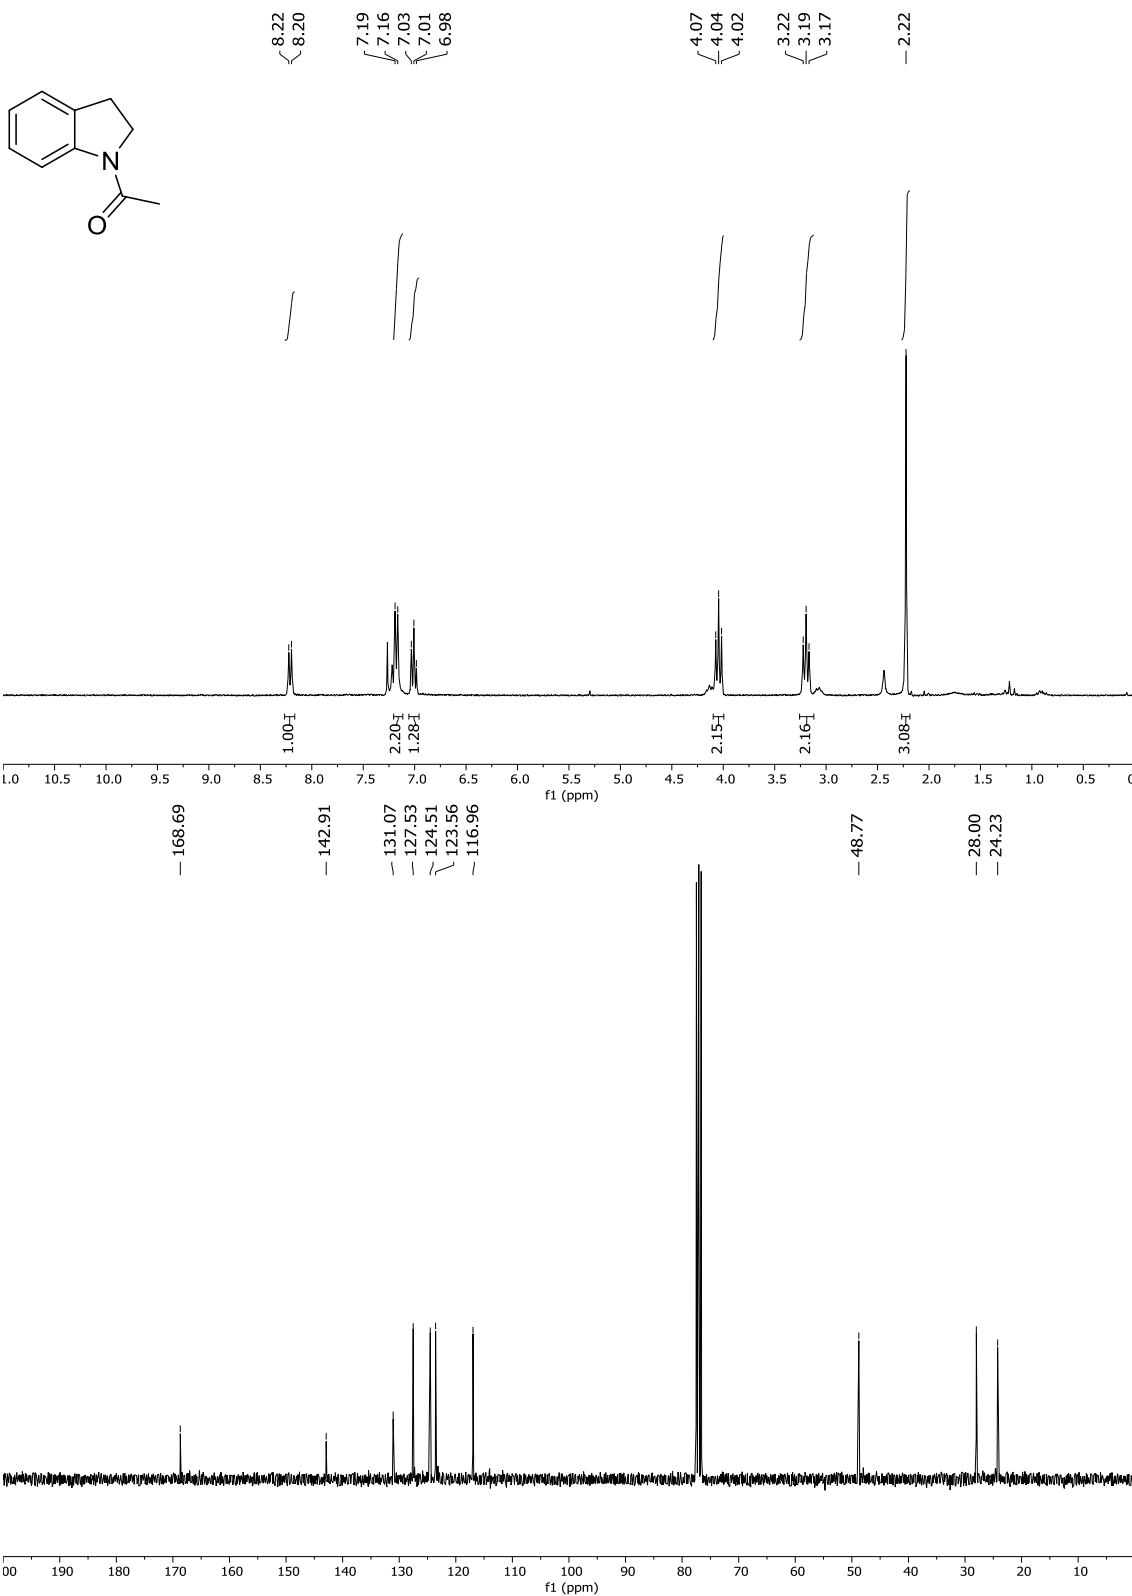

2-phenyl-1-(pyrrolidin-1-yl)ethan-1-one

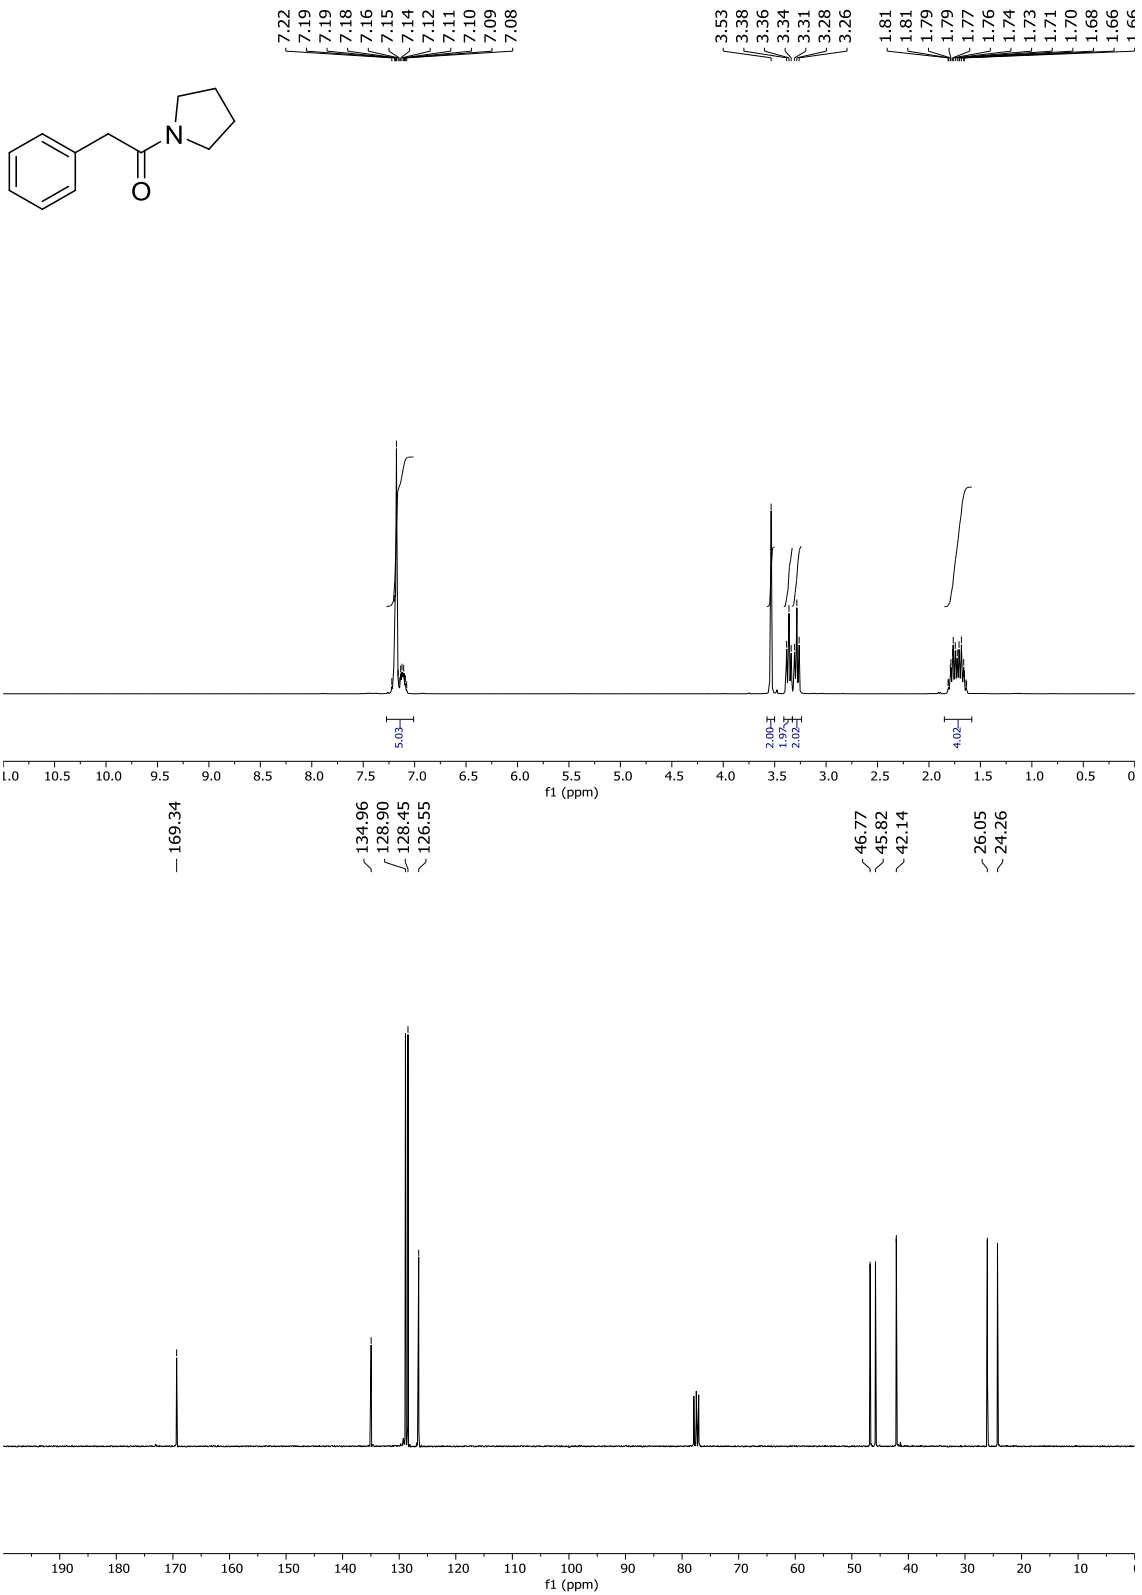

# 1-morpholino-3-phenylpropan-1-one

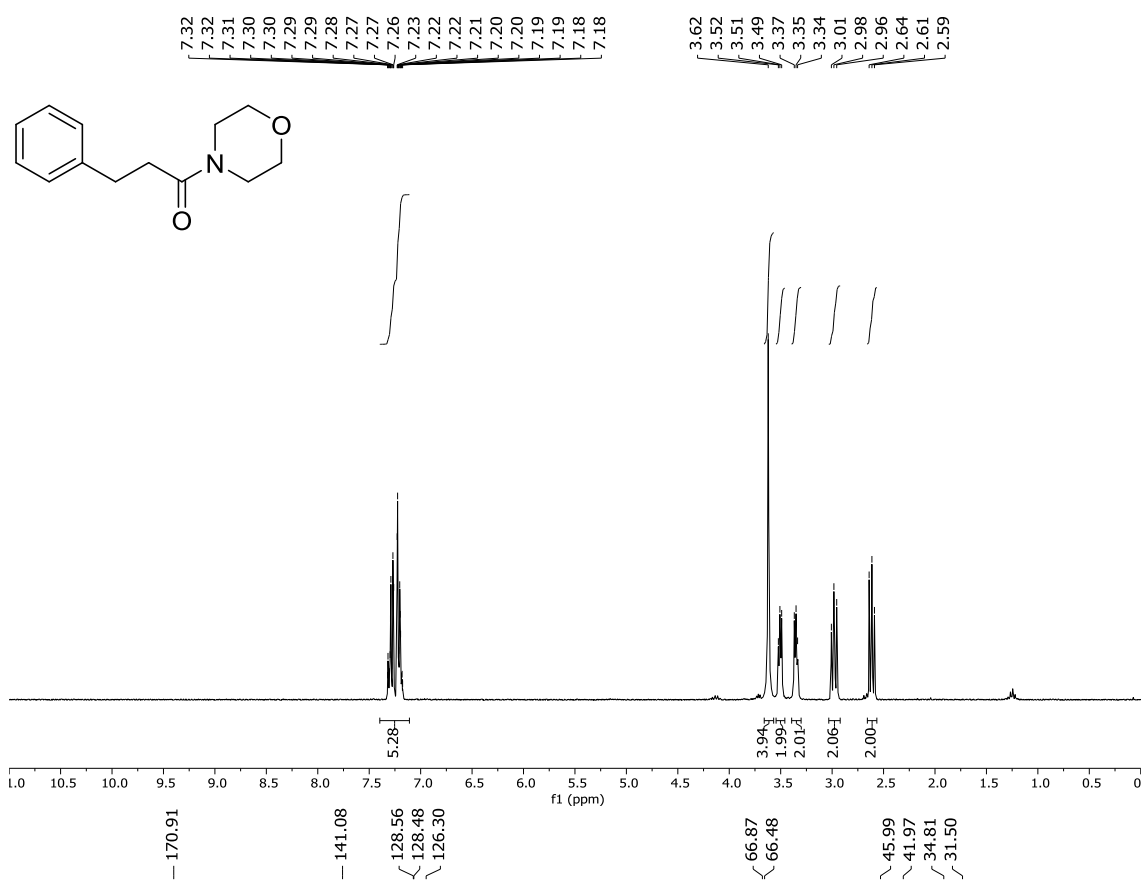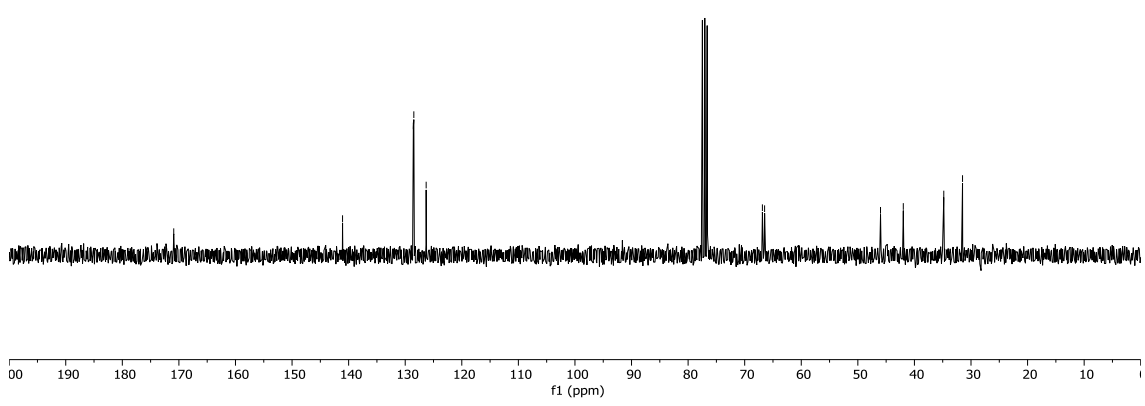

1-morpholino-2-(2-phenoxyphenyl)ethan-1-one

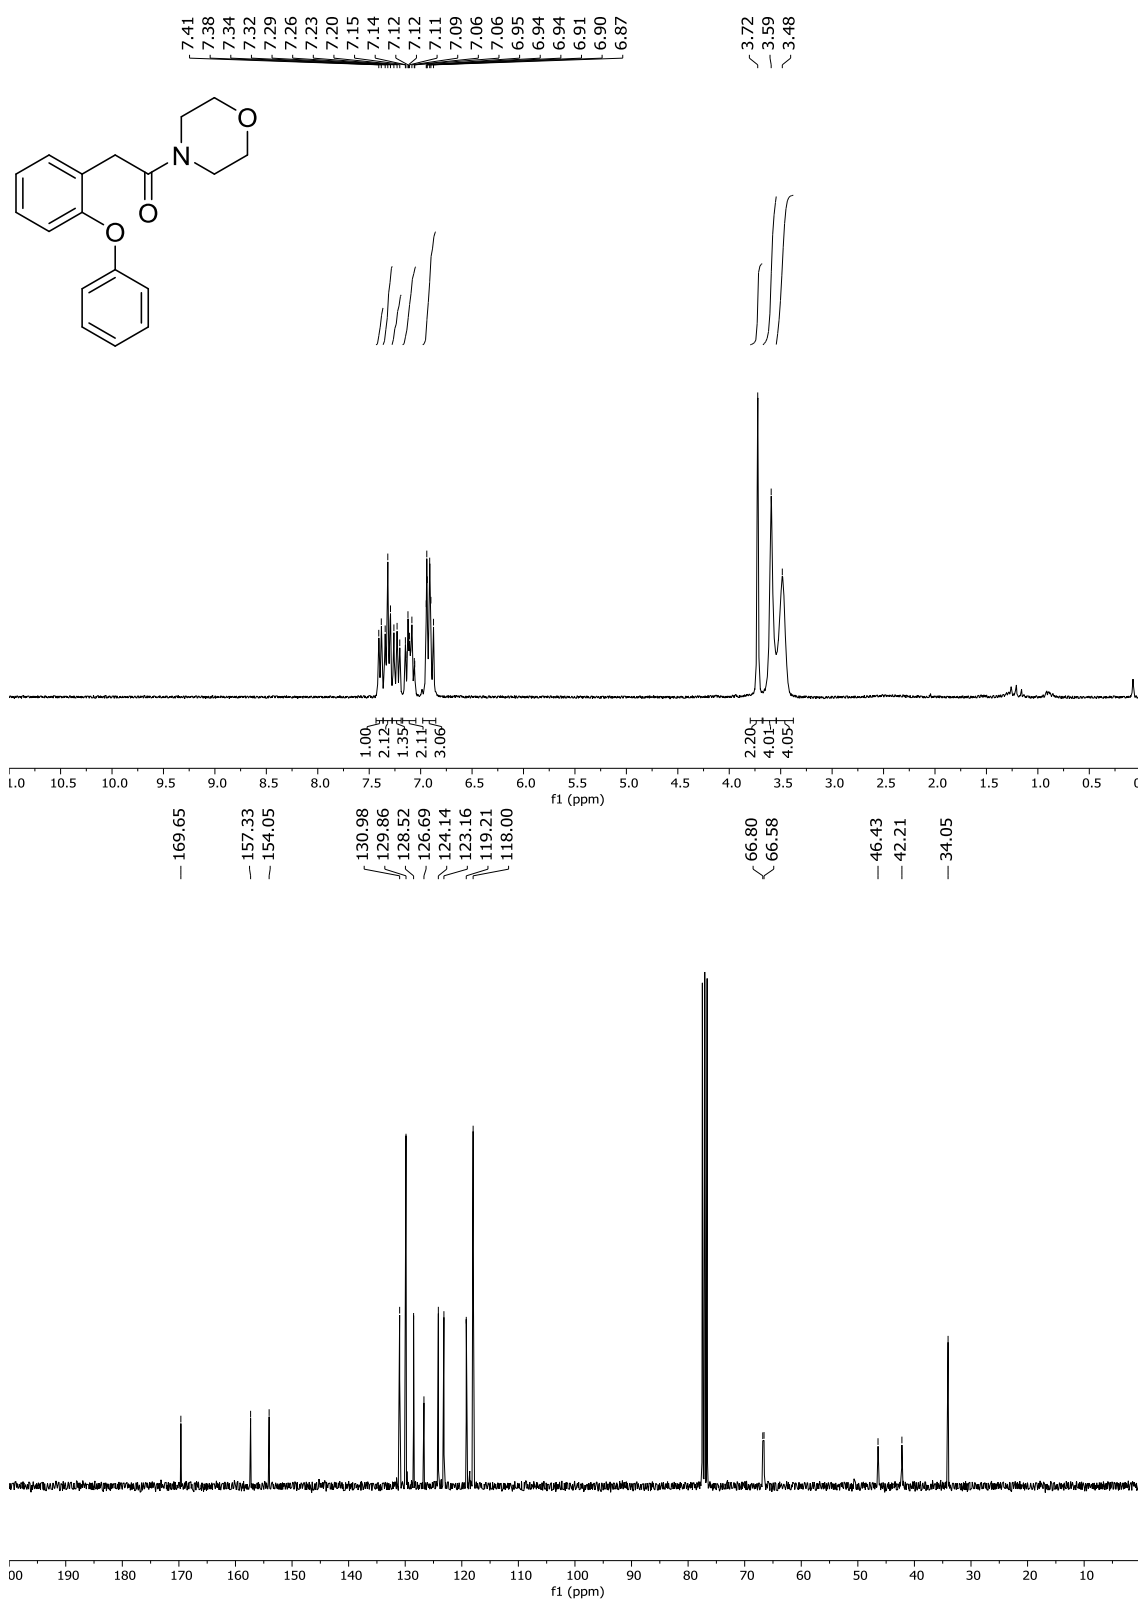

Supplement: d3cy01429k1.pdf [file d3cy01429k1.pdf]
